# Supplementary material for: Time-dependent genetic effects on gene expression implicate aging processes
Source: HighWire-hosted journal article supplement (doi:10.1101/gr.207688.116), 2017-03-16
Supplement: Supplemental_Legends.docx [file Supplemental_Legends.docx]

**Supplemental figures legend:**

**Supplemental Figure S1:** Histogram of the individuals’ age at the first visit (A). Histogram of the difference in years between the two visits (B).

**Supplemental Figure S2:** Proportion of 22 immune cell types estimated using CIBERSORT (Newman et al. 2015) at each time point. The p-value of the Wilcoxon test is shown on top of each plot.

**Supplemental Figure S3:** First threeprincipal components of gene expression colored by time point (**A**,**B**,**C**). Correlation between the 10 first principal components and time point (**D**).

**Supplemental Figure S4:** Correlation of the effect of time between the two time points (βTP) and the effect of age (βAge0) on gene expression estimated in a joint model for the 2213 genes differentially expressed due to the time point effect (1%FDR).

**Supplemental** **Figure S5:** Distribution of pvalues from a large cross-sectional study of aging in human peripheral blood (Peters et al. 2015) matching our differentially expressed genes.

Supplemental Figure S6: Histogram of the number of genes affected by 77 primary putative causal genes.

Supplemental Figure S7: Heritability of gene expression at time point 1 (A) and time point 2 (B). Number of genes with significant gain or loss of heritability between the first and the second time point (C). Heritability of the change in gene expression (time point 2 – time point 1) (D).

**Supplemental** **Figure S8:** Variance (log10) in gene expression between the first and second time point for all genes (**A**) and for upregulated, downregulated, putative causal and not differentially expressed genes (**B**).

**Supplemental** **Figure S9:** Differential effect of rs76194250 on the expression of *PFN1* between the first and second time point.

**Supplemental Figure S10**: Heritability of the change for the 1000 genes with the least evidence of being affected by a time-dependent cis-eQTL and for the top 1000 genes with the most evidence (**A**). Genetic correlation for the 1000 genes with the least evidence of being affected by a time-dependent cis-eQTL and for the top 1000 genes with the most evidence (**B**).

**Supplemental Figure S11:** Functional enrichment of the 1000 SNPs with the most evidence of regulating gene expression differently between time points versus SNPs matched for distance to closest transcription start site and minor allele frequency. The absolute value of the log10 of the enrichment pvalue is shown on top of the bars and fold enrichment in shown at the bottom of the bars.

**Supplemental Tables legend:**

**Supplemental Table S1:** Summary statistics for all genes (differential expression, putative causal genes, pvalue in cross-sectional study of aging (Peters et al. 2015), heritability at both time points, heritability of the change, correlation, genetic correlation, common environment correlation, unique environment correlation, SNP-time point interaction).

**Supplemental Table S2:** Pathway enrichment analysis of genes affected by a correlated effect of the unique environment on their expression (ρE >0.5).

**Supplemental Table S3**: Pathway enrichment analysis of genes differentially expressed, putative causal genes, genes with genetic correlation smaller than 1, genes that gained or lost heritability between the two time points and genes with significant heritability of the change.
