# Supplementary material for: Time-dependent genetic effects on gene expression implicate aging processes
Source: HighWire-hosted journal article supplement (doi:10.1101/gr.207688.116), 2017-03-16
Supplement: Supplemental_Methods.docx [file Supplemental_Methods.docx]

**Supplementary Methods**

**Time-dependent genetic effects on gene expression implicate aging processes**

Julien Bryois1,2,3, Alfonso Buil1,2,3, Pedro G. Ferreira1,2,3, Nikolaos I Panousis1,2,3, Andrew A. Brown1,2,3, Ana Viñuela1,2,3,4,Alexandra Planchon1,2,3, Deborah Bielser1,2,3, Kerrin Small4, Tim Spector4, Emmanouil T. Dermitzakis1,2,3,*

**Table of Contents:**

1. Effect of potential covariates on the differential expression analysis (page 2-3)

- Time of sampling during the day

- Season

- RNA quality (RIN)

2) Permutations versus eigenMT for the time-dependent cis-eQTL analysis (page 4)

**Effect of potential covariates on the differential expression analysis**

Time of sampling during the day:

We compared the effect of the time between the two time points on gene expression with and without correcting for the sampling time during the day (8:30-14:00). We observed very strong correlation for all genes (r=0.98, **Supplementary Methods Figure 1 left)** as well as for the 2213 genes that we found differentially expressed between time points (r=1**, Supplementary Methods Figure 1 right)**, indicating that the sampling time during the day has little effects on our results.

**Supplementary Methods Figure 1:** Correlation between effect of time point on gene expression corrected for time of the day vs not corrected for time of the day for all genes (left) and for the 2213 genes detected to be differentially expressed without correcting for time of the day (right).

Season:

We also recorded the day of the sampling and used it to estimate the effect of the season on gene expression. We observed 4 genes differentially expressed in function of the season (5% FDR). Correcting for the season in the time differential expression analysis did not substantially affect our results, hence season was not used as a covariate in our differential expression analysis.

RNA quality:

RNA quality was slightly lower at the second time point (median=7.6) compared with the first time point (median=8.5). We compared the effect size of time on gene expression with and without correcting for RIN. We observed that the beta coefficients were highly correlated across all genes (r=0.85, **Supplementary Methods Figure 2 left**) and to a larger extent for the 2213 differentially expressed genes (r=0.96, **Supplementary Methods Figure 2 right**). This analysis indicates that difference in RNA quality between the two time points has little effects on our results.

**Supplementary Methods Figure 2:** Correlation between effect of time point on gene expression corrected for RIN vs not corrected for RIN for all genes (left) and for the 2213 genes detected to be differentially expressed without correcting for RIN (right).

**Permutations versus eigenMT for the time-dependent cis-eQTL analysis**

Because of the relatedness of the samples and the longitudinal data, we had to use linear mixed models to test for SNP x time interactions. Mixed models fitting is computationally intensive which prevented us to do permutations. We used eigenMT (Davis et al. 2016) to estimate the number of independent tests performed in the 2MB window surrounding the transcriptional start site of each gene. The median number of estimated independent tests across genes was 1615, while there were a median number of 2005 SNPs tested in each window. In order to assess whether the method properly estimated the number of independent tests performed in each window, we compared the corrected pvalue using eigenMT with corrected pvalues using permutation in our cis-eQTL analysis at the first time point (unrelated individuals) and observed a very high correlation (r= 0.98, **Supplementary Methods Figure 3**). This indicates that eigenMT accurately estimates the number of independent tests and that correcting our SNP x time interaction pvalues by the estimated number of independent tests is adequate.

**Supplementary Methods Figure 3:** Correlation of the gene level permutation pvalue with pvalues corrected using the estimated number of independent tests by eigenMT for eQTL detected at the first time point in unrelated individuals.
