# Supplementary material for: Time-dependent genetic effects on gene expression implicate aging processes
Source: HighWire-hosted journal article supplement (doi:10.1101/gr.207688.116), 2017-03-16
Supplement: Supplemental_Table_S1.xlsx [file Supplemental_Table_S1.xlsx]

## Sheet: result_summary_GR_revision
Supplemental Table S1: Summary statistics for all genes (differential expression, putative causal genes, pvalue in cross-sectional study of aging (Peters et al. 2015), heritability at both time points, heritability of the change, correlation, genetic correlation, common environment correlation, unique environment correlation, SNP-time point interaction).
Ensembl_gene_ID	HGNC_symbol	Median_RPKM	Var_RPKM	TP_direction	TP_pvalue	TP_UP_1FDR	TP_DOWN_1FDR	TP_more_40FDR	primary_causal	number_of_genes_affected	Age_direction_this_study	Age_direction_Peters	Age_pvalue_Peters	h2_tp1	h2_tp1_95CI_lower	h2_tp1_95CI_upper	h2_tp2	h2_tp2_95CI_lower	h2_tp2_95CI_upper	h2_gain	h2_loss	h2_change	h2_change_95CI_lower	h2_change_95CI_upper	h2_change_significant	rho	rhog	rhog_95CI_lower	rhog_95CI_uper	rhoc	rhoc_95CI_lower	rhoc_95CI_uper	rhoe	rhoe_95CI_lower	rhoe_95CI_uper	rhog_less_1	SNP_TP_interaction_Top_snp	SNP_TP_interaction_adj_pvalue	SNP_TP_interaction_Top_1000	SNP_TP_interaction_Bottom_1000
ENSG00000185896.9	LAMP1	35.4986038250174	39.8929628531364	+	2.28339392574529e-13	TRUE	FALSE	FALSE	TRUE	1147	+	+	0.0182	0	0	0.537535776177872	0.409849234961773	0	0.839056148236331	FALSE	FALSE	0	0	0.183458095325788	FALSE	0.450402889691581	1	1	1	-1	-1	1	-0.179907949447813	-0.312491368255483	0.152701985116155	FALSE	rs7337905	1	FALSE	FALSE
ENSG00000163346.11	PBXIP1	136.495880597501	902.236951896972	+	9.66583219326187e-13	TRUE	FALSE	FALSE	TRUE	494	+	+	0.173	0	0	0.675965290360738	0.468507160028428	0	0.765390423003467	FALSE	FALSE	0	0	0.82096472094153	FALSE	0.577938316198944	1	0.831235902903477	1	0.236556454707845	-1	1	0.694282425063556	0.615357927696035	0.890622330912236	FALSE	rs11264305	1	FALSE	FALSE
ENSG00000136731.8	UGGT1	8.25714545374138	1.8178864511546	+	1.35903292692215e-11	TRUE	FALSE	FALSE	TRUE	655	+	+	0.294	0.0899571176278071	0	0.558876891936096	0.59741294987121	0.19284532290791	0.813270437465971	FALSE	FALSE	0.494274280155915	0	0.832679336865821	FALSE	0.272131147540984	0.182001452006572	-0.0533835599327999	1	0.0177228940702791	-0.313784026344234	1	0.358547627364376	0.212994756722575	0.610480323654572	FALSE	rs6706353	1	FALSE	FALSE
ENSG00000212802.3	RPL15P3	104.397030685241	1197.47953544118	-	1.90726071975382e-11	FALSE	TRUE	FALSE	TRUE	1282	-	NA	NA	0.609060583733603	0	0.71793599677084	0	0	0.453725951269535	FALSE	FALSE	0.0705490860525424	0	0.584105553886317	FALSE	0.228730202834121	1	0.764595152548282	1	0.209858395307266	-1	1	-0.0578146441331164	-0.237477285302174	0.218368516074547	FALSE	rs2496143	1	FALSE	FALSE
ENSG00000260539.1	NA	13.2521054259635	9.80758823780323	+	2.39990698657706e-11	TRUE	FALSE	FALSE	TRUE	619	+	NA	NA	0	0	0.611502487008697	0.32241346020876	0	0.56460507923966	FALSE	FALSE	0	0	0.464644413523506	FALSE	0.537760489024729	1	0.150714379748823	1	0.128839654954118	-1	1	0.526397267795535	0.46867590566928	0.776052132798172	FALSE	rs10781977	1	FALSE	FALSE
ENSG00000131469.8	RPL27	61.5018730058774	1747.81949467846	-	3.9843043398709e-11	FALSE	TRUE	FALSE	TRUE	1100	-	NA	NA	0.560947013465535	0.0185377002817113	0.76911613795659	0	0	0.534514938725676	FALSE	FALSE	0	0	0.304242505185201	FALSE	0.0432898027229786	1	1	1	-1	-1	0.827217095279835	-0.180774820267763	-0.5324251629738	0.248461868645238	FALSE	rs12600549	1	FALSE	FALSE
ENSG00000168958.15	MFF	4.27441025171066	0.855555524913296	-	4.03526741009149e-11	FALSE	TRUE	FALSE	TRUE	1811	-	-	0.00269	0.114316550068678	0	0.635372662741922	0	0	0.827039955190856	FALSE	FALSE	0	0	0.383379245798773	FALSE	0.00200055570991942	1	-0.675022964562298	1	-1	-1	1	0.039705410389779	-0.104256375626421	0.414029361450392	FALSE	rs10933171	1	FALSE	FALSE
ENSG00000182899.10	RPL35A	27.3871191919192	259.861140052738	-	9.42282900460615e-11	FALSE	TRUE	FALSE	TRUE	1138	-	-	7.36e-05	0.668286880904654	0.178047944379088	0.835094502942144	0	0	0.465114342313461	FALSE	TRUE	0.219314932482544	0	0.680725291800253	FALSE	0.0666851903306474	1	-0.383012781953441	1	-1	-1	-0.0581511848215737	0.0263103449523295	-0.158065534573184	0.337528349193822	FALSE	rs6809921	1	FALSE	FALSE
ENSG00000101161.6	PRPF6	39.6479757277539	62.2876157427797	+	1.04329811422762e-10	TRUE	FALSE	FALSE	FALSE	NA	+	-	0.541	0	0	0.48417692535236	0	0	0.335832616754141	FALSE	FALSE	0	0	0	FALSE	0.597277021394832	0.933200856075039	0.931968224339856	1	0.912921517783498	0.708674612682893	1	0.530670158518226	0.477853850357733	0.672210333109211	FALSE	rs2229205	1	FALSE	FALSE
ENSG00000005961.13	ITGA2B	7.35163301553672	33.2341071749398	+	1.24320585929484e-10	TRUE	FALSE	FALSE	TRUE	11	+	+	1.98e-13	0	0	0.45200539558711	0.329715393508988	0	0.876367044953432	FALSE	FALSE	0	0	0.525379153595555	FALSE	0.72570158377327	1	1	1	1	0.809681224470726	1	0.4052614261944	0.0687316460320669	0.764213917232188	FALSE	rs7222094	1	FALSE	FALSE
ENSG00000130312.2	MRPL34	11.0979546130952	7.36775505141317	-	1.33254473296024e-10	FALSE	TRUE	FALSE	TRUE	751	-	-	0.06	0.632018282214575	0.0123931373476001	0.813869272514293	0	0	0.405969293696449	FALSE	FALSE	0.464343374541902	0	0.620692917178398	FALSE	0.336760211169769	1	1	1	-0.0759276712385863	-1	1	0.15700512767774	0.00409076472280232	0.492198149084082	FALSE	rs10421434	0.653171350864306	TRUE	FALSE
ENSG00000183155.4	RABIF	7.83443610996705	1.37832002635115	-	1.41996144257353e-10	FALSE	TRUE	FALSE	TRUE	3	-	+	0.00481	0.275042866976487	0	0.596668389238461	0.242571917565104	0	0.668003399565145	FALSE	FALSE	0.335838618478908	0	0.63686035870597	FALSE	0.419672131147541	0.0740039497891165	-0.860777477933776	1	-0.00096415107636037	-0.9424951618717	1	0.353988734345317	0.191107178831162	0.613732497307723	FALSE	rs1417160	1	FALSE	FALSE
ENSG00000034152.14	MAP2K3	72.9158609481161	119.453849100243	+	1.45112061662905e-10	TRUE	FALSE	FALSE	FALSE	NA	-	+	0.000978	0.311077858855094	0	0.626632712607935	0.18730240733625	0	0.51446180014077	FALSE	FALSE	0	0	0.452012793612674	FALSE	0.50452903584329	1	0.981297309240133	1	-0.00946584081975637	-0.00157095352324871	1	0.267711987141852	0.181300097495548	0.546759428499754	FALSE	rs73309111	1	FALSE	TRUE
ENSG00000116030.12	SUMO1	11.450222737819	10.0395402189033	-	1.68990922782888e-10	FALSE	TRUE	FALSE	TRUE	1102	-	-	0.829	0.577923814687619	0	0.818842247434793	0.512845996974599	0	0.789806110804947	FALSE	FALSE	0.23522377814512	0	0.703585692411448	FALSE	0.0516810225062517	-0.0980556472593669	-0.543122577932488	1	-0.00469742900812518	-1	1	0.00965709771246605	-0.105315430508694	0.408678481891253	FALSE	rs1048829	1	TRUE	FALSE
ENSG00000175324.5	LSM1	3.41304866468843	1.85477249236805	-	2.08301742830427e-10	FALSE	TRUE	FALSE	TRUE	1221	-	+	0.972	0.378264241279113	0	0.62972891047272	0	0	0.374600482555423	FALSE	FALSE	0.311681842107876	0	0.585730943921035	FALSE	0.085968324534593	-1	-1	0.996171232757705	-1	-1	1	0.215581456011413	0.103683465575161	0.547031709001744	TRUE	rs7386256	1	FALSE	FALSE
ENSG00000197746.8	PSAP	761.589250700935	24067.6733842251	+	2.53802523390918e-10	TRUE	FALSE	FALSE	FALSE	NA	+	+	5.79e-06	0.0027103252258644	0	0.403290984692422	0	0	0.395212675274172	FALSE	FALSE	0	0	0.182263713377242	FALSE	0.467296471242012	1	0.999067240009743	1	0.584112585400216	0.508604408581274	1	-0.183677773979202	-0.383528013866075	0.135828229124213	FALSE	rs2394862	1	FALSE	FALSE
ENSG00000133112.12	TPT1	90.8994528137128	4155.77632613369	-	2.59370882419222e-10	FALSE	TRUE	FALSE	TRUE	1282	-	-	1.91e-08	0.528036358958052	0	0.752612811015648	0	0	0.404799331843966	FALSE	FALSE	0.0373239744841384	0	0.560865098832568	FALSE	0.279133092525702	1	-0.936112089074461	1	-1	-1	1	0.0311866052440082	-0.0738141062600372	0.364360103495418	FALSE	rs11843046	1	FALSE	FALSE
ENSG00000087365.9	SF3B2	26.4886039322944	23.3585344769043	+	3.58616639633505e-10	TRUE	FALSE	FALSE	FALSE	NA	+	-	0.00296	0	0	0.189120717214942	0.291336601054799	0	0.685703916436734	FALSE	FALSE	0	0	0.215198268225155	FALSE	0.556543484301195	1	0.969620768706819	1	0.895151370245661	0.432037018246052	1	0.364701938323052	0.285010599691574	0.611161950586827	FALSE	rs3759034	1	FALSE	FALSE
ENSG00000189043.5	NDUFA4	1.98685461841735	2.85352727236628	-	4.03378070045761e-10	FALSE	TRUE	FALSE	TRUE	758	+	+	0.000232	0.658884042824801	0	0.787776528667669	0	0	0.433734660293482	FALSE	FALSE	0	0	0.563233409823169	FALSE	0.248291191997777	1	1	1	-1	-1	1	-0.162398877373169	-0.377518095529168	0.159834910803912	FALSE	rs12533645	1	FALSE	FALSE
ENSG00000268279.1	NA	15.7284237531969	10.8589432099558	+	4.06047989969012e-10	TRUE	FALSE	FALSE	TRUE	191	+	NA	NA	0.545300622430338	0	0.734755186329218	0.251730471878939	0	0.600763913737551	FALSE	FALSE	0.534534248190202	0	0.827975846408203	FALSE	0.453792720200056	-0.19938042235804	-1	1	0.000124623345020448	-1	1	0.716725708843083	0.602173842980175	0.808214013090554	FALSE	rs1550158	0.920682844242139	TRUE	FALSE
ENSG00000120727.6	PAIP2	20.6485286111111	39.2075225016786	-	4.32445848311176e-10	FALSE	TRUE	FALSE	TRUE	787	-	-	0.0161	0.218908753378095	0	0.690839822931977	0	0	0.57933411148395	FALSE	FALSE	0	0	0.487765354529499	FALSE	0.170658516254515	1	-0.015850129088504	1	-0.0152883277122051	-0.744825779820943	1	0.105665122808751	-0.0205132054473358	0.593020527528418	FALSE	rs71592119	1	FALSE	FALSE
ENSG00000179818.7	PCBP1-AS1	16.7250121552025	4.06636809574239	+	4.34112595201114e-10	TRUE	FALSE	FALSE	TRUE	78	+	NA	NA	0.711367000984732	0.461450021106729	0.800122734595146	0.575854942540878	0.0463228843876541	0.786240880699065	FALSE	FALSE	0	0	0.305589843699065	FALSE	0.50452903584329	0.705197826390887	0.73777585950173	1	-0.0028013541887032	-1	1	-0.100144693933152	-0.289054131877785	0.353041522530042	FALSE	rs12987296	1	FALSE	FALSE
ENSG00000253304.1	TMEM200B	10.8378555924912	5.71322521479185	+	4.7577972961229e-10	TRUE	FALSE	FALSE	TRUE	174	+	NA	NA	0.100560352931455	0	0.560409527150651	0.325241747301451	0	0.488977622691278	FALSE	FALSE	0	0	0.307078311920436	FALSE	0.309752709085857	1	0.937565444116941	1	-1	-1	1	0.10098835306769	0.0432611642190511	0.426439449424151	FALSE	rs61765853	1	FALSE	FALSE
ENSG00000022840.9	RNF10	52.4526661357458	159.963535394751	+	4.91762028377333e-10	TRUE	FALSE	FALSE	FALSE	NA	-	+	0.000554	0.387112095425831	0	0.704464881822316	0.211198276230497	0	0.73654788596482	FALSE	FALSE	0.38563106583868	0	0.71384840815988	FALSE	0.647679911086413	0.279926266768752	0.539182906109972	1	1	0.00624242264789056	1	0.577695783631263	0.280762527842834	0.797083512084318	FALSE	rs76215734	1	FALSE	FALSE
ENSG00000115649.11	CNPPD1	51.4941957470011	51.0861094921297	+	5.07274762170449e-10	TRUE	FALSE	FALSE	TRUE	407	+	+	0.0308	0	0	0.564321039095538	0	0	0.260130941276462	FALSE	FALSE	0	0	0.582399858979699	FALSE	0.408391219783273	0.594614426878051	0.183415567819111	1	0.649670500542447	0.490447664604972	1	0.222812798582963	0.108989265041877	0.493904662539354	FALSE	rs10211319	1	FALSE	FALSE
ENSG00000143155.8	TIPRL	6.1106601519337	2.4506290621463	-	5.85567242993121e-10	FALSE	TRUE	FALSE	TRUE	880	-	+	0.0248	0.0965058069012831	0	0.507892361400465	0.335986261521203	0	0.600379534740332	FALSE	FALSE	0.34906668225322	0	0.516080756589475	FALSE	0.152264517921645	0.211268586310851	-0.0103656138104599	1	1	-0.00122663729278138	1	-0.0588716114155633	-0.170866743517916	0.320605883741613	FALSE	rs6701488	1	FALSE	FALSE
ENSG00000256206.2	NA	30.2714189412738	32.0824283150695	-	5.93912096291447e-10	FALSE	TRUE	FALSE	TRUE	654	-	NA	NA	0.669308667304613	0.0715584933939073	0.829848262441445	0.307028954270333	0	0.660309045721825	FALSE	FALSE	0.503884026249662	0	0.85004890108272	FALSE	0.182995276465685	-0.0888087702282543	-1	1	-1	-1	1	0.506007628231991	0.439130341283157	0.745028414438425	FALSE	rs756152	1	FALSE	FALSE
ENSG00000143612.13	C1orf43	30.3338857952325	26.2498942287428	-	7.40337899469139e-10	FALSE	TRUE	FALSE	TRUE	1105	-	+	0.000324	0.685360349926898	0.107812466660304	0.821050492637711	0	0	0.497463717707993	FALSE	FALSE	0.370270387564363	0	0.701329361028866	FALSE	0.130147263128647	-0.175446646533698	-1	1	-1	-1	1	0.191305927257389	-0.0415047632271765	0.499879611166307	FALSE	rs12129468	0.955667229483182	TRUE	FALSE
ENSG00000112335.10	SNX3	42.6222922563963	78.9303397461668	-	7.86635691228555e-10	FALSE	TRUE	FALSE	TRUE	789	-	+	0.472	0	0	0.476455658872853	0.543647722027671	0	0.820700603748252	FALSE	FALSE	0.293027454575873	0	0.590278367479613	FALSE	0.438677410391776	1	0.552088549969387	1	1	-0.0168844680718292	1	0.187347210515988	0.0130723365601326	0.464079635481519	FALSE	rs2806359	1	FALSE	FALSE
ENSG00000114942.9	EEF1B2	10.9191983368256	31.0786187342459	-	7.98531297928121e-10	FALSE	TRUE	FALSE	TRUE	782	-	-	1.11e-14	0.749574233580194	0.447718808106674	0.854173264355072	0	0	0.651867136061074	FALSE	TRUE	0.177137249935253	0	0.750718614557702	FALSE	0.170714087246457	1	1	1	-1	-1	-0.218439284091182	0.197003077036141	-0.0438024309814256	0.535233954787486	FALSE	rs6743779	1	TRUE	FALSE
ENSG00000118680.8	MYL12B	86.5282712250712	692.538574118155	-	8.62976878154011e-10	FALSE	TRUE	FALSE	TRUE	952	-	+	2.06e-05	0.122642116461472	0	0.67428161173452	0.26819893621006	0	0.767726052344985	FALSE	FALSE	0	0	0.411343151589029	FALSE	0.0489580439010836	1	0.311762174649458	1	-0.498187066252059	-1	0.309701636518517	-0.110012317565299	-0.207402636095723	0.58543294447311	FALSE	rs4798175	1	FALSE	FALSE
ENSG00000088986.6	DYNLL1	16.8400914830508	24.3436032197062	-	8.8617030562266e-10	FALSE	TRUE	FALSE	TRUE	766	-	+	0.326	0.576251177668255	0	0.772223774450254	0	0	0.37718750437222	FALSE	FALSE	0.034086179063113	0	0.524281128238448	FALSE	0.137816060016671	-0.274794692157082	-1	1	-1	-1	1	0.367842521482301	0.235213140848891	0.621673899651316	FALSE	rs2708104	1	FALSE	FALSE
ENSG00000184730.6	APOBR	124.92248029963	1042.45697082103	+	9.57446704830288e-10	TRUE	FALSE	FALSE	FALSE	NA	+	+	0.708	0.156819115479006	0	0.646786371476095	0	0	0.519204810639124	FALSE	FALSE	0	0	0.430244844013558	FALSE	0.403556543484301	1	1	1	0.113030101940933	-0.999820258257326	1	-0.0433413944930288	-0.181907451523575	0.274523721328151	FALSE	rs11648338	1	FALSE	FALSE
ENSG00000143933.11	CALM2	25.28446838009	49.0975953964107	-	9.59160172802661e-10	FALSE	TRUE	FALSE	TRUE	712	-	+	0.176	0	0	0.345162173338734	0	0	0	FALSE	FALSE	0	0	0.172350347635613	FALSE	0.066574048346763	0.668140134616806	0.454397004322307	1	0.285141620193467	-0.256370817569921	1	-0.0117795941760382	-0.113549671443337	0.283495547136527	FALSE	rs33931696	1	FALSE	FALSE
ENSG00000086666.14	ZFAND6	5.67937405959216	3.63474917595709	-	1.10631397523744e-09	FALSE	TRUE	FALSE	FALSE	NA	-	-	0.248	0.312480013854836	0	0.784444016878842	0	0	0.472746117609522	FALSE	FALSE	0	0	0.4889446075832	FALSE	0.372103362045013	1	1	1	0.287408823602993	-0.217897494931765	1	0.0380256875422669	-0.0810640829251183	0.385677115606239	FALSE	rs1037121	1	FALSE	FALSE
ENSG00000173418.7	NAA20	3.50048749472351	1.11485780141787	-	1.23712769535429e-09	FALSE	TRUE	FALSE	TRUE	874	-	-	3.57e-05	0.573215967055088	0.26093520802329	0.732173098343003	0	0	0.470269629559173	FALSE	TRUE	0.306805865443992	0	0.535845679217696	FALSE	0.0470686301750486	0.565285889291381	-1	1	1	-0.00336071759390935	1	-0.0873502416547837	-0.398673740890325	0.307192231735022	FALSE	rs2235895	1	FALSE	FALSE
ENSG00000171476.16	HOPX	4.78092177254098	7.10238953635339	-	1.3786657443375e-09	FALSE	TRUE	FALSE	FALSE	NA	-	+	1.27e-09	0.582423975164228	0	0.793293615380198	0.594127486464272	0	0.807357835305282	FALSE	FALSE	0	0	0.564869432762753	FALSE	0.602834120589053	0.829047642397495	0.69069250013632	1	1	0.00268061849882607	1	0.185335665941628	0.0338459892903942	0.456390284472168	FALSE	rs62310518	1	FALSE	FALSE
ENSG00000106803.5	SEC61B	28.4650622362869	43.4759660894632	-	1.51141529301951e-09	FALSE	TRUE	FALSE	TRUE	656	-	NA	NA	0.347206393299857	0	0.652429370248902	0	0	0.307864942281843	FALSE	FALSE	0.0723296391626678	0	0.627150186210677	FALSE	0.328146707418727	1	-0.984738476060658	1	-1	-1	1	0.202383367750635	-0.0111420083962509	0.485426754705347	FALSE	rs10985508	1	FALSE	FALSE
ENSG00000123975.4	CKS2	1.32780409836066	0.878864715081864	-	1.5348598530447e-09	FALSE	TRUE	FALSE	TRUE	369	-	-	0.313	0	0	0.577534728626952	0	0	0.350423530871013	FALSE	FALSE	0.367468159606298	0	0.661740904600488	FALSE	0.0465129202556266	-0.450559643705059	-1	1	0.0591688263365265	-0.130891322725022	1	-0.164124829958848	-0.236000225658698	0.139200087265552	FALSE	rs10820953	1	TRUE	FALSE
ENSG00000132432.9	SEC61G	6.02420413718018	5.9014572922766	-	1.81515376772854e-09	FALSE	TRUE	FALSE	TRUE	658	-	+	0.00118	0.571954116863023	0.0672268604204681	0.787100407745958	0.119814790028156	0	0.636218526574436	FALSE	FALSE	0	0	0.428018026257988	FALSE	0.126979716587941	1	1	1	-1	-1	0.48047139381729	-0.0224542292907601	-0.241709907474292	0.406604944546613	FALSE	rs77753751	0.653171350864306	TRUE	FALSE
ENSG00000254999.2	BRK1	59.7317680894309	204.526861595896	-	1.8414952263661e-09	FALSE	TRUE	FALSE	TRUE	864	-	+	0.465	0.676501033858232	0.253282135508956	0.867302719750658	0.11455022043301	0	0.584931396580596	FALSE	FALSE	0.157025314670091	0	0.72351097664752	FALSE	0.221728257849403	1	1	1	-1	-1	-0.00476437820309289	0.012367122717611	-0.133064301750119	0.404729905547407	FALSE	rs6442165	0.816432960229237	TRUE	FALSE
ENSG00000240376.1	NA	39.4266056926752	328.333933373998	-	1.91920747382279e-09	FALSE	TRUE	FALSE	TRUE	729	-	NA	NA	0.668142115205684	0.225799171254452	0.754204833718744	0	0	0	FALSE	TRUE	0.0901164845557102	0	0.549463039503188	FALSE	0.166101694915254	1	-0.980173289388543	1	-1	-1	-0.0043721143785318	0.333964713087562	0.177713195167251	0.642914984538873	FALSE	rs4866382	1	FALSE	FALSE
ENSG00000240395.1	RPL5P23	2.23124524221453	0.839061017341378	-	1.92275996737765e-09	FALSE	TRUE	FALSE	TRUE	347	-	NA	NA	0.106353888663947	0	0.587520902688536	0.209398485240785	0	0.458986011365712	FALSE	FALSE	0.381339309252548	0	0.664871437516595	FALSE	0.173714920811337	NA	-1	1	NA	-0.0038085552069994	1	NA	0.175349319043838	0.671061801906856	FALSE	rs75911341	1	FALSE	FALSE
ENSG00000163374.15	YY1AP1	19.2862222082748	4.55863019822009	+	2.42510670510145e-09	TRUE	FALSE	FALSE	FALSE	NA	+	+	0.0144	0	0	0.120963815055052	0.395018620467518	0	0.601014081041676	FALSE	FALSE	0	0	0.360790638528737	FALSE	0.179549874965268	1	0.532890644103213	1	1	-0.729295527718609	1	0.0900527975310941	-0.0053342016174874	0.35177050556537	FALSE	rs2842850	1	FALSE	FALSE
ENSG00000164758.3	MED30	5.0826598189415	1.9386635806426	-	2.79789731210344e-09	FALSE	TRUE	FALSE	TRUE	716	-	+	0.436	0.0146721799406135	0	0.586675368303877	0	0	0.733930807307648	FALSE	FALSE	0	0	0.0972897360203608	FALSE	0.198666296193387	1	-0.0205072580092107	1	-0.328652425598764	-1	0.791114959855375	0.0581532395393958	-0.104848789891059	0.486985332161534	FALSE	rs10110578	0.736322137253389	TRUE	FALSE
ENSG00000166710.12	B2M	842.725760976101	152546.004185462	-	2.82452113065451e-09	FALSE	TRUE	FALSE	TRUE	772	-	+	0.137	0.025614939807616	0	0.532126078744472	0	0	0.56334324621132	FALSE	FALSE	0	0	0.275749969567116	FALSE	0.0360100027785496	1	0.848100516289479	1	-0.763267973810284	-1	0.616732451361194	0.121726957889095	0.0092553360776248	0.495269927374616	FALSE	rs8023560	1	FALSE	FALSE
ENSG00000115128.6	SF3B6	8.39460236797988	12.4608523986921	-	2.85079734521412e-09	FALSE	TRUE	FALSE	TRUE	739	-	+	0.0133	0	0	0.473709350181263	0	0	0.43582200393759	FALSE	FALSE	0	0	0.454035552470873	FALSE	-0.0491247568769103	0.936281064847687	-0.349806969536483	1	-0.0691374341877871	-0.445475019837908	1	-0.0258772838245123	-0.176049303162536	0.279322500223874	FALSE	rs12478810	0.921047037817832	TRUE	FALSE
ENSG00000218283.2	MORF4L1P1	57.622314699793	98.9002890037168	-	2.93786157916523e-09	FALSE	TRUE	FALSE	TRUE	779	-	NA	NA	0.410517739999536	0.0282183106077975	0.681675532856454	0.570720478016001	0.0567233203140269	0.824980129901455	FALSE	FALSE	0.585913747783044	0	0.839500388799096	FALSE	0.162545151430953	-0.70802803268135	-1	1	0.00106380963772175	-0.000677248667916177	1	0.396629727245441	0.0440838442199233	0.753439297583002	FALSE	rs2494196	1	FALSE	FALSE
ENSG00000175467.10	SART1	25.0780208817379	22.5882879488982	+	3.03980607143583e-09	TRUE	FALSE	FALSE	FALSE	NA	+	-	0.728	0	0	0.320296112899176	0	0	0.439677113678129	FALSE	FALSE	0	0	0.0743680222982838	FALSE	0.527368713531537	1	0.748070532939991	1	0.00435456689707248	0.00393005346063455	1	0.354087488060336	0.235355216852349	0.626353572071048	FALSE	rs733303	1	FALSE	FALSE
ENSG00000152082.9	MZT2B	16.8108295328911	47.8102587199957	-	3.08550067592672e-09	FALSE	TRUE	FALSE	FALSE	NA	-	NA	NA	0.0102246136870198	0	0.540645384252142	0	0	0.396889687133773	FALSE	FALSE	0.264890291905066	0	0.545894772107239	FALSE	0.499694359544318	0.910193486085568	0.474087030140317	1	1	0.972153261273636	1	0.188750829511606	0.0729385535043897	0.3985099226951	FALSE	rs272137	1	FALSE	FALSE
ENSG00000160633.8	SAFB	20.2420965730977	8.93736222104245	+	3.25937612203156e-09	TRUE	FALSE	FALSE	TRUE	51	+	-	4.96e-07	0.0375261465073658	0	0.494752388368174	0	0	0.309842081940023	FALSE	FALSE	0.0109457677663037	0	0.44597288830695	FALSE	0.483023061961656	0.00853403726232603	-0.999999987922541	1	-0.0438346610599668	-1	1	0.419583233225576	0.361116335277708	0.620173315532135	FALSE	rs10422234	1	FALSE	FALSE
ENSG00000113068.5	PFDN1	9.48528514897579	3.42197817636946	-	3.36841353186693e-09	FALSE	TRUE	FALSE	TRUE	763	-	+	0.17	0.659599747083832	0.176883399982659	0.836060091078554	0	0	0.060644410136382	FALSE	TRUE	0	0	0.364049298343824	FALSE	0.390386218393998	1	-1	1	-1	-1	0.10211375475772	0.171443286710753	0.0166282669515029	0.470869727534666	FALSE	rs10900864	1	FALSE	FALSE
ENSG00000075624.9	ACTB	2787.73403262542	224276.169987562	+	3.88181218062477e-09	TRUE	FALSE	FALSE	FALSE	NA	+	+	0.0205	0.434664692811404	0	0.659124118614846	0	0	0.67818366889064	FALSE	FALSE	0	0	0.206956045881593	FALSE	0.444290080577938	1	1	1	1	0.00228060800165301	1	-0.169903413215864	-0.261587018526363	0.22698031391587	FALSE	rs62450800	1	FALSE	FALSE
ENSG00000136888.6	ATP6V1G1	24.0784155145929	111.283327821957	-	4.57807169815426e-09	FALSE	TRUE	FALSE	TRUE	1061	-	-	0.00577	0	0	0.627104415332437	0	0	0.228533225516025	FALSE	FALSE	0	0	0.45602621596416	FALSE	0.0813559322033899	1	-0.720658363906612	1	-0.719306582707011	-1	1	0.0765711279899624	-0.0457665007110553	0.436606401245415	FALSE	rs4979459	1	FALSE	FALSE
ENSG00000183291.11	NA	37.7405697563306	107.640247856708	-	5.18515841573379e-09	FALSE	TRUE	FALSE	TRUE	1064	-	-	0.505	0.244505485544658	0	0.64964800692253	0	0	0.0136127182977489	FALSE	FALSE	0	0	0.3028404981198	FALSE	0.179327590997499	1	1	1	-1	-1	1	-0.103877284454821	-0.257477129628171	0.22402610047808	FALSE	rs10782601	1	FALSE	FALSE
ENSG00000131171.8	SH3BGRL	48.8322491837179	129.256777782954	-	5.47857378454713e-09	FALSE	TRUE	FALSE	TRUE	532	-	-	0.0255	0.462816689637407	0	0.759418908833537	0	0	0.771339141810861	FALSE	FALSE	0	0	0.530742706215987	FALSE	0.211447624340095	1	0.985130916380932	1	-1	-1	1	-0.0232027498109264	-0.192166728697353	0.335199208836553	FALSE	NA	NA	FALSE	FALSE
ENSG00000115520.4	COQ10B	6.28448067010309	3.02748377069368	-	5.52140027847917e-09	FALSE	TRUE	FALSE	FALSE	NA	-	+	0.9	0.100218407026179	0	0.731588734503845	0	0	0.446032515859251	FALSE	FALSE	0	0	0.526972238175543	FALSE	0.155209780494582	1	0.750198177019457	1	0.0395467168867589	-0.963850695585696	1	-0.0252448400346145	-0.194096427768842	0.372023969185556	FALSE	rs2053394	1	FALSE	FALSE
ENSG00000163220.10	S100A9	4217.4611787892	4918683.33695479	-	5.5563800075137e-09	FALSE	TRUE	FALSE	TRUE	453	-	+	1.85e-14	0	0	0.338294228785877	0.247074081448067	0	0.700469693021613	FALSE	FALSE	0	0	0.51280480541265	FALSE	0.274576271186441	1	-0.260565850449033	1	0.24374456164614	-0.287472379689807	1	0.269968567337022	0.222480287741914	0.507969236102601	FALSE	rs10888541	1	FALSE	FALSE
ENSG00000100325.10	ASCC2	22.630555674618	39.3975086749326	+	5.59849092310457e-09	TRUE	FALSE	FALSE	FALSE	NA	+	-	0.0756	0.3902595665076	0	0.736075854545665	0.235808555622264	0	0.789388140737464	FALSE	FALSE	0	0	0	FALSE	0.31058627396499	1	1	1	-0.114745730671992	-1	0.692761020767433	0.343254210421246	0.0718008098829283	0.639540647223325	FALSE	rs1997719	1	FALSE	FALSE
ENSG00000145781.4	COMMD10	2.00187867346939	0.714788663349494	-	5.7581976813308e-09	FALSE	TRUE	FALSE	FALSE	NA	-	-	0.687	0.452789118167689	0	0.660128563111642	0.468652137773217	0.0537972163655517	0.727139324698824	FALSE	FALSE	0.0750589075550734	0	0.755385072592085	FALSE	0.203223117532648	-0.276514531972368	-0.999999998104231	1	-0.0032573133329614	-1	0.00120122337495817	0.306167682036015	0.0923377340634922	0.691557021095615	FALSE	rs56371699	1	FALSE	FALSE
ENSG00000023572.4	GLRX2	1.5364067812983	0.288355432470245	-	6.08316855134875e-09	FALSE	TRUE	FALSE	TRUE	387	+	+	0.0741	0	0	0.371985639976949	0	0	0.273696469226655	FALSE	FALSE	0	0	0.288016737606058	FALSE	0.115254237288136	-0.289956846835283	-1	1	-1	-1	0.413383403283585	0.145894562161644	0.0684916453067799	0.381396425267933	FALSE	rs10801243	1	FALSE	FALSE
ENSG00000143158.6	MPC2	6.91752465618861	1.78677266589669	-	6.19964871821345e-09	FALSE	TRUE	FALSE	TRUE	650	-	+	0.0859	0.408901220099538	0	0.701017209216607	0.452938955169858	0	0.793413092590431	FALSE	FALSE	0.242810596164498	0	0.54583875142468	FALSE	0.0594053903862184	0.43669652307267	0.449984410340838	1	-0.00136781892008768	-1	1	-0.320749614446592	-0.526026839423816	0.121937966859644	FALSE	rs12088259	1	FALSE	FALSE
ENSG00000120742.6	SERP1	17.1118639808362	14.3771809776472	-	6.55311855448533e-09	FALSE	TRUE	FALSE	TRUE	750	-	+	0.0528	0	0	0.691130966693301	0	0	0.590826519034353	FALSE	FALSE	0	0	0.319623591210325	FALSE	0.376715754376216	0.977472296844448	0.835913051634018	1	0.528618490847147	0.0114579604593526	1	0.0827156781026101	-0.0311942696321598	0.243866198026171	FALSE	rs4681574	1	FALSE	FALSE
ENSG00000090863.7	GLG1	10.8278115552173	5.09142193774513	+	7.19225660329284e-09	TRUE	FALSE	FALSE	FALSE	NA	+	-	0.00588	0	0	0.216583944714129	0	0	0.674753522953034	FALSE	FALSE	0	0	0.22912955678631	FALSE	0.386218393998333	0.1273620593897	0.254719396427687	1	0.309564442888815	-0.119133959888259	1	0.277204809478641	0.199227852000892	0.540629876235184	FALSE	rs11149775	1	FALSE	FALSE
ENSG00000167863.7	ATP5H	38.430718901454	185.510388936633	-	7.61547623653535e-09	FALSE	TRUE	FALSE	TRUE	631	+	-	0.00686	0.63079874945879	0.267338565452339	0.789147528237321	0	0	0.516324329031612	FALSE	FALSE	0	0	0.280374406809568	FALSE	0.108252292303418	1	0.756924863089556	1	-1	-1	-0.272123945627581	0.0507394703215747	-0.132695512225505	0.391305438602301	FALSE	rs2293190	0.90539067036847	TRUE	FALSE
ENSG00000198258.6	UBL5	21.4449109828838	62.876407501634	-	7.82242059895293e-09	FALSE	TRUE	FALSE	TRUE	511	-	+	0.0152	0.514929988787182	0.0336701791304659	0.741204880221864	0	0	0.118906758762361	FALSE	TRUE	0	0	0.501649611129484	FALSE	0.135315365379272	1	-1	1	-0.129107209201631	-1	1	-0.183688429258999	-0.299998574645084	0.164219466717177	FALSE	rs1435	1	FALSE	FALSE
ENSG00000117118.5	SDHB	17.754978376173	9.33322542257524	-	7.89270738840434e-09	FALSE	TRUE	FALSE	FALSE	NA	-	+	0.555	0.55779025919467	0.18432123476658	0.747869159196939	0	0	0.682487450696753	FALSE	FALSE	0	0	0.526032408061975	FALSE	0.194831897749375	1	1	1	-1	-1	0.0476392528229771	0.154606670407595	0.0273998223803688	0.558380323030468	FALSE	rs2977269	1	FALSE	FALSE
ENSG00000116350.10	SRSF4	35.0076886837121	26.6828072229577	+	8.261706885529e-09	TRUE	FALSE	FALSE	FALSE	NA	+	-	0.473	0.225462361911123	0	0.666903186161673	0.342389496483798	0	0.694843274265362	FALSE	FALSE	0	0	0.778812630365045	FALSE	0.41839399833287	-0.420507750360588	-0.999825519597551	1	-1	-1	1	0.48584238157749	0.403880040286048	0.611407740434708	FALSE	rs6671744	1	FALSE	FALSE
ENSG00000256646.3	NA	7.18538440156965	4.81444263722909	-	9.17589378904156e-09	FALSE	TRUE	FALSE	TRUE	734	-	NA	NA	0.50151635954805	0	0.751655291027417	0.0945275165087364	0	0.716957504410603	FALSE	FALSE	0.210472449647382	0	0.71395871609686	FALSE	0.213281467074187	0.203489215189149	-0.859167912070476	1	-1	-1	1	0.273917956149308	0.161028988971325	0.556785218163215	FALSE	rs846400	1	FALSE	FALSE
ENSG00000127540.5	UQCR11	12.9063241367242	20.095457006553	-	9.40224450185161e-09	FALSE	TRUE	FALSE	FALSE	NA	+	-	0.00968	0.0109286969978295	0	0.532876475609983	0	0	0.275551420209957	FALSE	FALSE	0	0	0.401690119847727	FALSE	0.178994165045846	1	1	1	-0.199906915662761	-0.547108006097938	0.721372700005143	-0.0950588733699178	-0.220741910861126	0.241512374131779	FALSE	rs58491369	1	FALSE	FALSE
ENSG00000133773.7	CCDC59	2.05524827357238	0.406686969351292	-	1.02004018103656e-08	FALSE	TRUE	FALSE	TRUE	624	-	-	1.67e-07	0.516180450760886	0	0.834607403314019	0	0	0.376048331714397	FALSE	FALSE	0.302712945860669	0	0.555270574068346	FALSE	0.212948041122534	1	-1	1	1	-0.00143415718182454	1	0.0741205699909591	-0.0167574343898101	0.43645471558566	FALSE	rs11114962	1	FALSE	FALSE
ENSG00000111775.2	COX6A1	15.1196689970172	18.6494596936812	-	1.02882922888904e-08	FALSE	TRUE	FALSE	TRUE	558	-	NA	NA	0.665947664345083	0	0.845005155841481	0	0	0.557225919030929	FALSE	FALSE	0	0	0.457429663838055	FALSE	0.237232564601278	NA	1	1	NA	-1	1	NA	0.123969474134277	0.492851801463169	FALSE	rs61946385	1	FALSE	FALSE
ENSG00000188612.7	SUMO2	27.3573512957317	43.1119788260198	-	1.08368308061349e-08	FALSE	TRUE	FALSE	TRUE	762	-	-	0.367	0.763569702946485	0.279211854503177	0.913756530032191	0	0	0.471315986069904	FALSE	TRUE	0.471696763810011	0	0.770491983359048	FALSE	-0.140983606557377	1	-0.212165306765502	1	-1	-1	1	-0.0816334184120802	-0.25259440132019	0.372850670868191	FALSE	rs2670838	0.446392251264796	TRUE	FALSE
ENSG00000230989.2	HSBP1	3.55758651723292	0.711012010861996	-	1.13697836053161e-08	FALSE	TRUE	FALSE	FALSE	NA	-	+	0.0423	0	0	0.511529910811946	0	0	0.259959831375721	FALSE	FALSE	0	0	0.803529642905503	FALSE	0.187107529869408	NA	-1	1	NA	-0.0899971741825437	1	NA	-0.113354913590968	0.53509512623286	FALSE	rs58528224	1	FALSE	FALSE
ENSG00000178977.3	LINC00324	6.44513858826359	1.43214633363317	-	1.15525216753785e-08	FALSE	TRUE	FALSE	FALSE	NA	+	+	1.33e-07	0.420715719596709	0	0.707012011735527	0	0	0.0264981305621672	FALSE	FALSE	0.475868948324447	0	0.706663782181564	FALSE	0.465796054459572	-1	-1	1	1	0.600702344334631	1	0.354467723173337	0.240092141382134	0.689688232440503	FALSE	rs56142945	1	FALSE	FALSE
ENSG00000100528.7	CNIH1	7.51239005664878	7.13308278897167	-	1.20824344593423e-08	FALSE	TRUE	FALSE	TRUE	736	-	-	6.44e-05	0	0	0.551143635758539	0	0	0.175355239101495	FALSE	FALSE	0.208050023069129	0	0.587946214502451	FALSE	0.320088913587108	-0.192204331004635	-1	1	0.028645144843957	-1	1	0.273919929584653	0.165929871549799	0.610169783880757	FALSE	rs4901425	1	FALSE	FALSE
ENSG00000214389.2	RPS3AP26	7.46025702426564	118.970748970112	-	1.22882195483184e-08	FALSE	TRUE	FALSE	TRUE	627	-	NA	NA	0.40707451057126	0	0.734095885680615	0.166582277247713	0	0.520309327042297	FALSE	FALSE	0.264968222234877	0	0.704813142750566	FALSE	0.291247568769103	-0.212881265385269	-1	1	0.062865562634686	-1	1	0.193056349251668	0.0525203131589356	0.480116544432283	FALSE	rs10237699	1	FALSE	FALSE
ENSG00000185019.12	UBOX5	6.53526357776838	1.25827012300064	+	1.26973470114236e-08	TRUE	FALSE	FALSE	TRUE	28	+	+	0.000156	0.209262525455357	0	0.681838936944164	0	0	0.332471108423007	FALSE	FALSE	0	0	0	FALSE	0.415726590719644	0.999044227981064	0.833846675434215	1	0.549440996932681	0.00574006693133134	1	0.176738479984319	0.00958229293873109	0.538585830862733	FALSE	rs41530048	1	FALSE	FALSE
ENSG00000172428.5	COPS9	3.80043125922282	3.0933901812633	-	1.33115481881935e-08	FALSE	TRUE	FALSE	TRUE	607	-	NA	NA	0.542095736823937	0.104509677091872	0.822644652763418	0	0	0.571082997077542	FALSE	FALSE	0.332251202143381	0	0.701042307081985	FALSE	0.15843289802723	-1	-1	1	-1	-1	1	0.171075007599259	0.0285981318152665	0.453352666998671	FALSE	rs3791554	1	TRUE	FALSE
ENSG00000136942.9	RPL35	48.8571911332462	516.446045734331	-	1.37731547041917e-08	FALSE	TRUE	FALSE	TRUE	546	-	-	2.7e-07	0.587312861521126	0.145120972055521	0.724020583185892	0	0	0.62236389798258	FALSE	FALSE	0	0	0.536309089242254	FALSE	0.176993609335927	1	-1	1	-1	-1	1	0.0601441368472021	-0.171338204757724	0.394852416836997	FALSE	rs2638378	0.942150978931498	TRUE	FALSE
ENSG00000181817.5	LSM10	27.5360346849866	41.4723578652584	-	1.40220979618116e-08	FALSE	TRUE	FALSE	FALSE	NA	+	+	6.84e-06	0.15128050207976	0	0.662684225336978	0	0	0.398622770115234	FALSE	FALSE	0.0697546774905934	0	0.66161674584482	FALSE	0.175048624617949	-1	-1	1	-0.0214811309570908	-0.174296758792414	1	0.318389138998446	0.223765037796927	0.528399834540947	FALSE	rs11263884	1	FALSE	FALSE
ENSG00000255927.1	NA	9.29061254882813	7.47981346214213	-	1.40655676938737e-08	FALSE	TRUE	FALSE	FALSE	NA	+	NA	NA	0.313107725208538	0	0.607297074699409	0	0	0.431819406584357	FALSE	FALSE	0	0	0.401684915168374	FALSE	0.184717977215893	1	0.427060394498784	1	-1	-1	1	0.0361892028340089	-0.201146968845522	0.402907664806851	FALSE	NA	NA	FALSE	FALSE
ENSG00000228532.2	NA	4.69363088812561	1.88497192912793	-	1.6231365461733e-08	FALSE	TRUE	FALSE	FALSE	NA	+	NA	NA	0.26489704711865	0	0.67263950731387	0	0	0.509734554141616	FALSE	FALSE	0	0	0.488523903761593	FALSE	0.179827729924979	1	0.689868368572235	1	-1	-1	1	0.0243646317301275	-0.235753203752809	0.414881468986423	FALSE	NA	NA	FALSE	FALSE
ENSG00000253356.1	NA	4.13114107142857	2.96263914795732	-	1.70354513867897e-08	FALSE	TRUE	FALSE	TRUE	661	-	NA	NA	0.313199047703342	0	0.725307678894644	0.0295498279418853	0	0.505977728576916	FALSE	FALSE	0.17567510853269	0	0.573282171752816	FALSE	-0.0327313142539594	-1	-1	1	-0.112924113234576	-0.992558655057662	1	-0.0774113789707966	-0.257026854388845	0.249397279926512	FALSE	rs881301	1	FALSE	FALSE
ENSG00000052749.9	RRP12	14.6062297976067	24.8159354586739	+	1.79448530340432e-08	TRUE	FALSE	FALSE	FALSE	NA	+	+	0.919	0.701172085335089	0.206775830262909	0.855483284752937	0	0	0.510280514931094	FALSE	FALSE	0	0	0.664250118276711	FALSE	0.688580161155877	1	1	1	1	0.90151846001399	1	0.174713701046416	0.0683878602426988	0.476210493649772	FALSE	rs2784913	1	FALSE	FALSE
ENSG00000129625.8	REEP5	14.8576018090154	13.1285371085678	-	1.81693119372057e-08	FALSE	TRUE	FALSE	FALSE	NA	-	+	6.15e-07	0.398160714498295	0	0.683406013050125	0.0232685382297202	0	0.816676671431964	FALSE	FALSE	0	0	0.606906194949319	FALSE	0.376215615448736	1	0.393820262933783	1	-0.0530036013581616	-0.225682750646374	1	0.0870845799749615	-0.000566197776806138	0.463442538591492	FALSE	rs11956757	1	FALSE	FALSE
ENSG00000106588.6	PSMA2	3.71270808284802	1.75298595153804	-	1.84334232696782e-08	FALSE	TRUE	FALSE	TRUE	808	-	+	0.701	0.56165534404633	0	0.778259825948293	0.0792827700343485	0	0.698263946180725	FALSE	FALSE	0	0	0.506096993595401	FALSE	0.216560155598777	-0.0134326414619276	-0.979205889409612	1	-0.500538187768408	-1	0.566859896007136	0.43494142899756	0.179941509737041	0.651097505061275	FALSE	rs2047916	1	FALSE	FALSE
ENSG00000103148.9	NPRL3	13.1977111853088	20.2208319375268	+	1.85477750700424e-08	TRUE	FALSE	FALSE	FALSE	NA	-	-	0.328	0.534831685908134	0	0.675932482157557	0.131496034552331	0	0.734557769189487	FALSE	FALSE	0	0	0.00320456292503317	FALSE	0.537816060016671	1	1	1	-1	-1	1	0.401469710236336	0.187175995134204	0.673663174252446	FALSE	rs7190878	0.700041765133989	TRUE	FALSE
ENSG00000111780.8	NA	7.8217081809872	4.62067922755668	-	1.98459439981769e-08	FALSE	TRUE	FALSE	FALSE	NA	-	NA	NA	0	0	0.346939423272846	0.238965882156963	0	0.471691702735395	FALSE	FALSE	0	0	0.593812419336667	FALSE	0.139260905807169	-1	-1	1	1	-0.00433478897215812	1	0.204787044283769	0.0482857138171773	0.588660327752245	FALSE	rs12299217	1	FALSE	FALSE
ENSG00000106153.12	CHCHD2	45.4167785904255	214.384448273278	-	2.17143683436289e-08	FALSE	TRUE	FALSE	FALSE	NA	-	+	0.323	0.75562535862158	0.332870894332808	0.858254438145029	0	0	0.40119023470624	FALSE	TRUE	0	0	0.49184520992407	FALSE	0.446179494303973	1	1	1	1	0.474573637901664	1	-0.139697304395465	-0.321828212345501	0.235399396148123	FALSE	rs10250208	0.653171350864306	TRUE	FALSE
ENSG00000236163.1	NA	10.0269311342593	4.83125946284638	+	2.32741768745587e-08	TRUE	FALSE	FALSE	TRUE	26	+	NA	NA	0.431860673949543	0	0.676841530613814	0	0	0.565718454936018	FALSE	FALSE	0	0	0.651268067154914	FALSE	0.289580439010836	-1	-1	1	1	0.00887786151767361	1	0.254435894938893	0.062437365631282	0.617537264515263	FALSE	rs12204413	1	FALSE	FALSE
ENSG00000214736.3	TOMM6	40.1291924290221	235.118844296986	-	2.33373294675861e-08	FALSE	TRUE	FALSE	TRUE	625	-	NA	NA	0.653102702392589	0.208467718030513	0.775390683378407	0	0	0.0261639872279983	FALSE	TRUE	0.00191492312958931	0	0.482532080508353	FALSE	0.048791330925257	-0.135749015492384	-1	1	-1	-1	0.160633377930534	0.0413572929753682	-0.102183467461336	0.27226031565147	FALSE	rs1041132	1	FALSE	FALSE
ENSG00000214753.2	HNRNPUL2	37.8405846590909	42.2102350017365	+	2.42978084897236e-08	TRUE	FALSE	FALSE	FALSE	NA	+	NA	NA	0	0	0.249715178805343	0	0	0.660273691503889	FALSE	FALSE	0	0	0	FALSE	0.400333425951653	0.992089759905209	0.8312258208043	1	0.558679667429698	0.36950982948653	1	0.296562172149271	0.22439626141615	0.493112416815505	FALSE	rs61896567	1	FALSE	FALSE
ENSG00000169442.4	CD52	127.377106223176	6293.24712679213	-	2.50711567893541e-08	FALSE	TRUE	FALSE	FALSE	NA	+	+	0.512	0.293250008117291	0	0.675525006925565	0	0	0.451320256998675	FALSE	FALSE	0	0	0.478591667119969	FALSE	0.411169769380384	1	0.20666514610261	1	0.334296176577883	0.297862007453196	1	-0.0371398268182603	-0.202596173833501	0.327210830563292	FALSE	rs807241	1	FALSE	FALSE
ENSG00000129084.13	PSMA1	14.8552402285637	7.76397790897218	-	2.7788242231783e-08	FALSE	TRUE	FALSE	TRUE	446	-	-	0.0769	0.676582560540156	0.165010758638247	0.839444067544883	0	0	0.681234228328588	FALSE	FALSE	0.0291444167434206	0	0.497824274022704	FALSE	0.148930258405113	-0.32409949664469	-0.999710198698886	1	-1	-1	0.977768354707929	0.382072588731429	0.280912666236541	0.5975031799313	FALSE	rs12272352	1	FALSE	FALSE
ENSG00000072786.7	STK10	68.282590448725	113.247313119649	+	2.78490911811044e-08	TRUE	FALSE	FALSE	FALSE	NA	+	+	0.00834	0.283779073466682	0	0.788922984590193	0	0	0.539568576224398	FALSE	FALSE	0	0	0.356630209652622	FALSE	0.447902195054182	1	1	1	-0.805804449943083	-1	1	0.0675409823901865	-0.0549019859646895	0.416083676692953	FALSE	rs793017	1	FALSE	FALSE
ENSG00000160445.6	ZER1	28.3214424247645	17.8768437995677	+	2.79762519329334e-08	TRUE	FALSE	FALSE	FALSE	NA	+	+	0.914	0.0596692979932396	0	0.675028855910397	0.28017005903321	0	0.543056735932137	FALSE	FALSE	0	0	0.223409471000806	FALSE	0.27429841622673	1	0.0427386010003752	1	-1	-1	1	0.215417222577657	0.0790783495512283	0.481608108881786	FALSE	rs1220665	1	FALSE	FALSE
ENSG00000142937.7	RPS8	92.1261006858952	1592.71962670936	-	2.8440482463671e-08	FALSE	TRUE	FALSE	TRUE	524	-	NA	NA	0.727348513558839	0.213905805394246	0.828709558204529	0	0	0.305466234505758	FALSE	TRUE	0.370025966365534	0	0.77748907907541	FALSE	0.19622117254793	1	-0.895981457134019	1	-1	-1	-0.179316478594108	0.290412887439118	0.169243560815174	0.576093475386996	FALSE	rs12749251	1	FALSE	FALSE
ENSG00000100532.7	CGRRF1	0.581575317382813	0.116645917869532	-	2.85474718609633e-08	FALSE	TRUE	FALSE	FALSE	NA	-	+	0.0818	0	0	0.57457173848859	0	0	0.102058983643266	FALSE	FALSE	0	0	0	FALSE	0.144706863017505	0.844899505949752	0.291128433783767	1	0.381925980234372	0.0548975439816504	1	-0.0824641957883983	-0.242651840162988	0.143934376377334	FALSE	rs74429240	1	FALSE	FALSE
ENSG00000204390.8	HSPA1L	4.09699041396414	0.517981919789465	+	3.02765720928479e-08	TRUE	FALSE	FALSE	FALSE	NA	+	+	0.0658	0.47883492514672	0	0.696345726461437	0	0	0.514482033565711	FALSE	FALSE	0	0	0.501374706122915	FALSE	0.285190330647402	1	0.570996868526493	1	0.469186574177236	-0.00231182274811359	1	-0.123286829436303	-0.26784642651992	0.339603349655209	FALSE	rs114840969	1	FALSE	FALSE
ENSG00000105058.7	FAM32A	33.0101761482255	27.3385212594834	-	3.09643604827189e-08	FALSE	TRUE	FALSE	TRUE	508	-	NA	NA	0	0	0.517301624550299	0	0	0.206188396216848	FALSE	FALSE	0	0	0	FALSE	0.208946929702695	1	0.0966876419609891	1	-0.35475563736959	-1	0.420070169699207	0.282132815911543	0.144086560259637	0.57492935750663	FALSE	rs11882503	1	FALSE	FALSE
ENSG00000009844.10	VTA1	4.51148022496372	2.03861127233052	-	3.28368268963468e-08	FALSE	TRUE	FALSE	FALSE	NA	-	-	0.672	0.635227384322692	0	0.816824908701398	0	0	0.521101490876549	FALSE	FALSE	0	0	0.301115561853439	FALSE	0.407001944984718	1	1	1	-1	-1	1	-0.0822854761356628	-0.275671276626461	0.307985392327305	FALSE	rs702293	1	FALSE	FALSE
ENSG00000124593.10	NA	6.40726966440822	4.28650634302041	-	3.31236235913208e-08	FALSE	TRUE	FALSE	TRUE	566	-	-	0.854	0.657261354024365	0.156740912399074	0.81138421277104	0	0	0.107734987411225	FALSE	TRUE	0	0	0.402018247200845	FALSE	0.0767991108641289	1	-1	1	-1	-1	1	0.060360958792568	-0.0558988283466058	0.320256081791572	FALSE	rs1041132	1	FALSE	FALSE
ENSG00000175061.10	LRRC75A-AS1	5.34311980578139	5.53466639874591	-	3.40844692819112e-08	FALSE	TRUE	FALSE	TRUE	464	-	NA	NA	0.469547574379	0	0.761506276835284	0.0505934202272572	0	0.448811094899074	FALSE	FALSE	0.289501984631612	0	0.558295662691614	FALSE	0.211947763267574	1	-0.996632042625507	1	-1	-1	1	0.0704328500935193	-0.148705511518679	0.375648451419014	FALSE	rs597985	1	FALSE	FALSE
ENSG00000087274.12	ADD1	23.772410849381	14.2983636479501	+	3.42305996180063e-08	TRUE	FALSE	FALSE	FALSE	NA	+	+	0.0148	0	0	0.432601842866227	0	0	0.667289373154331	FALSE	FALSE	0	0	0	FALSE	0.363045290358433	1	0.997942354405054	1	0.327336648168846	-1	1	0.248652223873551	0.144723044239274	0.453114401757755	FALSE	rs231332	1	FALSE	FALSE
ENSG00000126561.11	STAT5A	36.5256770462633	34.9394847996253	+	3.7063872968108e-08	TRUE	FALSE	FALSE	FALSE	NA	+	-	0.137	0.618602791177267	0	0.824290565338694	0.046236885810057	0	0.662994155867145	FALSE	FALSE	0	0	0.471326509889432	FALSE	0.59016393442623	1	1	1	-1	-1	1	-0.0345124136480747	-0.180974761922909	0.372203802625196	FALSE	rs7225519	1	FALSE	FALSE
ENSG00000099995.13	SF3A1	33.4310592230318	45.8054375998197	+	3.716715439046e-08	TRUE	FALSE	FALSE	FALSE	NA	+	-	0.19	0	0	0.603126407481748	0	0	0.541897400558326	FALSE	FALSE	0	0	0	FALSE	0.343206446235065	NA	0.599390077133092	1	NA	-0.0826602657547403	0.762040742231573	NA	-0.0653316581783787	0.360870771386455	FALSE	rs714456	1	FALSE	FALSE
ENSG00000049239.7	H6PD	13.9351170160228	9.18126098933997	+	3.72736028157103e-08	TRUE	FALSE	FALSE	FALSE	NA	+	+	0.0857	0.0517354955537275	0	0.59767637028068	0.524906998041082	0	0.782069757674968	FALSE	FALSE	0	0	0.36821653572901	FALSE	0.54887468741317	1	0.999999974793958	1	0.903376110066062	0.695600835793677	1	0.297974743087792	0.178939607193599	0.593413227332109	FALSE	rs299507	1	FALSE	FALSE
ENSG00000184182.14	UBE2F	6.41308752477701	1.76929659535864	-	3.75515054933714e-08	FALSE	TRUE	FALSE	FALSE	NA	-	+	7.15e-09	0.775093710794266	0.256546437595194	0.910915940352742	0.42982908939055	0	0.766148458372862	FALSE	FALSE	0	0	0.408497397205409	FALSE	0.441011392053348	1	1	1	-1	-1	1	0.293105431947397	0.00530374609581069	0.587025764357658	FALSE	rs11690679	1	FALSE	FALSE
ENSG00000148204.7	CRB2	0.730709208241238	0.0382158574313666	+	3.85266628763905e-08	TRUE	FALSE	FALSE	TRUE	97	+	NA	NA	0.0093734572881011	0	0.62720408646247	0.0831000936532312	0	0.543304614807739	FALSE	FALSE	0.332293834581283	0	0.617262476049057	FALSE	0.295582106140595	0.268672693915728	-1	1	0.483402819771852	0.0787842310395766	1	-0.0365676570822436	-0.161932405008318	0.333564562062768	FALSE	rs10986186	1	FALSE	FALSE
ENSG00000131504.11	DIAPH1	43.7082463506236	79.5946755049545	+	3.86413548258297e-08	TRUE	FALSE	FALSE	FALSE	NA	+	+	2.98e-09	0	0	0.479570524471401	0	0	0.725837114913797	FALSE	FALSE	0	0	0	FALSE	0.513809391497638	0.725265978819525	0.757639423801442	1	0.47965576899971	0.287462067157952	1	0.349112985455868	0.300750633326927	0.556198590036326	FALSE	rs252152	1	FALSE	FALSE
ENSG00000249758.1	NA	26.3527277190332	129.55422531151	-	3.93774895981426e-08	FALSE	TRUE	FALSE	FALSE	NA	-	NA	NA	0.331974423707374	0	0.690157002948559	0	0	0.367694861489794	FALSE	FALSE	0	0	0.517461873115601	FALSE	0.238677410391776	1	0.694224428078095	1	-0.108145327763551	-1	1	0.0577191587150072	-0.0877550562946877	0.499676533655727	FALSE	rs4835645	1	FALSE	FALSE
ENSG00000172660.7	NA	46.8274793106427	89.9487550729993	+	4.01339644866095e-08	TRUE	FALSE	FALSE	FALSE	NA	+	NA	NA	0	0	0.540392179081648	0.224537900710551	0	0.529271513186571	FALSE	FALSE	0	0	0.450749734724845	FALSE	0.537149208113365	-1	-0.999999431979576	1	1	-0.00849227916212028	1	0.441469794922176	0.37771123286937	0.569586616867113	FALSE	rs34253126	1	FALSE	FALSE
ENSG00000112695.7	COX7A2	7.67203014091858	11.4092934240562	-	4.06416458448051e-08	FALSE	TRUE	FALSE	FALSE	NA	-	+	0.00604	0	0	0.601843687383432	0	0	0	FALSE	FALSE	0	0	0	FALSE	0.028841344818005	1	0.999876385870793	1	-0.153461012262965	-0.982062304269449	1	-0.272075565627389	-0.407480342219405	0.152068473524921	FALSE	rs1767861	1	FALSE	FALSE
ENSG00000111642.9	CHD4	24.5496150793651	25.4360671107684	+	4.07109191403545e-08	TRUE	FALSE	FALSE	FALSE	NA	+	-	0.00885	0	0	0.452957626410571	0	0	0.665396060082665	FALSE	FALSE	0	0	0.00453058965049538	FALSE	0.407502083912198	0.978412397624567	0.0955145706703706	1	0.0310978539554477	-1	0.380590355232892	0.451489261331919	0.356750136061257	0.653198112232884	FALSE	rs2534719	1	FALSE	FALSE
ENSG00000135506.11	OS9	74.6750172998643	177.455361933558	+	4.09285286791256e-08	TRUE	FALSE	FALSE	FALSE	NA	+	+	0.00428	0	0	0.388236598187768	0	0	0.556278474305745	FALSE	FALSE	0	0	0.393712000165982	FALSE	0.461239233120311	1	0.951874444468586	1	0.805999246854137	0.215303728713448	1	-0.0771763244055668	-0.259049035749039	0.242924905594739	FALSE	rs11172278	1	FALSE	FALSE
ENSG00000123146.14	ADGRE5	180.503313083022	1976.69540688036	+	4.13146139675794e-08	TRUE	FALSE	FALSE	FALSE	NA	+	+	7.83e-12	0.640916458197392	0.177216491906401	0.832580337543142	0	0	0.374564046559269	FALSE	TRUE	0	0	0.478853629973775	FALSE	0.448235621005835	1	1	1	1	-0.108399414933149	1	0.15893800651626	0.0642814388116876	0.402633831895234	FALSE	rs7251278	1	FALSE	FALSE
ENSG00000004779.5	NDUFAB1	7.23895958882611	4.00095550091101	-	4.32128525345937e-08	FALSE	TRUE	FALSE	TRUE	524	-	-	0.0541	0.526847488987392	0	0.754562047818713	0	0	0.420245218667182	FALSE	FALSE	0.101104713363769	0	0.691643992971765	FALSE	0.214893025840511	-1	-1	0.491980945905187	-1	-1	1	0.489484095358374	0.39780500850193	0.652332896152339	TRUE	rs12931114	1	FALSE	FALSE
ENSG00000146109.3	ABT1	17.0202121447602	9.18008135358403	-	4.57086805341466e-08	FALSE	TRUE	FALSE	FALSE	NA	-	-	0.812	0.348851367178336	0	0.564337532652781	0	0	0.402959554030622	FALSE	FALSE	0	0	0.527285177630855	FALSE	0.4549041400389	1	-0.224906039106537	1	0.0553487360949509	-0.981316748874458	1	0.357262228703583	0.151219895335841	0.551188627528564	FALSE	rs9467547	0.869707987086912	TRUE	FALSE
ENSG00000256599.1	NA	39.65339123891	24.1866657611099	+	4.60992483861501e-08	TRUE	FALSE	FALSE	FALSE	NA	+	NA	NA	0	0	0.634232828107943	0.258836184749524	0	0.523081664849405	FALSE	FALSE	0	0	0.374148243494569	FALSE	0.210614059460961	1	0.911158462554344	1	1	-1	1	0.306761915909033	0.19581801018655	0.528089431553804	FALSE	rs741163	1	FALSE	FALSE
ENSG00000264112.1	NA	5.29065332989158	1.1088664815359	+	4.72554720471388e-08	TRUE	FALSE	FALSE	FALSE	NA	+	NA	NA	0	0	0.0199524368094333	0.151729769498634	0	0.56675894903819	FALSE	FALSE	0.367210541859026	0	0.815367848486519	FALSE	0.152264517921645	-0.424386220582365	-1	1	-1	-0.662970448081648	1	0.441202870595697	0.363821401205333	0.65897108986583	FALSE	rs8066028	1	FALSE	FALSE
ENSG00000155307.13	SAMSN1	4.52098532537606	6.09862507993372	-	4.79824712507018e-08	FALSE	TRUE	FALSE	FALSE	NA	-	+	7.33e-10	0	0	0.339548353327174	0.0383266171330393	0	0.675490629910228	FALSE	FALSE	0	0	0.181502965937497	FALSE	0.354820783550986	NA	0.727127074380477	1	NA	0.327949349164673	1	NA	-0.0871693804328496	0.33886950021142	FALSE	rs9977895	1	FALSE	FALSE
ENSG00000257342.1	NA	113.768722381636	723.409410651097	+	4.80910985184695e-08	TRUE	FALSE	FALSE	FALSE	NA	+	NA	NA	0.0898815796146778	0	0.788676046769072	0	0	0.549748340481137	FALSE	FALSE	0	0	0.626302023893103	FALSE	0.390386218393998	0.601612601733672	0.376720694273897	1	0.840010197978069	0.67867154809777	1	0.0260020532720184	-0.237246615651842	0.414443397856854	FALSE	rs2169988	1	FALSE	FALSE
ENSG00000156515.15	HK1	24.9829960686204	22.8532443312973	+	4.86705100432676e-08	TRUE	FALSE	FALSE	FALSE	NA	+	+	0.178	0	0	0.0608445111431662	0.144819054411467	0	0.743584956727226	FALSE	FALSE	0	0	0.30659281373845	FALSE	0.465573770491803	-1	-1	1	0.370119187039591	0.252930648428437	1	0.109843770696385	0.0506180277850984	0.478244940672807	FALSE	rs10823326	1	FALSE	FALSE
ENSG00000262160.1	NA	16.1231032745592	11.6014457872536	+	4.91865187015072e-08	TRUE	FALSE	FALSE	FALSE	NA	+	NA	NA	0	0	0.442214451484025	0.448714956384061	0	0.626639670675305	FALSE	FALSE	0.000874053510789915	0	0.556714821699312	FALSE	0.424562378438455	1	-0.291232612438021	1	-1	-1	1	0.538422639236865	0.463930031726625	0.714142484575334	FALSE	rs74635048	0.152371157550508	TRUE	FALSE
ENSG00000171858.13	RPS21	55.6964300245098	1186.12222868582	-	4.98630266349304e-08	FALSE	TRUE	FALSE	FALSE	NA	-	+	0.598	0.670950832948919	0.220456174062193	0.771598648511781	0	0	0.695275482774115	FALSE	FALSE	0.0417401453130106	0	0.47267561119584	FALSE	0.0902472909141428	1	-0.890743417590837	1	-1	-1	1	-0.0596260041957423	-0.282543854518249	0.329479238171328	FALSE	rs856943	1	FALSE	FALSE
ENSG00000134419.11	RPS15A	9.16396117977528	77.2837451468655	-	5.21497653303869e-08	FALSE	TRUE	FALSE	FALSE	NA	-	-	0.0104	0.530153111190927	0	0.7814132504266	0.0806799089024848	0	0.649664670166221	FALSE	FALSE	0	0	0.47426400072132	FALSE	0.405834954153932	1	1	1	-1	-1	1	-0.0700042315494626	-0.233476622641424	0.3328867574872	FALSE	rs62045178	1	FALSE	FALSE
ENSG00000169564.5	PCBP1	309.385502647395	1363.38086054698	+	5.78373717384713e-08	TRUE	FALSE	FALSE	FALSE	NA	-	-	0.0267	0.714929797777989	0.00653226110390082	0.841381901992182	0.691065158772248	0.260751641719269	0.866247983974219	FALSE	FALSE	0	0	0.659811988033653	FALSE	0.503473186996388	1	1	1	-1	-1	0.999979893047583	-0.182352550165959	-0.301396528288784	0.101312978052244	FALSE	rs11694045	1	FALSE	FALSE
ENSG00000213246.2	SUPT4H1	46.2728100649351	62.2984245067013	-	5.82340779066524e-08	FALSE	TRUE	FALSE	FALSE	NA	-	+	2.54e-09	0.0295788971407252	0	0.697160592707972	0.204506248886073	0	0.690843875483959	FALSE	FALSE	0	0	0.353367171693225	FALSE	0.347485412614615	1	0.54419407149347	1	-0.807036980672245	-1	1	0.320715522613153	0.222188317272076	0.77221149584213	FALSE	rs7226197	1	FALSE	FALSE
ENSG00000186517.9	ARHGAP30	191.079223456363	496.946145074674	+	6.43627305550653e-08	TRUE	FALSE	FALSE	FALSE	NA	+	+	0.000215	0	0	0.580335184891331	0	0	0.561801666733265	FALSE	FALSE	0	0	0.366111280077577	FALSE	0.334426229508197	1	0.981502489867083	1	0.808312107233232	0.00356145528179357	1	0.0350428631008972	-0.0621692223113683	0.300627300859035	FALSE	rs2262612	1	FALSE	FALSE
ENSG00000106263.13	EIF3B	12.1933496019817	6.05297530351653	+	7.61431546099438e-08	TRUE	FALSE	FALSE	FALSE	NA	+	-	1.14e-08	0	0	0.481319254645349	0	0	0.483103704127466	FALSE	FALSE	0	0	0.557452994690081	FALSE	0.591608780216727	0.707295182055914	0.289959589967183	1	0.61110185454826	0.445973716402334	1	0.484701567487794	0.421845091875582	0.659712068711856	FALSE	rs4722479	1	FALSE	FALSE
ENSG00000141376.16	BCAS3	3.3321419359218	0.319189060340959	+	7.6633560197998e-08	TRUE	FALSE	FALSE	FALSE	NA	+	+	0.193	0	0	0.612301772315517	0.16343872627049	0	0.73468253942239	FALSE	FALSE	0	0	0.558038475927094	FALSE	0.26373992775771	1	0.577938995513313	1	0.171727589247762	-0.637189557103798	1	0.040305163050618	-0.0667804994668201	0.306033588356607	FALSE	rs17601633	0.57931391376211	TRUE	FALSE
ENSG00000110700.2	RPS13	66.8244694660862	839.342714489591	-	7.70806279763447e-08	FALSE	TRUE	FALSE	FALSE	NA	-	-	1.36e-16	0.727988310743369	0.311060430335005	0.808613908074183	0	0	0.313846672245852	FALSE	TRUE	0.181896338065505	0	0.645493301565558	FALSE	0.0723534315087524	1	-0.675058078974078	1	-1	-1	-0.00523426828325158	0.1115595219011	-0.0987458904448388	0.434961729188961	FALSE	rs7936673	1	FALSE	FALSE
ENSG00000137154.8	RPS6	135.056613699262	6255.910361279	-	7.70925527189493e-08	FALSE	TRUE	FALSE	FALSE	NA	-	-	1.59e-23	0.782713614163844	0.315103358907559	0.881804026584848	0	0	0.336853233750213	FALSE	TRUE	0.301490484844864	0	0.706317057773059	FALSE	0.133036954709642	1	-0.984675926237803	1	-1	-1	1	0.129359183967175	-0.0430511197660043	0.383538595720224	FALSE	rs16936905	1	FALSE	FALSE
ENSG00000149806.6	FAU	79.6385215447154	864.772047815724	-	7.81891906618672e-08	FALSE	TRUE	FALSE	FALSE	NA	-	-	6.93e-05	0.531062052426578	0	0.713636893602117	0	0	0.586614249592442	FALSE	FALSE	0	0	0.436238727812492	FALSE	0.157654904140039	1	-1	1	-1	-1	1	-0.0444694933642129	-0.220167424683246	0.315440491599286	FALSE	rs1706936	1	FALSE	FALSE
ENSG00000100410.3	PHF5A	4.56064430894309	3.72758596119757	-	8.03673450798488e-08	FALSE	TRUE	FALSE	TRUE	822	-	-	0.0916	0	0	0.414068675159749	0	0	0.400448510533094	FALSE	FALSE	0	0	0.470517293383462	FALSE	0.292747985551542	1	0.670507518646945	1	0.175252447668981	-0.98693699805583	1	-0.182948811706273	-0.277685151540288	0.192030173614808	FALSE	rs148205431	1	FALSE	TRUE
ENSG00000183520.7	UTP11	2.91327032129109	0.401163792832355	-	8.48177468247203e-08	FALSE	TRUE	FALSE	FALSE	NA	-	-	0.00225	0.371347467481034	0	0.636951142578052	0	0	0.0219802133002417	FALSE	FALSE	0.498177216708829	0	0.698861126500569	FALSE	0.249791608780217	-1	-1	1	0.0104393151958472	-1	1	0.297401850059416	0.199842044682699	0.522237826865548	FALSE	rs2247976	1	FALSE	FALSE
ENSG00000182952.3	HMGN4	30.5578014303483	72.7484944698485	-	8.5120503616764e-08	FALSE	TRUE	FALSE	FALSE	NA	-	+	0.141	0.603755391115235	0.140186974339318	0.805935557721565	0	0	0.638303675091117	FALSE	FALSE	0	0	0.362400486172673	FALSE	0.426118366212837	1	1	1	-1	-1	1	-0.0608122503033298	-0.185186797047807	0.311905579226965	FALSE	rs9461366	1	FALSE	FALSE
ENSG00000162722.8	TRIM58	5.44994458682821	20.7429066132055	+	8.59800053674141e-08	TRUE	FALSE	FALSE	FALSE	NA	-	+	0.0382	0.414541621497939	0	0.689260275329533	0.175246266537692	0	0.832714657515767	FALSE	FALSE	0	0	0.445608674140711	FALSE	0.565434843011948	1	1	1	-1	-1	1	0.664221361984337	0.397488541708104	0.812164947073403	FALSE	rs2818893	1	FALSE	FALSE
ENSG00000232220.1	NA	134.061399346793	2288.53382636068	+	8.82353532599081e-08	TRUE	FALSE	FALSE	FALSE	NA	+	NA	NA	0.731579270885688	0.25729660567548	0.817686044932287	0.157210613152334	0	0.679591761235379	FALSE	FALSE	0	0	0.693125466325398	FALSE	0.499972214504029	1	1	1	0.0348742155900375	-1	1	0.338211231943608	0.247479893124025	0.743428213422946	FALSE	rs3844453	1	FALSE	FALSE
ENSG00000145287.6	PLAC8	16.5125837236534	20.3326013578405	-	9.01264366851206e-08	FALSE	TRUE	FALSE	FALSE	NA	-	-	3.34e-09	0.459041999853605	0	0.807552979459833	0	0	0.436419316553328	FALSE	FALSE	0	0	0.395531618073779	FALSE	0.208224506807447	-0.714726019220964	-1	1	-0.951180508456179	-1	0.787415550833024	0.463321007118779	0.323845238802766	0.609127267391644	FALSE	rs2868730	1	FALSE	FALSE
ENSG00000260342.2	NA	49.2236747027741	1376.63028073682	-	9.14990681975397e-08	FALSE	TRUE	FALSE	FALSE	NA	-	NA	NA	0.551265068768339	0	0.806201144785545	0.147847672015958	0	0.590661835083886	FALSE	FALSE	0	0	0.558777033635884	FALSE	0.404723534315088	1	0.899421970400446	1	-1	-1	1	-0.0789107937998618	-0.212430515981083	0.339090270789403	FALSE	rs11075392	1	FALSE	FALSE
ENSG00000115944.9	COX7A2L	5.40199781882809	2.52411303008078	-	9.31983174598994e-08	FALSE	TRUE	FALSE	TRUE	889	-	NA	NA	0.543643417225258	0	0.792007070647193	0	0	0.493327443467996	FALSE	FALSE	0.245379210894855	0	0.580288873821337	FALSE	0.287190886357321	1	-0.996086422834098	1	-1	-1	1	0.0136496256315487	-0.160135824777985	0.413494220032026	FALSE	rs4372955	1	FALSE	FALSE
ENSG00000241741.1	RPL7AP30	26.1344567610063	71.0669115664158	-	9.39699606409979e-08	FALSE	TRUE	FALSE	FALSE	NA	-	NA	NA	0.593098457627036	0	0.818551426060665	0	0	0.452262327842037	FALSE	FALSE	0.17567044810975	0	0.627983396604611	FALSE	0.238732981383718	1	-1	1	-1	-1	1	0.173021796280774	0.0384684969836819	0.507758106124305	FALSE	rs7654475	1	FALSE	FALSE
ENSG00000232888.3	RPS11P5	29.6264041237113	139.553924876789	-	9.42703785372469e-08	FALSE	TRUE	FALSE	FALSE	NA	-	NA	NA	0.615216321277502	0	0.834644166730311	0	0	0.278299418177852	FALSE	FALSE	0	0	0.448780708499954	FALSE	0.142206168380106	1	-0.350827353777168	1	-1	-1	1	0.00790871523890317	-0.0941271580174777	0.335143047051808	FALSE	rs12809570	1	FALSE	FALSE
ENSG00000104142.6	VPS18	13.6329664852832	5.86823603529453	+	1.03087533079558e-07	TRUE	FALSE	FALSE	FALSE	NA	+	+	4.61e-05	0	0	0.280191960747621	0.00538663517679431	0	0.605044893244044	FALSE	FALSE	0	0	0.417782603953025	FALSE	0.472686857460406	1	0.915302273544081	1	1	0.688086870164428	1	0.273629383887769	0.139232332298338	0.752095001051684	FALSE	rs35047458	1	FALSE	FALSE
ENSG00000184752.8	NDUFA12	10.7224266213969	12.4124225369996	-	1.05610696078823e-07	FALSE	TRUE	FALSE	FALSE	NA	-	-	0.00276	0.664809684709671	0	0.859440425586044	0.375047302597302	0	0.850689415352648	FALSE	FALSE	0.0991791690056739	0	0.730182325635619	FALSE	0.203667685468186	1	1	1	-1	-1	-0.00711279739892856	0.0774320704598545	-0.0267011752189456	0.40777973266794	FALSE	rs61937472	0.90539067036847	TRUE	FALSE
ENSG00000130175.5	PRKCSH	46.2866838477965	71.9076378870896	+	1.06478711967965e-07	TRUE	FALSE	FALSE	FALSE	NA	+	-	0.0177	0	0	0.148835511196746	0	0	0.525574881762781	FALSE	FALSE	0	0	0	FALSE	0.528757988330092	0.999989739693584	0.833209906529915	1	0.586791902578799	0.287935389764052	1	0.437706161665996	0.342632708861538	0.671920342165707	FALSE	rs11666754	1	FALSE	FALSE
ENSG00000175348.6	TMEM9B	12.4023383098822	6.20964106397383	-	1.09774692703656e-07	FALSE	TRUE	FALSE	FALSE	NA	-	+	0.272	0.762382095590595	0.32778406366755	0.875902332545763	0	0	0.166733026360266	FALSE	TRUE	0.265360757497126	0	0.609214307869701	FALSE	0.260794665184774	1	0.792669330345339	1	1	-1	1	0.146054112240084	0.030672242186227	0.576445812385297	FALSE	rs36206808	1	FALSE	FALSE
ENSG00000217555.7	CKLF	26.306540259009	90.8968247730221	-	1.1063385641497e-07	FALSE	TRUE	FALSE	FALSE	NA	-	+	2.54e-06	0	0	0.430823121415494	0	0	0.443101138870951	FALSE	FALSE	0	0	0.000843522242198834	FALSE	0.191275354265074	0.99332640599549	0.841518133301778	1	0.275781324153344	-0.419583821974841	1	0.205393134157124	0.0961666885460242	0.465833120240167	FALSE	rs35874313	1	FALSE	FALSE
ENSG00000198712.1	MT-CO2	3098.11667240117	937101.295269617	-	1.11299041387844e-07	FALSE	TRUE	FALSE	FALSE	NA	-	NA	NA	0.294335358005441	0	0.58958500978686	0	0	0.448682902490503	FALSE	FALSE	0.342882685768405	0	0.604417816782668	FALSE	0.31436510141706	0.365273514691806	-0.125463540893621	1	1	-0.00371604503601067	1	0.297203193379012	0.151342867639198	0.547441091970756	FALSE	NA	NA	FALSE	FALSE
ENSG00000117697.10	NSL1	3.9083579782023	1.37511176440471	-	1.14034951756649e-07	FALSE	TRUE	FALSE	FALSE	NA	-	+	0.0249	0.0695681386973829	0	0.542834111537269	0	0	0.521175881643474	FALSE	FALSE	0	0	0.0799357294602171	FALSE	0.198388441233676	1	1	1	-1	-1	1	-0.203552879853314	-0.314860584894286	0.139694569465485	FALSE	rs1877474	1	FALSE	TRUE
ENSG00000204389.6	HSPA1A	39.572468801398	119.352973140708	+	1.18998029819209e-07	TRUE	FALSE	FALSE	FALSE	NA	+	+	0.000445	0.772038854969878	0.138359688509015	0.85490939711773	0.126687008344359	0	0.652986963343381	FALSE	FALSE	0.117397579453959	0	0.429034307173387	FALSE	0.549652681300361	1	0.978032115821063	1	1	0.00188226156966396	1	-0.11160965181918	-0.222003162746617	0.16950408453453	FALSE	rs114353550	1	FALSE	FALSE
ENSG00000160789.15	LMNA	3.6574606676179	2.95410895318425	+	1.2158935172648e-07	TRUE	FALSE	FALSE	FALSE	NA	+	+	8.88e-16	0.661503633080609	0	0.920665460784418	0.138014303445046	0	0.748178021980207	FALSE	FALSE	0	0	0.544575091156358	FALSE	0.686690747429842	1	1	1	1	0.00793234937107694	1	0.283495846659059	0.170758202444785	0.600577322985961	FALSE	rs2066981	1	FALSE	FALSE
ENSG00000116260.12	QSOX1	10.1631911630283	4.69066914022681	+	1.23129533585761e-07	TRUE	FALSE	FALSE	FALSE	NA	+	+	1.89e-07	0.193801187790897	0	0.636047462226592	0.132064200855132	0	0.641269553337455	FALSE	FALSE	0	0	0.248565327930695	FALSE	0.503751041956099	1	1	1	1	0.00267625134914014	1	-0.219551645608712	-0.355261982294156	0.24250835763969	FALSE	rs6425523	1	FALSE	FALSE
ENSG00000267059.1	NA	18.8591021545942	18.6612484652421	-	1.31212450687537e-07	FALSE	TRUE	FALSE	FALSE	NA	-	NA	NA	0.359049155452356	0	0.677888239027537	0	0	0.322400221890323	FALSE	FALSE	0.00686161915935779	0	0.569776933598632	FALSE	0.276910252848013	-1	-1	1	0.175824414699287	-0.279880565920557	1	0.150307592347929	-0.0260391986812376	0.530609481591342	FALSE	rs4476281	1	FALSE	FALSE
ENSG00000167703.9	SLC43A2	86.8366363544746	319.297602484124	+	1.35657300544855e-07	TRUE	FALSE	FALSE	FALSE	NA	+	+	0.0761	0.584311770730423	0.200496980956003	0.763037777449315	0	0	0.523349737735661	FALSE	FALSE	0	0	0.341318612175282	FALSE	0.518477354820784	1	1	1	0.000195906186972278	-0.000637383821198179	1	0.113879789506821	-0.0383397671655225	0.42959795616382	FALSE	rs9908974	1	FALSE	FALSE
ENSG00000174748.13	RPL15	37.7175821998124	124.412402203058	-	1.42998233440984e-07	FALSE	TRUE	FALSE	FALSE	NA	-	-	0.00359	0.624770861813815	0.0234007843745351	0.727406390432579	0	0	0.144394684415097	FALSE	TRUE	0.0325774649928394	0	0.449578964252228	FALSE	0.292859127535427	-0.0521514759861383	-1	1	-1	-1	1	0.100143763437198	-0.0427790196406213	0.337523484524183	FALSE	rs7635692	1	FALSE	FALSE
ENSG00000143198.7	MGST3	2.8344941008153	0.724333515239026	-	1.48869783871163e-07	FALSE	TRUE	FALSE	FALSE	NA	-	+	8.66e-19	0.603679730070327	0.134620607160566	0.820475911627439	0.414091473624183	0.0106287137447747	0.780152230385526	FALSE	FALSE	0.332173933610001	0	0.737449622817313	FALSE	0.340983606557377	0.700603661176004	0.329959340771719	1	0.237604830852052	-0.10160847747722	1	0.0908502901591936	-0.155665114414886	0.5184102375728	FALSE	rs1891726	0.332336731321194	TRUE	FALSE
ENSG00000128590.4	DNAJB9	3.04431527875794	2.01275148662402	-	1.4958015221173e-07	FALSE	TRUE	FALSE	FALSE	NA	-	-	1.49e-09	0.427065035721244	0	0.793406297996546	0.407319796688877	0	0.748751987201199	FALSE	FALSE	0.213715155253432	0	0.623577637716247	FALSE	0.267685468185607	0.353186832195184	-0.0540547698484142	1	0.43600882944364	-0.143169988822072	1	0.16788923688931	-0.0103279589599874	0.505342738734285	FALSE	rs1269663	1	FALSE	FALSE
ENSG00000176340.3	COX8A	143.591452722772	1268.34486543172	-	1.4958779635277e-07	FALSE	TRUE	FALSE	FALSE	NA	-	+	1.86e-05	0.612747679452703	0.199769114312356	0.798257775608246	0	0	0.475498034784043	FALSE	FALSE	0.178779583538897	0	0.712537019186365	FALSE	0.360377882745207	1	1	1	-1	-1	1	0.0490538426286857	-0.141145234044522	0.425924779260788	FALSE	rs574250	1	FALSE	FALSE
ENSG00000149418.5	ST14	4.66557747252747	3.80976047165576	+	1.50796402615527e-07	TRUE	FALSE	FALSE	FALSE	NA	+	+	0.0666	0.827151174983494	0.117364244958115	0.904130806369392	0.833200765158368	0.552855138034064	0.897566113964588	FALSE	FALSE	0.391865091185163	0	0.724618216785224	FALSE	0.575715476521256	0.697157727040027	0.605691415148261	1	0.000903993099530073	-0.000954531547997882	1	0.0973413534066987	-0.118521041472384	0.621457689584308	FALSE	rs2307127	1	FALSE	FALSE
ENSG00000143553.6	SNAPIN	13.0122540531777	5.95312937483881	-	1.5515061505665e-07	FALSE	TRUE	FALSE	FALSE	NA	-	+	0.00585	0.494654685269957	0.0953130111965197	0.753214979172479	0	0	0.3831702704627	FALSE	FALSE	0.062331996271863	0	0.615294676429382	FALSE	0.334481800500139	1	0.236783969857404	1	-1	-1	1	0.154042961167002	-0.0358323159192023	0.42797023816514	FALSE	rs6667222	1	FALSE	FALSE
ENSG00000054118.9	THRAP3	35.8909250953188	43.9921261834434	+	1.56031084580453e-07	TRUE	FALSE	FALSE	FALSE	NA	+	+	0.677	0	0	0.411006087811256	0.448909451789218	0	0.80183420198271	FALSE	FALSE	0.129222882198208	0	0.656262727306624	FALSE	0.3304806890803	-0.217079877276124	-1	1	0.416479868563807	-0.474328880727093	1	0.394738872307787	0.364564536991589	0.564355033158666	FALSE	rs11588213	1	FALSE	FALSE
ENSG00000152133.9	GPATCH11	1.93524020094269	0.925815633394468	-	1.65182205334512e-07	FALSE	TRUE	FALSE	FALSE	NA	-	+	0.191	0.301420515450738	0	0.673570509484825	0.244323618701384	0	0.49680188547531	FALSE	FALSE	0	0	0.111920844024498	FALSE	0.202611836621284	1	0.779203778331641	1	-1	-1	1	0.0778373627682109	-0.00923080980011498	0.579010230601379	FALSE	rs1017154	1	FALSE	FALSE
ENSG00000144048.6	DUSP11	4.6323174900906	1.04105196264536	-	1.70217451867155e-07	FALSE	TRUE	FALSE	FALSE	NA	-	-	0.00234	0.190030556681467	0	0.644208045187796	0	0	0.460287950305802	FALSE	FALSE	0	0	0.45909394446674	FALSE	0.164101139205335	1	-0.108273457088496	1	0.0941246269918942	-0.687396655349091	1	-0.10065611154708	-0.296565691455087	0.307426303136433	FALSE	rs7585240	1	FALSE	FALSE
ENSG00000205542.6	TMSB4X	908.230720126248	37600.7514334055	-	1.75269906940555e-07	FALSE	TRUE	FALSE	FALSE	NA	-	+	0.226	0.559874404484092	0.330914955679309	0.747812250050509	0	0	0.162719098109793	FALSE	TRUE	0	0	0	FALSE	0.0475131981105863	1	1	1	-1	-1	0.699458781060183	-0.18275182590024	-0.335181390663394	0.155483719853485	FALSE	NA	NA	FALSE	FALSE
ENSG00000089280.14	FUS	43.6039835380239	72.7130804330195	+	1.75614045198924e-07	TRUE	FALSE	FALSE	FALSE	NA	+	-	0.000773	0.383750060458473	0	0.828698227619996	0	0	0.423305683671301	FALSE	FALSE	0	0	0.567367338034271	FALSE	0.427674353987219	1	-0.0373637931499854	1	0.317456055035017	-0.0802463303465042	1	0.471462418833022	0.393483286676845	0.671706152505545	FALSE	rs72785547	1	FALSE	FALSE
ENSG00000255072.1	PIGY	10.9068206018519	21.9351519941312	-	1.76616817372587e-07	FALSE	TRUE	FALSE	FALSE	NA	-	-	0.0437	0.140586472766401	0	0.710863878459215	0.346795534967733	0	0.604320386541679	FALSE	FALSE	0.00014134145364631	0	0.481845798849921	FALSE	0.0739094192831342	0.310757985242563	-0.34480278471874	1	0.108797172759557	-1	1	-0.0323216773703107	-0.122385095178533	0.293137580436145	FALSE	rs6822470	0.961332007625397	TRUE	FALSE
ENSG00000166145.9	SPINT1	8.2251661308359	5.09982001243289	+	1.77757778739849e-07	TRUE	FALSE	FALSE	FALSE	NA	+	+	3.71e-05	0	0	0.592058506554669	0.581101428827913	0	0.773588439171315	FALSE	FALSE	0	0	0.350690097041335	FALSE	0.583106418449569	1	1	1	1	0.00615814566730926	1	0.0669272617159324	-0.137913052289961	0.5049766237182	FALSE	rs12901700	1	FALSE	FALSE
ENSG00000160961.7	ZNF333	6.2413520570985	1.82332969152795	+	1.78359839348296e-07	TRUE	FALSE	FALSE	FALSE	NA	+	+	0.416	0.34061048240823	0	0.656384384845152	0.0894542351624194	0	0.547862487810161	FALSE	FALSE	0	0	0.524867923482722	FALSE	0.676632397888302	1	1	1	0.00261257251989102	0.00320397324219709	1	0.393982348495158	0.32591076809105	0.805165186446424	FALSE	rs10854145	1	FALSE	FALSE
ENSG00000173915.8	USMG5	7.57147169282511	7.39992510377868	-	1.82553358141309e-07	FALSE	TRUE	FALSE	FALSE	NA	-	+	0.389	0	0	0.390044688089978	0	0	0.328502861531142	FALSE	FALSE	0	0	0	FALSE	-0.0618505140316755	1	-0.559864564607632	1	-1	-1	1	-0.155748875795329	-0.274893684167013	0.153321661044057	FALSE	rs2863999	1	FALSE	FALSE
ENSG00000115561.10	CHMP3	8.58789244816371	3.32112577184547	-	2.01341768588785e-07	FALSE	TRUE	FALSE	FALSE	NA	-	+	0.0806	0	0	0.411237307507036	0	0	0.643325238876848	FALSE	FALSE	0	0	0.462250350162795	FALSE	0.348041122534037	0.969834944678554	0.987460879999141	1	0.398525537371422	-1	1	0.232718110099809	0.114419878084388	0.468393780547427	FALSE	rs61532327	1	FALSE	FALSE
ENSG00000174574.10	AKIRIN1	21.2168555829678	34.0126321863374	-	2.03258882430297e-07	FALSE	TRUE	FALSE	FALSE	NA	-	-	0.364	0	0	0	0	0	0.486714190962719	FALSE	FALSE	0	0	0	FALSE	0.1219227563212	0.284072459948238	0.170248167689629	1	0.261719468050818	0.0737285150560045	0.774075597425331	-0.00578985685037277	-0.104246097449797	0.241437611792001	FALSE	rs1180280	1	FALSE	FALSE
ENSG00000092820.13	EZR	55.9781740063234	204.854899899639	+	2.10761343990018e-07	TRUE	FALSE	FALSE	FALSE	NA	+	+	0.0915	0.172923175322128	0	0.721225322154973	0.159986562524349	0	0.648462057079581	FALSE	FALSE	0	0	0.374690338100682	FALSE	0.648235621005835	0.678951719103585	-0.0410090797881659	1	0.46832450169386	-0.375436825547347	1	0.523358016233857	0.44404855638062	0.718442496633594	FALSE	rs11756907	1	TRUE	FALSE
ENSG00000175857.4	GAPT	12.3970405963303	19.8070808376664	-	2.12168454405783e-07	FALSE	TRUE	FALSE	FALSE	NA	-	+	5.44e-05	0	0	0.477261528954741	0.0898404263430006	0	0.74932774488792	FALSE	FALSE	0.0397142948701781	0	0.529034180273949	FALSE	0.533425951653237	0.981410780234545	0.677530390694147	1	0.57478103857528	0.0114496682698434	1	0.562361203436039	0.353691470034929	0.723288772853973	FALSE	rs2041677	1	FALSE	FALSE
ENSG00000232472.1	EEF1B2P3	14.5161929468242	76.3271439961672	-	2.12852377278748e-07	FALSE	TRUE	FALSE	FALSE	NA	-	NA	NA	0.685658906441896	0.0146792518492571	0.857540041798703	0	0	0.330942127909854	FALSE	TRUE	0.0524262796961775	0	0.615007942425078	FALSE	0.167824395665463	1	0.181773558891403	1	-0.715368940629713	-1	1	-0.0600966001412256	-0.177791592912795	0.208616155843657	FALSE	NA	NA	FALSE	FALSE
ENSG00000254893.2	NA	7.22227962054724	10.15626071412	-	2.13556376502041e-07	FALSE	TRUE	FALSE	FALSE	NA	-	NA	NA	0.239265679904662	0	0.711496741373586	0.514899518597272	0	0.798695537393163	FALSE	FALSE	0	0	0.473796976925276	FALSE	0.239455404278966	1	1	1	-1	-1	1	-0.108821417501895	-0.199572258842929	0.173250541268802	FALSE	rs250735	1	FALSE	FALSE
ENSG00000187653.10	TMSB4XP8	321.252095914742	5809.26174572101	-	2.1755899353025e-07	FALSE	TRUE	FALSE	FALSE	NA	-	NA	NA	0.385341443815942	0	0.620953813878415	0	0	0.610455550926436	FALSE	FALSE	0	0	0	FALSE	0.0833564879133093	1	1	1	-1	-1	1	-0.293276254349474	-0.441076465830028	-0.00400052431476955	FALSE	rs4399947	1	FALSE	FALSE
ENSG00000122406.7	RPL5	90.0375842514865	1603.93520823151	-	2.22211204621455e-07	FALSE	TRUE	FALSE	FALSE	NA	-	-	3.61e-17	0.744135079301075	0.150225627459251	0.860610817267568	0	0	0.360228998914116	FALSE	TRUE	0.0459286151983091	0	0.603795625553612	FALSE	0.113531536537927	1	0.337251707017179	1	-1	-1	0.176288690752345	0.0239874321462919	-0.0985458643710062	0.302451475158121	FALSE	rs12240065	1	FALSE	FALSE
ENSG00000158769.11	F11R	41.9561312812813	61.5083049179238	+	2.30999226901776e-07	TRUE	FALSE	FALSE	FALSE	NA	+	+	0.0171	0.553533516068731	0.295322389639744	0.722080459289698	0.326921254567695	0	0.761797475500449	FALSE	FALSE	0	0	0.229639448350925	FALSE	0.599611003056405	1	0.964789646972392	1	-1	-1	1	0.268092866137337	0.101141886141633	0.659206200315984	FALSE	rs11265577	1	FALSE	FALSE
ENSG00000237190.3	CDKN2AIPNL	3.63572297490017	0.780367452632191	-	2.34386896656265e-07	FALSE	TRUE	FALSE	FALSE	NA	-	+	0.455	0.296584333134381	0	0.556659737881258	0	0	0.448812639327885	FALSE	FALSE	0.0878959549093772	0	0.514649761928966	FALSE	0.293248124479022	1	0.641369307454703	1	1	0.00372905575033873	1	-0.0977004486874738	-0.204578148213725	0.219839747396945	FALSE	rs1650465	1	FALSE	FALSE
ENSG00000204463.7	BAG6	56.8403615793935	79.8552513782568	+	2.46692529960129e-07	TRUE	FALSE	FALSE	FALSE	NA	+	+	0.514	0	0	0.461744560186917	0.231723519119014	0	0.678729607507596	FALSE	FALSE	0	0	0.2465972300648	FALSE	0.481800500138928	1	0.989611389384202	1	0.439658706032664	0.00254351394009278	1	0.186662650566648	0.0711138087801437	0.412978889193412	FALSE	rs115681968	1	FALSE	FALSE
ENSG00000165280.11	VCP	39.5815396302103	52.7146051566602	+	2.49594184535935e-07	TRUE	FALSE	FALSE	FALSE	NA	+	+	0.535	0	0	0	0.132703399898168	0	0.716819162598408	FALSE	FALSE	0	0	0	FALSE	0.523478744095582	0.987583847145495	0.938927113536624	1	0.954228973988383	0.78448135414595	1	0.0762164868266026	-0.00996737537315189	0.33975132366709	FALSE	rs10972672	1	TRUE	FALSE
ENSG00000172172.3	MRPL13	0.364277873631604	0.0588521800110613	-	2.65487250881692e-07	FALSE	TRUE	FALSE	FALSE	NA	+	-	0.0351	0	0	0.510199297114148	0	0	0.381073316092197	FALSE	FALSE	0.246472770534175	0	0.632875100944293	FALSE	0.201333703806613	-1	-1	1	1	-0.00884550212898984	1	0.0957263347105977	-0.0387794431652891	0.461286823766913	FALSE	rs10099729	1	FALSE	FALSE
ENSG00000129518.4	EAPP	12.8787686631944	11.7577756943819	-	2.84419584765167e-07	FALSE	TRUE	FALSE	FALSE	NA	-	+	0.723	0.612548391121992	0.019770302182718	0.72322693102911	0	0	0.55795376917999	FALSE	FALSE	0	0	0	FALSE	0.182661850514032	1	0.999195319587202	1	-1	-1	1	-0.226416580958274	-0.371895529218281	0.244029199402781	FALSE	rs11848040	0.134345240758478	TRUE	FALSE
ENSG00000165672.5	PRDX3	11.1079571114369	8.14585301469514	-	2.89456664357895e-07	FALSE	TRUE	FALSE	FALSE	NA	-	-	0.225	0	0	0.438724830369239	0	0	0.390674367146974	FALSE	FALSE	0	0	0.0431529476865376	FALSE	0.218060572381217	1	0.993780447630343	1	0.149434282082664	-0.273790012199747	0.582669250516148	0.0380009293842563	-0.130401016501327	0.224170583936459	FALSE	rs12783762	0.939128923802485	TRUE	FALSE
ENSG00000254788.1	CKLF-CMTM1	13.2745798726467	23.0457448918166	-	2.90725487721813e-07	FALSE	TRUE	FALSE	FALSE	NA	-	NA	NA	0	0	0.333169821615054	0	0	0.558761026802004	FALSE	FALSE	0	0	0.211490928157881	FALSE	0.162878577382606	0.00321228064671889	-0.999979648099705	1	0.0778011382922833	-0.835409076550948	1	0.153276157998372	0.0625219797056482	0.558766638838539	FALSE	rs35874313	1	FALSE	FALSE
ENSG00000117298.10	ECE1	34.596294734116	65.2983543731294	+	2.92042150746628e-07	TRUE	FALSE	FALSE	FALSE	NA	-	+	0.00499	0.461029982701973	0	0.65472127550687	0	0	0.331513261647217	FALSE	FALSE	0	0	0.449012857748857	FALSE	0.682578494026118	1	1	1	1	0.283320700611432	1	0.441987964022813	0.343943520471611	0.620400293993393	FALSE	rs2744726	1	FALSE	FALSE
ENSG00000166797.6	FAM96A	4.50643336776859	3.34129897427694	-	2.97249969520798e-07	FALSE	TRUE	FALSE	FALSE	NA	-	+	0.24	0.0107604720203496	0	0.626378752706558	0	0	0.401230055911892	FALSE	FALSE	0	0	0.661293901171566	FALSE	0.285801611558766	1	0.499341092444071	1	0.384438993838892	-0.686813869555594	1	0.127579612907288	-0.0110855270726666	0.403512767324128	FALSE	rs1994337	1	FALSE	FALSE
ENSG00000174109.3	C16orf91	2.55541211439589	0.468399424386777	-	3.02515251011899e-07	FALSE	TRUE	FALSE	FALSE	NA	-	NA	NA	0	0	0.487313424447379	0.166343228288174	0	0.467597765982879	FALSE	FALSE	0.282837733402275	0	0.670131956137479	FALSE	0.178105029174771	0.130806186371721	-1	1	1	0.26788957533105	1	0.0346276091036184	-0.11304558235587	0.50400332035904	FALSE	rs72764891	0.979972536376251	TRUE	FALSE
ENSG00000137364.4	TPMT	3.25145984394704	0.714113773249901	-	3.06061871109272e-07	FALSE	TRUE	FALSE	FALSE	NA	-	+	6.53e-05	0.507284282937979	0	0.848371454021696	0.157342461489067	0	0.610750301555305	FALSE	FALSE	0.0443002034767829	0	0.581553333282404	FALSE	0.324034454015004	1	0.995303019210014	1	0.0251874760087681	-1	1	0.207324460060103	0.0601558668643373	0.555205357663718	FALSE	rs6923060	1	FALSE	FALSE
ENSG00000103769.5	RAB11A	9.99350360979046	3.00262915313209	-	3.07894400792224e-07	FALSE	TRUE	FALSE	FALSE	NA	-	-	0.0533	0.355529834032044	0	0.622913431760362	0	0	0.204456386539735	FALSE	FALSE	0	0	0.333743618595373	FALSE	0.152709085857183	1	0.997527337610274	1	-1	-1	1	-0.00285099495863699	-0.119796004451149	0.330785280302153	FALSE	rs77976268	1	FALSE	FALSE
ENSG00000139437.13	TCHP	11.9868132608455	2.36029030685015	+	3.26781976502456e-07	TRUE	FALSE	FALSE	FALSE	NA	+	+	0.00374	0.164246156149753	0	0.582473805952073	0.44177954602794	0	0.735505980579177	FALSE	FALSE	0	0	0.468826511698247	FALSE	0.292081133648236	1	1	1	-1	-1	1	-0.131439655400801	-0.204699837908318	0.238786354247617	FALSE	rs7960944	1	FALSE	FALSE
ENSG00000215414.3	PSMA6P1	1.09752635135135	0.742607813059346	-	3.33225593756881e-07	FALSE	TRUE	FALSE	FALSE	NA	-	NA	NA	0.186713366249071	0	0.640985203217362	0.0973652615025119	0	0.454015786667766	FALSE	FALSE	0.337899673930967	0	0.828307031649392	FALSE	0.290414003889969	-1	-1	1	1	-1	1	0.471195048313631	0.251135350792381	0.784176396542812	FALSE	NA	NA	FALSE	FALSE
ENSG00000234797.4	RPS3AP6	5.26367832711443	49.9211097569397	-	3.35525017050065e-07	FALSE	TRUE	FALSE	FALSE	NA	-	NA	NA	0.42837200101401	0	0.728069572431906	0	0	0.529483937788578	FALSE	FALSE	0	0	0.585761226480897	FALSE	0.313420394554043	-0.189322497189083	-0.940136492810158	1	-1	-1	1	0.161246432357261	-0.0078403799488875	0.431322481943537	FALSE	rs56042992	1	FALSE	FALSE
ENSG00000130830.9	MPP1	25.8779779865395	22.969109828027	+	3.45693253270989e-07	TRUE	FALSE	FALSE	FALSE	NA	+	NA	NA	0	0	0.681299999832128	0.37087243934224	0	0.711903317825505	FALSE	FALSE	0	0	0.261084241778816	FALSE	0.450402889691581	1	1	1	-0.00719174096773599	-0.00219856203205019	1	0.128249541617379	-0.0177743814829511	0.321606313247492	FALSE	NA	NA	FALSE	FALSE
ENSG00000173221.9	GLRX	7.55951395939086	4.62036069662264	-	3.48611489513056e-07	FALSE	TRUE	FALSE	FALSE	NA	+	+	2.32e-06	0	0	0.321400830692422	0	0	0.339369154295423	FALSE	FALSE	0	0	0.100217112876364	FALSE	0.554820783550987	0.999994825717661	0.675868119641089	1	0.442917693914853	0.113413856814811	1	0.568160449284193	0.468444877929516	0.700821122234718	FALSE	rs7736961	1	FALSE	FALSE
ENSG00000108604.11	SMARCD2	47.8638014605978	46.9967365742787	+	3.5768229292265e-07	TRUE	FALSE	FALSE	FALSE	NA	+	+	0.728	0	0	0.662885586343231	0	0	0.482291444465949	FALSE	FALSE	0	0	0.430047461091907	FALSE	0.476743539872187	0.829326144564405	0.669360506662961	1	0.393918866344124	-0.414782123566304	1	0.385858263829304	0.290823169986418	0.711446608878034	FALSE	rs4968591	1	FALSE	FALSE
ENSG00000145337.4	PYURF	14.3122080573951	24.9454410101506	-	3.68148097872163e-07	FALSE	TRUE	FALSE	FALSE	NA	-	NA	NA	0.61508868691309	0	0.76218526527734	0.0662278887123604	0	0.659086598259834	FALSE	FALSE	0	0	0.508170547010006	FALSE	0.150597388163379	1	0.158402966413861	1	-1	-1	1	-0.0665909352460529	-0.169280603859555	0.326785854673856	FALSE	rs6532092	1	FALSE	FALSE
ENSG00000013364.14	MVP	83.4750967135382	208.244773729692	+	3.70175647981752e-07	TRUE	FALSE	FALSE	FALSE	NA	+	+	1.72e-09	0.412267220082263	0	0.730501344380787	0.38594487145556	0	0.786912112663879	FALSE	FALSE	0	0	0.41322521527931	FALSE	0.468574604056682	1	1	1	-1	-1	1	-0.0121218489341578	-0.112671686954209	0.278066561001328	FALSE	rs11642466	1	FALSE	FALSE
ENSG00000235238.1	SUMO2P1	10.9914187279152	11.2824089191679	-	3.78966690515051e-07	FALSE	TRUE	FALSE	FALSE	NA	-	NA	NA	0.438039466138789	0	0.667524775974389	0	0	0.423047644526533	FALSE	FALSE	0	0	0.678997933997577	FALSE	-0.0477354820783551	-1	-1	1	-0.00254562390102607	-1	0.00217792751815253	0.00662272774540208	-0.130237827595628	0.345434623304996	FALSE	rs113085364	0.778586676437445	TRUE	FALSE
ENSG00000135441.3	BLOC1S1	23.8064465366001	59.310580447821	-	3.8878694951407e-07	FALSE	TRUE	FALSE	FALSE	NA	+	+	3.47e-10	0.386008144854804	0	0.667329795373431	0.18363363077608	0	0.73738885651201	FALSE	FALSE	0	0	0.322095773221328	FALSE	0.220672409002501	1	0.926334834951355	1	-0.253603527804623	-1	1	0.0206794086828509	-0.0552929189132971	0.47884121982468	FALSE	rs1316899	1	FALSE	FALSE
ENSG00000077420.10	APBB1IP	84.8786511600096	325.203360393093	+	3.90617223072256e-07	TRUE	FALSE	FALSE	FALSE	NA	+	-	0.0134	0.609924571932207	0.239668388097307	0.802203822688653	0.157265214848348	0	0.573687122273667	FALSE	FALSE	0	0	0.464651745506801	FALSE	0.420283412058905	1	1	1	-1	-1	1	0.0933009534469768	-0.0681669101471543	0.417189300127809	FALSE	rs10829021	1	FALSE	FALSE
ENSG00000130703.11	OSBPL2	26.3341020020417	17.2337330683919	+	3.92849493464274e-07	TRUE	FALSE	FALSE	FALSE	NA	+	+	0.0067	0.440009509916752	0	0.584192204970609	0.094112547660258	0	0.547356734704846	FALSE	FALSE	0.0782089799425005	0	0.337223805477883	FALSE	0.455126424006669	1	1	1	0.000294210737454302	-1	0.602177591693404	0.375456756164346	0.295914460332066	0.57806195712201	FALSE	rs856953	1	FALSE	FALSE
ENSG00000244716.2	NA	0.589657119476268	0.6983384423698	-	3.94078655209376e-07	FALSE	TRUE	FALSE	FALSE	NA	+	NA	NA	0.291548598756501	0	0.599571912486243	0	0	0.073931916780159	FALSE	FALSE	0	0	0	FALSE	-0.0934148374548486	-0.00915759063443077	-1	1	-0.00278420786360404	-1	0.00097092259468064	-0.104819347977324	-0.168138760561628	0.117361153203885	FALSE	rs17035665	1	FALSE	FALSE
ENSG00000181029.7	TRAPPC5	59.5806361009732	457.083562465995	-	3.94255780260766e-07	FALSE	TRUE	FALSE	FALSE	NA	-	+	0.000224	0	0	0.357066708477309	0.185267410450971	0	0.780439726431135	FALSE	FALSE	0	0	0.702658104124929	FALSE	0.303084190052792	1	1	1	-1	-1	1	0.0383761058953182	-0.107567993078185	0.464278115141105	FALSE	rs2115107	1	FALSE	FALSE
ENSG00000198373.8	WWP2	18.6459012224193	8.78769039296721	+	4.03907394850226e-07	TRUE	FALSE	FALSE	FALSE	NA	+	+	0.00971	0.582198582643884	0	0.783423818406166	0	0	0.493071586271639	FALSE	FALSE	0	0	0.402052876140673	FALSE	0.436787996665741	1	0.985583063052208	1	0.480671502267549	-1	1	-0.0875419256197919	-0.26677327655985	0.392750973542035	FALSE	rs68039170	1	FALSE	TRUE
ENSG00000024862.12	CCDC28A	21.742663590604	15.8067716791048	-	4.03993588741476e-07	FALSE	TRUE	FALSE	FALSE	NA	+	-	0.81	0.653596409474832	0.379307518969598	0.78763066774484	0	0	0.583833194613558	FALSE	TRUE	0.191503816334567	0	0.725290233225445	FALSE	0.188107807724368	1	-0.207323439772265	1	-1	-1	1	0.0693596104305574	-0.111412324656983	0.484017008651977	FALSE	rs12215895	1	FALSE	FALSE
ENSG00000124614.9	RPS10	20.380284781941	93.0519926932992	-	4.08600673199758e-07	FALSE	TRUE	FALSE	FALSE	NA	-	NA	NA	0.573695747039611	0.13091228133841	0.690467701867425	0	0	0.540398659122855	FALSE	FALSE	0	0	0.579712375959365	FALSE	0.216560155598777	1	-0.998280777916903	1	-1	-1	1	0.0320161068639725	-0.259602469317006	0.389575959538714	FALSE	rs4713677	1	FALSE	FALSE
ENSG00000186940.6	CHCHD2P9	2.17886895604396	1.69896978662279	-	4.15689641535203e-07	FALSE	TRUE	FALSE	FALSE	NA	-	NA	NA	0.0769700033107932	0	0.614460814742262	0.256506920606651	0	0.704160766469232	FALSE	FALSE	0	0	0.213783461610032	FALSE	0.614781883856627	1	1	1	0.947742118409531	0.0279298178430445	1	-0.238294060454776	-0.404501400461792	0.203705451149434	FALSE	rs7851008	1	FALSE	FALSE
ENSG00000235162.4	C12orf75	3.15113663127413	1.34068767463185	-	4.20066653225514e-07	FALSE	TRUE	FALSE	FALSE	NA	-	+	1.32e-08	0	0	0.491547846347503	0.400552539029123	0	0.729010607307615	FALSE	FALSE	0	0	0.358079732078066	FALSE	0.708363434287302	1	0.774882144224467	1	0.639232145890633	0.517453765708848	1	0.397050517375701	0.288866910131106	0.587565855988184	FALSE	rs7958715	1	FALSE	FALSE
ENSG00000181061.9	HIGD1A	3.0966140067253	3.63423431028402	-	4.2065704174621e-07	FALSE	TRUE	FALSE	FALSE	NA	-	NA	NA	0	0	0.251518729586884	0	0	0.0289407044874854	FALSE	FALSE	0	0	0.462313875873406	FALSE	0.270630730758544	-0.608026931194396	-1	1	0.152687430519598	-0.280041330612834	1	0.180077182709755	0.092919248099572	0.715581935726332	FALSE	rs9311317	1	FALSE	FALSE
ENSG00000187514.10	PTMA	52.2278023367952	137.624548393563	-	4.29659471697747e-07	FALSE	TRUE	FALSE	FALSE	NA	-	+	0.317	0.635537859225883	0.00697706665252474	0.769600798942804	0	0	0.368797316960729	FALSE	FALSE	0.500454829600262	0	0.691750789686574	FALSE	0.319033064740206	1	-1	1	1	-1	1	0.363205779978217	0.255541067125954	0.569690076296837	FALSE	rs6437002	1	FALSE	FALSE
ENSG00000172115.4	CYCS	4.26587536492252	1.69537219080659	-	4.32840867388622e-07	FALSE	TRUE	FALSE	FALSE	NA	-	-	2.61e-07	0.435733163559333	0	0.600954126115258	0	0	0.48066080953748	FALSE	FALSE	0.272822266910274	0	0.61100726817696	FALSE	0.202556265629342	1	-0.470476673419742	1	0.182282185610587	-1	1	0.221473693590665	0.150819994174852	0.482720499021474	FALSE	rs2237316	1	FALSE	FALSE
ENSG00000149658.13	YTHDF1	13.6402091422776	5.22252216113571	+	4.33760965331994e-07	TRUE	FALSE	FALSE	FALSE	NA	+	-	1.69e-10	0	0	0.3853548133961	0.363818196072147	0	0.689988515099462	FALSE	FALSE	0	0	0.588439616398044	FALSE	0.307641011392053	0.129567765873212	-0.999834017389314	1	0.352744347964914	-0.207936554951202	1	0.341801142788295	0.274183550601592	0.629804298764268	FALSE	rs2254398	1	FALSE	FALSE
ENSG00000235655.2	H3F3AP4	79.5078694906954	364.762757068336	-	4.37708893658772e-07	FALSE	TRUE	FALSE	FALSE	NA	-	NA	NA	0.495181364158974	0	0.788244897889044	0.0285931241795077	0	0.523121595705047	FALSE	FALSE	0	0	0.500470150148577	FALSE	0.544206724090025	1	0.989943906608499	1	0.40603160287113	-1	1	0.439169463205484	0.348065429022518	0.647713411570472	FALSE	rs12621127	0.955667229483182	TRUE	FALSE
ENSG00000104805.11	NUCB1	58.4736578176725	137.918282932536	+	4.557777942006e-07	TRUE	FALSE	FALSE	FALSE	NA	+	NA	NA	0.416431005951295	0	0.760443698782145	0.397202082243358	0	0.687754675972781	FALSE	FALSE	0	0	0.467860268232826	FALSE	0.564156710197277	1	1	1	-1	-1	1	0.0275571811318646	-0.130609262393922	0.502716457440191	FALSE	rs8101570	1	FALSE	FALSE
ENSG00000231500.2	RPS18	75.2823071240105	1756.62738489607	-	4.6030715121399e-07	FALSE	TRUE	FALSE	FALSE	NA	-	-	2.63e-07	0.707849778181014	0.218558018311714	0.805760639826048	0	0	0.392399623707029	FALSE	TRUE	0.135877580589503	0	0.652516759110957	FALSE	0.194776326757433	-0.292567298605797	-1	1	-1	-1	1	0.118891275038532	-0.00390729986392358	0.470392008521324	FALSE	rs9394172	1	TRUE	FALSE
ENSG00000100345.16	MYH9	167.6912940129	2082.00189491162	+	4.60624128301598e-07	TRUE	FALSE	FALSE	FALSE	NA	+	+	0.166	0	0	0.567318053985831	0	0	0.6292295995479	FALSE	FALSE	0	0	0	FALSE	0.294248402333982	1	1	1	-1	-1	0.672366342744017	0.0486789678967465	-0.0805454402822139	0.365316258075607	FALSE	rs5750296	0.90539067036847	TRUE	FALSE
ENSG00000228474.1	OST4	117.104376743375	1300.77362218011	-	4.64580125241829e-07	FALSE	TRUE	FALSE	FALSE	NA	-	NA	NA	0.675261893737467	0	0.795821638137944	0	0	0.234611105129967	FALSE	FALSE	0.343646957723923	0	0.693624315397357	FALSE	0.0820783550986385	1	1	1	-1	-1	1	-0.0500244772497831	-0.207971804445796	0.324166289440735	FALSE	rs74175068	1	FALSE	FALSE
ENSG00000030582.12	GRN	230.534525654636	3851.47638494478	+	4.78033146438609e-07	TRUE	FALSE	FALSE	FALSE	NA	+	+	3.48e-11	0.207760442817626	0	0.665054686559428	0.237415377144537	0	0.691775352507061	FALSE	FALSE	0	0	0.561602098977736	FALSE	0.470464017782717	1	1	1	0.207353094408661	-1	1	-0.38941602546043	-0.472895306308133	-0.0132426526468459	FALSE	rs1662746	1	FALSE	FALSE
ENSG00000235016.1	SEMA3F-AS1	15.5489765805705	4.96610617936255	+	4.79297468288952e-07	TRUE	FALSE	FALSE	FALSE	NA	+	NA	NA	0	0	0.263252380591899	0	0	0.544841180172629	FALSE	FALSE	0.199937568305351	0	0.55130082614389	FALSE	0.276632397888302	-1	-1	1	1	0.401739703853296	1	0.219006896119472	0.0596939585238402	0.544142875752163	FALSE	rs34484573	1	FALSE	FALSE
ENSG00000106560.6	GIMAP2	15.4534028905877	61.4767928031706	-	4.82304735258634e-07	FALSE	TRUE	FALSE	FALSE	NA	-	+	0.483	0.119986422966512	0	0.655821544522569	0.415316605696831	0.000442511708860283	0.623481491984854	FALSE	FALSE	0	0	0.248675269075573	FALSE	0.422395109752709	1	0.0709652618049867	1	-1	-1	0.484925604025357	0.232477139039637	0.102716546518872	0.522149256638703	FALSE	rs7806921	1	FALSE	FALSE
ENSG00000225200.2	NA	12.5054466853035	34.8828010912195	-	4.9723839970444e-07	FALSE	TRUE	FALSE	TRUE	413	-	NA	NA	0.523063099364015	0	0.650804518802938	0	0	0.0103402527422544	FALSE	FALSE	0.023108881594769	0	0.574658506071703	FALSE	0.0153931647679911	-1	-1	1	-1	-1	1	0.0303286344656965	-0.104047334362339	0.45246733685493	FALSE	rs2280797	1	FALSE	FALSE
ENSG00000244313.2	NA	92.5804750931099	2011.2919222705	-	5.03510117677294e-07	FALSE	TRUE	FALSE	FALSE	NA	-	NA	NA	0.491108329417566	0	0.65897938692261	0.0606676858224822	0	0.564041094702215	FALSE	FALSE	0	0	0.328149906436596	FALSE	0.1707696582384	1	0.401300666889436	1	-1	-1	1	-0.0143613444282013	-0.265770072228587	0.383328278800382	FALSE	rs67871383	1	FALSE	FALSE
ENSG00000117984.8	CTSD	190.713827299331	2398.35293367004	+	5.03788606237803e-07	TRUE	FALSE	FALSE	FALSE	NA	+	+	1.58e-13	0	0	0.241537662087158	0.123248976782021	0	0.733388066110674	FALSE	FALSE	0	0	0.510770298514557	FALSE	0.423061961656016	1	1	1	1	0.563350213000905	1	-0.132166462254108	-0.300124501676711	0.219237449825722	FALSE	rs11037265	1	FALSE	FALSE
ENSG00000080845.13	DLGAP4	9.29161967589899	5.97621064592758	+	5.05127380262029e-07	TRUE	FALSE	FALSE	FALSE	NA	+	+	3.39e-08	0	0	0.592157931094203	0	0	0.507831353767568	FALSE	FALSE	0	0	0	FALSE	0.525479299805502	1	0.998050313385586	1	0.744851553650515	0.00375255638494379	1	0.220123067563076	0.0938621528857754	0.451280974361375	FALSE	rs1006296	1	FALSE	TRUE
ENSG00000112029.5	FBXO5	0.705662716081718	0.11931285671712	-	5.08489486164843e-07	FALSE	TRUE	FALSE	FALSE	NA	-	-	1.09e-05	0.384233118439803	0	0.661679463493692	0	0	0.380658170029092	FALSE	FALSE	0	0	0.486577766927803	FALSE	0.113642678521812	0.383647708340587	-1	1	1	0.545660115111022	1	-0.0151000181494691	-0.1458090321943	0.337640471454969	FALSE	rs3020368	1	FALSE	FALSE
ENSG00000140319.6	SRP14	24.007463875	46.2916349930402	-	5.10054788052186e-07	FALSE	TRUE	FALSE	FALSE	NA	-	+	0.465	0.523147684549556	0	0.720700070269007	0	0	0.38356380129655	FALSE	FALSE	0.153921181187037	0	0.619525376912174	FALSE	0.0293414837454849	-0.184814897938179	-0.999999990666568	1	-1	-1	0.00559949775262263	0.10138898997546	-0.0685242568538973	0.421830718844939	FALSE	rs1865753	0.950531629783971	TRUE	FALSE
ENSG00000182472.4	CAPN12	4.61677347226977	1.00011967521071	+	5.16024077852834e-07	TRUE	FALSE	FALSE	FALSE	NA	+	-	0.101	0.120520418163417	0	0.452864668743945	0	0	0.568576909120863	FALSE	FALSE	0.24182122114391	0	0.572590164128367	FALSE	0.463684356765768	0.30847797949302	0.0584727221435656	1	1	0.00184104056136034	1	0.422992666719305	0.353729615251468	0.66817011168192	FALSE	rs79768279	1	FALSE	FALSE
ENSG00000213741.4	RPS29	17.6911225490196	242.732531206249	-	5.17891645059962e-07	FALSE	TRUE	FALSE	FALSE	NA	-	-	7.6e-11	0.340363624715844	0	0.685491436982941	0	0	0.170719578745968	FALSE	FALSE	0	0	0.0630797992173028	FALSE	0.219672131147541	1	1	1	-1	-1	1	-0.132030745962099	-0.326636153117186	0.286125047980652	FALSE	rs8010501	1	FALSE	FALSE
ENSG00000244491.1	NA	113.631762254902	1094.17232936457	+	5.19147526223795e-07	TRUE	FALSE	FALSE	FALSE	NA	+	NA	NA	0	0	0.482311021415935	0	0	0.508021579005337	FALSE	FALSE	0.245124369868933	0	0.699518237923184	FALSE	0.481244790219506	1	-0.997677138836855	1	0.243743184320043	0.00681371659524774	1	0.655639820993751	0.592329934043961	0.802931630739474	FALSE	rs139272	0.512702515153013	TRUE	FALSE
ENSG00000132376.14	INPP5K	27.7268559267241	14.017382499302	+	5.30367376839584e-07	TRUE	FALSE	FALSE	FALSE	NA	+	+	0.00931	0	0	0.592243928890235	0	0	0.557068600360114	FALSE	FALSE	0	0	0.702277429104962	FALSE	0.564767991108641	0.76797413297346	0.601024457232994	1	0.627087856561172	0.444704390806339	1	0.348234866386273	0.267205080951427	0.840462866515428	FALSE	rs4268798	1	FALSE	FALSE
ENSG00000128524.4	ATP6V1F	75.0382375954198	316.317608550411	-	5.46356130293175e-07	FALSE	TRUE	FALSE	FALSE	NA	-	+	0.000167	0.558629838127352	0.171162101161604	0.90116285173344	0	0	0.464703719295587	FALSE	TRUE	0.377990240835274	0	0.788853696736467	FALSE	0.252792442345096	1	-0.730992920162668	1	-1	-1	-0.380499684544798	0.374629812939393	0.335701088476935	0.651538242480332	FALSE	rs13245629	1	FALSE	FALSE
ENSG00000108312.10	UBTF	23.9488158688656	18.1641216345193	+	5.66594155869769e-07	TRUE	FALSE	FALSE	FALSE	NA	+	-	9.37e-10	0	0	0.499111714604361	0	0	0.450053762976633	FALSE	FALSE	0	0	0.0514285447712672	FALSE	0.529313698249514	0.623691937017391	0.723134198630641	1	0.409459224235236	-0.982822240118342	1	0.534697031467312	0.456244997711494	0.657685165711203	FALSE	rs11651547	1	FALSE	FALSE
ENSG00000104419.10	NDRG1	14.8573631324252	6.68622996355043	+	5.77180057330946e-07	TRUE	FALSE	FALSE	FALSE	NA	+	+	2.38e-05	0.156139234161834	0	0.640835220025471	0.110674666554961	0	0.640789322509802	FALSE	FALSE	0	0	0.601391742103709	FALSE	0.514809669352598	1	0.354067269857421	1	0.224509058008025	-1	1	0.374142089247393	0.20203931717478	0.700894508377953	FALSE	rs6983833	1	FALSE	FALSE
ENSG00000226084.4	NA	9.78228875811688	136.664451037748	-	5.78260109995445e-07	FALSE	TRUE	FALSE	FALSE	NA	-	NA	NA	0.391160896883079	0	0.684651813202709	0	0	0.493759946491189	FALSE	FALSE	0	0	0.702781048410318	FALSE	0.0371214226173937	1	-0.978293788392714	1	-1	-1	1	-0.168572417401714	-0.341097154092561	0.22437765290777	FALSE	rs199697	1	FALSE	FALSE
ENSG00000238243.2	OR2W3	5.62916212121212	25.0304180613381	+	5.97528861168817e-07	TRUE	FALSE	FALSE	FALSE	NA	-	NA	NA	0.201026483810909	0	0.451592497119814	0.38480284134148	0	0.742079256206311	FALSE	FALSE	0	0	0.569675100227184	FALSE	0.548930258405113	1	0.629309928250413	1	-1	-1	1	0.602746316505424	0.418301709610199	0.765440282890943	FALSE	rs4925541	1	FALSE	FALSE
ENSG00000256309.1	NA	1.75073888508892	12.1011574652882	+	6.07425325446429e-07	TRUE	FALSE	FALSE	FALSE	NA	+	NA	NA	0.589627943022923	0	0.74805514307022	0.566963236350335	0.135380862487165	0.79798750799923	FALSE	FALSE	0	0	0.646919405157183	FALSE	0.547429841622673	0.747413632843943	0.647652476169341	1	1	-1	1	0.304141759631672	0.171749662682306	0.643534668743836	FALSE	rs10498060	1	FALSE	FALSE
ENSG00000105072.4	C19orf44	4.74230087868481	0.734144685881326	+	6.09665267220622e-07	TRUE	FALSE	FALSE	FALSE	NA	+	-	0.494	0	0	0.0298104143654255	0.00380841697936555	0	0.26484986052049	FALSE	FALSE	0	0	0.130051140055187	FALSE	0.503806612948041	1	0.271933812032293	1	1	0.00614947874407818	1	0.47591933076121	0.413408438866741	0.611006225299002	FALSE	rs8103263	1	FALSE	FALSE
ENSG00000269711.1	NA	63.9575045219638	499.810213562439	-	6.13731634962811e-07	FALSE	TRUE	FALSE	FALSE	NA	-	NA	NA	0	0	0.367015329686556	0.254327682472114	0	0.814037194768875	FALSE	FALSE	0	0	0.744777914408852	FALSE	0.280244512364546	1	1	1	-1	-1	1	0.0724727078458265	-0.0519195832298304	0.521737124019574	FALSE	rs2115107	1	FALSE	FALSE
ENSG00000255857.1	PXN-AS1	72.3076783949291	171.843771317327	+	6.30520298160056e-07	TRUE	FALSE	FALSE	FALSE	NA	+	NA	NA	0.674869935266551	0.374316903426305	0.842375674890161	0	0	0.527985382717504	FALSE	TRUE	0	0	0.468137930669059	FALSE	0.411003056404557	1	1	1	1	-0.0753651274325821	1	0.0787461133930191	-0.0623868542042321	0.396085526304057	FALSE	rs141832479	1	FALSE	FALSE
ENSG00000171603.11	CLSTN1	16.7337841155235	16.5870331449986	+	6.3480791603406e-07	TRUE	FALSE	FALSE	FALSE	NA	+	+	0.301	0	0	0.502071066856527	0.28165673749331	0	0.653804109824342	FALSE	FALSE	0	0	0.616644829703899	FALSE	0.569547096415671	1	0.725030191908937	1	0.61540522909175	0.084100199948461	1	0.471794985717472	0.40184097150885	0.729746192716852	FALSE	rs11121384	1	FALSE	FALSE
ENSG00000148303.12	RPL7A	134.05073831619	1597.62809291616	-	6.37372232198005e-07	FALSE	TRUE	FALSE	FALSE	NA	-	NA	NA	0.650880788260088	0.243778776690002	0.758192990565194	0	0	0.277483324289943	FALSE	TRUE	0.276505159840225	0	0.691525323795837	FALSE	0.290080577938316	1	-1	1	-1	-1	0.2921663718189	0.276036349427024	0.124986684780396	0.569462903659715	FALSE	rs2519143	1	FALSE	FALSE
ENSG00000168118.7	RAB4A	3.68558740115572	0.915016554568665	-	6.53564694467666e-07	FALSE	TRUE	FALSE	FALSE	NA	-	-	0.734	0.2298774111255	0	0.645598829569782	0	0	0.152792126428568	FALSE	FALSE	0	0	0.263605702925255	FALSE	0.14887468741317	1	0.998870078807499	1	-0.13403321783468	-0.998299749378428	1	-0.0280135786749474	-0.141963283398486	0.215135457855241	FALSE	rs452663	1	FALSE	FALSE
ENSG00000006712.10	PAF1	24.0754156473466	23.6622992025626	+	6.97949285603147e-07	TRUE	FALSE	FALSE	FALSE	NA	+	-	0.507	0	0	0.557924278272456	0.472575238721474	0	0.810149943397946	FALSE	FALSE	0.264318704918515	0	0.533817421883111	FALSE	0.577549319255349	1	0.618672113387776	1	1	0.000655865737150291	1	0.385741051716151	0.263121367675832	0.676620708223731	FALSE	rs1079162	1	TRUE	FALSE
ENSG00000165389.6	SPTSSA	2.95821117117117	1.43153292314785	-	7.36872348221225e-07	FALSE	TRUE	FALSE	FALSE	NA	-	+	0.368	0.0218550424948999	0	0.760992421403179	0	0	0.643314170732073	FALSE	FALSE	0	0	0.0410446937472708	FALSE	0.240900250069464	1	0.823430924549643	1	-0.580652447807753	-1	1	0.180662041739607	0.0733655294086221	0.345099273748108	FALSE	rs1958538	1	FALSE	FALSE
ENSG00000101084.12	C20orf24	77.7734881031064	333.373469380285	-	7.37719265619489e-07	FALSE	TRUE	FALSE	FALSE	NA	-	+	9.89e-11	0.271903131043981	0	0.628139081913073	0.118368397646188	0	0.612645121530637	FALSE	FALSE	0	0	0.538398052990891	FALSE	0.176771325368158	0.330929738753774	-0.996434408869378	1	-0.108931504316933	-1	1	0.343818628441013	0.276661036327427	0.619552460131773	FALSE	rs1146262	1	FALSE	FALSE
ENSG00000150540.9	HNMT	0.884967556446508	0.247823921273375	-	7.40629162753638e-07	FALSE	TRUE	FALSE	FALSE	NA	-	+	1.65e-08	0	0	0.402141958698588	0	0	0.487823558275788	FALSE	FALSE	0	0	0.434593441778723	FALSE	0.389608224506808	1	0.711365033800737	1	0.148700388004633	-1	1	0.205817980159865	0.0295431835337865	0.450907384739403	FALSE	rs892882	1	FALSE	FALSE
ENSG00000101608.6	MYL12A	148.20026059322	1177.97457673503	-	7.45099300138662e-07	FALSE	TRUE	FALSE	FALSE	NA	-	-	0.0643	0.60394631240014	0	0.731149914539484	0.50467463777736	0	0.71415572083127	FALSE	FALSE	0	0	0.345263801487675	FALSE	-0.00416782439566546	0.163683669745417	0.271306735095368	1	-0.0189980876253291	-1	0.508996485230735	-0.0473848355539783	-0.18422827747674	0.423456021325037	FALSE	rs9952548	1	FALSE	FALSE
ENSG00000113558.12	SKP1	17.1603528835885	11.3111367316977	-	7.50097957332002e-07	FALSE	TRUE	FALSE	TRUE	585	-	-	0.228	0.420808330237039	0	0.637744018284755	0	0	0.493447357916	FALSE	FALSE	0.439170550880643	0	0.662198474288506	FALSE	0.0666851903306474	-0.413096180465439	-1	1	-1	-1	1	0.036555408218423	-0.135979430145488	0.284209853027597	FALSE	rs10477750	1	FALSE	FALSE
ENSG00000229638.1	RPL4P4	79.619687451286	632.935910778426	-	7.54031502704003e-07	FALSE	TRUE	FALSE	FALSE	NA	-	NA	NA	0.576649325995796	0.102356807768639	0.724657355377206	0	0	0.342417502162861	FALSE	FALSE	0.158731907367693	0	0.614412487869638	FALSE	0.259572103362045	-0.599480117188085	-1	1	-1	-1	1	0.169982734095891	0.0486413715981536	0.574662219270589	FALSE	rs4686725	1	FALSE	FALSE
ENSG00000175606.6	TMEM70	3.02735215053763	0.790970693491514	-	7.59488257814963e-07	FALSE	TRUE	FALSE	FALSE	NA	-	-	0.176	0	0	0.592303386941426	0	0	0	FALSE	FALSE	0	0	0.526742325469869	FALSE	0.132370102806335	-0.448490476101673	-1	1	0.377641107673556	0.229368530231251	1	-0.154868545759202	-0.19599390243179	0.195859625595072	FALSE	rs2956060	1	FALSE	FALSE
ENSG00000265681.1	RPL17	9.07771670560748	51.6223321395103	-	7.62098933233597e-07	FALSE	TRUE	FALSE	FALSE	NA	-	-	2.85e-11	0.388530588193352	0	0.68070173024373	0	0	0.421245293281975	FALSE	FALSE	0	0	0.442714802350245	FALSE	0.104473464851348	-0.964387505208231	-1	1	-1	-1	1	0.0525930037093524	-0.0718904681239134	0.392522449121621	FALSE	rs299755	1	FALSE	FALSE
ENSG00000086598.5	TMED2	15.7706287840244	22.3604621557301	-	7.70654883937258e-07	FALSE	TRUE	FALSE	FALSE	NA	-	-	0.802	0.585932847190582	0	0.844818122343055	0	0	0.579643059304498	FALSE	FALSE	0	0	0.576076695437415	FALSE	0.35187552097805	1	1	1	1	-0.184997104934879	1	0.00813595403378723	-0.098561864112248	0.377370682154922	FALSE	rs1662	1	FALSE	FALSE
ENSG00000182287.9	AP1S2	6.73286129529324	12.1659728575465	-	7.73886557364851e-07	FALSE	TRUE	FALSE	FALSE	NA	-	+	0.000287	0	0	0.639171228286763	0	0	0.160319702043924	FALSE	FALSE	0	0	0.0364951666681422	FALSE	0.350041678243957	NA	0.992297290255886	1	NA	-1	1	NA	0.191565051819485	0.538353202326704	FALSE	NA	NA	FALSE	FALSE
ENSG00000010270.9	STARD3NL	2.58899437975559	0.857694779342352	-	7.94187076950835e-07	FALSE	TRUE	FALSE	FALSE	NA	-	+	6.86e-09	0	0	0.593324012234599	0	0	0.412495558644043	FALSE	FALSE	0	0	0	FALSE	0.387107529869408	1	1	1	0.339940415176092	-0.384984156736838	1	0.0457756563775531	-0.14413009416119	0.491804171439909	FALSE	rs10807891	1	FALSE	FALSE
ENSG00000117091.5	CD48	45.4114135040161	238.918983662352	-	8.18511039646095e-07	FALSE	TRUE	FALSE	FALSE	NA	-	-	0.0474	0.70328014495399	0.104635383265864	0.839089311599688	0.399791835659344	0	0.648760633540286	FALSE	FALSE	0	0	0.492109162270006	FALSE	0.373826062795221	1	0.564828334065908	1	-1	-1	0.999949262394891	-0.076350667583456	-0.196092468830181	0.422786951245299	FALSE	rs4131775	1	FALSE	FALSE
ENSG00000255292.1	NA	4.46774588514996	1.47104472843703	-	8.39654636083544e-07	FALSE	TRUE	FALSE	TRUE	11	-	NA	NA	0	0	0.473532535156263	0	0	0.637591752589624	FALSE	FALSE	0	0	0.387668042386264	FALSE	-0.0512920255626563	-0.0547257062381103	-0.9996331452808	1	-1	-1	0.0126102829089474	0.140273854115139	-0.0139248187628997	0.422206291949236	FALSE	rs679032	1	FALSE	FALSE
ENSG00000142534.2	RPS11	392.83097575703	18368.8622821655	-	8.45383469944268e-07	FALSE	TRUE	FALSE	FALSE	NA	-	-	8.89e-07	0.716686124448369	0.270238397337444	0.812424601716906	0	0	0.0360573007412335	FALSE	TRUE	0.323073174583004	0	0.752381261724822	FALSE	0.0891358710752987	-1	-1	1	-1	-1	1	0.227418554564445	0.0908574249544297	0.49208201857599	FALSE	rs45536631	1	FALSE	FALSE
ENSG00000168374.6	ARF4	21.9115628140704	15.3047912151252	-	8.48800428046741e-07	FALSE	TRUE	FALSE	FALSE	NA	-	-	0.0222	0.271783230849824	0	0.708510467703154	0	0	0.479375671997848	FALSE	FALSE	0	0	0.528631699154268	FALSE	0.237954987496527	-1	-0.897631340732522	1	1	-1	1	0.100124497578455	-0.117913691425197	0.367949849373064	FALSE	rs56357826	1	TRUE	FALSE
ENSG00000215424.5	MCM3AP-AS1	4.41296837151132	0.642547118620756	+	8.66852441459746e-07	TRUE	FALSE	FALSE	FALSE	NA	+	-	0.00742	0.114101106823614	0	0.670948299576472	0	0	0.548599095291711	FALSE	FALSE	0.385091432578967	0	0.700051796014227	FALSE	0.587274242845235	0.462453485016589	0.267192755917571	1	0.833124076852575	0.00472929866387213	1	0.359404581420469	0.336063763575018	0.691003363715038	FALSE	rs2839360	1	FALSE	FALSE
ENSG00000005022.5	SLC25A5	67.1369787625418	102.07987697611	-	8.73020580375735e-07	FALSE	TRUE	FALSE	FALSE	NA	-	NA	NA	0.654296314280013	0.00322537651758356	0.866257651771633	0.102921649288076	0	0.659616804787942	FALSE	FALSE	0.358997188413655	0	0.856782590461622	FALSE	0.378771881078077	0.0784965345212372	-1	1	1	-1	1	0.367515803301585	0.298536172273408	0.717520397870025	FALSE	NA	NA	FALSE	FALSE
ENSG00000187555.10	USP7	11.6812439800807	4.35461468842425	+	8.79168882071352e-07	TRUE	FALSE	FALSE	FALSE	NA	-	-	0.00146	0	0	0.454358125542225	0	0	0.68916474812487	FALSE	FALSE	0.0539562379310774	0	0.577909680267644	FALSE	0.260016671297583	-1	-1	1	0.501475134733617	-0.186016085467708	1	0.265639042458811	0.162174352344884	0.46849388415414	FALSE	rs12445146	1	FALSE	FALSE
ENSG00000092841.13	MYL6	62.0737322437011	445.695224360568	-	8.84872954691034e-07	FALSE	TRUE	FALSE	FALSE	NA	+	+	8.4e-09	0	0	0.55627831312172	0	0	0.464216155394965	FALSE	FALSE	0	0	0.186922097053676	FALSE	0.0771881078077244	1	1	1	-0.191659929045497	-0.981733633125256	1	-0.187221172869095	-0.268684016337841	0.22638291705357	FALSE	rs10783800	1	FALSE	FALSE
ENSG00000146386.7	ABRACL	19.1159250208855	49.1655208112478	-	9.03976297188782e-07	FALSE	TRUE	FALSE	FALSE	NA	-	-	0.00358	0.78111842896505	0.485638381628408	0.867678959106439	0.175102465782758	0	0.633670222978252	FALSE	TRUE	0.0522888053903379	0	0.566881890869122	FALSE	0.161822728535704	1	1	1	-1	-1	0.633545390551324	0.167722679762075	0.0176541166562617	0.553566145380461	FALSE	rs6930810	0.283084631667635	TRUE	FALSE
ENSG00000163600.8	ICOS	3.1472243844697	2.12462225092103	-	9.54433061604429e-07	FALSE	TRUE	FALSE	FALSE	NA	-	-	9.63e-40	0.0849870778675352	0	0.467336861515491	0.0463346877973418	0	0.578171568234431	FALSE	FALSE	0	0	0.381960806553681	FALSE	0.425062517365935	1	0.752459883336545	1	1	-0.0193973479211161	1	0.279931954722383	0.142559119257845	0.450422679548131	FALSE	rs3181100	1	FALSE	FALSE
ENSG00000184076.10	UQCR10	27.7851731757451	78.2815659976175	-	9.96879495753861e-07	FALSE	TRUE	FALSE	FALSE	NA	-	+	0.373	0.484971924633345	0	0.645119793861127	0	0	0.39312419597173	FALSE	FALSE	0.119867541563595	0	0.651412251484244	FALSE	0.0660183384273409	-0.249572555094902	-1	1	-1	-1	1	0.262170678838582	0.111016321703964	0.57113842111168	FALSE	rs78568412	1	FALSE	FALSE
ENSG00000174444.10	RPL4	82.4397253896453	646.777705889271	-	1.0040875699677e-06	FALSE	TRUE	FALSE	FALSE	NA	-	-	7.63e-16	0.595907681321003	0.12561850941361	0.773266127125481	0	0	0.482155435152502	FALSE	FALSE	0.3375733470645	0	0.650312557541475	FALSE	0.32820227841067	-0.232342824678803	-1	1	-1	-1	1	0.237661758026759	0.121328757823935	0.552554852442833	FALSE	rs11631842	1	FALSE	FALSE
ENSG00000196235.9	SUPT5H	20.9239832995329	16.7510585980236	+	1.01269621045754e-06	TRUE	FALSE	FALSE	FALSE	NA	+	-	0.00568	0	0	0.276065232246427	0	0	0.55610365838895	FALSE	FALSE	0	0	0.403272280741944	FALSE	0.625562656293415	1	0.88944870581162	1	0.613977049881674	0.330766984075191	1	0.543700577161521	0.472321816478309	0.720538502170127	FALSE	rs62121526	1	FALSE	FALSE
ENSG00000145335.11	SNCA	6.98891069198101	54.3438129062745	+	1.01733509210665e-06	TRUE	FALSE	FALSE	FALSE	NA	+	+	0.196	0.373029997704487	0	0.629599592425299	0.264794794497856	0	0.693952598567898	FALSE	FALSE	0	0	0.0285533062119276	FALSE	0.628730202834121	1	1	1	0.269769581672397	-1	1	0.689289612116864	0.536462542739952	0.843528538190641	FALSE	rs17016912	1	FALSE	FALSE
ENSG00000180964.12	TCEAL8	6.30921246923708	4.56459170498328	-	1.02003211869171e-06	FALSE	TRUE	FALSE	FALSE	NA	-	-	6.9e-06	0.488889788602112	0	0.706463138814195	0.388358006135738	0	0.630888381558317	FALSE	FALSE	0.123543204647098	0	0.681031498633262	FALSE	0.105751597666018	0.554604644207084	-0.996964216962909	1	-1	-1	1	0.229179023275492	0.11778590108213	0.558235070656729	FALSE	NA	NA	FALSE	FALSE
ENSG00000167283.3	ATP5L	10.3325263724036	13.1696542886478	-	1.02255736321645e-06	FALSE	TRUE	FALSE	FALSE	NA	-	-	4.95e-09	0.58061023851037	0.114583012622965	0.780666470872652	0	0	0.595636271889404	FALSE	FALSE	0	0	0.342766252974437	FALSE	-0.00305640455682134	-0.00533484666015318	-0.999551149138185	1	-1	-1	-0.000937469871297945	0.0524804542692007	-0.137265603627148	0.323694552616414	FALSE	NA	NA	FALSE	FALSE
ENSG00000263276.1	NA	7.26528066037736	4.37801079579793	+	1.04550168826684e-06	TRUE	FALSE	FALSE	FALSE	NA	+	NA	NA	0	0	0.582176851437399	0.33546348968196	0	0.767774349679465	FALSE	FALSE	0	0	0.403151956049843	FALSE	0.233564879133093	1	1	1	-0.622841266243447	-1	1	0.246025384126312	0.13690962140384	0.521708233817767	FALSE	rs74635048	0.274957510214087	TRUE	FALSE
ENSG00000159377.6	PSMB4	54.6608325023191	119.835171680868	-	1.04715305435471e-06	FALSE	TRUE	FALSE	FALSE	NA	+	+	0.143	0.646792929061019	0.0521460680882396	0.846778057723241	0	0	0.420947520986168	FALSE	FALSE	0	0	0.316722197674583	FALSE	0.145040288969158	1	-0.170681215417362	1	-0.988786389032167	-1	0.955607593517714	0.0560362858971703	-0.0538683137598209	0.339209786528202	FALSE	rs1196357	1	FALSE	FALSE
ENSG00000078369.11	GNB1	62.0516882761438	45.9114078788857	+	1.0797412361369e-06	TRUE	FALSE	FALSE	FALSE	NA	-	+	0.249	0.461459602819073	0	0.752620168859846	0.0220363939603449	0	0.68592872518395	FALSE	FALSE	0	0	0.0584404004216956	FALSE	0.375882189497083	1	1	1	-1	-1	0.76783059171896	0.00205830934815807	-0.109249779016205	0.3010123507766	FALSE	rs2494626	1	FALSE	FALSE
ENSG00000111667.9	USP5	15.8082857959129	12.1740194450159	+	1.0844498033654e-06	TRUE	FALSE	FALSE	FALSE	NA	+	-	0.177	0	0	0.600769000711247	0.0686856492174523	0	0.534024884469362	FALSE	FALSE	0	0	0.599498751841911	FALSE	0.714698527368714	0.794649034226314	0.561398258879	1	0.673224143989351	0.477811972868026	1	0.544988701661217	0.468324249329985	0.728819001258304	FALSE	rs7969455	1	FALSE	FALSE
ENSG00000214955.4	NA	5.38032219031993	1.80975225064901	-	1.0911988712318e-06	FALSE	TRUE	FALSE	FALSE	NA	-	NA	NA	0	0	0.358718283568042	0.0789298661089717	0	0.274805757432553	FALSE	FALSE	0	0	0.526932515494139	FALSE	0.198666296193387	1	0.997387398271823	1	-0.0431996481311072	-1	1	0.0830537064913358	-0.000504523098344652	0.41297845245094	FALSE	rs8127500	1	FALSE	FALSE
ENSG00000224550.1	NA	2.26599591836735	5.34939743506619	-	1.13512303441628e-06	FALSE	TRUE	FALSE	TRUE	46	-	NA	NA	0	0	0.537104927181712	0.281755593288642	0	0.591906076945902	FALSE	FALSE	0.0679879955700388	0	0.636444713006268	FALSE	0.0530702973048069	1	0.382329006402593	1	1	-1	1	-0.179485189386978	-0.364664885788761	0.199189151107127	FALSE	rs600348	1	FALSE	FALSE
ENSG00000230202.1	NA	228.633005285412	5338.04907571154	-	1.16975925047912e-06	FALSE	TRUE	FALSE	FALSE	NA	-	NA	NA	0.655671674220364	0.346978486617659	0.80134592566466	0	0	0.0944709125043443	FALSE	TRUE	0	0	0.641956915732301	FALSE	0.135482078355099	1	-0.991420987565777	1	-1	-1	1	0.170954040715822	0.0105024490058317	0.494339121339583	FALSE	rs6901880	1	FALSE	FALSE
ENSG00000185787.10	MORF4L1	12.7339669634703	5.39185783805603	-	1.17212907893606e-06	FALSE	TRUE	FALSE	FALSE	NA	-	-	0.353	0.391997573501745	0	0.64599704270719	0	0	0.208790319828934	FALSE	FALSE	0	0	0.565673458855996	FALSE	0.223728813559322	1	1	1	-1	-1	1	-0.172843462136694	-0.325764304344429	0.15601924143164	FALSE	rs1036378	1	FALSE	FALSE
ENSG00000105568.13	PPP2R1A	33.514233300451	33.5747632668617	+	1.18214980702766e-06	TRUE	FALSE	FALSE	FALSE	NA	+	-	0.0253	0	0	0.587444905988034	0	0	0.445165638481406	FALSE	FALSE	0	0	0.703007373951132	FALSE	0.559210891914421	0.0773078249565724	-0.995528559487771	1	0.406781660506544	0.00716171618956179	1	0.555702591572097	0.497480223980527	0.749893876493212	FALSE	rs4801914	1	FALSE	FALSE
ENSG00000232176.1	NA	5.31293037974684	12.2862189537546	-	1.18759086877187e-06	FALSE	TRUE	FALSE	FALSE	NA	-	NA	NA	0.583938372301864	0	0.72314597810823	0.0592914456292385	0	0.67781103887819	FALSE	FALSE	0.518595762297967	0	0.743349447255217	FALSE	0.0728535704362323	-0.268763320449918	-1	1	-0.368308058675547	-1	1	0.155616276029544	0.0110297928235468	0.544891564932748	FALSE	rs62549386	1	FALSE	FALSE
ENSG00000123505.9	AMD1	21.1082078351836	32.7733115476609	-	1.2187673977731e-06	FALSE	TRUE	FALSE	FALSE	NA	-	-	6.13e-06	0.0436948082584411	0	0.603166171938871	0.0371959042241327	0	0.580470884281523	FALSE	FALSE	0	0	0.504317602370509	FALSE	0.21183662128369	1	0.942220361730003	1	0.414014862385572	0.172643073908809	1	0.206431814829134	0.0431441559712726	0.51114037354208	FALSE	rs72942158	1	FALSE	FALSE
ENSG00000257309.1	NA	79.78374543379	1654.72381015965	-	1.22149527771336e-06	FALSE	TRUE	FALSE	FALSE	NA	+	NA	NA	0.34359883693301	0	0.704788625919722	0	0	0.391305636498677	FALSE	FALSE	0.115437174343332	0	0.62997729200098	FALSE	0.0695193109196999	0.00827298542073321	-1	1	0.67015847393196	-0.114704967655628	1	0.0139321883525735	-0.0864040297232006	0.324931487303378	FALSE	rs10876835	1	FALSE	FALSE
ENSG00000108349.9	CASC3	53.2304049102132	50.9584891590626	+	1.25393852296862e-06	TRUE	FALSE	FALSE	FALSE	NA	+	+	0.109	0.563356768166341	0.214885463901902	0.827800429382505	0	0	0.598919346452202	FALSE	FALSE	0.147250354294411	0	0.492394093427649	FALSE	0.435454292859128	1	1	1	1	0.00144032839818233	1	0.198759640211265	0.0820697676373566	0.430624031010998	FALSE	rs3764352	1	FALSE	FALSE
ENSG00000256007.1	ARAP1-AS1	127.180064119171	1588.70708860382	+	1.2817897570842e-06	TRUE	FALSE	FALSE	FALSE	NA	+	NA	NA	0.6548331250425	0.244480869238585	0.821640022774078	0.296277367102256	0	0.718655127776652	FALSE	FALSE	0.442129341669402	0	0.73022606815003	FALSE	0.428507918866352	0.630933877838618	0.394512983716174	1	0.0275981804870448	-0.00152625220167891	1	0.15753417914575	0.0380956992689733	0.557924262106611	FALSE	rs1806516	1	FALSE	FALSE
ENSG00000078618.14	NRDC	29.2574152301033	18.7740932991684	+	1.32929660685712e-06	TRUE	FALSE	FALSE	FALSE	NA	+	+	0.323	0.62555815837009	0.0762475109735218	0.790625052847873	0.346721013919817	0	0.678155959114968	FALSE	FALSE	0.306431803627032	0	0.59751701139284	FALSE	0.403889969435955	0.521446367027048	0.433838681751609	1	0.000825722883187473	6.78304874947763e-05	1	0.278585952602388	0.0977989215010186	0.577529453160446	FALSE	rs1983833	1	FALSE	FALSE
ENSG00000171302.11	CANT1	35.6371804345334	23.1888853951208	+	1.34685739855913e-06	TRUE	FALSE	FALSE	FALSE	NA	-	+	0.178	0.376726358805145	0	0.736344386214359	0	0	0.318397419443312	FALSE	FALSE	0	0	0.263131514649465	FALSE	0.626340650180606	1	1	1	-0.00102878973952825	-0.00325678660017799	0.00428411823342185	0.438122787343172	0.341027584375955	0.648800657213978	FALSE	rs62061736	1	FALSE	FALSE
ENSG00000177868.7	SVBP	5.30061689627229	2.73533205827134	-	1.38031979116718e-06	FALSE	TRUE	FALSE	FALSE	NA	-	+	0.112	0.451481784097782	0	0.699608894470116	0.0670995436080668	0	0.650683813575584	FALSE	FALSE	0.536511894686341	0	0.685646064860215	FALSE	-0.117977215893304	-0.642352090763702	-1	1	-0.0671673490575421	-1	1	0.0824436066651612	-0.188070420092611	0.365685476017988	FALSE	rs56072551	1	FALSE	FALSE
ENSG00000242299.1	NA	78.1092167030568	1906.27314774046	-	1.38255935955893e-06	FALSE	TRUE	FALSE	FALSE	NA	-	NA	NA	0.642292975131888	0.198721354163913	0.774248101347651	0	0	0.31569594490781	FALSE	TRUE	0	0	0.335553802864336	FALSE	0.184440122256182	-0.203498135012459	-1	1	-1	-1	1	0.169306011698008	0.0122999874479921	0.471612675472293	FALSE	rs1707574	1	FALSE	FALSE
ENSG00000138495.2	COX17	2.22187239944521	0.521408856680448	-	1.38379877145291e-06	FALSE	TRUE	FALSE	FALSE	NA	-	NA	NA	0	0	0.750241421000046	0	0	0.476916411868989	FALSE	FALSE	0	0	0.187569639220043	FALSE	0.250903028619061	0.999683724529275	0.935908556756159	1	0.363379872265919	-0.139210001500109	1	-0.00995118638363717	-0.135626161286428	0.157202576570321	FALSE	rs9289119	1	FALSE	FALSE
ENSG00000180992.5	MRPL14	9.03676193599161	7.94267351923134	-	1.39373216258258e-06	FALSE	TRUE	FALSE	FALSE	NA	-	-	0.482	0	0	0.428956204289893	0.119271141585749	0	0.660485221622441	FALSE	FALSE	0.146063235121195	0	0.634200899679382	FALSE	0.231342039455404	-1	-1	1	0.650606956561324	-0.43665274453822	1	0.161495435138122	-0.0192132786675266	0.465177796056794	FALSE	rs7771912	1	FALSE	FALSE
ENSG00000171530.8	TBCA	3.33347100825877	1.1877955193245	-	1.40276364078566e-06	FALSE	TRUE	FALSE	FALSE	NA	-	-	0.0489	0.406268138918049	0	0.6887909827287	0	0	0.707932980218617	FALSE	FALSE	0.180469075954577	0	0.588170665467051	FALSE	0.172659071964435	1	-1	1	-1	-1	1	0.117852526332076	0.0192151256450096	0.51419567551709	FALSE	rs168189	1	FALSE	FALSE
ENSG00000113088.5	GZMK	16.2683697284345	127.4337723536	-	1.42115757995807e-06	FALSE	TRUE	FALSE	FALSE	NA	+	-	4.14e-05	0.472521706293471	0	0.664652007811935	0.401729529120197	0	0.765069532418692	FALSE	FALSE	0	0	0.320241663160579	FALSE	0.738760766879689	1	1	1	0.0850179338384571	-1	1	0.523232644156123	0.386731633753006	0.761159926696514	FALSE	rs2161565	1	TRUE	FALSE
ENSG00000114125.9	RNF7	5.54772768851416	1.46593719718229	-	1.42939316296654e-06	FALSE	TRUE	FALSE	FALSE	NA	-	+	0.0265	0.686925864298368	0.362636357632876	0.890406178116013	0	0	0.152807609517761	FALSE	TRUE	0	0	0.431674244727216	FALSE	0.246179494303973	1	1	1	-1	-1	1	-0.136385674036558	-0.311308755752641	0.290133625624845	FALSE	rs34566937	1	FALSE	FALSE
ENSG00000163050.11	ADCK3	9.63623704679866	4.31493752009263	+	1.43006165664201e-06	TRUE	FALSE	FALSE	FALSE	NA	+	-	0.036	0	0	0.605786358072952	0.605577098163227	0	0.878895716516372	FALSE	FALSE	0.360964264828733	0	0.659793977371578	FALSE	0.657849402611837	1	0.780666673203542	1	1	0.622191479958864	1	0.495730830256725	0.397945283918195	0.725643948189064	FALSE	rs78794064	1	FALSE	FALSE
ENSG00000143742.8	SRP9	10.0033989455185	30.9746937368704	-	1.43152997855635e-06	FALSE	TRUE	FALSE	FALSE	NA	-	NA	NA	0.618294430936452	0	0.819333630639339	0	0	0.305049418810578	FALSE	FALSE	0	0	0.412151030649606	FALSE	0.246123923312031	1	1	1	-1	-1	1	-0.202757092941096	-0.292365710706764	0.155812061953015	FALSE	rs528410	1	FALSE	FALSE
ENSG00000127948.9	POR	14.3422315802634	9.1883015195554	+	1.43900925068423e-06	TRUE	FALSE	FALSE	FALSE	NA	+	+	0.0138	0.401737697094893	0	0.776710629385245	0.352521159414281	0	0.728557601951334	FALSE	FALSE	0	0	0.518182913685125	FALSE	0.428285634898583	1	1	1	-1	-1	1	0.02197900361809	-0.154668259633293	0.415808336273746	FALSE	rs794349	1	FALSE	FALSE
ENSG00000228242.1	NA	9.4418144361834	4.89581840558063	+	1.44159589340466e-06	TRUE	FALSE	FALSE	FALSE	NA	+	NA	NA	0.324107981732578	0	0.591515940176637	0.534907964721389	0	0.666713564975223	FALSE	FALSE	0.349444876526547	0	0.668544183133134	FALSE	0.366212836899139	0.21385965137889	-0.222649170787965	1	0.00188776941603216	0.000853309839630786	1	0.271310863446194	0.117700952323664	0.590080202696531	FALSE	rs1550158	1	FALSE	FALSE
ENSG00000164096.10	C4orf3	33.5708287221338	67.600097888983	-	1.44838920899042e-06	FALSE	TRUE	FALSE	FALSE	NA	-	-	0.547	0	0	0.631738377533868	0.194136832162724	0	0.746835992294891	FALSE	FALSE	0	0	0.450845166132547	FALSE	0.260905807168658	1	1	1	0.301437186127691	-0.0113179707339674	1	-0.0778157867514999	-0.161998818320999	0.374517208062712	FALSE	rs11729954	1	FALSE	FALSE
ENSG00000108270.6	NA	23.8521815192528	17.5701456377511	+	1.46767581932177e-06	TRUE	FALSE	FALSE	FALSE	NA	+	NA	NA	0.152292538788825	0	0.677281992514496	0.46024454267223	0	0.830391199097406	FALSE	FALSE	0	0	0.432639516363187	FALSE	0.418449569324813	1	1	1	0.767679399649588	0.00199384293018011	1	0.1938727371536	0.04613991339193	0.519063387365287	FALSE	rs4796217	1	FALSE	FALSE
ENSG00000143486.10	EIF2D	9.88664450942737	3.4989576144701	-	1.4814048693136e-06	FALSE	TRUE	FALSE	FALSE	NA	-	-	4.52e-18	0.515614232955769	0	0.68030540635528	0	0	0.20800049519674	FALSE	FALSE	0.084295428828896	0	0.409578415856164	FALSE	0.376382328424562	1	0.999910271355803	1	0.00347628226872981	0.00301607785477088	1	0.212312118012634	0.107688885066217	0.491548716991917	FALSE	rs4951030	1	FALSE	FALSE
ENSG00000140280.9	LYSMD2	14.8213182971015	16.171004070465	-	1.50231024950477e-06	FALSE	TRUE	FALSE	FALSE	NA	-	-	0.0273	0	0	0	0	0	0.215444284228836	FALSE	FALSE	0	0	0.469160932832526	FALSE	0.212559044178939	-0.0457419195118368	0.0843784833958054	1	0.39444369058023	0.211633447378278	0.921895544870354	0.287953901669511	0.117567385638152	0.657753863950377	FALSE	rs55972942	1	FALSE	FALSE
ENSG00000132604.4	TERF2	7.82030487298196	1.9470331207402	+	1.52069651270999e-06	TRUE	FALSE	FALSE	FALSE	NA	+	-	0.000563	0	0	0.478607282501609	0	0	0.175774514567182	FALSE	FALSE	0	0	0.0883993889138988	FALSE	0.427785495971103	0.873268809534012	0.0312701365471157	1	0.464384085387842	-0.775315787674431	1	0.429448618743197	0.357487005424767	0.630278026873599	FALSE	rs193968	1	FALSE	TRUE
ENSG00000162972.6	C2orf47	2.71487376237624	0.458224119699892	-	1.52821382991741e-06	FALSE	TRUE	FALSE	FALSE	NA	-	-	0.00012	0.538833405321989	0.147715300083134	0.711876538789462	0.12629254315205	0	0.553090575858063	FALSE	FALSE	0.252994026397801	0	0.775227079039226	FALSE	-0.0756321200333426	0.350249951537428	0.0586647857801195	1	9.54147219137265e-05	-0.000973252906526262	0.00402593936273627	-0.178442841060279	-0.325008363434932	0.172652070661876	FALSE	rs10931901	1	FALSE	FALSE
ENSG00000237991.2	RPL35P1	9.17068362533693	26.4898059761796	-	1.54190663711698e-06	FALSE	TRUE	FALSE	FALSE	NA	-	NA	NA	0.404812855877351	0	0.672005586241506	0.269954309429527	0	0.742904879113827	FALSE	FALSE	0	0	0.655610708110027	FALSE	0.143428730202834	1	-0.172993894012791	1	-1	-1	1	-0.147983531395877	-0.268858150588464	0.353935729256761	FALSE	rs12139283	1	FALSE	FALSE
ENSG00000138668.14	HNRNPD	23.6779628746594	15.5911488938351	+	1.60191873969293e-06	TRUE	FALSE	FALSE	FALSE	NA	+	-	2.11e-12	0.159286110640632	0	0.569282828719011	0.104737153373071	0	0.518799701795972	FALSE	FALSE	0	0	0.322122302794119	FALSE	0.401889413726035	0.331304317939099	-0.958665586961903	1	0.0286115148254257	-1	1	0.216429764500172	0.137721818912313	0.410575228718582	FALSE	rs13129402	1	FALSE	FALSE
ENSG00000089597.11	GANAB	40.5312087153627	46.6219687787168	+	1.63185330038422e-06	TRUE	FALSE	FALSE	FALSE	NA	+	-	0.0759	0	0	0.225650601059922	0	0	0.642064166432022	FALSE	FALSE	0	0	0.224708060705204	FALSE	0.505862739649903	1	0.395255798613846	1	0.558615993106639	0.168576881614994	1	0.359549312844923	0.280189397085857	0.64060571033168	FALSE	rs12800927	1	FALSE	FALSE
ENSG00000104388.10	RAB2A	7.27843666932483	3.13049632753793	-	1.64387299066028e-06	FALSE	TRUE	FALSE	FALSE	NA	-	+	1.12e-06	0	0	0.521361012247601	0	0	0.175653603891704	FALSE	FALSE	0	0	0.187800250841884	FALSE	0.433175882189497	0.87871403533232	0.899075004115446	1	0.705250899918199	0.24630558638528	1	0.0543681880399549	-0.025895575115941	0.354841583691951	FALSE	rs4738793	1	FALSE	FALSE
ENSG00000113460.8	BRIX1	1.30658494806233	0.158296355086904	-	1.66385678551053e-06	FALSE	TRUE	FALSE	FALSE	NA	-	-	3.24e-14	0.612218785665465	0.0176240814075501	0.820858158992283	0.0777546085735382	0	0.413655181392562	FALSE	FALSE	0.404633536766337	0	0.66924989113876	FALSE	0.141594887468741	-0.437190904877345	-1	1	-0.00151627346984159	-1	1	0.28025847713745	0.12227068290508	0.587234195193657	FALSE	rs390056	1	FALSE	FALSE
ENSG00000231686.1	NA	4.25849126139818	1.17196652306231	+	1.6656347606305e-06	TRUE	FALSE	FALSE	FALSE	NA	+	NA	NA	0.091677603185247	0	0.401007832581308	0.197691489847677	0	0.454800773043421	FALSE	FALSE	0.145384882666767	0	0.469705303257284	FALSE	0.238510697415949	0.171372677375717	-1	1	0.000867650924632672	0.000797463061292939	1	0.184016973952779	0.0575264253820215	0.405097421624359	FALSE	NA	NA	FALSE	FALSE
ENSG00000100902.6	PSMA6	2.2793673639035	1.16679637581742	-	1.66914049310735e-06	FALSE	TRUE	FALSE	FALSE	NA	-	NA	NA	0.485080831770194	0	0.642313159706288	0.241542835724863	0	0.568399012300642	FALSE	FALSE	0	0	0.473972630949077	FALSE	0.288469019171992	1	-0.0963083315977469	1	-1	-1	1	0.0765602117024445	-0.0840897663038982	0.426093041269376	FALSE	rs10483453	1	FALSE	FALSE
ENSG00000183172.7	SMDT1	16.4353797024144	28.9556584115527	-	1.67832472641601e-06	FALSE	TRUE	FALSE	FALSE	NA	-	-	6.44e-14	0.784408319914443	0.283999322520291	0.877192015255046	0	0	0.585307751385078	FALSE	TRUE	0	0	0.522122057271369	FALSE	0.467629897193665	1	1	1	-1	-1	0.8935018307872	0.373541493885649	0.209241172324909	0.616055710088656	FALSE	rs5751276	1	FALSE	FALSE
ENSG00000259948.2	NA	69.7175782865583	318.556154560603	+	1.70666253322418e-06	TRUE	FALSE	FALSE	FALSE	NA	+	NA	NA	0	0	0.436569913186052	0.171856037193173	0	0.688635887779439	FALSE	FALSE	0	0	0	FALSE	0.585996110030564	1	1	1	0.0027808059145719	0.000874372516473265	1	0.0899545413991053	-0.0301418274263626	0.550824002526312	FALSE	rs12440535	1	FALSE	FALSE
ENSG00000207790.1	NA	3.3045859375	5.92117660773529	+	1.7156025288258e-06	TRUE	FALSE	FALSE	FALSE	NA	+	NA	NA	0.477278635981983	0	0.769652654766681	0	0	0.398074028865328	FALSE	FALSE	0.0282102454168833	0	0.536310913079586	FALSE	-0.104195609891637	-0.0209528722129944	-0.82523724340073	1	0.464810933231851	-0.520293798551491	1	-0.168376777054217	-0.28448519108462	0.13254376275919	FALSE	rs12094123	1	FALSE	FALSE
ENSG00000166896.3	ATP23	1.46941965592972	0.44359398257452	-	1.78148078284105e-06	FALSE	TRUE	FALSE	FALSE	NA	-	-	0.312	0.513627880848944	0	0.688247871650931	0.511053590025868	0.0305154673862212	0.846188412395074	FALSE	FALSE	0.340029235336118	0	0.607897244849406	FALSE	0.40427896637955	0.752599979481524	0.627280085784897	1	0.00325527953146666	0.00251337405050979	1	0.0369345719072838	-0.0966303761495863	0.507961790199934	FALSE	rs10877081	1	FALSE	FALSE
ENSG00000145817.11	YIPF5	5.38663207036536	1.51595977700589	-	1.78544902639944e-06	FALSE	TRUE	FALSE	FALSE	NA	-	-	0.52	0.686296198621317	0.172585603390226	0.849184853346047	0	0	0.449895291188719	FALSE	TRUE	0	0	0.583787022185022	FALSE	0.238566268407891	1	1	1	1	-1	1	0.03909503753108	-0.140935126410993	0.463439758820581	FALSE	rs10070261	1	FALSE	FALSE
ENSG00000168003.12	SLC3A2	13.2453937834992	6.47026019690391	+	1.81858524066473e-06	TRUE	FALSE	FALSE	FALSE	NA	+	+	0.0116	0.0842394672347759	0	0.572442118336202	0	0	0.672725079778713	FALSE	FALSE	0	0	0	FALSE	0.640955821061406	0.925207052434673	0.950100288832637	1	0.946051424912546	0.00492477330344337	1	0.392221932664479	0.315852283874428	0.637120663367609	FALSE	rs1939770	1	FALSE	FALSE
ENSG00000077721.11	UBE2A	12.1442484976887	5.42526067580415	-	1.83699693254887e-06	FALSE	TRUE	FALSE	FALSE	NA	-	+	0.000773	0.0448069333243392	0	0.724474052004181	0	0	0.560169282205797	FALSE	FALSE	0	0	0.657967486283286	FALSE	0.234787440955821	-0.965522368930263	-1	1	0.252897521054119	0.00565838923959897	1	0.131827005568517	0.0303769021672867	0.59532105526232	FALSE	NA	NA	FALSE	FALSE
ENSG00000065615.7	CYB5R4	17.9888718499427	35.8394903937308	-	1.84209240034287e-06	FALSE	TRUE	FALSE	FALSE	NA	-	+	4.14e-05	0	0	0.152732146764862	0	0	0.542998530313913	FALSE	FALSE	0	0	0	FALSE	0.490358432898027	0.965574058682717	0.869408209871265	1	0.751280359421374	-0.00318031997417023	1	0.381794449297064	0.312296537010627	0.56839905117484	FALSE	rs7751382	1	FALSE	FALSE
ENSG00000140694.12	PARN	7.24201445070099	1.7648223311068	+	1.86311690664761e-06	TRUE	FALSE	FALSE	FALSE	NA	+	-	0.000493	0	0	0.489958807068515	0.335852088819416	0	0.649098862443678	FALSE	FALSE	0	0	0.285240300367955	FALSE	0.440844679077522	1	0.95846272690341	1	0.989931462927359	0.521988638229127	1	0.155716110997225	0.0787523404014162	0.413991980658458	FALSE	rs72774861	1	FALSE	FALSE
ENSG00000071553.12	ATP6AP1	34.1927876410256	22.7961453658866	+	1.86451391376332e-06	TRUE	FALSE	FALSE	FALSE	NA	+	+	0.0346	0	0	0.605589129624691	0	0	0.673914940632936	FALSE	FALSE	0	0	0.139939396177157	FALSE	0.406835232008891	1	1	1	-1	-1	1	-0.0587605937981575	-0.126856731704701	0.236914009936123	FALSE	NA	NA	FALSE	FALSE
ENSG00000197756.5	RPL37A	52.539285654292	516.569871390706	-	1.8788906166219e-06	FALSE	TRUE	FALSE	FALSE	NA	-	-	0.00161	0.752161704008632	0.263112538841599	0.846488452119132	0	0	0.600398509684477	FALSE	TRUE	0	0	0.344047428365826	FALSE	0.139761044734649	1	1	1	-1	-1	-0.00614440913456569	0.0658794105274558	-0.140738555406	0.431879177051761	FALSE	rs13030494	1	TRUE	FALSE
ENSG00000197956.4	S100A6	584.228694401445	35886.5279939772	-	1.88270980172117e-06	FALSE	TRUE	FALSE	FALSE	NA	-	+	0.000257	0.200420294689935	0	0.613198893084165	0.173056543604702	0	0.745605804334251	FALSE	FALSE	0	0	0.213372379027623	FALSE	0.163489858293971	1	1	1	-1	-1	1	-0.00525674885200852	-0.112167956536378	0.338095495458774	FALSE	rs10888541	1	FALSE	FALSE
ENSG00000114383.5	TUSC2	14.8947124635569	4.59333802846139	-	1.88515346166077e-06	FALSE	TRUE	FALSE	FALSE	NA	-	-	0.24	0.337512952571564	0	0.541999080783677	0	0	0.124099798180362	FALSE	FALSE	0	0	0.231836955063764	FALSE	0.224340094470686	1	-0.519992872778324	1	0.0431085577960958	-0.214961909394302	1	0.00838188356657936	-0.141447630300576	0.303636071222522	FALSE	rs80094684	1	FALSE	FALSE
ENSG00000250182.2	EEF1A1P13	9.47385307332854	13.2965367445707	-	1.90652548471132e-06	FALSE	TRUE	FALSE	FALSE	NA	-	NA	NA	0.356734758226464	0	0.740918322895088	0.231216766394089	0	0.510590214572868	FALSE	FALSE	0.463143477536436	0	0.645448135911962	FALSE	0.193164767991109	-0.988441122046935	-1	1	1	-0.756743057035407	1	0.214936602162222	0.049002028136608	0.520475092644199	FALSE	rs343869	1	TRUE	FALSE
ENSG00000116750.8	UCHL5	1.86094206891741	0.477553296370637	-	1.90693699546932e-06	FALSE	TRUE	FALSE	FALSE	NA	-	-	0.687	0	0	0.236062304643337	0	0	0.287951936096892	FALSE	FALSE	0	0	0	FALSE	0.158377327035288	1	0.955900787935709	1	-0.18908198054754	-1	1	0.093935061808799	-0.0253798462817171	0.428378805479964	FALSE	rs7551019	1	FALSE	FALSE
ENSG00000206337.6	HCP5	51.1104914246969	93.1767249097398	-	1.91994158431852e-06	FALSE	TRUE	FALSE	FALSE	NA	+	+	0.00561	0.503531349243891	0	0.81768862797252	0.30616353694351	0	0.736210307949509	FALSE	FALSE	0	0	0.087421069373626	FALSE	0.78816337871631	1	1	1	0.00645442141907737	0.00572136943201324	1	0.211808263664311	0.0946066675321436	0.527610022319963	FALSE	rs114988900	1	FALSE	FALSE
ENSG00000154813.5	DPH3	3.75080993535694	1.26990439008052	-	1.93904251467549e-06	FALSE	TRUE	FALSE	FALSE	NA	-	+	2.84e-06	0.48118856190578	0	0.704333046118109	0	0	0.589544533997673	FALSE	FALSE	0.0494952614439029	0	0.774717309198886	FALSE	0.255793275909975	1	0.359086727633462	1	-1	-1	1	0.105330629419512	-0.0521213539426062	0.580700953605152	FALSE	rs7624893	1	FALSE	FALSE
ENSG00000137210.7	TMEM14B	1.95526078399213	0.324369199853347	-	1.96277802158381e-06	FALSE	TRUE	FALSE	FALSE	NA	-	-	0.0928	0.694863419790183	0.0128198183295516	0.817920478409623	0.375835242817317	0	0.709307311805549	FALSE	FALSE	0	0	0.547628644351497	FALSE	0.171047513198111	0.333127184912134	0.542830274879815	1	-0.00499322013055198	-1	-0.00323887904893136	-0.164558421418644	-0.269334657776633	0.186705058676846	FALSE	rs1206920	1	FALSE	FALSE
ENSG00000131174.4	COX7B	1.40066237582781	0.847949688340737	-	1.97652078868376e-06	FALSE	TRUE	FALSE	FALSE	NA	+	+	0.0457	0	0	0.600779047962708	0	0	0.255860214411755	FALSE	FALSE	0	0	0.452707998926317	FALSE	0.215504306751876	0.991890857916479	-0.252427034861013	1	-0.136976251742262	-1	1	0.117110341006653	-0.00730008703322955	0.375676485966172	FALSE	NA	NA	FALSE	FALSE
ENSG00000158941.12	CCAR2	23.6790931598342	13.3795888543482	+	1.9862057877173e-06	TRUE	FALSE	FALSE	FALSE	NA	+	+	0.104	0	0	0.484130950421317	0	0	0.533480706178865	FALSE	FALSE	0	0	0.352715280929827	FALSE	0.64256737982773	0.865720608578259	0.830156913913996	1	0.769395334099701	0.645496325436047	1	0.456004144970064	0.343003096403913	0.70259656945353	FALSE	rs11135705	1	FALSE	FALSE
ENSG00000119421.5	NDUFA8	8.0021090504451	3.90978168535629	-	1.99546535736315e-06	FALSE	TRUE	FALSE	FALSE	NA	+	-	0.267	0.524261352239147	0	0.683610563225653	0	0	0.661573606619188	FALSE	FALSE	0.0687362103726365	0	0.633157255750803	FALSE	0.116254515143095	-0.77003025352249	-1	1	-1	-1	1	0.187168220944408	0.0274378880249902	0.552230981704134	FALSE	rs585630	1	FALSE	FALSE
ENSG00000127774.6	EMC6	12.1084121577575	9.54311490864698	-	2.03578439933659e-06	FALSE	TRUE	FALSE	FALSE	NA	-	+	0.00864	0.0833468642592919	0	0.474502394390692	0	0	0.0235298504991219	FALSE	FALSE	0	0	0.502361662908875	FALSE	0.219783273131425	-0.140492489943746	-1	1	-0.615063781046603	-1	1	0.204140018324988	0.0418414248942647	0.575379465771488	FALSE	rs8069423	1	FALSE	FALSE
ENSG00000139641.8	ESYT1	38.344993501739	75.2406013814432	+	2.03973713435335e-06	TRUE	FALSE	FALSE	FALSE	NA	+	-	4.34e-14	0	0	0.32005481000116	0	0	0.490032200772502	FALSE	FALSE	0	0	0	FALSE	0.6463462072798	0.922526587270248	0.848861703990695	1	0.681926729990029	0.324087004122932	1	0.488942091784077	0.429992376755525	0.639616230021329	FALSE	rs7980181	1	FALSE	FALSE
ENSG00000011052.16	NME1-NME2	31.8157259878419	88.8958726668722	-	2.072784629602e-06	FALSE	TRUE	FALSE	FALSE	NA	-	NA	NA	0.650672281412104	0.21353659091249	0.819486302905974	0	0	0.480361951907502	FALSE	FALSE	0.562125660403185	0	0.766957984591007	FALSE	0.27279799944429	-1	-1	1	0.100012259206009	-1	1	0.361912865574522	0.244577954736176	0.633192369190372	FALSE	rs62062993	1	FALSE	FALSE
ENSG00000106554.7	CHCHD3	8.75255157198015	3.63336131412186	-	2.07771805793767e-06	FALSE	TRUE	FALSE	FALSE	NA	-	+	0.569	0.455161746730685	0.00499731552662189	0.695764294381054	0	0	0.427177631849684	FALSE	FALSE	0.390686658767844	0	0.672851359926236	FALSE	0.311030841900528	-1	-1	1	-0.988865898028172	0.000627946424700713	1	0.273804252203819	0.117635514459344	0.552571058713932	FALSE	rs1421308	1	TRUE	FALSE
ENSG00000215472.4	RPL17-C18orf32	11.8935355392157	54.6713569962199	-	2.08213655085439e-06	FALSE	TRUE	FALSE	FALSE	NA	-	NA	NA	0.424475536572007	0	0.662100150268341	0	0	0.270160098677072	FALSE	FALSE	0	0	0.579328990796294	FALSE	0.0507918866351764	1	-0.990315523066215	1	-1	-1	1	-0.0904394140295719	-0.185968437497919	0.316384675535693	FALSE	rs299752	1	FALSE	FALSE
ENSG00000109111.10	SUPT6H	23.7979001810282	20.6507958529807	+	2.0911904899034e-06	TRUE	FALSE	FALSE	FALSE	NA	+	-	0.43	0	0	0.484846671862675	0	0	0.610903087055173	FALSE	FALSE	0	0	0	FALSE	0.363267574326202	1	1	1	0.472095469163157	0.016228004415872	1	0.0302686523464446	-0.110226519004558	0.189818474451156	FALSE	rs1638003	1	FALSE	FALSE
ENSG00000130749.5	ZC3H4	9.11818577486507	3.61708701606918	+	2.11215971324286e-06	TRUE	FALSE	FALSE	FALSE	NA	+	NA	NA	0	0	0.521862643066876	0	0	0.617393981827916	FALSE	FALSE	0	0	0.0705509290699485	FALSE	0.229341483745485	1	0.336230902856248	1	-1	-1	0.729812025409838	0.154932347309675	0.0221451887474877	0.519322382401555	FALSE	rs7258779	1	FALSE	FALSE
ENSG00000135372.4	NAT10	7.77164309021113	3.48079571613682	+	2.11680345508296e-06	TRUE	FALSE	FALSE	FALSE	NA	+	-	3.47e-27	0	0	0.473675312007857	0.1399171341201	0	0.612882106290837	FALSE	FALSE	0	0	0.517096892857163	FALSE	0.642845234787441	0.512947514290022	0.140216047906724	1	0.580706656868296	0.0613499807093087	1	0.539194489266909	0.502079430224384	0.721201036970323	FALSE	rs4447153	1	FALSE	FALSE
ENSG00000108788.7	MLX	27.7182373160341	11.4774048359167	-	2.11786624650958e-06	FALSE	TRUE	FALSE	FALSE	NA	-	+	0.00403	0.572216250237193	0.213789442752447	0.761164868451418	0.505037490181461	0.00149314433718607	0.760209428599079	FALSE	FALSE	0.665405795266553	0	0.797033832251322	FALSE	0.311642122811892	0.40208135429101	0.228769790601953	1	-1	-1	1	0.0936627936703223	-0.0578270675095294	0.422810254342776	FALSE	rs8069972	1	FALSE	FALSE
ENSG00000125995.11	ROMO1	10.9945691071429	17.5915619153342	-	2.12503781047347e-06	FALSE	TRUE	FALSE	FALSE	NA	+	NA	NA	0	0	0.565554143869721	0.236980638206603	0	0.770159279379245	FALSE	FALSE	0	0	0.282061273452965	FALSE	-0.0246179494303973	NA	-1	1	NA	-1	1	NA	-0.121518904357508	0.364950001266464	FALSE	rs17092378	0.302663983345701	TRUE	FALSE
ENSG00000225573.3	RPL35P5	8.71408672086721	25.0750850471247	-	2.13242896207915e-06	FALSE	TRUE	FALSE	FALSE	NA	+	NA	NA	0.250410642769182	0	0.395140521037168	0.446153681083241	0	0.826971662204003	FALSE	FALSE	0.437734157304513	0	0.699801241093999	FALSE	0.363378716310086	-1	-1	1	1	-1	1	0.357520619653598	0.215555886306565	0.630875408685427	FALSE	rs6956666	1	FALSE	FALSE
ENSG00000112306.7	RPS12	344.375380913272	29311.4504304169	-	2.20852853603639e-06	FALSE	TRUE	FALSE	FALSE	NA	-	NA	NA	0.697227684367943	0	0.784935616312395	0	0	0.309734347391941	FALSE	FALSE	0	0	0.389176252113669	FALSE	0.0377882745207002	1	1	1	-1	-1	1	-0.191254944592013	-0.401077260552647	0.237448498563656	FALSE	rs2842903	0.915722432486048	TRUE	FALSE
ENSG00000161011.15	SQSTM1	45.8724537624216	37.5183582358655	+	2.28154511322866e-06	TRUE	FALSE	FALSE	FALSE	NA	-	-	0.939	0.550774697804899	0	0.767949887095626	0.0602862824246022	0	0.796342375177811	FALSE	FALSE	0	0	0.478516055858888	FALSE	0.644178938594054	1	1	1	-1	-1	1	0.282252920562631	0.176657381182114	0.531940479968209	FALSE	rs1001262	1	FALSE	FALSE
ENSG00000163399.11	ATP1A1	30.1789697524889	46.9479380648676	+	2.34765816488092e-06	TRUE	FALSE	FALSE	FALSE	NA	+	-	0.00164	0	0	0.410769694631863	0.080478547328805	0	0.671879471570445	FALSE	FALSE	0	0	0.245780757278795	FALSE	0.665073631564324	0.52006799612823	0.525367934733154	1	0.521893820347311	0.396152346456808	1	0.564687667260511	0.528096788429727	0.743193246575462	FALSE	rs10802189	1	FALSE	FALSE
ENSG00000243678.6	NME2	33.2761695286195	100.199183856609	-	2.34903950973942e-06	FALSE	TRUE	FALSE	FALSE	NA	-	-	0.000581	0.648536470131919	0.152860373335254	0.825223773791959	0	0	0.607638986095367	FALSE	FALSE	0.504366928954082	0	0.756292886437395	FALSE	0.304195609891637	-1	-1	1	-1	-1	1	0.410278274819486	0.276478361890024	0.660710672826462	FALSE	rs62062993	1	FALSE	FALSE
ENSG00000196139.5	AKR1C3	0.722503251960086	0.204349498414414	-	2.3949720620847e-06	FALSE	TRUE	FALSE	FALSE	NA	-	+	2.04e-12	0	0	0.633840248280898	0	0	0.462999163019857	FALSE	FALSE	0.327863808466768	0	0.624261230234642	FALSE	0.234676298971937	0.463207039975925	-1	1	1	0.0030640591079002	1	0.253770236859718	0.175019693926804	0.527371824509568	FALSE	rs7079701	1	FALSE	FALSE
ENSG00000044574.7	HSPA5	46.0397586858974	98.2934951389549	+	2.39881457861503e-06	TRUE	FALSE	FALSE	FALSE	NA	+	-	0.00248	0	0	0.451588876740525	0	0	0.403452217441829	FALSE	FALSE	0	0	0.302214552816155	FALSE	0.356487913309253	-0.535628781736376	-0.407458461034165	1	0.480107235972422	0.379380526103565	1	0.146240164086675	0.0507262480412667	0.491199564240847	FALSE	rs7038668	1	FALSE	FALSE
ENSG00000044115.15	CTNNA1	9.80987329841383	5.89218910434306	+	2.3995662937427e-06	TRUE	FALSE	FALSE	FALSE	NA	+	+	2.02e-21	0.172946602777429	0	0.632071302166747	0.602969716210025	0.116077162605198	0.822480140304426	FALSE	FALSE	0	0	0.336690396738367	FALSE	0.595998888580161	1	1	1	0.277843661366554	-0.0861536693615144	1	-0.26439251211812	-0.380581366409493	0.0752830839772684	FALSE	rs41298968	1	FALSE	FALSE
ENSG00000115677.12	HDLBP	16.2346955170426	8.05090060970187	+	2.4358704233256e-06	TRUE	FALSE	FALSE	FALSE	NA	+	+	0.104	0	0	0	0	0	0.615062382775194	FALSE	FALSE	0	0	0.0223444088805823	FALSE	0.402889691580995	1	0.99236791946053	1	0.867247779486363	0.668512471426468	1	-0.191970256143771	-0.26936344889155	0.0461360272492433	FALSE	rs2975767	1	FALSE	FALSE
ENSG00000258790.1	NA	7.32634594612181	4.72115737047868	-	2.45274090782815e-06	FALSE	TRUE	FALSE	FALSE	NA	+	-	0.000146	0.551123471767295	0	0.729862207817728	0.560231273343021	0.051909526844342	0.749780982255098	FALSE	FALSE	0.296355312997836	0	0.636206373442453	FALSE	0.513475965545985	0.45578107755587	0.392259552351607	1	-0.0015011628547426	-1	1	0.106523578996751	-0.0907659889140622	0.442429072614017	FALSE	rs11848931	0.873849327958655	TRUE	FALSE
ENSG00000179820.11	MYADM	172.973133072207	3477.70251118797	+	2.50047250057863e-06	TRUE	FALSE	FALSE	FALSE	NA	+	+	4.57e-05	0.734789528913398	0.0204657950013288	0.869157811091838	0.00785271314482085	0	0.842201671221609	FALSE	FALSE	0	0	0.642420417552514	FALSE	0.572992497916088	1	1	1	1	0.00404208228641017	1	0.171075575048563	0.00588893109561521	0.53189700972859	FALSE	rs4806712	1	FALSE	FALSE
ENSG00000143420.12	ENSA	15.4238101806878	5.14790656661244	-	2.53680109641997e-06	FALSE	TRUE	FALSE	FALSE	NA	-	+	0.000127	0.442308226496769	0	0.705801217454546	0	0	0.68690469518172	FALSE	FALSE	0.225845688972978	0	0.649099119081361	FALSE	0.34887468741317	1	-1	1	1	-0.384692267245734	1	0.284090756966373	0.140200724986581	0.529929605176613	FALSE	rs6665912	1	FALSE	FALSE
ENSG00000267276.1	NA	232.957427114804	2102.79035566863	+	2.61837248045056e-06	TRUE	FALSE	FALSE	FALSE	NA	-	NA	NA	0	0	0.627318009965927	0.360862495168471	0	0.734645338339833	FALSE	FALSE	0.312281577225854	0	0.731522989955004	FALSE	0.506140594609614	1	0.158720280703224	1	1	-1	1	0.468392372408972	0.250306906811071	0.670728166217299	FALSE	rs72974150	1	FALSE	FALSE
ENSG00000133706.13	LARS	7.61103865182437	2.77076799791407	+	2.67586776273947e-06	TRUE	FALSE	FALSE	FALSE	NA	+	-	1.1e-19	0	0	0.475630885591719	0.367531524963679	0	0.589762526067769	FALSE	FALSE	0	0	0.307446393811333	FALSE	0.654570714087247	1	0.578049945803215	1	1	0.0231577056910045	1	0.481881454734527	0.387923475681467	0.661927655080862	FALSE	rs13172860	0.152371157550508	TRUE	FALSE
ENSG00000171155.7	C1GALT1C1	4.03639786756453	1.98697434437176	-	2.6897826674939e-06	FALSE	TRUE	FALSE	FALSE	NA	-	-	0.0847	0.0378284555025286	0	0.615664694102522	0	0	0.744583043248977	FALSE	FALSE	0.084318581926389	0	0.692592295516493	FALSE	0.271186440677966	-0.407425529321318	-1	1	-0.172791338500275	-1	1	0.461447190684402	0.397045806284664	0.833521671147638	FALSE	NA	NA	FALSE	FALSE
ENSG00000197694.9	SPTAN1	20.7550675799087	32.4798750038763	+	2.6907326862269e-06	TRUE	FALSE	FALSE	FALSE	NA	+	-	0.00673	0	0	0.494849848430808	0.0654748543176479	0	0.686943516106777	FALSE	FALSE	0	0	0.318149737882589	FALSE	0.583439844401223	0.988179834184518	0.925585565576867	1	0.569114378654056	-0.160376253527798	1	0.519344484271554	0.452687220644944	0.70648335803268	FALSE	rs10988209	1	FALSE	FALSE
ENSG00000166130.10	IKBIP	5.49813636090406	4.28826282511849	-	2.70385847725026e-06	FALSE	TRUE	FALSE	FALSE	NA	-	-	0.408	0.349494251171583	0	0.706139779841544	0.0651183353211477	0	0.568682715238806	FALSE	FALSE	0	0	0	FALSE	0.41511530980828	1	0.986488678543214	1	-1	-1	1	0.320855065980215	0.24518352077675	0.670793068889156	FALSE	rs7313595	1	FALSE	FALSE
ENSG00000246203.2	NA	10.5224239282853	3.73533760060478	+	2.70866508890842e-06	TRUE	FALSE	FALSE	FALSE	NA	+	NA	NA	0	0	0.593280402848468	0	0	0.438029942266239	FALSE	FALSE	0.0264250469599698	0	0.595772273778612	FALSE	0.0790219505418172	-0.479479378125846	-1	1	0.212736796623344	-0.183336407174592	1	0.0813415274094977	-0.00653695164199089	0.467139896765413	FALSE	rs10908423	1	FALSE	FALSE
ENSG00000188206.5	NA	19.178724176231	23.5000245699417	+	2.70900528936051e-06	TRUE	FALSE	FALSE	FALSE	NA	-	NA	NA	0.44543131435617	0	0.632495845084798	0	0	0.47861709420558	FALSE	FALSE	0	0	0.15320672411175	FALSE	0.183717699360934	1	1	1	-1	-1	1	-0.0264119146053317	-0.113031396162218	0.201108812394632	FALSE	rs9645345	0.892298558442994	TRUE	FALSE
ENSG00000135185.7	TMEM243	3.66899704935622	1.82072159524095	-	2.7106905108766e-06	FALSE	TRUE	FALSE	FALSE	NA	-	-	2.17e-16	0.310110156422065	0	0.763933935592139	0	0	0.348750105821238	FALSE	FALSE	0.129909308550668	0	0.487753150415978	FALSE	0.137315921089191	0.718361342845181	0.879567764681976	1	1	0.0053187053277303	1	-0.113041664120581	-0.19604062114551	0.116152682438196	FALSE	rs7781450	1	FALSE	FALSE
ENSG00000061794.8	MRPS35	7.26912531725888	3.44663519467339	-	2.73730213838214e-06	FALSE	TRUE	FALSE	FALSE	NA	-	-	8.86e-06	0.171421544684803	0	0.667471820819801	0.27408599138324	0	0.682386330073514	FALSE	FALSE	0	0	0.433448045552328	FALSE	0.220672409002501	1	-0.565557558526729	1	-1	-1	1	0.148142246397744	0.0338169894526721	0.537854070870875	FALSE	rs16932846	1	FALSE	FALSE
ENSG00000110619.12	CARS	7.07986852351003	0.728342638244449	+	2.753243319586e-06	TRUE	FALSE	FALSE	FALSE	NA	+	+	0.289	0	0	0.231418340634077	0	0	0.608479693557825	FALSE	FALSE	0	0	0.459775865838044	FALSE	0.308752431230898	0.999832685095174	0.870855374485922	1	0.573865433615437	0.00273748587780023	1	0.236566960806844	0.114077069934389	0.515689575836921	FALSE	rs3852520	1	FALSE	FALSE
ENSG00000129353.10	SLC44A2	122.860072308877	332.369254444287	+	2.78377951395521e-06	TRUE	FALSE	FALSE	FALSE	NA	+	-	0.224	0.570179978542927	0.290325998643986	0.768741635752171	0.501985942193547	0	0.690436951151269	FALSE	FALSE	0	0	0.37330175281351	FALSE	0.543984440122256	1	1	1	-1	-1	1	0.086519484302062	-0.0485583313979681	0.452234745372815	FALSE	rs379309	1	FALSE	FALSE
ENSG00000087269.11	NOP14	11.0135017045455	5.07588051248347	+	2.82852868290507e-06	TRUE	FALSE	FALSE	FALSE	NA	+	-	2.04e-05	0	0	0.467228490242568	0.346097575871314	0	0.646039298357632	FALSE	FALSE	0	0	0.382514883187828	FALSE	0.533981661572659	1	0.302487612921786	1	0.442853909136216	-0.0163447167325279	1	0.509724906281841	0.463048430120347	0.699856249212252	FALSE	rs10027926	1	FALSE	FALSE
ENSG00000178464.6	NA	407.357661878882	13930.9059548166	-	2.84880559087493e-06	FALSE	TRUE	FALSE	FALSE	NA	-	NA	NA	0.679797142323052	0.195681863357103	0.800460033301507	0	0	0.223646941798041	FALSE	TRUE	0	0	0.455750870767311	FALSE	0.339094192831342	1	-0.890771203395755	1	-1	-1	1	0.224260517337797	0.067475237665675	0.558665078145212	FALSE	rs11673196	1	FALSE	FALSE
ENSG00000130119.11	GNL3L	10.740832037325	4.54287384056605	+	2.8644930213826e-06	TRUE	FALSE	FALSE	FALSE	NA	+	-	0.0216	0	0	0.592007600259485	0.324195101805715	0	0.693782059533409	FALSE	FALSE	0	0	0.26683664120563	FALSE	0.358544040011114	1	1	1	-0.0548082120940343	-1	1	-0.0155461369472086	-0.330265624188574	0.410900647310279	FALSE	NA	NA	FALSE	FALSE
ENSG00000169919.11	GUSB	14.206244224008	5.93741098339528	+	2.87017108325709e-06	TRUE	FALSE	FALSE	FALSE	NA	+	+	4.52e-07	0	0	0.499490517676241	0	0	0.374979717261259	FALSE	FALSE	0	0	0.261334985071798	FALSE	0.5244234509586	0.981315145555296	0.81189998652402	1	0.94271149014862	0.006255622229373	1	0.309986595479115	0.259453034035667	0.535222249973099	FALSE	rs17139635	1	FALSE	TRUE
ENSG00000084234.11	APLP2	53.0480141658806	105.982961139273	+	2.91225762302891e-06	TRUE	FALSE	FALSE	FALSE	NA	+	+	1.94e-10	0.171451497325381	0	0.721546181090999	0.35805276485957	0	0.804335332619789	FALSE	FALSE	0	0	0.297292188584553	FALSE	0.218560711308697	1	1	1	-0.816108298626976	-1	1	-0.437998159313501	-0.528948193629435	-0.181122577483667	FALSE	rs691943	1	TRUE	FALSE
ENSG00000110047.12	EHD1	67.0882189221641	144.365041406896	+	2.9901254454218e-06	TRUE	FALSE	FALSE	FALSE	NA	+	+	6.36e-06	0.11806579218689	0	0.567967907860952	0.025733990178671	0	0.687978804612197	FALSE	FALSE	0	0	0.0803982873073111	FALSE	0.489358155043068	1	1	1	-0.0750085409106539	0.00180867105589754	1	-0.106192049630583	-0.2464569928816	0.299443262677492	FALSE	rs116742819	1	FALSE	FALSE
ENSG00000234857.2	HNRNPUL2-BSCL2	39.3332937515715	43.8876219648019	+	3.03643711886613e-06	TRUE	FALSE	FALSE	FALSE	NA	+	NA	NA	0	0	0.344571683385651	0	0	0.546167770855915	FALSE	FALSE	0	0	0	FALSE	0.465851625451514	0.889275236402519	0.923174097474198	1	0.793504022185059	0.502570604537302	1	0.212089821812407	0.141184597425936	0.451159715492169	FALSE	rs61896567	1	FALSE	FALSE
ENSG00000119414.7	PPP6C	15.9875266407307	7.56343645584203	-	3.07004525287829e-06	FALSE	TRUE	FALSE	FALSE	NA	-	-	0.053	0.338651325224599	0	0.76179669348306	0.206804716753135	0	0.783708945179458	FALSE	FALSE	0	0	0.594560652642795	FALSE	0.213003612114476	1	1	1	0.206689882186103	0.00513933552129754	1	-0.402900817500774	-0.472202643820569	-0.015002473394343	FALSE	rs17355806	1	FALSE	FALSE
ENSG00000082641.11	NFE2L1	16.9464658073679	8.5666259231344	+	3.09061099310545e-06	TRUE	FALSE	FALSE	FALSE	NA	+	+	0.000748	0	0	0.323058075888073	0	0	0.404080612200789	FALSE	FALSE	0	0	0.16724832579579	FALSE	0.372158933036955	0.919626108299697	0.680689273483448	1	0.682014202036513	0.507536361926181	1	-0.0429916731586603	-0.162541117163297	0.278423969417036	FALSE	rs11570508	1	FALSE	FALSE
ENSG00000128266.7	GNAZ	2.5031243167621	1.59745117779242	+	3.09984703155302e-06	TRUE	FALSE	FALSE	FALSE	NA	+	NA	NA	0.491076677928471	0	0.77710120266308	0.714074199072793	0.218466586516261	0.822732822085147	FALSE	FALSE	0	0	0.285094654214803	FALSE	0.614781883856627	1	1	1	1	0.00465451683224987	1	0.0536048680638748	-0.232119211628825	0.411132882401378	FALSE	rs9608213	1	FALSE	TRUE
ENSG00000213280.2	NA	22.7261965883669	150.929921586053	-	3.10835544454896e-06	FALSE	TRUE	FALSE	FALSE	NA	+	NA	NA	0.0321451075698627	0	0.675661064172382	0	0	0.438533174937417	FALSE	FALSE	0	0	0.154942495424607	FALSE	0.0645734926368436	1	-0.170087064413043	1	-0.456938440962236	-1	1	-0.0915574453696058	-0.275975706302812	0.198466708456275	FALSE	rs11770604	1	FALSE	FALSE
ENSG00000150779.7	TIMM8B	1.91913252364574	1.18688325979419	-	3.13050312717663e-06	FALSE	TRUE	FALSE	FALSE	NA	+	-	0.644	0.373994591088436	0	0.647446901467197	0	0	0.347456096954431	FALSE	FALSE	0	0	0.185236412435047	FALSE	0.334537371492081	1	1	1	0.00381020732731348	0.00326037693221618	1	-0.0823875746822489	-0.17730306657603	0.167833064580769	FALSE	rs12363408	1	FALSE	FALSE
ENSG00000214921.2	NA	9.79001851851852	132.605989242862	+	3.13221213680455e-06	TRUE	FALSE	FALSE	FALSE	NA	+	NA	NA	0.261384314684246	0	0.60809319055239	0.463786141043547	0	0.805057317837072	FALSE	FALSE	0	0	0.240080963617998	FALSE	0.66674076132259	1	1	1	-1	-1	1	0.712919008989829	0.528142886490168	0.853999918246444	FALSE	rs2074439	1	FALSE	FALSE
ENSG00000178057.9	NDUFAF3	16.0960973837209	9.45399966954407	-	3.13518272073317e-06	FALSE	TRUE	FALSE	FALSE	NA	-	+	5.02e-07	0.467978784900824	0	0.667375855850985	0	0	0.502373348827015	FALSE	FALSE	0.400431085835159	0	0.603693067740457	FALSE	0.433564879133093	1	0.497280198195365	1	1	0.0981096174563472	1	0.279946383231261	0.198194013595797	0.458658415894311	FALSE	rs79672978	1	FALSE	FALSE
ENSG00000090339.4	ICAM1	14.9245544213088	13.533179700806	+	3.1545419742729e-06	TRUE	FALSE	FALSE	FALSE	NA	+	+	0.311	0	0	0.0338316197727484	0	0	0.63882450791788	FALSE	FALSE	0	0	0.354374918861264	FALSE	0.59244234509586	0.955041531592002	0.918864380349131	1	1	0.00782884662836464	1	0.433226672096587	0.328083272971178	0.687296344030167	FALSE	rs2738447	1	FALSE	FALSE
ENSG00000147533.11	GOLGA7	20.9658205270598	24.5195742285143	-	3.16828638415701e-06	FALSE	TRUE	FALSE	FALSE	NA	-	-	0.207	0.254051252807861	0	0.80597057822367	0.0524353011631376	0	0.646870901516377	FALSE	FALSE	0	0	0.183831176844681	FALSE	0.270686301750486	1	1	1	-0.672697542571103	-1	0.978369603023295	-0.06762481349467	-0.191929689886371	0.334528391277582	FALSE	rs4737023	1	FALSE	FALSE
ENSG00000112304.5	ACOT13	4.09616956150342	0.96075861349688	-	3.19631970418324e-06	FALSE	TRUE	FALSE	FALSE	NA	-	+	0.959	0.520720958706814	0	0.728528721869246	0.298858016418451	0	0.604798867536074	FALSE	FALSE	0	0	0.419817190936205	FALSE	0.0131703250903029	1	1	1	-1	-1	1	-0.426589488086345	-0.528241334262731	-0.118333018692717	FALSE	rs2747676	1	TRUE	FALSE
ENSG00000100266.12	PACSIN2	42.6577518254141	90.3939689507359	+	3.21020735782075e-06	TRUE	FALSE	FALSE	FALSE	NA	-	+	0.214	0.867357927130676	0.594584788494064	0.914173428373831	0	0	0.671752100404869	FALSE	TRUE	0	0	0.652978896165258	FALSE	0.649847179772159	1	0.751969817081524	1	1	-0.00143543308264783	1	0.416810255476053	0.329407010619186	0.725913741706369	FALSE	rs5759310	1	FALSE	FALSE
ENSG00000179933.4	C14orf119	12.8957805684297	4.54908697511111	-	3.25145452513179e-06	FALSE	TRUE	FALSE	FALSE	NA	-	NA	NA	0.612155352395953	0	0.717918749604769	0.144378502342938	0	0.720180220901718	FALSE	FALSE	0.0246463426685909	0	0.617967384230518	FALSE	0.284912475687691	1	0.63914393780178	1	-1	-1	1	0.248319412234257	0.124825690828916	0.5480708289542	FALSE	rs10872981	1	FALSE	FALSE
ENSG00000132341.5	RAN	12.015470966404	7.46333021935378	-	3.30215948264903e-06	FALSE	TRUE	FALSE	FALSE	NA	-	-	5.84e-06	0.510034710957836	0	0.746523317212341	0	0	0.0591528980515814	FALSE	FALSE	0	0	0.245871285072901	FALSE	0.284856904695749	1	-0.999999776197154	1	-1	-1	0.749863069146601	0.299621922700314	0.208191154709728	0.516152954677952	FALSE	rs11060602	1	FALSE	FALSE
ENSG00000154767.10	XPC	18.0837112871184	12.9688729464187	+	3.3364903282159e-06	TRUE	FALSE	FALSE	FALSE	NA	+	+	0.286	0.144299770830279	0	0.747414219565487	0.387762288700029	0	0.825489788980446	FALSE	FALSE	0	0	0.409172204313436	FALSE	0.30352875798833	1	0.570883934499886	1	-1	-1	1	0.213838966914865	0.0640085656099748	0.547744535463869	FALSE	rs62232966	1	FALSE	FALSE
ENSG00000196205.7	EEF1A1P5	166.016248704663	3444.02245603864	-	3.42021170690552e-06	FALSE	TRUE	FALSE	FALSE	NA	-	NA	NA	0.634956426287582	0	0.781971321792522	0	0	0.515610650364494	FALSE	FALSE	0.320268855261139	0	0.610372157269495	FALSE	0.368046679633232	1	-0.990466542579649	1	-1	-1	1	0.124167341223703	0.00358919755550195	0.477522730322931	FALSE	rs59210554	1	FALSE	FALSE
ENSG00000173230.11	GOLGB1	5.41293851973962	1.2457019205809	+	3.42755419559371e-06	TRUE	FALSE	FALSE	FALSE	NA	+	+	0.124	0	0	0.532837059351688	0.40222720272781	0	0.780441205653296	FALSE	FALSE	0.293813067307778	0	0.599295675675674	FALSE	0.268241178105029	-1	-1	1	1	0.583388379008656	1	0.257483433644755	0.0923730416654773	0.513869291347717	FALSE	rs11716629	1	FALSE	FALSE
ENSG00000153187.12	HNRNPU	40.2802614842552	64.8987210366604	+	3.44595909668011e-06	TRUE	FALSE	FALSE	FALSE	NA	+	-	5.16e-09	0	0	0.557601117306878	0	0	0.640038439465309	FALSE	FALSE	0.270272965137591	0	0.754589548072678	FALSE	0.386996387885524	-1	-1	1	0.398739229650146	0.258319395328824	1	0.381408399170464	0.289853134447085	0.653305469814093	FALSE	rs2365960	1	FALSE	FALSE
ENSG00000110090.7	CPT1A	10.8860897470193	13.5042140134146	+	3.50384107103123e-06	TRUE	FALSE	FALSE	TRUE	25	+	+	8.7e-21	0.656996114317927	0.0274504098346775	0.881680443557271	0.0963929245797467	0	0.697844067606054	FALSE	FALSE	0.51745044315988	0	0.791762010108035	FALSE	0.112697971658794	1	-1	1	-0.719813860979153	-1	1	0.134369463051037	-0.00262224573080062	0.572437953587794	FALSE	rs884826	0.152371157550508	TRUE	FALSE
ENSG00000166595.7	FAM96B	22.7839171757519	29.5240337350221	-	3.53152330873457e-06	FALSE	TRUE	FALSE	FALSE	NA	-	+	0.524	0.619696103810672	0.0751870648560056	0.78976528783984	0	0	0.568727314462091	FALSE	FALSE	0.0115351924153365	0	0.571853713350643	FALSE	0.30880800222284	-1	-1	1	-1	-1	0.793991209245862	0.311461351870198	0.0970747415968271	0.61779880563704	FALSE	rs233551	1	FALSE	FALSE
ENSG00000141682.11	PMAIP1	1.0309335639313	1.1253131316291	-	3.55722676178489e-06	FALSE	TRUE	FALSE	FALSE	NA	-	-	0.00636	0.238007763841483	0	0.721110924982243	0.242776889602465	0	0.734131239125709	FALSE	FALSE	0	0	0.353866440365589	FALSE	0.260072242289525	1	1	1	-1	-1	1	0.128339658595043	0.0373039612753686	0.440516309029849	FALSE	rs645492	1	FALSE	FALSE
ENSG00000165898.9	ISCA2	4.17276765860039	0.889846478743455	-	3.57947070056648e-06	FALSE	TRUE	FALSE	FALSE	NA	-	-	0.135	0.400136404143841	0	0.697475533132683	0	0	0.661623840625568	FALSE	FALSE	0	0	0.379849529720852	FALSE	0.286468463462073	1	1	1	-1	-1	1	-0.0314376961565344	-0.241933921821317	0.397325099775901	FALSE	rs11626122	1	FALSE	FALSE
ENSG00000170175.6	CHRNB1	1.83163651714583	0.211345249489899	-	3.62050112399602e-06	FALSE	TRUE	FALSE	FALSE	NA	-	-	0.047	0.404899369035968	0	0.675828856304721	0	0	0.322027810263939	FALSE	FALSE	0.104782903311188	0	0.566112591408973	FALSE	0.285245901639344	1	-0.550674981861068	1	0.0523074617822534	-1	1	0.0576900906952403	-0.0825548652971517	0.421406346526265	FALSE	rs2074219	1	FALSE	FALSE
ENSG00000214975.4	PPIAP29	11.3781149396378	13.6018447950223	-	3.64467378565442e-06	FALSE	TRUE	FALSE	FALSE	NA	-	NA	NA	0.170427211235207	0	0.496317443437216	0	0	0.509175950156025	FALSE	FALSE	0	0	0.342034017087814	FALSE	-0.111808835787719	1	0.331499778515343	1	-1	-1	0.58599171458331	-0.293567122047301	-0.440887891329547	0.0907196403950373	FALSE	rs6921603	1	FALSE	FALSE
ENSG00000141741.7	MIEN1	28.6527599118943	51.706493375223	-	3.68331496164267e-06	FALSE	TRUE	FALSE	FALSE	NA	+	-	0.681	0.541593123393092	0.00114385643808015	0.786548786236882	0	0	0.21603399315795	FALSE	FALSE	0.159648979005373	0	0.693194653863382	FALSE	0.307029730480689	1	0.999955628391816	1	-1	-1	-0.167700895822888	0.364453720835326	0.286917961139557	0.619069094943088	FALSE	rs4065275	1	FALSE	FALSE
ENSG00000104903.4	LYL1	35.9766681241977	96.0495810944455	+	3.69675544612875e-06	TRUE	FALSE	FALSE	FALSE	NA	-	+	1.52e-07	0	0	0.511994803010132	0.0170397127573303	0	0.717108906992891	FALSE	FALSE	0.179865384719203	0	0.446327324331727	FALSE	0.550319533203668	0.897867589344792	NA	NA	0.90268019475011	NA	NA	0.41884017283372	NA	NA	FALSE	rs6511887	1	FALSE	FALSE
ENSG00000110696.4	C11orf58	4.28084500764886	2.21524158769971	-	3.70772474813752e-06	FALSE	TRUE	FALSE	FALSE	NA	-	-	0.95	0.699997668609649	0.0534433594298765	0.804380325744663	0	0	0.574444533630419	FALSE	FALSE	0	0	0.438094287238977	FALSE	0.224006668519033	1	1	1	-1	-1	1	-0.190956125537487	-0.319209837945268	0.200896562218233	FALSE	rs4757547	1	FALSE	FALSE
ENSG00000260490.2	MYL12BP1	2.64966427865613	1.83809075731147	-	3.71603783869454e-06	FALSE	TRUE	FALSE	FALSE	NA	+	NA	NA	0	0	0.147529201161476	0	0	0.523387272258922	FALSE	FALSE	0	0	0.205720214361223	FALSE	0.307752153375938	-0.990659094909052	NA	NA	-0.53787755071383	NA	NA	0.395361352300717	NA	NA	FALSE	rs2290555	1	FALSE	FALSE
ENSG00000151332.12	MBIP	1.16008818221195	0.173032919609929	-	3.77557935473289e-06	FALSE	TRUE	FALSE	FALSE	NA	-	-	3.33e-05	0.426938398151021	0	0.785203279695095	0.29373010312008	0	0.558107353231328	FALSE	FALSE	0.426822077413748	0	0.825248524188862	FALSE	0.0889135871075299	0.412404739037133	-0.641034752336844	1	-1	-1	1	0.138785547082216	-0.0892942608229522	0.686623105402351	FALSE	rs8018714	1	FALSE	FALSE
ENSG00000198618.4	PPIAP22	97.5306400905433	1002.9545242121	-	3.80541856825543e-06	FALSE	TRUE	FALSE	FALSE	NA	-	NA	NA	0.601511277607113	0	0.695132273473219	0	0	0.426113297936968	FALSE	FALSE	0	0	0.532865349409624	FALSE	0.149986107252014	1	-0.962331652634714	1	-1	-1	0.502246545329961	0.168639116291395	0.074548045715202	0.385055298571656	FALSE	rs12483472	0.994752187295341	TRUE	FALSE
ENSG00000171298.8	GAA	32.8374379426738	88.7407423050117	+	3.82255267909177e-06	TRUE	FALSE	FALSE	FALSE	NA	+	+	7.59e-05	0.754531245485729	0.403273513288774	0.854547020216971	0.451195590557084	0	0.747123747871478	FALSE	FALSE	0	0	0.453947866034655	FALSE	0.581217004723534	1	1	1	1	0.00124068777932989	1	-0.354796790193107	-0.426488464910959	-0.0551033336000535	FALSE	rs7218352	1	FALSE	FALSE
ENSG00000156508.13	EEF1A1	95.4207277071405	1034.0766404033	-	3.87034820994471e-06	FALSE	TRUE	FALSE	FALSE	NA	-	-	0.16	0.531271539915939	0	0.708385261461237	0.0265563115115821	0	0.544044249831028	FALSE	FALSE	0.252208162620986	0	0.598539751495154	FALSE	0.330758544040011	-0.191694890810825	-1	1	-1	-1	1	0.123757102319966	-0.0266880942858972	0.417520982186619	FALSE	rs10498886	1	FALSE	FALSE
ENSG00000117242.7	PINK1-AS	24.5940613738739	11.2426029769932	+	3.98266912727957e-06	TRUE	FALSE	FALSE	FALSE	NA	+	NA	NA	0.46010964712412	0	0.753054371938216	0.253863968037239	0	0.590951740869471	FALSE	FALSE	0.133755866808122	0	0.446476198498932	FALSE	0.29369269241456	1	1	1	0.0022974997043307	0.00131794302912329	1	0.134390096912741	0.00815112895945511	0.35346868087265	FALSE	rs10917026	1	FALSE	FALSE
ENSG00000184983.4	NDUFA6	7.58171487968861	6.66781663703206	-	4.00992057183044e-06	FALSE	TRUE	FALSE	FALSE	NA	-	NA	NA	0.636223041068682	0.00603551215167031	0.847417072498233	0	0	0.356737067070997	FALSE	FALSE	0	0	0.478827503511674	FALSE	0.16121144762434	1	-0.56413166940941	1	-1	-1	0.00994676496550904	0.247248952979321	0.0632765591264983	0.478378656640044	FALSE	rs13054094	1	FALSE	FALSE
ENSG00000104131.8	EIF3J	6.5191119742624	2.66917513582932	-	4.03437307858751e-06	FALSE	TRUE	FALSE	FALSE	NA	-	-	5.55e-07	0.182169056946894	0	0.599568199474445	0.0757043778456284	0	0.757602620515559	FALSE	FALSE	0.405708515839703	0	0.804981054326571	FALSE	0.182828563489858	-1	-1	1	1	-1	1	0.327692994075036	0.22005234214481	0.641034434949597	FALSE	rs2696087	1	FALSE	FALSE
ENSG00000219023.1	NA	1.6246726342711	4.07353124591628	-	4.06433430004144e-06	FALSE	TRUE	FALSE	FALSE	NA	-	NA	NA	0.465958401133822	0	0.716545666949312	0.210148027819815	0	0.365561671615625	FALSE	FALSE	0	0	0.534030528011134	FALSE	0.287190886357321	0.52653761812841	0.169006471770589	1	-0.000664970895146038	-1	1	-0.00350020266612338	-0.198560893505364	0.540167157693804	FALSE	rs6928769	1	FALSE	FALSE
ENSG00000054654.11	SYNE2	3.84024392066893	1.47962521441805	+	4.06717155459902e-06	TRUE	FALSE	FALSE	FALSE	NA	+	+	3.7e-06	0.664918197867472	0.222926663450359	0.756022186822269	0.585022458872422	0.285930596763118	0.748875175394124	FALSE	FALSE	0.257719447195559	0	0.670080362641882	FALSE	0.449291469852737	0.671612301004179	0.623756938464761	1	-0.00241710026628902	-1	1	0.245138102708288	0.0479980431418797	0.688685531737298	FALSE	rs6573516	1	FALSE	FALSE
ENSG00000134248.8	LAMTOR5	13.2126606918239	9.65979985630412	-	4.08253778031614e-06	FALSE	TRUE	FALSE	FALSE	NA	-	+	0.00741	0.477753298039651	0	0.746457409521563	0	0	0.335344669966384	FALSE	FALSE	0	0	0.4353403689987	FALSE	0.0893025840511253	1	0.821342459095835	1	-0.928995756176327	-1	1	-0.14833989184831	-0.300211969961897	0.406103231501417	FALSE	rs7519964	1	FALSE	FALSE
ENSG00000136146.9	MED4	8.62911882716049	4.92026496736343	-	4.09540036818369e-06	FALSE	TRUE	FALSE	FALSE	NA	-	-	0.000306	0.321593502581714	0	0.67586713763559	0	0	0.219181719085558	FALSE	FALSE	0.0319217378858193	0	0.451233323969199	FALSE	0.00916921367046402	0.276124496801839	-1	1	0.201144851091707	-0.074553962435892	1	-0.196070488145735	-0.336317710475226	0.10881882785746	FALSE	rs9595945	1	FALSE	FALSE
ENSG00000247853.2	NA	6.64742023701003	2.48473606131489	+	4.10241814043915e-06	TRUE	FALSE	FALSE	FALSE	NA	+	NA	NA	0.1462595124826	0	0.537623762347833	0	0	0.576770118589516	FALSE	FALSE	0	0	0.360466767052267	FALSE	0.293359266462906	0.348803258382608	-0.526936171255076	1	0.374982687618421	-0.0270110777652465	1	0.226725307470775	0.149008367387674	0.4223757415756	FALSE	rs2239160	1	FALSE	FALSE
ENSG00000139168.3	ZCRB1	2.15762869306524	0.520576728275298	-	4.12567816956436e-06	FALSE	TRUE	FALSE	FALSE	NA	-	-	0.0896	0.264459197586736	0	0.698696579543806	0.190853051543141	0	0.498799823284643	FALSE	FALSE	0	0	0.594049543889537	FALSE	0.0372881355932203	-0.813499051046173	-1	1	-1	-1	0.00959233659707946	0.132931920939004	0.0335577616751438	0.342286106513541	FALSE	rs12580002	1	FALSE	FALSE
ENSG00000125863.12	MKKS	4.0455252616384	1.82661001321382	-	4.18363568394668e-06	FALSE	TRUE	FALSE	FALSE	NA	-	-	4.74e-06	0.258469409411845	0	0.509620103208269	0	0	0.575754922922314	FALSE	FALSE	0.277702500361879	0	0.498146898051431	FALSE	0.301528202278411	0.0546176747275184	-0.999927042407573	1	-0.000449534143366593	-0.0444228657284514	1	0.186565324455141	0.10116691374384	0.483963100848687	FALSE	rs994919	1	FALSE	FALSE
ENSG00000109854.9	HTATIP2	13.3796844108166	5.04463717641653	-	4.24378218847346e-06	FALSE	TRUE	FALSE	FALSE	NA	+	+	1.47e-09	0	0	0.56443292437448	0.23153684971551	0	0.453665491937948	FALSE	FALSE	0	0	0	FALSE	0.0913031397610447	1	1	1	-1	-1	0.00129066468055637	0.159672190075204	-0.020778982167866	0.452916727340719	FALSE	rs1670646	1	FALSE	FALSE
ENSG00000198886.2	MT-ND4	2792.64345697168	810678.666405132	-	4.36345100343207e-06	FALSE	TRUE	FALSE	FALSE	NA	-	NA	NA	0.183230670040362	0	0.44089521597677	0	0	0.541664182647059	FALSE	FALSE	0	0	0.374719612159561	FALSE	0.0757988330091692	0.578314282843821	-0.657616948540258	1	1	-0.260908277939349	1	0.223632340187163	0.0907051895188705	0.476716432576146	FALSE	NA	NA	FALSE	FALSE
ENSG00000130821.11	SLC6A8	2.66186795935108	4.38516643109762	+	4.37042632137008e-06	TRUE	FALSE	FALSE	FALSE	NA	+	+	0.275	0.473516929958023	0.0279965173533134	0.682888006521131	0.417287743161795	0	0.786601923490038	FALSE	FALSE	0	0	0.538726814465405	FALSE	0.585218116143373	1	1	1	-1	-1	1	0.514964593455086	0.245013062368755	0.734412907186843	FALSE	NA	NA	FALSE	FALSE
ENSG00000178449.2	COX14	6.66625991114149	5.50692238163654	-	4.41704698051298e-06	FALSE	TRUE	FALSE	FALSE	NA	+	+	0.238	0.450028998652109	0	0.691469209770038	0	0	0.271312498381361	FALSE	FALSE	0	0	0.386462447632617	FALSE	0.0367324256737983	-0.862223120568359	-1	1	-1	-1	0.0762342562431297	0.220528118127428	0.0883789198443555	0.540309802697042	FALSE	rs10783341	1	FALSE	FALSE
ENSG00000156482.6	RPL30	55.707347170398	737.241415887253	-	4.43364787520949e-06	FALSE	TRUE	FALSE	FALSE	NA	-	-	1.23e-08	0.51596762169633	0	0.72288236759676	0	0	0.420816768532935	FALSE	FALSE	0	0	0.449677922523679	FALSE	0.223339816615727	1	-0.154391045479209	1	0.0585878050659982	-1	1	-0.0228767238025772	-0.185829391918236	0.305651321676259	FALSE	rs11778668	1	FALSE	FALSE
ENSG00000154518.5	ATP5G3	7.00028246274163	2.20806880615094	-	4.52268292063713e-06	FALSE	TRUE	FALSE	FALSE	NA	-	+	0.382	0.46006338044943	0.105198381571167	0.640107406967219	0	0	0.596636683699119	FALSE	FALSE	0.215013445789653	0	0.577094126799654	FALSE	0.259071964434565	-0.629559050769525	-1	1	-1	-1	1	0.360795411615502	0.206230291914044	0.60397461789036	FALSE	rs13032076	1	FALSE	FALSE
ENSG00000071127.12	WDR1	62.219431349308	53.0238279875611	+	4.59128598742545e-06	TRUE	FALSE	FALSE	FALSE	NA	+	+	3.88e-10	0.384065030197328	0	0.759217066462908	0.345858060054084	0	0.694617864640326	FALSE	FALSE	0	0	0.408553404676409	FALSE	0.486190608502362	1	1	1	0.00802266895947386	-0.003090203531723	1	0.0137880765361213	-0.176040907997345	0.409901434609941	FALSE	rs56328310	1	FALSE	FALSE
ENSG00000204370.4	SDHD	17.0037142941454	18.4688754986796	-	4.60360036922934e-06	FALSE	TRUE	FALSE	FALSE	NA	-	-	0.00231	0.132070082722302	0	0.532467683954132	0	0	0.691024983138993	FALSE	FALSE	0	0	0	FALSE	0.106029452625729	-0.955270506289316	-0.774087218669929	1	-0.558674754038564	-1	-0.0078429526729101	0.23127274059398	-0.028600930561777	0.419189984884811	FALSE	rs12282765	1	FALSE	FALSE
ENSG00000204070.5	SYS1	6.58643609883816	0.727784236541738	-	4.62305814762344e-06	FALSE	TRUE	FALSE	FALSE	NA	-	-	0.14	0.329340460814526	0	0.574822500003879	0.198348688068526	0	0.704494471467506	FALSE	FALSE	0.375522292847254	0	0.633644596226512	FALSE	0.23500972492359	1	0.381287462504226	1	-1	-1	1	-0.0027604681355303	-0.18786398407025	0.443510794049838	FALSE	rs67008180	1	FALSE	FALSE
ENSG00000068697.6	LAPTM4A	34.5072379448169	40.4517009111293	-	4.6332470385732e-06	FALSE	TRUE	FALSE	FALSE	NA	-	+	0.000272	0.418126568057887	0	0.754785954226046	0.372880119442901	0	0.781965149744465	FALSE	FALSE	0.259743678926079	0	0.654673779143895	FALSE	0.179383161989442	0.745595783046892	0.257112603131617	1	-1	-1	1	0.0592113482042282	-0.0319689299642283	0.524353864214213	FALSE	rs342077	1	FALSE	FALSE
ENSG00000122034.8	GTF3A	20.8338735358099	22.8495694704992	-	4.63606147290219e-06	FALSE	TRUE	FALSE	FALSE	NA	-	-	2.76e-07	0.418395413716899	0	0.741177049266238	0	0	0.426760589520722	FALSE	FALSE	0	0	0.494496105120382	FALSE	0.186051681022506	1	0.0969548515504045	1	-0.207044035711253	-1	1	0.0694717484034694	-0.0499752190572798	0.360441228691879	FALSE	rs9513075	1	FALSE	FALSE
ENSG00000108561.4	C1QBP	18.7739904793171	15.792398990157	-	4.752599869667e-06	FALSE	TRUE	FALSE	FALSE	NA	-	-	4.3e-30	0.46484719212337	0	0.667413416924092	0	0	0.440483710819446	FALSE	FALSE	0.110853728118414	0	0.635620212079063	FALSE	0.349152542372881	-0.81549298388996	-1	1	-1	-1	1	0.291422398436884	0.19379108765835	0.560634902161175	FALSE	rs2309410	1	FALSE	FALSE
ENSG00000150316.7	CWC15	4.54557217660858	1.93029543801674	-	4.78656473350325e-06	FALSE	TRUE	FALSE	FALSE	NA	-	-	0.00101	0.73259067178456	0.0372207749373774	0.90514603703754	0	0	0.662810511760393	FALSE	FALSE	0.135680736671599	0	0.615532133143653	FALSE	0.0479021950541817	-1	-1	1	-1	-1	1	0.280811526746391	0.183133997165822	0.524713257417556	FALSE	rs1271744	0.191765863466692	TRUE	FALSE
ENSG00000186001.8	LRCH3	4.12265992588776	0.613748932323967	+	4.85207816450383e-06	TRUE	FALSE	FALSE	FALSE	NA	+	-	0.365	0.26348633068533	0	0.591608197750876	0.239025896153939	0	0.57976732343418	FALSE	FALSE	0	0	0.150465498825358	FALSE	0.425618227285357	1	0.977344461300092	1	1	0.00139301420295221	1	0.2305970006062	0.151534530383598	0.387973461505933	FALSE	rs7616508	1	FALSE	FALSE
ENSG00000136813.9	KIAA0368	4.86442115665288	0.998776920077319	+	4.85781018847134e-06	TRUE	FALSE	FALSE	FALSE	NA	+	+	0.0338	0.333940422649618	0	0.786174755154642	0.0219371226626596	0	0.544875167679064	FALSE	FALSE	0.292567473810465	0	0.822927506393413	FALSE	0.370102806335093	-1	-1	1	0.53915679187276	-0.0107204368384549	1	0.422074105744002	0.245274739089184	0.733136912458558	FALSE	rs35526485	1	FALSE	FALSE
ENSG00000100142.8	POLR2F	3.09917935401252	0.403094249347705	-	4.87346433763827e-06	FALSE	TRUE	FALSE	FALSE	NA	+	-	0.101	0.382729227819017	0	0.644203848796319	0	0	0.245342017540381	FALSE	FALSE	0.11101776684202	0	0.670008687667698	FALSE	0.14081689358155	-1	-1	1	1	-1	1	0.191753183147276	0.0698012540925202	0.480256157989075	FALSE	rs12167091	1	TRUE	FALSE
ENSG00000259207.2	ITGB3	3.339005631797	4.40191055422568	+	4.90881926400541e-06	TRUE	FALSE	FALSE	FALSE	NA	-	+	2.38e-11	0	0	0.252949454039054	0.039457817633103	0	0.741985396895115	FALSE	FALSE	0	0	0.512764775393614	FALSE	0.640455682133926	1	0.981853542033545	1	0.743455833068951	0.629788414824566	1	0.493089509757208	0.11536552491034	0.718707596474948	FALSE	rs1452665	1	FALSE	FALSE
ENSG00000236330.1	RPL5P9	0.434044774011299	0.126435556300202	-	4.90899355062e-06	FALSE	TRUE	FALSE	FALSE	NA	-	NA	NA	0	0	0.384275476618422	0	0	0.285814873202497	FALSE	FALSE	0	0	0.261407494872028	FALSE	0.0841900527924424	0.995995418585374	0.988957387817989	1	1	-0.000326776853206668	1	-0.0399538027350531	-0.195313556521377	0.130947115044158	FALSE	rs11897634	1	FALSE	FALSE
ENSG00000170619.8	COMMD5	9.01402053202479	1.45074677837849	-	4.96943906398811e-06	FALSE	TRUE	FALSE	FALSE	NA	-	+	0.259	0.328428195501807	0	0.679168324668781	0	0	0.079417214458443	FALSE	FALSE	0.00452276421779651	0	0.516001068576074	FALSE	0.462739649902751	1	0.818582322967651	1	1	0.00711823555703476	1	0.013297993429649	-0.138159848754858	0.274024793953958	FALSE	rs2976637	1	FALSE	FALSE
ENSG00000178764.6	ZHX2	11.2038070329087	5.42936802622133	+	4.97782060743207e-06	TRUE	FALSE	FALSE	FALSE	NA	+	-	0.0256	0	0	0.545163711834221	0.482353592715605	0	0.711369659599373	FALSE	FALSE	0	0	0	FALSE	0.455793275909975	1	1	1	-1	-1	0.961015355744852	0.257324765250218	0.146654673949065	0.574455131710871	FALSE	rs4871347	1	TRUE	FALSE
ENSG00000143412.5	ANXA9	9.20336044426049	5.36153794806995	+	4.98791016789836e-06	TRUE	FALSE	FALSE	FALSE	NA	+	NA	NA	0.258300567324672	0	0.60431666408018	0.118474179930848	0	0.714945534952378	FALSE	FALSE	0.101977755366679	0	0.785075780526431	FALSE	0.432120033342595	0.599968542929284	0.201503649981665	1	0.197196486226633	-0.97609327209267	1	0.248642061619313	0.148406658056456	0.691079174953145	FALSE	rs16833376	1	FALSE	FALSE
ENSG00000136930.8	PSMB7	21.0716716674573	11.1332718555554	-	5.02491954495933e-06	FALSE	TRUE	FALSE	FALSE	NA	+	+	0.186	0.435273067648883	0	0.629440921265684	0	0	0.495118068642038	FALSE	FALSE	0.354806391839757	0	0.734514404526538	FALSE	0.263462072797999	-1	-1	1	-0.0182832327737591	-1	1	0.265860562188565	0.0684737070213452	0.501301068388311	FALSE	rs628554	1	FALSE	FALSE
ENSG00000100209.5	HSCB	2.49662027166437	0.619365467038879	-	5.07684731388961e-06	FALSE	TRUE	FALSE	FALSE	NA	-	+	0.749	0	0	0.431226567459915	0	0	0.342171058184844	FALSE	FALSE	0	0	0.359595622177192	FALSE	0.124979160878022	-0.980977799630766	-0.99999997572804	1	-1	-1	1	0.205542394682192	0.0922665789680925	0.41358897065135	FALSE	rs9625722	1	FALSE	FALSE
ENSG00000139239.6	RPL14P1	137.7913867713	2492.59524373135	-	5.09594457941039e-06	FALSE	TRUE	FALSE	FALSE	NA	-	NA	NA	0.758452449153681	0.310939247793642	0.843099984770926	0	0	0.321667772929259	FALSE	TRUE	0.336529494169089	0	0.729681540108438	FALSE	0.101194776326757	1	-0.433931711351792	1	-1	-1	0.190886328859023	0.300880779200797	0.171938736525348	0.566228870246044	FALSE	rs7978328	1	FALSE	FALSE
ENSG00000078687.12	TNRC6C	5.85299448824829	2.48330887064857	+	5.21775347977571e-06	TRUE	FALSE	FALSE	FALSE	NA	+	-	1.65e-06	0.177797696650907	0	0.716596977558483	0.410125529784111	0	0.611785745761413	FALSE	FALSE	0	0	0.390699449075423	FALSE	0.591386496248958	1	1	1	0.646113779490635	-0.034645353773444	1	0.46738206600648	0.355178425059115	0.679080581183135	FALSE	rs2033719	1	FALSE	FALSE
ENSG00000226937.2	CEP164P1	0.769126670457776	0.194515487313424	-	5.23269074448257e-06	FALSE	TRUE	FALSE	FALSE	NA	-	NA	NA	0.412345294790429	0	0.75620365620037	0	0	0.430300045743915	FALSE	FALSE	0.0887651427173707	0	0.424701729981988	FALSE	0.316976938038344	0.934394774041513	0.492723197106904	1	1	0.00842881138975465	1	0.0870968485439937	-0.0757444810083719	0.383547122971273	FALSE	rs2839679	1	FALSE	FALSE
ENSG00000155959.6	VBP1	3.25030677368833	3.14951111754568	-	5.23860367964655e-06	FALSE	TRUE	FALSE	FALSE	NA	-	-	0.000506	0.664247526638331	0.229439929721904	0.796555551455077	0	0	0.495587260667981	FALSE	TRUE	0	0	0.366601203398401	FALSE	0.123645457071409	1	1	1	-1	-1	1	-0.0768109628577395	-0.222034495140926	0.296937098653174	FALSE	NA	NA	FALSE	FALSE
ENSG00000141456.9	PELP1	11.655612573616	8.23684228492908	+	5.27935612475961e-06	TRUE	FALSE	FALSE	FALSE	NA	+	-	1.04e-05	0	0	0.564211380065544	0	0	0.320772526650002	FALSE	FALSE	0	0	0.520116478504604	FALSE	0.648346762989719	-0.966563272439428	-1	1	0.227623998827208	-0.842016673664851	1	0.634036903184578	0.590305653359544	0.772999369233613	FALSE	rs2271167	1	FALSE	FALSE
ENSG00000111843.9	TMEM14C	7.03866948669202	5.98471110362509	-	5.28717578165233e-06	FALSE	TRUE	FALSE	FALSE	NA	-	-	4.3e-06	0.587459115183129	0	0.775042410693671	0	0	0.492044549847208	FALSE	FALSE	0.248657395744016	0	0.554400655920827	FALSE	0.236454570714087	1	0.382745662970275	1	1	0.00858917728643636	1	0.0981462758691754	-0.0798797356488802	0.49457943938422	FALSE	rs59175745	1	FALSE	FALSE
ENSG00000065518.7	NDUFB4	15.8786974695284	13.2778538080582	-	5.29352863945313e-06	FALSE	TRUE	FALSE	FALSE	NA	-	NA	NA	0.689949767032846	0	0.755377067350157	0	0	0.582043114071021	FALSE	FALSE	0.267286651203251	0	0.775762350648694	FALSE	0.0610169491525424	1	1	1	-1	-1	0.0342104754188065	0.0679810556487319	-0.0848019253522153	0.435471232585189	FALSE	rs11922605	1	FALSE	FALSE
ENSG00000139617.10	NA	5.74391201391366	2.82882492264227	+	5.36403041117669e-06	TRUE	FALSE	FALSE	FALSE	NA	+	NA	NA	0	0	0.485371167598878	0	0	0.431814403985918	FALSE	FALSE	0	0	0.496319633534147	FALSE	0.258627396499028	1	1	1	-1	-1	1	0.181699051867414	0.04492482743406	0.529183777930306	FALSE	rs17596576	1	FALSE	FALSE
ENSG00000189091.8	SF3B3	10.4840771505655	5.73599954814664	+	5.37566732168047e-06	TRUE	FALSE	FALSE	FALSE	NA	+	-	0.00035	0	0	0.399957081987869	0	0	0.50309662449704	FALSE	FALSE	0	0	0.313004763618463	FALSE	0.565768268963601	0.768609875552288	0.443814181020559	1	0.586271371991881	0.412065258415514	1	0.436943543685498	0.378754604115682	0.653539882896011	FALSE	rs76092219	1	FALSE	FALSE
ENSG00000116871.11	MAP7D1	49.395209847764	80.4749381493699	+	5.37912807997115e-06	TRUE	FALSE	FALSE	FALSE	NA	-	-	0.416	0.293561669778295	0	0.703636110567014	0.186742817398196	0	0.694956562277776	FALSE	FALSE	0	0	0.453920059060987	FALSE	0.568880244512365	1	1	1	-1	-1	1	0.239669646345828	0.164027952706899	0.493617748095757	FALSE	rs6696926	1	FALSE	FALSE
ENSG00000204569.5	PPP1R10	18.1216340471607	7.84078176196976	+	5.40268640746985e-06	TRUE	FALSE	FALSE	FALSE	NA	+	+	0.00527	0.126383599109711	0	0.568634226051165	0	0	0.494305123701471	FALSE	FALSE	0	0	0.396270582159369	FALSE	0.295137538205057	1	1	1	-1	-1	1	0.085912230677156	-0.0538100562083682	0.405073065823794	FALSE	rs116353073	1	FALSE	FALSE
ENSG00000203875.5	SNHG5	9.57644294959128	29.1935118997217	-	5.41683771380439e-06	FALSE	TRUE	FALSE	FALSE	NA	-	NA	NA	0.821707184175396	0.481616000140959	0.891108308275877	0.332116111111423	0	0.782853262097355	FALSE	FALSE	0	0	0.454556052176385	FALSE	0.69497082522923	1	1	1	1	0.00375267500223729	1	0.0655622893145519	-0.155728896806715	0.426249642730642	FALSE	rs1923596	1	FALSE	FALSE
ENSG00000116752.5	BCAS2	7.58669262770898	4.50338552717961	-	5.44825025105566e-06	FALSE	TRUE	FALSE	FALSE	NA	-	NA	NA	0.397513194335102	0	0.651894650185193	0	0	0.335789479266474	FALSE	FALSE	0	0	0.506643977588803	FALSE	0.196554598499583	1	-1	1	-1	-1	1	0.0888295582807015	-0.0399443773014102	0.421338850317896	FALSE	rs1750391	1	FALSE	FALSE
ENSG00000213609.3	NA	6.89544348236776	9.74613101221168	-	5.50537890132093e-06	FALSE	TRUE	FALSE	FALSE	NA	-	NA	NA	0.321148656950557	0	0.633360348620332	0	0	0.000904816637899562	FALSE	FALSE	0.356050293428684	0	0.560589627248502	FALSE	0.193275909974993	-1	-1	1	-1	-1	0.878816100978578	0.137667595895183	0.0431580779108807	0.36029055249313	FALSE	rs10996078	1	FALSE	FALSE
ENSG00000118579.6	MED28	17.3016764433753	19.1051455703162	-	5.65161362958845e-06	FALSE	TRUE	FALSE	FALSE	NA	-	-	0.00449	0.281469655413394	0	0.484898422088913	0	0	0.591307326116701	FALSE	FALSE	0	0	0.048583198208629	FALSE	0.362823006390664	1	1	1	1	-1	1	0.208620307266302	0.127787961086291	0.460685161657808	FALSE	rs34773031	1	FALSE	FALSE
ENSG00000184924.4	PTRHD1	3.35856773028296	1.38804515331957	-	5.70554064511332e-06	FALSE	TRUE	FALSE	FALSE	NA	-	+	0.104	0.271030447052226	0	0.713519002860154	0	0	0	FALSE	FALSE	0.403354313835264	0	0.610295580123601	FALSE	0.177104751319811	-1	-1	1	1	0.39489235347364	1	-0.010938304732836	-0.144565602679595	0.305295207272998	FALSE	rs1042571	1	TRUE	FALSE
ENSG00000240397.1	NA	33.6365979567308	50.0288086649062	+	5.71011803974269e-06	TRUE	FALSE	FALSE	FALSE	NA	+	NA	NA	0.519804418677672	0.162954808516076	0.738047008551019	0	0	0.27617321454513	FALSE	TRUE	0	0	0.390666657180265	FALSE	0.379105307029731	1	1	1	1	-0.000641061582253022	1	0.0489576381691745	-0.0610838501658527	0.375766189194944	FALSE	rs11576827	1	FALSE	FALSE
ENSG00000008324.6	SS18L2	5.68288820354665	4.82967487510491	-	5.74830370897325e-06	FALSE	TRUE	FALSE	FALSE	NA	-	-	0.259	0.426206570570487	0	0.721810740876756	0.3721346308513	0	0.725384096464718	FALSE	FALSE	0	0	0.503374925211298	FALSE	0.152486801889414	0.443521280021248	0.228951940572478	1	-0.00277305865601178	-1	1	-0.29761500307279	-0.502397439366184	0.119670377051063	FALSE	rs339696	1	FALSE	FALSE
ENSG00000176393.6	RNPEP	33.8470372297515	81.2069348325949	+	5.8275141064995e-06	TRUE	FALSE	FALSE	FALSE	NA	+	+	0.000546	0.157752438084253	0	0.70345796478477	0.578735675824266	0	0.868268589233383	FALSE	FALSE	0.00654619268462399	0	0.468415921163958	FALSE	0.78010558488469	1	1	1	1	0.00692734007208887	1	-0.0293860284576775	-0.204934921912396	0.328658746480353	FALSE	rs7540834	1	FALSE	FALSE
ENSG00000166963.8	MAP1A	0.357522583145434	0.0167842517546952	+	5.8447745475316e-06	TRUE	FALSE	FALSE	FALSE	NA	-	+	0.0273	0.0458021702781978	0	0.693795344107617	0.490217673025154	0	0.701446108289967	FALSE	FALSE	0	0	0.17905104187107	FALSE	0.414281744929147	1	1	1	-1	-1	1	-0.242289907236175	-0.338221954909719	0.0703283380009929	FALSE	rs2412741	1	FALSE	FALSE
ENSG00000174547.9	MRPL11	4.55562939375987	1.86771011313068	-	5.87483971791363e-06	FALSE	TRUE	FALSE	FALSE	NA	-	+	0.587	0.569777209009432	0.120023282198944	0.74091399043569	0	0	0.132318157694647	FALSE	TRUE	0	0	0.418122824771889	FALSE	0.251236454570714	-0.0986498796192992	-1	1	-1	-1	1	0.287262216380643	0.174573354188443	0.534327395783797	FALSE	rs11227311	1	FALSE	FALSE
ENSG00000149136.3	SSRP1	11.7874040518061	5.83636631684306	+	5.99056047442494e-06	TRUE	FALSE	FALSE	FALSE	NA	+	-	0.00172	0	0	0.500520409287552	0	0	0.476770980362591	FALSE	FALSE	0	0	0.0834819207612277	FALSE	0.640344540150042	0.00814968775809902	-0.874574221960504	1	0.163387842777736	-1	1	0.560975635888835	0.517076521869517	0.676249155541912	FALSE	rs2848641	1	FALSE	FALSE
ENSG00000198624.8	CCDC69	50.2210823966279	39.5109694445909	-	6.04594802467025e-06	FALSE	TRUE	FALSE	FALSE	NA	+	+	1.35e-05	0	0	0.46594628755305	0	0	0.397450885198063	FALSE	FALSE	0	0	0	FALSE	0.465351486524035	1	1	1	0.381012670933526	-0.864955777957573	1	0.0247410941324819	-0.125454307379348	0.374930093142608	FALSE	rs2053054	1	FALSE	FALSE
ENSG00000145425.5	RPS3A	7.32432908818493	38.0295618312833	-	6.05325001791921e-06	FALSE	TRUE	FALSE	FALSE	NA	-	NA	NA	0.517103525771869	0	0.742551723647466	0.00257506266787564	0	0.487959910873288	FALSE	FALSE	0	0	0.53691219361167	FALSE	0.245179216449014	-1	-0.991705762959488	1	0.777304196255529	-1	0.000713139331180461	0.141973943480339	-0.00682832922170992	0.414968694216331	FALSE	rs1561915	1	FALSE	FALSE
ENSG00000145649.7	GZMA	25.2125352924634	281.731950919217	-	6.06567620226498e-06	FALSE	TRUE	FALSE	FALSE	NA	+	+	3.14e-30	0.567334230912883	0	0.773427391312731	0.581959413204893	0	0.732204911505218	FALSE	FALSE	0	0	0.233456736925805	FALSE	0.641844956932481	1	1	1	-1	-1	1	0.086022319163113	-0.0342700668367598	0.57140605448667	FALSE	rs35939	1	TRUE	FALSE
ENSG00000235084.2	CHCHD2P6	5.11632646420824	3.18040550019179	-	6.07723803502421e-06	FALSE	TRUE	FALSE	FALSE	NA	-	NA	NA	0.328289482805728	0	0.649290472230057	0	0	0.399118924384902	FALSE	FALSE	0.267842276666623	0	0.53627271328897	FALSE	0.064406779661017	-1	-1	1	1	-0.616783840052896	1	0.00309826269536975	-0.195649370183338	0.357202471345626	FALSE	rs7512460	1	FALSE	FALSE
ENSG00000197157.6	SND1	16.2869978344934	9.58660916532335	+	6.1060362528706e-06	TRUE	FALSE	FALSE	FALSE	NA	+	-	0.871	0	0	0.314919913132902	0	0	0.491702160637134	FALSE	FALSE	0	0	0.317028661986989	FALSE	0.407335370936371	-0.00104057838461043	-0.710663351941173	1	0.345772161438071	0.00083475130859563	1	0.33484788869598	0.285690072232017	0.545755659453585	FALSE	rs3750035	1	FALSE	FALSE
ENSG00000105321.8	CCDC9	12.5691123636899	7.38669536694802	+	6.12887058532716e-06	TRUE	FALSE	FALSE	FALSE	NA	+	+	0.139	0.450248492421623	0.0122244918616727	0.686622549804485	0.342659493286536	0	0.622238743147442	FALSE	FALSE	0.157489426654775	0	0.548041984016148	FALSE	0.498694081689358	0.97790386943462	0.849176526021469	1	-1	-0.0112738390620991	1	0.230137179962268	0.106885404939095	0.574183744105833	FALSE	rs11671666	1	FALSE	FALSE
ENSG00000004939.9	SLC4A1	8.33978130016051	95.2475282985133	+	6.15735500808048e-06	TRUE	FALSE	FALSE	FALSE	NA	+	+	0.702	0.377899858386768	0	0.642832361923874	0.433916913115879	0	0.773761144495806	FALSE	FALSE	0	0	0.435594447537709	FALSE	0.695081967213115	1	1	1	0.202676074842256	-1	1	0.717535945456593	0.562482594178256	0.842991251580352	FALSE	rs2074439	1	FALSE	FALSE
ENSG00000256100.1	NA	20.6497205485611	36.4906441192534	-	6.16064572321594e-06	FALSE	TRUE	FALSE	FALSE	NA	+	NA	NA	0.306505772751895	0	0.536508976208108	0	0	0.640496489216599	FALSE	FALSE	0	0	0.505116785496644	FALSE	0.185996110030564	1	0.0871744251738558	1	0.00931616571420943	-1	1	0.0656480878313056	-0.0946539316936788	0.421243540768046	FALSE	rs528941	1	FALSE	FALSE
ENSG00000163563.7	MNDA	704.185920382554	44800.3476065473	-	6.17793395361185e-06	FALSE	TRUE	FALSE	FALSE	NA	-	+	0.761	0.202604352346553	0	0.734568844740849	0.170504889264172	0	0.653015336996218	FALSE	FALSE	0.359957337588319	0	0.618235387730255	FALSE	0.613003612114476	0.917285922724174	0.843970633281441	1	0.972244268990445	0.00379049233099774	1	0.597916356184866	0.549133242368963	0.764337446308008	FALSE	rs2794503	1	FALSE	FALSE
ENSG00000132646.6	PCNA	17.421287568306	14.7798514009925	-	6.20320083295883e-06	FALSE	TRUE	FALSE	FALSE	NA	-	+	0.373	0.617803710037489	0.0672434248962532	0.757113224798471	0.119117619167222	0	0.598152633861913	FALSE	FALSE	0.179853372118896	0	0.747916134784849	FALSE	0.208002222839678	-0.101270752434013	-1	1	-1	-1	1	0.365295646981267	0.258144881410275	0.643533480172683	FALSE	rs6076678	1	FALSE	FALSE
ENSG00000162639.11	HENMT1	4.27499622309603	1.16265068783394	-	6.22217370040535e-06	FALSE	TRUE	FALSE	FALSE	NA	-	+	0.000103	0.161636147314216	0	0.638573050338687	0.390106003909127	0	0.624359810184203	FALSE	FALSE	0.264242695265688	0	0.472772989717663	FALSE	0.370880800222284	0.357281689762186	-0.663685446823827	1	0.000978375869338491	-0.000348166704674816	1	0.211270562373007	0.0734510153654785	0.515150017885289	FALSE	rs1765295	1	FALSE	FALSE
ENSG00000178429.8	RPS3AP5	1.43105245535714	4.6712213241179	-	6.25863110599807e-06	FALSE	TRUE	FALSE	FALSE	NA	-	NA	NA	0.444234439106619	0	0.711160676137489	0.145457761824205	0	0.572564223432456	FALSE	FALSE	0.362172745900594	0	0.708933851700384	FALSE	0.0106696304529036	-0.938288155662706	-1	-0.0373228210341056	0.00108477277012332	-0.00301445045665851	1	0.145646016065825	-0.0486794549750587	0.474494016970013	TRUE	rs3814208	1	FALSE	FALSE
ENSG00000128272.10	ATF4	50.0636689888535	64.7916633791481	-	6.26606908323087e-06	FALSE	TRUE	FALSE	FALSE	NA	-	+	0.00674	0.426491420552487	0	0.681143076732964	0	0	0.35821968388361	FALSE	FALSE	0.251016239274931	0	0.629743292640062	FALSE	0.236176715754376	-1	-1	1	-1	-1	1	0.455495409103342	0.351329300014715	0.625536588094157	FALSE	rs7287617	0.51806085324861	TRUE	FALSE
ENSG00000108107.7	RPL28	138.919175806685	1952.83469972665	-	6.33333279152248e-06	FALSE	TRUE	FALSE	FALSE	NA	-	-	6.48e-07	0.652646943222672	0	0.810782378413125	0	0	0.561142502459716	FALSE	FALSE	0	0	0.558402726413728	FALSE	0.283467629897194	1	1	1	-1	-1	0.716872119530768	0.407345269275686	0.258047871196751	0.690689026580335	FALSE	rs73932286	1	FALSE	FALSE
ENSG00000137168.7	PPIL1	3.45439854570637	1.06286189061742	-	6.39663141168486e-06	FALSE	TRUE	FALSE	FALSE	NA	-	-	4.35e-08	0	0	0.511326800863512	0	0	0.551360729332947	FALSE	FALSE	0	0	0.672663691142407	FALSE	0.235843289802723	1	-0.203820799362563	1	-0.259116650194101	-1	1	0.393940409920228	0.291235859281841	0.636379934362133	FALSE	rs1547571	1	FALSE	FALSE
ENSG00000125651.9	GTF2F1	21.7209292294136	10.8112525954613	+	6.43726867472722e-06	TRUE	FALSE	FALSE	FALSE	NA	+	+	0.647	0	0	0.639606755776937	0	0	0.551782119550475	FALSE	FALSE	0	0	0	FALSE	0.500194498471798	0.809788764483607	0.224602841250753	1	0.334489747129194	-0.0461422425432202	1	0.478371300115745	0.410518768149924	0.621890226089916	FALSE	rs10406814	1	FALSE	FALSE
ENSG00000245532.3	NEAT1	26.6481915191514	66.1281947493548	+	6.49999282244179e-06	TRUE	FALSE	FALSE	FALSE	NA	+	NA	NA	0.711115637974353	0.181005750253589	0.817797561016831	0.641785851510623	0.0135513886630716	0.75093727370243	FALSE	FALSE	0.322990540069293	0	0.647805557575028	FALSE	0.295137538205057	0.539461765623479	0.334613970484004	1	1	0.00480475608781558	1	-0.138196064616115	-0.339472129025645	0.497145837851782	FALSE	rs17146724	1	FALSE	FALSE
ENSG00000160255.12	ITGB2	226.975310858176	1982.22231689673	+	6.60642952543323e-06	TRUE	FALSE	FALSE	FALSE	NA	+	+	3.25e-08	0.214343691094502	0	0.685940964304325	0.209227423094146	0	0.700595261269622	FALSE	FALSE	0	0	0.369557726428421	FALSE	0.328035565434843	1	1	1	-1	-1	1	-0.100688346357155	-0.29450228853134	0.276065431102564	FALSE	rs233315	1	FALSE	FALSE
ENSG00000113360.12	DROSHA	2.91410430666839	0.548450552199418	+	6.67177182767729e-06	TRUE	FALSE	FALSE	FALSE	NA	+	-	1.53e-07	0	0	0.527002500409003	0.142904121313306	0	0.541317008999792	FALSE	FALSE	0.158724839404818	0	0.310086343016139	FALSE	0.555821061405946	0.988859828944255	0.879968931156829	1	0.966131840331148	0.00277240780795373	1	0.405013956247304	0.3325019982405	0.642837227535341	FALSE	rs4867400	1	FALSE	FALSE
ENSG00000266753.1	NA	9.13741149020808	3.46489888008862	+	6.72909380842748e-06	TRUE	FALSE	FALSE	FALSE	NA	+	NA	NA	0.234183885238452	0	0.503072495402287	0	0	0.374327286836452	FALSE	FALSE	0	0	0.425800731099797	FALSE	0.351986662961934	1	-0.254435620318086	1	0.00207350475379668	0.00147361990848115	1	0.141137106650107	0.04275960981251	0.635868320593679	FALSE	rs7207364	1	FALSE	FALSE
ENSG00000167468.11	GPX4	49.3209280340405	155.006386393386	-	6.86027645838626e-06	FALSE	TRUE	FALSE	FALSE	NA	-	-	0.327	0.508480189040011	0	0.698721547391064	0	0	0.382234279252686	FALSE	FALSE	0.412378243498312	0	0.760725838865717	FALSE	0.240344540150042	1	-0.3030789613219	1	-1	-1	1	0.35537953783686	0.188059280256314	0.688125635082209	FALSE	rs10418290	1	FALSE	FALSE
ENSG00000143443.9	C1orf56	45.1162905565105	82.6165818321113	+	6.87012423703108e-06	TRUE	FALSE	FALSE	FALSE	NA	+	+	0.148	0.0339379189059682	0	0.696933614727576	0	0	0.475293780728184	FALSE	FALSE	0	0	0.127829339981877	FALSE	0.197888302306196	1	1	1	-0.187865186008375	-1	1	-0.141525253134779	-0.309791410236086	0.12220006468573	FALSE	rs35342887	1	FALSE	FALSE
ENSG00000241468.3	ATP5J2	11.951819675723	14.2065957944465	-	6.91938261640311e-06	FALSE	TRUE	FALSE	FALSE	NA	+	NA	NA	0.503144755548079	0	0.750315714291103	0	0	0.464822934032591	FALSE	FALSE	0	0	0.292504296702746	FALSE	0.174604056682412	1	0.165173142792504	1	-1	-1	1	0.150588330173714	0.0161415727663797	0.426885296120287	FALSE	rs4729457	1	FALSE	FALSE
ENSG00000075413.13	MARK3	9.59609134615384	1.22291281243468	+	6.98245850122753e-06	TRUE	FALSE	FALSE	FALSE	NA	-	-	0.973	0.530770015533481	0	0.823892021426116	0.772067559359539	0.382522768805062	0.852906574428317	FALSE	FALSE	0	0	0.463901316063439	FALSE	0.340983606557377	1	1	1	-1	-0.798277088537763	1	-0.620939624578043	-0.709601641761847	-0.36870913585696	FALSE	rs8009257	1	FALSE	TRUE
ENSG00000169372.7	CRADD	1.31758826247689	0.0974233878853346	-	7.05856475887986e-06	FALSE	TRUE	FALSE	FALSE	NA	-	+	1.97e-05	0.187023829930689	0	0.519018626191656	0	0	0.43169633274722	FALSE	FALSE	0.14954660076683	0	0.434706670835651	FALSE	0.0531814392886913	-1	NA	NA	-0.00228449172057164	NA	NA	0.0385460423684114	NA	NA	FALSE	rs12099801	0.682696690835319	TRUE	FALSE
ENSG00000161010.10	C5orf45	23.7761752886081	12.0556135388946	+	7.12676092498147e-06	TRUE	FALSE	FALSE	FALSE	NA	+	-	0.109	0.425779957666368	0	0.718565854232687	0.0363470129733795	0	0.729243761395773	FALSE	FALSE	0	0	0.506782056122394	FALSE	0.591831064184496	1	0.721605296457086	1	-0.0900236893372218	-1	1	0.474307982420439	0.378997044593109	0.653226949327506	FALSE	rs255026	1	FALSE	FALSE
ENSG00000130255.8	RPL36	87.254541005291	1251.6339429217	-	7.13867954652167e-06	FALSE	TRUE	FALSE	FALSE	NA	-	-	3.55e-11	0.649595469318656	0	0.742657557474611	0	0	0.42911545087017	FALSE	FALSE	0.402688544939202	0	0.764942220763136	FALSE	0.194109474854126	1	-0.707593229191602	1	-1	-1	1	0.34834861502711	0.178475113265081	0.62652586608225	FALSE	rs8111933	1	FALSE	FALSE
ENSG00000258959.1	NA	3.84489990281827	1.26930395670008	+	7.2489095391738e-06	TRUE	FALSE	FALSE	FALSE	NA	+	NA	NA	0	0	0.511039337354381	0.047212461439225	0	0.352823183464635	FALSE	FALSE	0	0	0.283728824274842	FALSE	0.314587385384829	1	0.379656173597653	1	0.712362016226345	0.00379477727249229	1	0.212317884493728	0.119537970150853	0.477539150764074	FALSE	rs7494291	1	FALSE	FALSE
ENSG00000169230.5	PRELID1	64.7329548796791	197.08736582894	-	7.28370975912475e-06	FALSE	TRUE	FALSE	FALSE	NA	-	NA	NA	0.415206067203274	0	0.613297671242884	0.278586765664453	0	0.742642245867678	FALSE	FALSE	0	0	0.552462585211457	FALSE	0.43651014170603	1	1	1	-1	-1	1	0.14390793336231	0.0193436062117504	0.439402739716801	FALSE	rs879653	1	FALSE	FALSE
ENSG00000169567.7	HINT1	12.2888013982393	41.069707260511	-	7.31933957008025e-06	FALSE	TRUE	FALSE	FALSE	NA	-	-	0.00682	0.425781936159667	0	0.706554340957644	0.19123866612337	0	0.527325453669633	FALSE	FALSE	0	0	0.548172989292142	FALSE	0.35137538205057	1	0.722924693956868	1	-1	-1	1	0.0266825724160463	-0.135873836110759	0.320842803681883	FALSE	rs72801777	1	FALSE	FALSE
ENSG00000120675.4	DNAJC15	1.9816026277104	0.652805821018414	-	7.48789921699949e-06	FALSE	TRUE	FALSE	FALSE	NA	+	+	0.517	0.512424886020217	0	0.665366364581392	0.121684623769055	0	0.476069285561863	FALSE	FALSE	0.247138697277973	0	0.60871804720931	FALSE	0.418282856348986	0.353663195880316	-0.243681620126636	1	0.00283750327791167	0.00238991240367038	1	0.304822180266171	0.156501719214348	0.632939561826577	FALSE	rs9533433	1	FALSE	FALSE
ENSG00000205246.4	NA	38.2755276140684	204.253774507387	-	7.60486456530981e-06	FALSE	TRUE	FALSE	FALSE	NA	-	NA	NA	0.703895039138306	0.174111185725237	0.800853379591872	0	0	0.590187761219667	FALSE	FALSE	0.392013733596366	0	0.694582241629585	FALSE	0.350541817171437	1	-1	1	1	0.00365132779032673	1	0.174248030032935	0.00709070606641274	0.547530205392267	FALSE	rs1645768	1	FALSE	FALSE
ENSG00000076944.9	STXBP2	70.9215301103883	223.05589052456	+	7.63418480389286e-06	TRUE	FALSE	FALSE	FALSE	NA	+	+	1.86e-06	0.453893092815905	0	0.75407720164087	0	0	0.432418449171048	FALSE	FALSE	0	0	0.335991788484348	FALSE	0.421172547929981	1	1	1	1	-0.020067768461072	1	-0.139032698160239	-0.238898321861876	0.129672019660882	FALSE	rs4804833	1	FALSE	FALSE
ENSG00000162244.5	RPL29	130.641397461457	1698.19722650425	-	7.73898792702379e-06	FALSE	TRUE	FALSE	FALSE	NA	-	NA	NA	0.613741019258455	0.159185424365336	0.738692597845569	0	0	0.552524993156349	FALSE	FALSE	0.235091965438089	0	0.694622337779796	FALSE	0.260350097249236	1	-0.999966398065964	1	-1	-1	1	0.283272008328719	0.0962771033066226	0.594757532590355	FALSE	rs6763882	1	FALSE	FALSE
ENSG00000227081.4	NA	137.024157320872	18980.886869483	-	7.75017895838751e-06	FALSE	TRUE	FALSE	FALSE	NA	+	NA	NA	0.398960181480967	0	0.671598643163118	0	0	0.550874216468583	FALSE	FALSE	0	0	0.420075231333494	FALSE	0.376382328424562	1	0.971236797083611	1	0.170550188948321	-0.693347765463982	1	-0.0186480313614833	-0.194153327276676	0.313500818696136	FALSE	rs2283290	1	FALSE	FALSE
ENSG00000177576.6	C18orf32	9.62136897590361	15.6250984643083	-	7.80468955921434e-06	FALSE	TRUE	FALSE	FALSE	NA	-	+	0.0446	0.246252261479425	0	0.688103856539311	0	0	0.143139191814432	FALSE	FALSE	0	0	0.366179120195956	FALSE	0.165545984995832	1	0.773894548354932	1	0.584101077168862	0.151441775410308	1	-0.146666860218589	-0.280157085248775	0.119973183460214	FALSE	rs17801621	1	FALSE	FALSE
ENSG00000172345.8	STARD5	15.6701518745067	10.482864383603	+	8.05404133023594e-06	TRUE	FALSE	FALSE	FALSE	NA	-	-	8.03e-05	0.56983285351665	0	0.698828391703818	0.529526300355306	0.154056243874	0.851950008410434	FALSE	FALSE	0.180095077130548	0	0.812458947546478	FALSE	0.293081411503195	0.916715728227542	0.611551316590667	1	0.444809356368812	-0.0655094318399641	1	-0.0322387575827153	-0.143828180404628	0.52512108546048	FALSE	rs72749540	1	TRUE	FALSE
ENSG00000103549.16	RNF40	22.288859319754	11.3915152063253	+	8.1598907260504e-06	TRUE	FALSE	FALSE	FALSE	NA	+	+	0.000756	0	0	0.500913303052273	0.243401081851812	0	0.70436068530063	FALSE	FALSE	0	0	0.121002897632275	FALSE	0.290803000833565	1	1	1	-1	-1	1	-0.0730807420286323	-0.209007621280275	0.296126013697446	FALSE	rs76242002	1	FALSE	FALSE
ENSG00000161217.6	PCYT1A	15.7222159718734	6.33894395967839	+	8.17845078065918e-06	TRUE	FALSE	FALSE	FALSE	NA	+	NA	NA	0	0	0.47880214461862	0	0	0.662121749764664	FALSE	FALSE	0	0	0.366417405071581	FALSE	0.422339538760767	1	1	1	1	-0.50780841219817	1	0.0484597931851081	-0.226351339138035	0.411142111755807	FALSE	rs498226	1	FALSE	FALSE
ENSG00000127616.11	SMARCA4	7.3596061214653	2.75718316061379	+	8.20359545140986e-06	TRUE	FALSE	FALSE	FALSE	NA	+	-	0.00369	0	0	0.143093429965822	0.042087664266453	0	0.447608843088879	FALSE	FALSE	0	0	0.355215223141749	FALSE	0.449458182828564	1	0.871135660074712	1	0.89202705747213	0.349674167664011	1	0.286021577660988	0.195424101572462	0.601300153948316	FALSE	rs11669166	1	FALSE	FALSE
ENSG00000259332.2	ST20-MTHFS	21.6541955202312	40.6806831930402	-	8.20926367997233e-06	FALSE	TRUE	FALSE	FALSE	NA	-	NA	NA	0.244293875144409	0	0.599643217955437	0	0	0.42731869247075	FALSE	FALSE	0	0	0.52630163873379	FALSE	0.471686579605446	0.0814652920543344	-0.991872465463176	1	0.140444713678009	-0.995109117137998	1	0.469548416342382	0.38777398989296	0.688558239832391	FALSE	rs4779055	1	FALSE	FALSE
ENSG00000196199.8	MPHOSPH8	20.3024247843467	13.7416276339227	+	8.38202700444164e-06	TRUE	FALSE	FALSE	FALSE	NA	+	-	0.0357	0.262593536005037	0	0.58643308501838	0.314772129552421	0	0.543120371124684	FALSE	FALSE	0	0	0.580465835962052	FALSE	0.468685746040567	1	-0.0397807397777422	1	0.524035556748174	0.00214062112303786	1	0.46138038428754	0.386479118562167	0.639774037343011	FALSE	rs7999931	1	FALSE	FALSE
ENSG00000131495.4	NDUFA2	18.8919330808081	25.0990861783376	-	8.41875573703295e-06	FALSE	TRUE	FALSE	FALSE	NA	+	NA	NA	0.291494433921199	0	0.603643356364409	0.102820980805887	0	0.701678754288083	FALSE	FALSE	0	0	0.10525651676055	FALSE	0.281689358155043	1	1	1	-1	-1	0.117117306196495	0.0999011894499825	0.00188466790579504	0.442547678849799	FALSE	rs6881581	1	FALSE	FALSE
ENSG00000180581.6	SRP9P1	2.80185971786834	2.35733163362709	-	8.42797526181652e-06	FALSE	TRUE	FALSE	FALSE	NA	-	NA	NA	0	0	0.561653610667994	0.0605088027954243	0	0.464454375666983	FALSE	FALSE	0	0	0.384999534011116	FALSE	0.111530980828008	1	0.891965705462173	1	0.50785034193734	0.0736824781347439	1	-0.207359119405311	-0.355710446958032	0.0682005058577692	FALSE	rs2631681	1	FALSE	FALSE
ENSG00000112640.10	PPP2R5D	16.2068977341619	7.08568698049737	+	8.48517006131249e-06	TRUE	FALSE	FALSE	FALSE	NA	+	+	0.111	0	0	0	0	0	0.291438661595772	FALSE	FALSE	0	0	0	FALSE	0.412003334259517	NA	0.266139620952269	1	NA	0.246263737836063	1	NA	0.347662021422199	0.616925179809102	FALSE	rs2395939	1	FALSE	FALSE
ENSG00000090263.11	MRPS33	1.74936851907032	0.798289911383978	-	8.53737014883516e-06	FALSE	TRUE	FALSE	FALSE	NA	-	-	1.93e-12	0.338791331518319	0	0.690166480435033	0	0	0.434187685163875	FALSE	FALSE	0	0	0.0156226459692853	FALSE	0.166323978883023	1	1	1	-0.0101949388075424	-1	1	-0.127146138588628	-0.229677953158834	0.197266148701493	FALSE	rs17520514	1	FALSE	TRUE
ENSG00000119801.8	YPEL5	20.3978637994143	58.4261978717787	-	8.5792141901123e-06	FALSE	TRUE	FALSE	FALSE	NA	-	+	0.563	0	0	0.439955579314301	0	0	0.437636007724774	FALSE	FALSE	0	0	0.38038280674491	FALSE	0.254292859127536	0.197322940785178	-0.168276566263727	1	0.355879601429806	0.0721412334683541	1	0.17419383206931	0.0470116664025993	0.566253692621063	FALSE	rs4666205	1	FALSE	FALSE
ENSG00000090382.2	LYZ	1653.66213366477	534060.227115388	-	8.61132239025397e-06	FALSE	TRUE	FALSE	FALSE	NA	+	+	1.88e-08	0.640385983642115	0.0195256128630055	0.901007155272923	0.657257284539192	0.0402136824475373	0.848841281053917	FALSE	FALSE	0	0	0.531395857573821	FALSE	0.829730480689081	1	1	1	1	0.00369805921412605	1	0.560873466778886	0.332436092398054	0.753285681744995	FALSE	rs17106576	1	FALSE	FALSE
ENSG00000081154.7	PCNP	8.39942809270026	19.1844150724221	-	8.62918526061504e-06	FALSE	TRUE	FALSE	FALSE	NA	-	-	0.00149	0.142809768453109	0	0.719120669341621	0	0	0.323061837614008	FALSE	FALSE	0	0	0.28503567456357	FALSE	0.236343428730203	1	1	1	0.187973390933507	-1	1	-0.0969933877290144	-0.248185502205645	0.2945205556002	FALSE	rs348886	1	FALSE	FALSE
ENSG00000106615.5	RHEB	1.77045354609929	0.230135356232243	-	8.63047083957651e-06	FALSE	TRUE	FALSE	FALSE	NA	-	+	0.489	0.349582223160292	0	0.632573718043088	0.0483942451298182	0	0.226450621730462	FALSE	FALSE	0.164828225016015	0	0.462389237091153	FALSE	0.196165601555988	0.590589027920107	0.188807186522524	1	-3.19019296539359e-05	-0.00122247031182274	0.859304458897529	0.108782681812586	-0.00203531647492392	0.509715808096011	FALSE	rs7780461	1	FALSE	FALSE
ENSG00000125844.10	RRBP1	8.01816592836589	4.22934864003705	+	8.65446489870433e-06	TRUE	FALSE	FALSE	FALSE	NA	+	+	0.00417	0	0	0.331545083503359	0.0178477645368972	0	0.757702024100466	FALSE	FALSE	0	0	0.29402783665409	FALSE	0.457293692692415	1	0.987287747043228	1	-0.0295079066799604	-1	1	0.222849017777758	0.128240707864066	0.456549929369361	FALSE	rs6132007	1	FALSE	FALSE
ENSG00000235082.2	SUMO1P3	4.45731435643564	3.19294797282927	-	8.888115346307e-06	FALSE	TRUE	FALSE	FALSE	NA	-	NA	NA	0.101633195944387	0	0.396751231653146	0.0647724781990094	0	0.428288872569409	FALSE	FALSE	0.162271784677604	0	0.530602499800985	FALSE	0.00766879688802445	-0.145859004696729	-1	1	0.00210875702408396	0.000274615333436007	1	0.00404472649291811	-0.161238167735909	0.350829631444782	FALSE	rs74558526	1	FALSE	FALSE
ENSG00000104979.4	C19orf53	32.5702761752137	88.9706748718213	-	8.89043503705006e-06	FALSE	TRUE	FALSE	FALSE	NA	+	-	0.0808	0.500375746119026	0	0.700127328652209	0	0	0.73723822427397	FALSE	FALSE	0.356880976772413	0	0.800998747527883	FALSE	0.281411503195332	-0.332338082633111	-1	1	-1	-1	1	0.560130635716329	0.476678121713518	0.764049220341095	FALSE	rs77569445	1	FALSE	FALSE
ENSG00000155099.3	TMEM55A	9.86939294473512	10.6975627960104	-	9.00545150900787e-06	FALSE	TRUE	FALSE	FALSE	NA	-	-	0.896	0	0	0.568187644619467	0	0	0.407242098369294	FALSE	FALSE	0	0	0.148838023617009	FALSE	0.427174215059739	0.615504992317189	0.400001340827032	1	0.510745678484796	0.148667027670653	1	0.434859955369819	0.387175426819944	0.649778223100484	FALSE	rs7007188	1	FALSE	FALSE
ENSG00000131558.9	EXOC4	3.67291255072619	0.615335202570814	+	9.07971507695424e-06	TRUE	FALSE	FALSE	FALSE	NA	+	+	0.0127	0.0729010379042943	0	0.672053481877641	0	0	0.409044282127969	FALSE	FALSE	0.152064739548272	0	0.650136962217122	FALSE	0.402278410669631	-1	-1	1	0.57052370402868	0.371203454794334	1	0.160542052657651	0.0794365351984418	0.520042985605891	FALSE	rs4731935	1	FALSE	FALSE
ENSG00000249264.1	EEF1A1P9	9.68029133502171	18.7775329851998	-	9.15961510074435e-06	FALSE	TRUE	FALSE	FALSE	NA	-	NA	NA	0.367819484447771	0	0.694994159198002	0	0	0.125893315630722	FALSE	FALSE	0.320801033137133	0	0.725780377271577	FALSE	0.207724367879967	0.19050330169661	-1	1	1	1	1	0.0589282693911024	-0.0339077200956063	0.420956078022822	FALSE	rs2651335	1	FALSE	FALSE
ENSG00000115364.9	MRPL19	1.62095394163763	0.222919233902879	-	9.17034180832499e-06	FALSE	TRUE	FALSE	FALSE	NA	-	-	0.188	0	0	0.213787405701457	0.479010769492758	0	0.593806022849463	FALSE	FALSE	0	0	0.500223430351374	FALSE	0.20755765490414	1	0.965338804644622	1	-0.417707130667296	-0.808768473747846	1	-0.046852393442192	-0.130205187407048	0.374247888424353	FALSE	rs11675641	1	FALSE	FALSE
ENSG00000164587.7	RPS14	59.742886839207	564.184194665603	-	9.23767005116073e-06	FALSE	TRUE	FALSE	FALSE	NA	-	-	3.95e-13	0.676523616322653	0.271384250610115	0.775766520535042	0	0	0.638396677482672	FALSE	FALSE	0	0	0.529353329789248	FALSE	0.179938871908864	1	0.0358255303349438	1	-1	-1	0.609845478561475	-0.0654579346757367	-0.274257300316115	0.34624127049941	FALSE	rs2161358	1	FALSE	FALSE
ENSG00000140553.11	UNC45A	8.53015376733922	2.30527899189813	+	9.49772249329607e-06	TRUE	FALSE	FALSE	FALSE	NA	+	+	4.3e-05	0	0	0.527601882485946	0.132202120410798	0	0.465423964087327	FALSE	FALSE	0	0	0.524712684614238	FALSE	0.636676854681856	0.873491211056511	0.645075247094785	1	1	0.00494166873124004	1	0.434492557414503	0.372722809600657	0.671541417224557	FALSE	rs10152205	1	FALSE	FALSE
ENSG00000164751.10	PEX2	2.32396654823859	1.05332394087591	-	9.53536538808863e-06	FALSE	TRUE	FALSE	FALSE	NA	-	+	0.737	0	0	0.563265068195159	0	0	0.506367307473055	FALSE	FALSE	0	0	0.654023601949758	FALSE	0.12998055015282	1	0.948760687364155	1	-0.243838492834147	-1	1	-0.0902615094368461	-0.230282340484644	0.318922723787395	FALSE	rs67091342	1	FALSE	TRUE
ENSG00000267607.1	NA	7.00492409881914	3.45297408525898	+	9.63509920429845e-06	TRUE	FALSE	FALSE	FALSE	NA	+	NA	NA	0	0	0.443572453563176	0.297953377115648	0	0.667265862111892	FALSE	FALSE	0	0	0.44111473890507	FALSE	0.581494859683245	1	1	1	1	0.777557132913519	1	0.222888089913162	0.0505171023636545	0.59499457307241	FALSE	rs12609337	1	FALSE	FALSE
ENSG00000197006.9	METTL9	11.6663061939661	6.98057890442008	-	9.63887615042143e-06	FALSE	TRUE	FALSE	FALSE	NA	-	+	0.0146	0	0	0.391253712382713	0	0	0.690393719375554	FALSE	FALSE	0	0	0.622610163628273	FALSE	0.521756043345374	1	0.999472138360575	1	0.367436054381357	-1	1	0.378161095673787	0.252215757016648	0.79571488159172	FALSE	rs4783514	1	FALSE	FALSE
ENSG00000134516.11	DOCK2	22.3305882710244	19.2281831100838	+	9.73477737760707e-06	TRUE	FALSE	FALSE	FALSE	NA	+	+	0.0108	0.0598318138340006	0	0.582169710626971	0	0	0.631014728523627	FALSE	FALSE	0	0	0.278654177813728	FALSE	0.275854404001111	1	0.439023026041655	1	0.267992624799612	-0.0664232098042402	1	-0.0112359218568487	-0.119233005169529	0.175912568759099	FALSE	rs34724799	1	TRUE	FALSE
ENSG00000113575.5	PPP2CA	16.3698613740931	7.50147093333258	-	9.76055825292422e-06	FALSE	TRUE	FALSE	FALSE	NA	-	-	0.0102	0.244550436781327	0	0.66682326041275	0	0	0.451346343954101	FALSE	FALSE	0	0	0	FALSE	0.211725479299806	1	1	1	-0.318286860336357	-1	1	-0.135120101714325	-0.241714301062169	0.126922037077389	FALSE	rs10477750	1	FALSE	FALSE
ENSG00000169385.2	RNASE2	15.984869687915	273.784843807024	-	9.78524703732241e-06	FALSE	TRUE	FALSE	FALSE	NA	-	+	7.62e-24	0.0302352137633326	0	0.78109352722952	0.440623733008014	0	0.812652971270501	FALSE	FALSE	0	0	0.626811941828978	FALSE	0.605223673242568	1	0.797795252405578	1	0.541453495454321	-0.657053477665904	1	0.492774056123218	0.357834114655693	0.776607939451597	FALSE	rs7156758	0.737729040890899	TRUE	FALSE
ENSG00000103313.7	MEFV	71.8222680726025	256.502716446337	+	9.86719236176514e-06	TRUE	FALSE	FALSE	FALSE	NA	+	+	0.000257	0.668982583117096	0.371586643670621	0.783958870135358	0	0	0.537457457400492	FALSE	TRUE	0.208975389581574	0	0.39605355838898	FALSE	0.643456515698805	1	1	1	1	0.0124202400361304	1	0.306955228949215	0.154888986829915	0.619692571667051	FALSE	rs11863444	1	FALSE	FALSE
ENSG00000154582.11	TCEB1	2.99470307167236	0.644404767346341	-	1.00380912951807e-05	FALSE	TRUE	FALSE	FALSE	NA	-	NA	NA	0.260284468330941	0	0.569446609314863	0	0	0.431735118913142	FALSE	FALSE	0.0825621743038655	0	0.564984019314493	FALSE	-0.076021116976938	-0.567598697791039	-1	1	-0.00224274471797903	-1	0.000613752663427543	-0.100902954837216	-0.284999326315964	0.191120899933518	FALSE	rs2036273	1	FALSE	FALSE
ENSG00000129128.8	SPCS3	14.1960190969679	17.3400445209487	-	1.00981673152848e-05	FALSE	TRUE	FALSE	FALSE	NA	-	-	0.491	0.0363724179678909	0	0.811533983760207	0.410681001981256	0	0.755099541624022	FALSE	FALSE	0	0	0.616061797177108	FALSE	0.370547374270631	1	0.972487638958612	1	-0.176296532165776	-1	1	0.0609966561518923	-0.034279002497524	0.531391450118302	FALSE	rs11721412	1	FALSE	FALSE
ENSG00000213261.3	EEF1B2P6	2.58966387648809	3.02326760303483	-	1.0121801269341e-05	FALSE	TRUE	FALSE	FALSE	NA	-	NA	NA	0.477216707459875	0	0.823004624068811	0	0	0.252219126033397	FALSE	FALSE	0.462278513177126	0	0.611258722788557	FALSE	-0.0533481522645179	-1	-1	1	-1	-1	1	-0.0571922424804696	-0.203034891324031	0.288953404265004	FALSE	rs1596974	1	FALSE	FALSE
ENSG00000175701.6	LINC00116	4.54071910994764	2.93946169354809	-	1.0219051863579e-05	FALSE	TRUE	FALSE	FALSE	NA	+	NA	NA	0.43397690429617	0	0.646619098895185	0	0	0.425762758012197	FALSE	FALSE	0.363254696383981	0	0.736144472855048	FALSE	0.29119199777716	0.455903876113557	-1	1	1	0.0435896560223816	1	0.156524960452068	0.0150304021212858	0.443903380211989	FALSE	rs4443010	1	FALSE	FALSE
ENSG00000132205.6	EMILIN2	11.9352167981326	10.0779157229943	+	1.022767174976e-05	TRUE	FALSE	FALSE	FALSE	NA	+	+	0.00244	0	0	0.519306048092756	0.506578182233038	0	0.764787124629049	FALSE	FALSE	0	0	0.28144394477381	FALSE	0.439455404278966	1	1	1	0.594817942733882	-0.00101754320488654	1	-0.243702937148315	-0.310519630053984	0.123997717604919	FALSE	rs4296341	1	FALSE	FALSE
ENSG00000136371.5	MTHFS	14.6679954643296	19.8312429177456	-	1.02312206139248e-05	FALSE	TRUE	FALSE	FALSE	NA	-	+	0.708	0.265166093681211	0	0.664838351256425	0	0	0.615311167677956	FALSE	FALSE	0	0	0.319848757718129	FALSE	0.388774659627674	0.99633215247661	NA	NA	-0.0160230657054568	NA	NA	0.411988894449047	NA	NA	FALSE	rs4778774	1	FALSE	FALSE
ENSG00000186395.6	KRT10	6.38156793478261	3.35300865816911	-	1.02466955639384e-05	FALSE	TRUE	FALSE	FALSE	NA	-	-	4.15e-08	0.315231307923377	0	0.550985628214068	0	0	0.388680261457625	FALSE	FALSE	0	0	0.524401913713832	FALSE	0.28463462072798	1	0.744139162292218	1	-1	-1	1	0.157416951488841	-0.0348564583722225	0.472191162226297	FALSE	rs12950335	1	FALSE	FALSE
ENSG00000213862.4	NA	44.3546822060683	230.727881604503	-	1.03527510582822e-05	FALSE	TRUE	FALSE	FALSE	NA	-	NA	NA	0.722870746510385	0.213531856341904	0.79882205981952	0	0	0.497977403254034	FALSE	TRUE	0.587093216707307	0	0.786464890459116	FALSE	0.156599055293137	-0.0887779676169695	-1	1	-1	-1	1	0.26036340302122	0.104308502223275	0.596885474718872	FALSE	rs76967345	1	FALSE	FALSE
ENSG00000257267.1	ZNF271P	1.52768438781488	0.332287152529167	-	1.05508208804657e-05	FALSE	TRUE	FALSE	FALSE	NA	-	-	0.0437	NA	NA	NA	NA	NA	NA	FALSE	FALSE	NA	NA	NA	FALSE	0.19722145040289	NA	NA	NA	NA	NA	NA	NA	NA	NA	FALSE	NA	NA	FALSE	FALSE
ENSG00000118564.10	FBXL5	52.761928888767	206.17225850949	-	1.05666148669737e-05	FALSE	TRUE	FALSE	FALSE	NA	-	+	1.18e-10	0	0	0.410736854506286	0	0	0.272365864299883	FALSE	FALSE	0	0	0.414679395567651	FALSE	0.576104473464851	-0.194066862997709	-0.958950932314102	1	0.351168954573692	-0.738164044337059	1	0.592072958712168	0.505643504883245	0.751032660824347	FALSE	rs2312934	1	FALSE	FALSE
ENSG00000128989.5	ARPP19	10.695183484081	9.94836031109542	-	1.06044790952621e-05	FALSE	TRUE	FALSE	FALSE	NA	-	-	0.662	0	0	0.648380346605989	0.340402519354715	0	0.688935649637006	FALSE	FALSE	0	0	0.454043765325082	FALSE	0.345151430953043	0.774235219716481	0.727965974262968	1	0.647111763328616	0.295531360434025	1	-0.0246621289297801	-0.168132454330125	0.236383643417666	FALSE	rs17548303	1	FALSE	FALSE
ENSG00000212907.2	MT-ND4L	951.429814611487	108136.444820017	-	1.06384595080002e-05	FALSE	TRUE	FALSE	FALSE	NA	+	NA	NA	0	0	0.374900405771058	0	0	0.639063270164354	FALSE	FALSE	0.0458716418732791	0	0.136980424652495	FALSE	0.0407891080855793	0.986247040158797	-0.0453546991253405	1	0.820668956106387	0.00900468289580316	1	-0.0673339435484134	-0.184619689407501	0.199836201064285	FALSE	NA	NA	FALSE	FALSE
ENSG00000182149.14	IST1	31.2162676630435	12.4227467282525	+	1.06810052484542e-05	TRUE	FALSE	FALSE	FALSE	NA	+	-	3.09e-06	0.396754603515287	0	0.707866838440234	0.0818585617979269	0	0.772472418834594	FALSE	FALSE	0	0	0.600626095731347	FALSE	0.392331203111976	1	1	1	-1	-1	0.731180334245366	0.233236660802416	0.0734663625906068	0.581987115283331	FALSE	rs62051556	1	FALSE	FALSE
ENSG00000140332.11	TLE3	31.5995911099223	56.7284307207875	+	1.07649257692784e-05	TRUE	FALSE	FALSE	FALSE	NA	-	+	0.0579	0.512478435948633	0.0115234018838051	0.744028649213415	0.18370586535655	0	0.51248848512897	FALSE	FALSE	0.197008816764375	0	0.516913541560049	FALSE	0.541872742428453	0.57140266066703	0.460470754726999	1	-0.000498916212281878	-0.00223274332514455	1	0.505999354638134	0.363402935579712	0.686069000392076	FALSE	rs4777190	1	FALSE	FALSE
ENSG00000170260.4	ZNF212	6.47365416404282	1.24411301970236	+	1.07667225022041e-05	TRUE	FALSE	FALSE	FALSE	NA	-	-	0.248	0	0	0.39028413337474	0	0	0.298780080006426	FALSE	FALSE	0	0	0	FALSE	0.271075298694082	0.868432268091019	0.50207734668686	1	1	0.00400350505329286	1	0.236946924809531	0.180125267752606	0.433625699438897	FALSE	rs7807569	1	FALSE	FALSE
ENSG00000234287.1	NA	26.2728612204724	778.028431482296	-	1.07739194202878e-05	FALSE	TRUE	FALSE	FALSE	NA	+	NA	NA	0.558421242834614	0	0.80534413385505	0	0	0.415994405396206	FALSE	FALSE	0	0	0.444509211695433	FALSE	0.340539038621839	1	0.483509988875455	1	0.876130406762952	-0.0899308160047594	1	0.0148913112551562	-0.138474886938457	0.425404877395597	FALSE	rs4135385	1	FALSE	FALSE
ENSG00000006756.11	ARSD	3.69398514534055	0.615094845478356	+	1.07755031816164e-05	TRUE	FALSE	FALSE	FALSE	NA	+	+	0.00442	0	0	0.488082942250789	0	0	0.500502925089705	FALSE	FALSE	0	0	0.705024971327895	FALSE	0.291969991664351	-0.531718126125419	-1	1	0.081032211190763	-0.586097770534988	1	0.326234953248115	0.232440390061373	0.593477460281471	FALSE	NA	NA	FALSE	FALSE
ENSG00000198840.2	MT-ND3	1553.35818224638	320888.716328902	-	1.08405072531841e-05	FALSE	TRUE	FALSE	FALSE	NA	-	NA	NA	0.349783967060125	0	0.622915744449786	0.225201258597408	0	0.706846056235307	FALSE	FALSE	0.395964040217952	0	0.528380223303113	FALSE	0.218838566268408	0.46820799252837	0.32328569573592	1	1	-1	1	0.154861625564972	0.0500986318918062	0.478788023963813	FALSE	NA	NA	FALSE	FALSE
ENSG00000123595.5	RAB9A	5.75146254911591	1.52370342696321	-	1.09018933997718e-05	FALSE	TRUE	FALSE	FALSE	NA	-	+	0.00612	0.560026346950998	0	0.796340753484142	0	0	0	FALSE	FALSE	0	0	0	FALSE	0.313587107529869	1	1	1	-1	-1	1	0.0718745533167965	-0.0533707358130851	0.373561846420184	FALSE	NA	NA	FALSE	FALSE
ENSG00000100994.7	PYGB	20.2942418594206	24.7281341493287	+	1.11603524067855e-05	TRUE	FALSE	FALSE	FALSE	NA	+	-	0.913	0	0	0.477173770583245	0	0	0.653266934131738	FALSE	FALSE	0	0	0.539693184462703	FALSE	0.652848013337038	0.813597613959835	0.923935706903715	1	0.817482522920892	0.57230167787373	1	0.504058860347945	0.40501721820088	0.731144301853511	FALSE	rs845794	1	FALSE	FALSE
ENSG00000135924.11	DNAJB2	16.0956034050332	7.63281875281315	+	1.11812932753741e-05	TRUE	FALSE	FALSE	FALSE	NA	+	+	0.0374	0.336327765833728	0	0.673787888411128	0.00472080664047848	0	0.581841162375159	FALSE	FALSE	0.526128694299172	0	0.765225238088568	FALSE	0.455348707974437	-1	-1	1	1	0.616634900432679	1	0.658268561290944	0.584388913232356	0.792676608000551	FALSE	rs35404076	0.700041765133989	TRUE	FALSE
ENSG00000100227.13	POLDIP3	40.4280022327563	21.8684372366302	+	1.12243941467553e-05	TRUE	FALSE	FALSE	FALSE	NA	+	-	0.063	0.185415290554485	0	0.655632612352725	0	0	0.676540428496502	FALSE	FALSE	0	0	0.119543179826432	FALSE	0.630786329535982	0.717701683789353	0.705530080302918	1	0.692277797153102	0.498904119397725	1	0.314032342831833	0.214082447367938	0.493646644970626	FALSE	rs130377	1	FALSE	FALSE
ENSG00000268485.1	NA	8.55431596995428	4.24530864663977	+	1.12651827678369e-05	TRUE	FALSE	FALSE	FALSE	NA	+	NA	NA	0	0	0.330279481480342	0	0	0.412702103797996	FALSE	FALSE	0.0188706368315102	0	0.736940515514187	FALSE	0.461794943039733	NA	-1	1	NA	0.302989339767691	1	NA	0.452685747577041	0.782127034108518	FALSE	rs13422330	1	FALSE	FALSE
ENSG00000102978.8	POLR2C	16.1768109903382	4.21105298387234	-	1.14169054521755e-05	FALSE	TRUE	FALSE	FALSE	NA	-	-	0.00173	0.587071188888399	0	0.860855797966842	0	0	0.325546800280019	FALSE	FALSE	0	0	0.340272038160929	FALSE	0.360044456793554	1	1	1	1	-0.000703764473228026	1	-0.0376914229506177	-0.193648940159837	0.241256413097994	FALSE	rs2216758	0.873849327958655	TRUE	FALSE
ENSG00000151779.8	NBAS	2.78057155632523	0.403386230491096	+	1.14304730970792e-05	TRUE	FALSE	FALSE	FALSE	NA	+	-	0.0602	0	0	0.14657013450194	0.0975695224550607	0	0.731570808750975	FALSE	FALSE	0	0	0.520101504668203	FALSE	0.475909974993054	1	-0.335216628734446	1	0.640498194568241	0.00307142435815888	1	0.363160467151065	0.317811885467709	0.578316391210825	FALSE	rs10427198	1	FALSE	FALSE
ENSG00000108278.7	NA	3.90191848201936	1.50236819119344	-	1.14599764871515e-05	FALSE	TRUE	FALSE	FALSE	NA	+	NA	NA	0.505575994709551	0	0.746302410832665	0	0	0.526462655065708	FALSE	FALSE	0	0	0.346177281796862	FALSE	0.252570158377327	1	1	1	1	-0.00279816637126563	1	0.083814236180036	-0.0549510675775869	0.347135428956662	FALSE	rs9891800	1	FALSE	FALSE
ENSG00000172270.13	BSG	112.022393555467	325.580937109377	+	1.15363486693212e-05	TRUE	FALSE	FALSE	FALSE	NA	-	+	0.111	0	0	0.823123609317524	0.528218648883539	0	0.709738707982769	FALSE	FALSE	0	0	0.389126165178245	FALSE	0.601111419838844	1	1	1	1	-0.0384637906144441	1	0.186973015143438	-0.144774764276802	0.456300437295968	FALSE	rs1558134	1	FALSE	FALSE
ENSG00000111684.6	LPCAT3	13.5499052684635	4.47239838161918	+	1.16439614795206e-05	TRUE	FALSE	FALSE	FALSE	NA	+	+	0.000286	0.348248998378816	0	0.640006536928221	0	0	0.721186456163084	FALSE	FALSE	0.145066497984888	0	0.507430299162921	FALSE	0.421228118921923	1	0.818545461706217	1	1	0.00464526767223452	1	0.305867488754502	0.178857797022171	0.510832645355192	FALSE	rs2178695	1	FALSE	FALSE
ENSG00000169976.5	SF3B5	55.7946715353261	212.428655779167	-	1.16462289030626e-05	FALSE	TRUE	FALSE	FALSE	NA	-	+	0.0113	0.572527308281574	0.0543755763527179	0.695200340446817	0	0	0.434124158785935	FALSE	FALSE	0.15517193375727	0	0.666498799297709	FALSE	0.293025840511253	-1	-1	1	-1	-1	1	0.230508929535346	0.126012339723938	0.486536792041828	FALSE	rs960710	0.302663983345701	TRUE	FALSE
ENSG00000134291.7	TMEM106C	3.16414097575576	0.602592260604681	-	1.1689329012705e-05	FALSE	TRUE	FALSE	FALSE	NA	+	+	0.796	0.324993933532923	0	0.62544512846921	0	0	0.497906238250979	FALSE	FALSE	0.271076364985838	0	0.540563459471243	FALSE	0.454681856071131	0.823617968968853	-0.987890357646847	1	1	0.00178909689278462	1	0.346435592448107	0.226611163040021	0.607351691547496	FALSE	rs12302370	1	FALSE	FALSE
ENSG00000230207.1	RPL4P5	17.6372589215686	37.1430590271886	-	1.16997240216921e-05	FALSE	TRUE	FALSE	FALSE	NA	-	NA	NA	0.505246019996579	0.0247156347194423	0.674260984002391	0	0	0.466870721844774	FALSE	FALSE	0.374962818537362	0	0.539741981976983	FALSE	0.167324256737983	1	-0.917177241395169	1	-1	-1	1	-0.031025443330756	-0.200858967923167	0.391991904705522	FALSE	rs12336438	1	FALSE	FALSE
ENSG00000149273.8	RPS3	91.6269354825009	999.805516178852	-	1.17890904232634e-05	FALSE	TRUE	FALSE	FALSE	NA	-	NA	NA	0.692030374059364	0.40200332609535	0.776223941031933	0	0	0.519863738759311	FALSE	TRUE	0.135037625277973	0	0.679784973598429	FALSE	0.201778271742151	-0.391249032985898	-1	1	-1	-1	1	0.223152761687706	0.0408402897958171	0.475722344065258	FALSE	rs2851147	1	FALSE	FALSE
ENSG00000100888.8	CHD8	9.48964702863594	3.84849860952598	+	1.18101443396862e-05	TRUE	FALSE	FALSE	FALSE	NA	+	NA	NA	0	0	0.186650016386085	0	0	0.631319223558349	FALSE	FALSE	0	0	0	FALSE	0.294748541261462	0.21186969318657	-0.189464401905351	1	0.166040394850998	-0.123896610976533	0.999972538921912	0.232816845485851	0.149230469009309	0.47225754237625	FALSE	rs4470055	1	FALSE	FALSE
ENSG00000141552.13	ANAPC11	8.77196855095541	5.41527512302648	-	1.20660332269291e-05	FALSE	TRUE	FALSE	FALSE	NA	-	+	0.0537	0.667898535639933	0.310284611427542	0.827906993363481	0	0	0.0667769849669977	FALSE	TRUE	0.316763521472944	0	0.763015945029973	FALSE	0.353709363712142	1	0.769600916251766	1	-1	-1	1	0.206154702184402	-0.0436460019378539	0.562331729969359	FALSE	rs8073904	1	FALSE	FALSE
ENSG00000228502.1	EEF1A1P11	12.7398322226225	22.9869504810061	-	1.21240429945051e-05	FALSE	TRUE	FALSE	FALSE	NA	-	NA	NA	0	0	0.627170759084813	0.0979596532807537	0	0.316940203020418	FALSE	FALSE	0.146214551821106	0	0.540204615163673	FALSE	0.27857738260628	-1	-1	1	-1	-1	1	0.240990235231196	0.163924038548455	0.49248749891246	FALSE	rs56006685	1	FALSE	FALSE
ENSG00000120885.14	CLU	9.79091839515518	36.5301517519401	+	1.21470163583948e-05	TRUE	FALSE	FALSE	FALSE	NA	+	NA	NA	0.118637846156314	0	0.71380364442311	0.191146642017911	0	0.762080683390897	FALSE	FALSE	0	0	0.216750261702758	FALSE	0.62267296471242	1	0.997803999005616	1	0.888268197724374	0.00427443808798997	1	0.220561912908864	-0.191105057029325	0.589438287188438	FALSE	rs17362694	1	FALSE	FALSE
ENSG00000260043.1	NA	19.6563838511561	30.2819949423396	+	1.21684274605582e-05	TRUE	FALSE	FALSE	FALSE	NA	+	NA	NA	0.0186804918158645	0	0.7926728560945	0.369842102046261	0	0.600807128496611	FALSE	FALSE	0.394321533811168	0	0.644037671008774	FALSE	0.522700750208391	0.67137077609764	0.117752106522741	1	1	0.0054780907507828	1	0.504066874079942	0.414282388114037	0.763582684501822	FALSE	rs148702283	1	FALSE	FALSE
ENSG00000198839.5	ZNF277	1.29120617816092	0.270145648696836	-	1.22925997381249e-05	FALSE	TRUE	FALSE	FALSE	NA	-	-	0.00301	0.671212384315318	0.0698048778349876	0.858244896776975	0.344286078462779	0	0.59937857804927	FALSE	FALSE	0.600219437788235	0	0.822766665495935	FALSE	0.07707696582384	-0.0474376194170964	-1	1	0.0203431431382169	0.000456048351677301	1	0.25013027800384	0.074494443982992	0.625042942489653	FALSE	rs11768354	1	FALSE	FALSE
ENSG00000132589.10	FLOT2	254.137392193141	3345.85062418398	+	1.24291185650783e-05	TRUE	FALSE	FALSE	FALSE	NA	-	+	0.284	0.610964947382534	0.207262370078504	0.79099844340203	0	0	0.517504607783313	FALSE	TRUE	0	0	0.399056126588437	FALSE	0.52770213948319	1	1	1	-1	-1	1	0.185516714058649	0.109747325747482	0.492570034156878	FALSE	rs3760456	1	FALSE	FALSE
ENSG00000104408.5	EIF3E	13.9294869905026	29.8143832845846	-	1.24771008836773e-05	FALSE	TRUE	FALSE	FALSE	NA	-	-	1.22e-21	0.683875336384151	0.259584538944092	0.807444148632326	0	0	0.415505211355434	FALSE	TRUE	0.143617332634368	0	0.627842602371442	FALSE	0.109697138093915	1	-0.815138512161642	1	-1	-1	1	0.0725076111711901	-0.0955884067227407	0.485669483872293	FALSE	rs1494965	1	FALSE	FALSE
ENSG00000232134.1	RPS15AP12	1.52447189922481	4.19576187750812	-	1.25513852901518e-05	FALSE	TRUE	FALSE	FALSE	NA	-	NA	NA	0.469241807787248	0	0.763373976177568	0	0	0.392235154818479	FALSE	FALSE	0.289221308285791	0	0.492294754244746	FALSE	0.210558488469019	-1	-1	1	0.00158649575358987	-0.000548018326893717	1	0.165105001252857	0.0217020869421679	0.412215160604926	FALSE	rs12754802	1	FALSE	FALSE
ENSG00000060069.12	CTDP1	14.244642061742	4.84436601444417	+	1.25589709678529e-05	TRUE	FALSE	FALSE	FALSE	NA	+	+	0.000998	0	0	0.424294887799527	0.151650540063277	0	0.58377602958551	FALSE	FALSE	0	0	0.480203180522017	FALSE	0.384551264240067	1	0.83696728342177	1	-0.999669167582195	-0.00561413119554369	1	0.309117785013328	0.163657567037303	0.549508531715394	FALSE	rs9957751	1	FALSE	FALSE
ENSG00000262758.1	NA	7.19645963912631	1.88565598360161	+	1.25733281889149e-05	TRUE	FALSE	FALSE	FALSE	NA	+	NA	NA	0.443746568672546	0	0.705886087623145	0	0	0.244737214776334	FALSE	FALSE	0.0629923852972779	0	0.469812654561372	FALSE	0.122756321200333	1	0.828733251445331	1	1	0.00276177628436666	1	0.114268661709548	-0.0231285901932741	0.428525681080295	FALSE	rs7216464	1	FALSE	FALSE
ENSG00000137198.5	GMPR	6.61491400270149	15.2512633897333	+	1.2725245348078e-05	TRUE	FALSE	FALSE	FALSE	NA	-	+	0.0278	0	0	0.459995163660303	0.0620188618643855	0	0.576109641639562	FALSE	FALSE	0	0	0.448924147463869	FALSE	0.314476243400945	1	-0.598553031936139	1	-1	-1	1	0.516941631739663	0.246700350843866	0.762481878348651	FALSE	rs12211264	1	TRUE	FALSE
ENSG00000105372.2	RPS19	136.971430716544	2641.63171247402	-	1.27931142124981e-05	FALSE	TRUE	FALSE	FALSE	NA	-	-	0.000566	0.617379393534515	0.09887089158066	0.700216524082121	0	0	0.448987007543068	FALSE	FALSE	0	0	0.317029817878296	FALSE	0.221339260905807	1	-0.875533556690313	1	-1	-1	-0.0137745866121602	0.31682339813982	0.166504219702156	0.638297737941898	FALSE	rs4803523	0.639966349585192	TRUE	FALSE
ENSG00000228253.1	MT-ATP8	1294.13177548544	258258.658609423	-	1.29574400186975e-05	FALSE	TRUE	FALSE	FALSE	NA	-	NA	NA	0	0	0.290397851440562	0	0	0.646385541663304	FALSE	FALSE	0	0	0.307294827531874	FALSE	-0.0207835509863851	0.938553720910731	-1	1	0.497405268301612	-0.738653750921673	1	0.0639254200609978	-0.0192686576322787	0.337704109131587	FALSE	NA	NA	FALSE	FALSE
ENSG00000138430.11	OLA1	2.11547356645675	0.274142168991551	-	1.30824132097018e-05	FALSE	TRUE	FALSE	FALSE	NA	-	NA	NA	0.470987931838496	0	0.751076568771265	0	0	0.525402425428168	FALSE	FALSE	0.26850357674345	0	0.421709160498925	FALSE	0.126757432620172	-1	-1	1	-0.00544139350833903	-0.00539200735379506	0.373568253268216	0.187460601792931	0.0102798489813367	0.48647228126366	FALSE	rs6759870	1	FALSE	FALSE
ENSG00000108883.8	EFTUD2	15.932503015008	9.36220876474115	+	1.32765455204106e-05	TRUE	FALSE	FALSE	FALSE	NA	+	-	0.402	0	0	0.0522923469343541	0.266655860144972	0	0.600254418477984	FALSE	FALSE	0	0	0.232063814718123	FALSE	0.511642122811892	1	0.697907941115233	1	0.937925098843015	0.74873573270669	1	0.0802890677520126	0.0282123878573811	0.476318461309663	FALSE	rs117420614	1	FALSE	FALSE
ENSG00000127184.6	COX7C	5.99324698492462	20.92734278593	-	1.35757018041301e-05	FALSE	TRUE	FALSE	FALSE	NA	+	NA	NA	0.400767678529828	0	0.60682730624806	0.0471829874041822	0	0.435998679001174	FALSE	FALSE	0.106226337012914	0	0.670958965026098	FALSE	0.289469297026952	1	0.424987012246076	1	-1	-1	1	-0.0034496060006301	-0.153974617688346	0.320282706966176	FALSE	rs72783711	1	FALSE	FALSE
ENSG00000205670.6	SMIM11A	1.31796939871152	0.145359473884583	-	1.36214024407895e-05	FALSE	TRUE	FALSE	FALSE	NA	-	-	3.24e-13	0.505430121661039	0.0623434723337768	0.767663312455773	0.13407043157518	0	0.461464105231134	FALSE	FALSE	0.135563693346766	0	0.382111303066186	FALSE	0.209613781606002	0.655408140419521	-0.0534669862904501	1	0.00214171221388884	0.00150007643557441	1	0.127852109859095	0.0179236263225248	0.338334739489312	FALSE	rs2284613	1	FALSE	FALSE
ENSG00000196535.9	MYO18A	17.2344911803136	11.5743433061502	+	1.36980026803383e-05	TRUE	FALSE	FALSE	FALSE	NA	+	+	0.00423	0	0	0.216389626494208	0.0345443125416506	0	0.639545793049951	FALSE	FALSE	0	0	0.0667728373619863	FALSE	0.556265629341484	0.997250236246288	0.889508361024568	1	0.696492328483399	0.0804177834240734	1	0.367022639969481	0.253286341088925	0.639749872550005	FALSE	rs12949907	1	FALSE	FALSE
ENSG00000173272.9	MZT2A	3.95346395348837	1.44622268699432	-	1.37876669363344e-05	FALSE	TRUE	FALSE	FALSE	NA	-	+	0.842	0	0	0.158477794107831	0	0	0.380245490299068	FALSE	FALSE	0.325189851810386	0	0.590700976676779	FALSE	0.588274520700195	0.987774287915899	0.682481481116588	1	0.878840549372526	0.473090327064695	1	0.415298423696588	0.286299030129454	0.648298819709045	FALSE	rs272137	1	FALSE	FALSE
ENSG00000254719.1	NA	5.11635326086956	23.9997201516102	-	1.38452115710483e-05	FALSE	TRUE	FALSE	FALSE	NA	-	NA	NA	0.539345507074093	0	0.682035555896547	0	0	0.160203927484291	FALSE	FALSE	0.10431126897034	0	0.314356655577807	FALSE	0.298582939705474	1	0.721757776050353	1	0.804405199455514	-0.00587527173642751	1	0.00169322340476353	-0.173763485967657	0.338815678700055	FALSE	rs10840556	1	FALSE	FALSE
ENSG00000132967.9	HMGB1P5	3.9552509009009	2.34182061816511	-	1.39028134992245e-05	FALSE	TRUE	FALSE	FALSE	NA	-	NA	NA	0.563802275646102	0	0.831450580276387	0.0922070172836797	0	0.407222749348376	FALSE	FALSE	0	0	0.41513043497035	FALSE	0.24356765768269	1	-0.509047446383252	1	-1	-1	1	0.105823218887292	0.0150915770581633	0.438722490056542	FALSE	rs56222405	1	FALSE	FALSE
ENSG00000148488.10	ST8SIA6	0.131884835128959	0.0113043745183913	-	1.39537133462975e-05	FALSE	TRUE	FALSE	FALSE	NA	+	NA	NA	0	0	0.226097927471172	0.122169921379025	0	0.463324227370025	FALSE	FALSE	0	0	0.317613818606522	FALSE	0.224395665462629	-0.077658532309284	-0.955664393661472	1	-1	-1	1	0.286697572626201	0.158461409502337	0.487902802738566	FALSE	rs11254653	1	FALSE	FALSE
ENSG00000179562.2	GCC1	10.4469361947791	1.91566982177106	+	1.40119311466335e-05	TRUE	FALSE	FALSE	FALSE	NA	+	+	0.527	0.415566059364254	0	0.647319695911032	0	0	0.555527294785915	FALSE	FALSE	0.329982470623204	0	0.582717924882735	FALSE	0.321867185329258	-1	-1	1	-0.0254688969356768	-1	1	0.241731847959046	0.0646165075923306	0.452945698567755	FALSE	rs17867725	0.825306089302873	TRUE	FALSE
ENSG00000121210.11	KIAA0922	14.8477787326935	7.89104701709267	+	1.41564291248346e-05	TRUE	FALSE	FALSE	FALSE	NA	+	-	1.43e-10	0	0	0.423107944695594	0.0821492331608409	0	0.654500164133421	FALSE	FALSE	0	0	0	FALSE	0.542372881355932	1	1	1	-0.0680777147050775	-1	1	0.188285292257784	0.0280891113940563	0.494529400928257	FALSE	rs10022400	1	FALSE	FALSE
ENSG00000174946.5	GPR171	4.81726834542411	5.52407112727751	-	1.41577211270696e-05	FALSE	TRUE	FALSE	FALSE	NA	-	NA	NA	0.563241944832958	0	0.775048913638527	0.319912634883418	0	0.607163006553902	FALSE	FALSE	0	0	0.263386858623522	FALSE	0.464517921644901	0.695841885224695	0.870873772852862	1	-0.00256348496219963	-1	1	-0.0130210501631759	-0.123340201612423	0.279883895858249	FALSE	rs10513368	1	FALSE	FALSE
ENSG00000168899.4	VAMP5	28.0901876531863	206.295934986576	-	1.43686464524347e-05	FALSE	TRUE	FALSE	FALSE	NA	+	+	1.13e-36	0.232416142534198	0	0.614914802607584	0.57827553243518	0.0429451101715105	0.740276173099533	FALSE	FALSE	0	0	0.346192251634524	FALSE	0.526535148652404	1	1	1	-1	-1	1	0.166228360428592	-0.00715745743989051	0.558046469793611	FALSE	rs11682055	1	FALSE	FALSE
ENSG00000109323.4	MANBA	6.52916621549262	1.55180470895928	+	1.44817198378829e-05	TRUE	FALSE	FALSE	FALSE	NA	-	+	0.0216	0.406873881975672	0	0.768931467326094	0.563615866169919	0.0765437868573154	0.8341867831019	FALSE	FALSE	0.0979823135372326	0	0.66670934305301	FALSE	0.285690469574882	0.825900708322081	0.704042362724985	1	-1	-1	-0.00392870835924787	0.42031735185985	0.336776755117079	0.686413852562792	FALSE	rs13114343	1	FALSE	FALSE
ENSG00000119522.11	DENND1A	6.03836055810996	1.5561677575426	+	1.45235214470976e-05	TRUE	FALSE	FALSE	FALSE	NA	+	+	1.68e-11	0	0	0.629332999450101	0	0	0.562218625233966	FALSE	FALSE	0	0	0.284458720951033	FALSE	0.358710752986941	1	1	1	-1	-1	1	-0.352029865403936	-0.451778188687352	0.0599141336416533	FALSE	rs1463729	1	FALSE	FALSE
ENSG00000198856.8	OSTC	8.44144661700807	7.57905437410142	-	1.45241111747684e-05	FALSE	TRUE	FALSE	FALSE	NA	-	-	0.00771	0.146297835460981	0	0.484888504886514	0	0	0.0632297163718128	FALSE	FALSE	0.399117011695926	0	0.606953580980393	FALSE	0.306696304529036	-0.849665571099736	-1	1	-1	-1	0.00870041982941225	0.359422593431139	0.267355003500418	0.58216217002877	FALSE	rs55686473	1	FALSE	FALSE
ENSG00000118640.6	VAMP8	45.5134704314721	218.155574919328	-	1.4551334886551e-05	FALSE	TRUE	FALSE	FALSE	NA	-	+	4.87e-05	0.595998704701913	0	0.788438311339985	0	0	0.46582670946216	FALSE	FALSE	0.0625260619714272	0	0.647702828665959	FALSE	0.221950541817171	1	1	1	-1	-1	0.580150255694129	0.0392125879656007	-0.0866603089216015	0.348117496157144	FALSE	rs11696093	1	FALSE	FALSE
ENSG00000173141.4	MRPL57	6.81966878342246	2.48256773947929	-	1.4638109262647e-05	FALSE	TRUE	FALSE	FALSE	NA	-	-	0.252	0.338265292056715	0	0.636767658864978	0	0	0.284798670370754	FALSE	FALSE	0	0	0.337342952490605	FALSE	0.223506529591553	-0.883177869159604	-1	1	-1	-1	0.999983308766593	0.141622100953514	-0.0204534699837536	0.43842599618143	FALSE	rs4625585	1	FALSE	FALSE
ENSG00000204388.5	HSPA1B	4.01052838427948	1.13071362890788	+	1.49317455570364e-05	TRUE	FALSE	FALSE	FALSE	NA	+	-	0.137	0.466881246971495	0	0.773732261814833	0	0	0.554701024789101	FALSE	FALSE	0	0	0.318192130221816	FALSE	0.543928869130314	1	1	1	0.612042898648558	0.426425545707626	1	-0.0215807375193799	-0.2070057495668	0.348685169694837	FALSE	rs116619003	1	FALSE	FALSE
ENSG00000259305.1	ZHX1-C8orf76	6.0404421	1.95746882332025	-	1.50928321499867e-05	FALSE	TRUE	FALSE	FALSE	NA	+	NA	NA	0.603602691285398	0.135033614395556	0.769170681789673	0	0	0.471944537647638	FALSE	FALSE	0.279460591134408	0	0.713075340717353	FALSE	0.0783550986385107	-1	-1	0.571396578467003	-0.0029605648794362	-1	0.733228783751195	0.304574996075665	0.168041182823169	0.551560182073874	TRUE	rs57467627	1	FALSE	FALSE
ENSG00000177731.10	FLII	61.5692984125315	96.374418677455	+	1.52581433829305e-05	TRUE	FALSE	FALSE	FALSE	NA	+	+	0.00133	0	0	0.62944716348313	0	0	0.220460221942334	FALSE	FALSE	0	0	0.107326135401054	FALSE	0.285746040566824	1	1	1	1	-0.98820458813424	1	-0.067632613132477	-0.227665043044048	0.250615709214532	FALSE	rs9901160	1	FALSE	FALSE
ENSG00000213315.4	NA	5.02939546943231	10.84231254885	-	1.53486785347307e-05	FALSE	TRUE	FALSE	FALSE	NA	-	NA	NA	0	0	0.536315489569502	0	0	0.43443172078603	FALSE	FALSE	0	0	0.375461490688074	FALSE	0.048235621005835	-1	-1	1	1	-0.00368829183408731	1	0.0768741522168638	-0.0918932777857333	0.362630762790147	FALSE	rs10138154	1	FALSE	FALSE
ENSG00000268001.1	CARD8-AS1	9.62763593035079	15.0068433031859	-	1.54066116015828e-05	FALSE	TRUE	FALSE	FALSE	NA	-	NA	NA	0.123391801679816	0	0.621075035421214	0	0	0.218460520128065	FALSE	FALSE	0	0	0.199969717533208	FALSE	0.297249235898861	1	1	1	0.12717539493317	-1	1	-0.15272791011546	-0.348000485569358	0.344268740993497	FALSE	rs73046792	1	FALSE	FALSE
ENSG00000219928.2	NA	37.2101726878613	1364.88430884693	-	1.54079193044757e-05	FALSE	TRUE	FALSE	FALSE	NA	-	NA	NA	0	0	0.593113447854913	0	0	0.639432240244624	FALSE	FALSE	0	0	0.358163239351398	FALSE	0.18388441233676	1	0.60189461597201	1	-1	-1	1	-0.103958090094537	-0.303607702027917	0.36417913178275	FALSE	rs7862522	1	FALSE	FALSE
ENSG00000147586.4	MRPS28	1.16779199816401	0.461616567888166	-	1.54258981033522e-05	FALSE	TRUE	FALSE	FALSE	NA	-	-	0.000102	0.0511044959381185	0	0.462110989497032	0	0	0.599403607643143	FALSE	FALSE	0	0	0.486097587700565	FALSE	0.288802445123646	1	-1	1	-1	-1	1	0.086791075278954	-0.0648804433414716	0.431754593645253	FALSE	rs1051920	1	FALSE	FALSE
ENSG00000167881.9	SRP68	18.5303729873244	13.4522065292498	+	1.56717264604459e-05	TRUE	FALSE	FALSE	FALSE	NA	+	-	4.62e-07	0	0	0.58055928240475	0	0	0.439985317685231	FALSE	FALSE	0	0	0	FALSE	0.668185607113087	0.99991654939592	0.919594583389462	1	0.815051559407842	0.00432197132420425	1	0.494082088979869	0.471136609478804	0.648405293355279	FALSE	rs55885189	1	FALSE	FALSE
ENSG00000160213.5	CSTB	38.2618324457395	70.2549494956156	-	1.57416552153039e-05	FALSE	TRUE	FALSE	FALSE	NA	-	+	9.71e-06	0.508472623345035	0.0730623402516295	0.713925825024664	0.234824426763407	0	0.638672593509951	FALSE	FALSE	0	0	0.643201735541388	FALSE	0.42217282578494	1	1	1	-1	-1	0.123368986363655	0.394663689034961	0.267819715214644	0.670657610085939	FALSE	rs564779	1	FALSE	FALSE
ENSG00000143771.7	CNIH4	3.45607254025923	0.967929225974626	-	1.57713891414952e-05	FALSE	TRUE	FALSE	FALSE	NA	-	+	6.78e-09	0.34980513019564	0	0.68761334409319	0.344556099771051	0	0.693889684652521	FALSE	FALSE	0	0	0.206732559910824	FALSE	0.633453737149208	1	1	1	-1	-1	1	0.330754358651485	0.209543921983864	0.564913098844086	FALSE	rs10915708	1	FALSE	TRUE
ENSG00000110801.8	PSMD9	3.36495059001254	0.289804417605968	-	1.58441557368539e-05	FALSE	TRUE	FALSE	FALSE	NA	+	+	0.668	0.462868142384652	0	0.689088717199621	0	0	0.325471249349917	FALSE	FALSE	0	0	0.576285232319547	FALSE	0.251736593498194	-1	-1	1	1	-1	1	0.248918164200359	0.013467544200762	0.507067032619581	FALSE	rs77165791	1	FALSE	FALSE
ENSG00000161980.5	POLR3K	4.77560836426299	1.81940602108119	-	1.58632291211941e-05	FALSE	TRUE	FALSE	FALSE	NA	-	-	0.0139	0.271282322411316	0	0.647159120895539	0	0	0.29223695233688	FALSE	FALSE	0	0	0.402452198387516	FALSE	0.46046123923312	1	0.836186669928129	1	0.15392343215478	-1	1	0.219308936986807	0.0898958195295588	0.441504272231419	FALSE	rs383508	1	FALSE	FALSE
ENSG00000197744.5	PTMAP2	44.9954459355828	127.765231536585	-	1.58956126216663e-05	FALSE	TRUE	FALSE	FALSE	NA	-	NA	NA	0.366929921371751	0	0.545152513836337	0	0	0.397427259130845	FALSE	FALSE	0.0458889582591469	0	0.695287286080423	FALSE	0.268963601000278	-1	-1	1	0.204981478498454	-1	1	0.187146078979626	0.0874490030973249	0.422931567539092	FALSE	rs6595125	1	FALSE	FALSE
ENSG00000110713.11	NUP98	14.5557202718437	8.36250613382329	+	1.59309803719297e-05	TRUE	FALSE	FALSE	FALSE	NA	+	-	0.212	0.577443014025487	0.0463315542432728	0.684234887934284	0	0	0.529117418286279	FALSE	FALSE	0	0	0.0794723918782068	FALSE	0.281967213114754	1	-0.685305273103327	1	-1	-1	0.515201921977485	0.199892112199238	0.0494385256493356	0.500758192942435	FALSE	rs10835226	1	FALSE	FALSE
ENSG00000182118.5	FAM89A	0.778751412724989	0.149543864261153	-	1.59642344571826e-05	FALSE	TRUE	FALSE	FALSE	NA	-	-	0.0225	0.471301288445423	0	0.836563212958873	0.261854365120239	0	0.635698282183601	FALSE	FALSE	0.411818574717961	0	0.65752159803242	FALSE	0.410058349541539	0.439020327883626	0.238735484680415	1	0.000250178179119845	-0.000980373951471992	1	0.192818984841823	0.0007174933305534	0.598595074980474	FALSE	rs16854957	1	FALSE	FALSE
ENSG00000263875.1	NA	13.0227336448598	45.1267553272942	+	1.59721341137023e-05	TRUE	FALSE	FALSE	FALSE	NA	-	NA	NA	0	0	0.502308374545546	0	0	0.239418585570671	FALSE	FALSE	0	0	0.292883238499139	FALSE	0.050680744651292	1	-0.697442241545011	1	-1	-1	1	0.0182669321481709	-0.108897837991916	0.288063334684249	FALSE	rs7031721	1	FALSE	FALSE
ENSG00000251562.3	MALAT1	204.319472392902	7135.62963295833	+	1.61862249452958e-05	TRUE	FALSE	FALSE	FALSE	NA	+	NA	NA	0.165023845841175	0	0.652489678124308	0	0	0.301540059999194	FALSE	FALSE	0	0	0.532840308171877	FALSE	0.132703528757988	1	0.981479708888785	1	1	-0.14065689051053	1	0.122923629564209	-0.072397701755338	0.374830286973276	FALSE	rs74641987	1	FALSE	TRUE
ENSG00000140264.15	SERF2	33.4379639668802	54.3087178573669	-	1.62853277268945e-05	FALSE	TRUE	FALSE	FALSE	NA	-	+	0.967	0.388022830649497	0	0.720330208995703	0	0	0	FALSE	FALSE	0	0	0.108593900358718	FALSE	0.312809113642679	1	1	1	0.066272435664018	-1	1	-0.0817539510194012	-0.266974894207105	0.281739003128865	FALSE	rs58231277	1	FALSE	FALSE
ENSG00000239665.2	NA	3.87630631634124	0.411102924567071	+	1.63792248190573e-05	TRUE	FALSE	FALSE	FALSE	NA	+	NA	NA	0	0	0.310070277716747	0.663198939944375	0.148009440290362	0.865581067146105	TRUE	FALSE	0.63071969488471	0.100461389349082	0.817900198872014	TRUE	0.45440400111142	0.287954380490866	-0.0336232270217777	1	0.00399398299846036	0.00453531163850037	1	0.534011086543975	0.329737454866051	0.847231550110101	FALSE	rs7073026	0.548449371881711	TRUE	FALSE
ENSG00000236698.1	EIF1AXP1	4.40592453917051	4.66547073161019	-	1.66749384417445e-05	FALSE	TRUE	FALSE	FALSE	NA	-	NA	NA	0.402642860329015	0	0.751797219299693	0	0	0.595737736674653	FALSE	FALSE	0	0	0.441131900178759	FALSE	0.248791330925257	1	-0.99994845083719	1	-1	-1	1	0.0872506065162777	0.00344405133218692	0.414348156859186	FALSE	rs74394813	1	FALSE	FALSE
ENSG00000133606.6	MKRN1	38.6780172288642	53.3371734629284	+	1.67294449146839e-05	TRUE	FALSE	FALSE	FALSE	NA	-	+	0.138	0.595794126875777	0	0.80939578060564	0.49210690269825	0	0.857613574012764	FALSE	FALSE	0.0922702361809866	0	0.676068456094662	FALSE	0.377882745207002	0.741412985615208	0.528167436160534	1	-1	-1	1	0.390929914541431	0.192434772538709	0.665305572864649	FALSE	rs13235624	1	FALSE	FALSE
ENSG00000135070.9	ISCA1	3.14830930517294	1.03343900618429	-	1.70268683634559e-05	FALSE	TRUE	FALSE	FALSE	NA	-	-	0.0361	0.454786217719813	0	0.838310295273897	0	0	0.3976022552864	FALSE	FALSE	0	0	0.638916821153795	FALSE	0.298416226729647	1	1	1	0.857556001230116	-1	1	-0.101381092313578	-0.197816479580751	0.281064813704526	FALSE	rs1410132	1	FALSE	FALSE
ENSG00000100387.8	RBX1	3.38913520408163	1.92318619863376	-	1.72779204999204e-05	FALSE	TRUE	FALSE	FALSE	NA	+	+	0.195	0.445842503625237	0	0.729234946171497	0.069838013629244	0	0.314243346026604	FALSE	FALSE	0.308920247951934	0	0.59248689253471	FALSE	0.308974715198666	-1	-1	1	-0.000215654336146117	-0.00253167565142228	1	0.164979520879729	0.0761029783587148	0.47310790529954	FALSE	rs1108047	1	FALSE	FALSE
ENSG00000149476.10	TKFC	6.25347114437053	4.05753230008455	+	1.73427429239868e-05	TRUE	FALSE	FALSE	FALSE	NA	+	+	0.518	0.515716624630416	0	0.794270135941277	0	0	0.480859092857639	FALSE	FALSE	0.00425710999707361	0	0.604607961112644	FALSE	0.59444290080578	1	0.513940745165665	1	-0.387058360880221	-0.00067184897788436	1	0.520700297092185	0.494922306670583	0.723794839561089	FALSE	rs1615167	1	FALSE	FALSE
ENSG00000109270.8	LAMTOR3	2.82509397961602	1.79385160254576	-	1.73537619652849e-05	FALSE	TRUE	FALSE	FALSE	NA	-	+	0.636	0	0	0.660411590808798	0	0	0.799773715922358	FALSE	FALSE	0	0	0.500798889860876	FALSE	0.317310363989997	0.347616222029115	0.439894785395692	1	0.386935959164437	0.0728901701230647	1	0.215262518959208	0.112049214523326	0.406034838001795	FALSE	rs17029292	1	FALSE	FALSE
ENSG00000263900.1	NA	1050.87258885542	91618.0390889653	+	1.74936876169528e-05	TRUE	FALSE	FALSE	FALSE	NA	+	NA	NA	0.266056811321322	0	0.737061949078245	0	0	0.412282139765159	FALSE	FALSE	0	0	0.566251096843921	FALSE	0.24106696304529	1	0.837649909742573	1	-1	-1	1	-0.0656557369214169	-0.2100075470125	0.405206080685295	FALSE	rs6964614	1	FALSE	FALSE
ENSG00000142192.15	APP	7.30275178973616	4.53894544444607	+	1.76876636988678e-05	TRUE	FALSE	FALSE	FALSE	NA	+	+	0.203	0	0	0.622236575955152	0.476154224782019	0	0.86706552964586	FALSE	FALSE	0	0	0.5666048577395	FALSE	0.285023617671575	1	0.0258918978010264	1	0.0974758214151602	-1	1	0.0508033713016202	-0.126283097437389	0.305859936379192	FALSE	rs2830230	1	FALSE	FALSE
ENSG00000112983.13	BRD8	8.44943334759053	1.60703889742414	+	1.77635536944771e-05	TRUE	FALSE	FALSE	FALSE	NA	+	-	0.289	0	0	0.409005447969982	0.210802401654629	0	0.444417144225378	FALSE	FALSE	0.0379750437948756	0	0.53438906022722	FALSE	0.320311197554876	1	0.574519888759723	1	1	0.000745031014991724	1	0.386783262078657	0.269275392016449	0.627666919690807	FALSE	rs13156862	1	FALSE	FALSE
ENSG00000112079.8	STK38	69.7850002456485	112.660897692407	+	1.80997130312067e-05	TRUE	FALSE	FALSE	FALSE	NA	+	+	0.139	0.487371050715836	0	0.74798442900155	0.601185217577755	0.0183831524110558	0.829833142516211	FALSE	FALSE	0.822787403247247	0.273310236555922	0.903261488052964	TRUE	0.408724645734926	-0.816351488079701	-1	0.534820975601993	1	0.00129571893363732	1	0.71128336009073	0.623039448661036	0.836729995053733	TRUE	rs262948	1	TRUE	FALSE
ENSG00000092203.8	TOX4	14.1460615270309	2.82246553014741	+	1.81782496148471e-05	TRUE	FALSE	FALSE	FALSE	NA	+	-	0.394	0.616371470796259	0	0.838450419646767	0.364915452801013	0	0.69379528660413	FALSE	FALSE	0	0	0.632846020341521	FALSE	0.462072797999444	0.913326187035743	0.764692681517797	1	-1	-0.00224376197856503	1	0.0118929136511556	-0.10146874074877	0.408427255420996	FALSE	rs73571904	1	FALSE	FALSE
ENSG00000220848.4	RPS18P9	2.97323583877996	1.8809216735868	-	1.84306635487963e-05	FALSE	TRUE	FALSE	FALSE	NA	-	NA	NA	0.0266565004632809	0	0.563598461927042	0	0	0.181882821990422	FALSE	FALSE	0.413108661321027	0	0.778976550168162	FALSE	0.0676854681856071	-1	-1	0.977539038442329	-1	-1	1	0.273078944411059	0.137972376186554	0.70135244091056	TRUE	rs2128331	1	FALSE	FALSE
ENSG00000166435.11	XRRA1	4.06932773549526	0.649163787307799	+	1.84899504377082e-05	TRUE	FALSE	FALSE	FALSE	NA	+	+	0.976	0.595389560457096	0	0.724783429586798	0.65174814280328	0	0.817103754255559	FALSE	FALSE	0.0104046168497785	0	0.267552015604436	FALSE	0.630564045568213	0.995650364598047	0.966123877999746	1	0.00222519137736722	0.00263242873057054	1	-0.114721476265461	-0.25238541952471	0.374794527078354	FALSE	rs3867275	1	FALSE	FALSE
ENSG00000198818.5	SFT2D1	9.01096511627907	5.01996307500195	-	1.85467152871816e-05	FALSE	TRUE	FALSE	FALSE	NA	-	+	0.000117	0.634246631274343	0.304231937275119	0.795084019277023	0	0	0.258280254549058	FALSE	TRUE	0	0	0.41271440974855	FALSE	0.351986662961934	1	1	1	1	0.859237923492483	1	0.181935192949682	0.0875507928354312	0.480566729653958	FALSE	rs705795	1	FALSE	FALSE
ENSG00000079308.11	TNS1	1.49299735753676	2.37966452650694	+	1.8563878898428e-05	TRUE	FALSE	FALSE	FALSE	NA	+	+	0.0974	0.435051960275485	0	0.601393739163173	0.560076572436739	0.023624442563114	0.816377168341887	FALSE	FALSE	0	0	0.353228277154312	FALSE	0.595332036676855	0.994897283124038	0.807221683852239	1	-1	-1	1	0.527372424044624	0.356777068594248	0.785492631078557	FALSE	rs13016130	1	FALSE	FALSE
ENSG00000157637.8	SLC38A10	28.9519409246575	33.1381828481781	+	1.87733072812181e-05	TRUE	FALSE	FALSE	FALSE	NA	+	+	0.0516	0	0	0.308249843631057	0	0	0.402659341807641	FALSE	FALSE	0	0	0.273240553782721	FALSE	0.384440122256182	0.885391721267801	0.707857170602835	1	0.892314206448417	0.00630771978444045	1	0.196256286458285	0.106595781803807	0.454249001227723	FALSE	rs75234847	1	FALSE	FALSE
ENSG00000259407.1	NA	11.5729678720083	6.05098604245078	+	1.87991279178008e-05	TRUE	FALSE	FALSE	FALSE	NA	+	NA	NA	0.483797133234297	0	0.782978453209055	0	0	0.450676342112848	FALSE	FALSE	0.396318422842323	0	0.699672146680486	FALSE	0.240900250069464	-0.653539793022134	-1	1	0.00198280819745375	-0.000382888626536166	1	0.437364386880268	0.223513924482385	0.762719746722291	FALSE	rs11853708	1	FALSE	FALSE
ENSG00000143799.8	PARP1	14.8933391182645	13.6434593525291	+	1.88424995930022e-05	TRUE	FALSE	FALSE	FALSE	NA	+	-	1.06e-20	0	0	0.503404537768829	0.0543236204085068	0	0.613198643653768	FALSE	FALSE	0	0	0.222752347206572	FALSE	0.665184773548208	0.354544990708045	-0.684205035810982	1	0.271356683496817	-1	1	0.569697179820062	0.49201400095823	0.739061453503902	FALSE	rs6684472	1	FALSE	FALSE
ENSG00000177700.5	POLR2L	31.9242290386304	94.5912197424495	-	1.92523762947052e-05	FALSE	TRUE	FALSE	FALSE	NA	-	+	0.971	0.336346424397883	0	0.579803862780898	0	0	0.355372549806571	FALSE	FALSE	0.272380861450816	0	0.720223479205468	FALSE	0.363712142261739	0.0662781243575998	-1	1	-1	-1	1	0.562233789047288	0.426037164774755	0.720343169776102	FALSE	rs7942840	1	FALSE	FALSE
ENSG00000119711.8	ALDH6A1	2.08382772904483	0.263302671382618	+	1.92815648579767e-05	TRUE	FALSE	FALSE	FALSE	NA	-	-	1.53e-09	0.0980872586543974	0	0.432071750728321	0.306349435231139	0	0.550473028656829	FALSE	FALSE	0	0	0.205752264415757	FALSE	0.362878577382606	1	1	1	0.00327032301412998	0.00260138758019012	1	0.149991597885097	0.0999692102358151	0.457524878861799	FALSE	rs4903117	1	FALSE	FALSE
ENSG00000173890.12	GPR160	2.07333056991906	2.01104035679406	-	1.93752869575564e-05	FALSE	TRUE	FALSE	FALSE	NA	-	+	0.262	0	0	0.609271111885527	0.0565599845003767	0	0.713444374173885	FALSE	FALSE	0	0	0.566679200728674	FALSE	0.544151153098083	1	0.925504894644728	1	0.369573129606194	-0.516407335935663	1	0.309680080600763	0.176960926277688	0.591239884583147	FALSE	rs9851636	1	FALSE	FALSE
ENSG00000148396.13	SEC16A	10.5279302956277	5.24357904671911	+	1.94830975101275e-05	TRUE	FALSE	FALSE	FALSE	NA	+	NA	NA	0	0	0.455409136674471	0	0	0.540154361483483	FALSE	FALSE	0	0	0.245806586688566	FALSE	0.242178382884135	1	0.527586005284031	1	0.357776134210829	-1	1	0.185380756243274	0.0905334617529635	0.41368057091349	FALSE	rs10858152	1	FALSE	FALSE
ENSG00000198498.5	TMA16	1.07996466771249	0.185912495148721	-	1.95744001175269e-05	FALSE	TRUE	FALSE	FALSE	NA	-	NA	NA	0.162551884077169	0	0.592161976166897	0.10454076208184	0	0.581051117832606	FALSE	FALSE	0	0	0.232122698522104	FALSE	0.109141428174493	1	0.994936957574017	1	-0.000436268054808783	-0.00127122350363897	1	0.0641587730438955	-0.0245928385427086	0.295056124902792	FALSE	rs13124397	1	FALSE	FALSE
ENSG00000015153.10	YAF2	0.840619967217656	0.0671351992349475	-	1.96924677281379e-05	FALSE	TRUE	FALSE	FALSE	NA	-	-	0.0149	0	0	0.57785120286165	0	0	0.600117526233542	FALSE	FALSE	0	0	0.248690986977886	FALSE	0.105862739649903	1	0.582645697571599	1	0.521872106254668	0.00523912213561639	1	-0.268359563012452	-0.495394954921924	0.0992619444953247	FALSE	rs17576599	1	FALSE	FALSE
ENSG00000131732.7	ZCCHC9	1.79156419578372	0.25379343928283	-	1.98341012991039e-05	FALSE	TRUE	FALSE	FALSE	NA	-	-	0.101	0.466430632497328	0	0.687325779035122	0.0542511936510476	0	0.412533938984014	FALSE	FALSE	0.0970974166295191	0	0.472791746051833	FALSE	-0.0205612670186163	1	0.53702670305858	1	-1	-0.0111478202482695	1	-0.0826314865100443	-0.188954688145434	0.139472494595362	FALSE	rs13153590	1	FALSE	FALSE
ENSG00000168701.14	TMEM208	7.3785918767507	3.79419860148613	-	2.00623725943489e-05	FALSE	TRUE	FALSE	FALSE	NA	+	+	0.00438	0.5161591217114	0	0.662672480831886	0	0	0.0454699593170363	FALSE	FALSE	0	0	0.292527815237477	FALSE	0.329647124201167	0.232830559468413	-1	1	-1	-0.926377711308433	1	0.313665138853683	0.132340090112691	0.567376173512585	FALSE	rs233551	0.888086140311646	TRUE	FALSE
ENSG00000187017.10	ESPN	1.73147385780601	1.03935383406337	+	2.04920435510496e-05	TRUE	FALSE	FALSE	FALSE	NA	-	-	0.67	0.513362616112201	0.0425788435162815	0.722817644926963	0.302306194354819	0	0.698258958214119	FALSE	FALSE	0.231892628185769	0	0.567961485224686	FALSE	0.657793831619895	0.793301973483866	0.740345346103369	1	1	-0.000801484569074089	1	0.511678958169226	0.303368750037091	0.758037405034235	FALSE	rs845246	1	FALSE	FALSE
ENSG00000228929.1	RPS13P2	13.6906624449339	43.2825356619762	-	2.05666154753363e-05	FALSE	TRUE	FALSE	FALSE	NA	-	NA	NA	0.473278846346265	0	0.662855536779305	0	0	0.249194565090871	FALSE	FALSE	0	0	0.585648514091287	FALSE	0.0943039733259239	1	0.88646104421186	1	-1	-1	0.882452249840679	-0.214447128094828	-0.482273440444222	0.215848109148299	FALSE	rs141017990	1	FALSE	FALSE
ENSG00000255339.2	NA	19.1875161688617	14.6668267324822	-	2.06835851680653e-05	FALSE	TRUE	FALSE	FALSE	NA	+	NA	NA	0.500004515160466	0	0.73085118584313	0	0	0.200456051009638	FALSE	FALSE	0	0	0.54408144015089	FALSE	0.520589052514587	1	0.118939001480249	1	1	0.0228544500373529	1	0.387547076836932	0.295767945218498	0.588080993474442	FALSE	rs61873933	1	FALSE	FALSE
ENSG00000144746.6	ARL6IP5	56.1778686928884	220.845889309149	-	2.11995689514664e-05	FALSE	TRUE	FALSE	FALSE	NA	-	+	5.5e-06	0.388658601577251	0	0.763003609660793	0	0	0.340418871559034	FALSE	FALSE	0	0	0.422959180836759	FALSE	0.231897749374826	1	1	1	-1	-1	1	-0.0540692968226434	-0.200192104975024	0.363028730512992	FALSE	rs9834743	1	FALSE	FALSE
ENSG00000214113.5	LYRM4	2.17440231558514	0.512216885447462	-	2.12035029415372e-05	FALSE	TRUE	FALSE	FALSE	NA	-	-	5.2e-11	0.560661664703889	0	0.744119418104017	0	0	0.694853136578044	FALSE	FALSE	0.0824577986637026	0	0.663940070643799	FALSE	0.443512086690748	1	1	1	1	0.00164893733132712	1	0.220372730254713	0.137115951667935	0.438997906185721	FALSE	rs2503809	1	FALSE	FALSE
ENSG00000182944.13	EWSR1	26.4273461379946	11.6628450438827	+	2.12256246206861e-05	TRUE	FALSE	FALSE	FALSE	NA	+	-	7.09e-11	0	0	0.427362428313149	0	0	0.329930857586081	FALSE	FALSE	0	0	0.458002659111745	FALSE	0.430564045568213	0.923177199812423	0.652718991735246	1	0.983459063661906	0.00422829592270546	1	0.309197386709034	0.237706401563971	0.553713662346678	FALSE	rs762817	1	FALSE	FALSE
ENSG00000106591.3	MRPL32	1.63931143767705	0.622244658388122	-	2.13107973056769e-05	FALSE	TRUE	FALSE	FALSE	NA	-	-	0.0039	0.484030336316261	0.0291852609425697	0.846597652658897	0.114364987814059	0	0.474148013955872	FALSE	FALSE	0.00925309673845818	0	0.48757747651478	FALSE	0.152764656849125	1	-0.171088618496272	1	-1	-1	1	0.0432224380086359	-0.0916103928230538	0.358012182092685	FALSE	rs10236917	1	FALSE	FALSE
ENSG00000219201.3	NA	3.64291539497307	2.39534071293968	-	2.15150546826109e-05	FALSE	TRUE	FALSE	FALSE	NA	-	NA	NA	0.525561625988036	0.088294246819678	0.716168480092509	0.150218273875087	0	0.558702202947247	FALSE	FALSE	0	0	0.0428636612896426	FALSE	0.359988885801612	1	1	1	-1	-1	1	-0.073098740186017	-0.160663557137185	0.141620697465644	FALSE	rs199693	1	FALSE	FALSE
ENSG00000198843.8	NA	6.92750308152307	13.3980929355086	-	2.17854799677359e-05	FALSE	TRUE	FALSE	FALSE	NA	-	+	0.653	0	0	0.487182019717614	0	0	0.398982743109355	FALSE	FALSE	0	0	0	FALSE	0.394665184773548	1	1	1	0.109408039934157	-0.911039014340577	0.941441533304587	0.0836576688225949	-0.0551516176513746	0.33886480231576	FALSE	rs73000063	1	FALSE	FALSE
ENSG00000137038.7	TMEM261	3.09687455892731	1.5021752174776	-	2.20146054264516e-05	FALSE	TRUE	FALSE	FALSE	NA	-	-	7.57e-18	0	0	0.369925846331423	0	0	0.353544899895094	FALSE	FALSE	0	0	0.121468641041672	FALSE	0.21789385940539	0.964074517646879	0.953534674240124	1	1	0.00395015115852169	1	-0.155087222483364	-0.265561854771852	0.116406982537677	FALSE	rs1337812	1	FALSE	FALSE
ENSG00000149196.10	HIKESHI	2.63155857998591	0.423170468530526	-	2.22253413780434e-05	FALSE	TRUE	FALSE	FALSE	NA	-	-	0.166	0.473536213959537	0	0.647124533520266	0	0	0.543032279114597	FALSE	FALSE	0.27291275827429	0	0.66374404651023	FALSE	0.33248124479022	-1	-1	1	0.283164278910276	-1	1	0.28811388580941	0.114922971498082	0.571379186192746	FALSE	rs1938927	1	FALSE	FALSE
ENSG00000188820.8	FAM26F	6.89478278341794	53.5391675224593	-	2.24660001219991e-05	FALSE	TRUE	FALSE	FALSE	NA	+	NA	NA	0.130113568729421	0	0.602554778759106	0.697736462635783	0.348594895350587	0.858531454262053	FALSE	FALSE	0	0	0	FALSE	0.626062795220895	1	1	1	1	0.00176627974262207	1	0.346559529330389	0.206906219926701	0.735478328684135	FALSE	rs9374558	1	FALSE	FALSE
ENSG00000215717.4	TMEM167B	12.2670644584937	19.5326267533793	-	2.27038226353759e-05	FALSE	TRUE	FALSE	FALSE	NA	-	NA	NA	0	0	0.45799466134669	0	0	0.235298227783607	FALSE	FALSE	0	0	0.0638373011266748	FALSE	0.343651014170603	NA	0.776947338433341	1	NA	0.15147957469614	0.957846323289591	NA	0.063080658606785	0.5873733353437	FALSE	rs12134009	1	FALSE	FALSE
ENSG00000159023.14	EPB41	29.9721254389683	45.1730292969329	+	2.28857902813771e-05	TRUE	FALSE	FALSE	FALSE	NA	-	+	0.418	0	0	0.691415954817773	0.348308321389163	0	0.909602309389895	FALSE	FALSE	0	0	0.442557493066235	FALSE	0.148819116421228	1	0.669206620503379	1	-0.519837450027408	-1	1	-0.110288754663891	-0.271393873241491	0.285207985543976	FALSE	rs4387200	1	FALSE	FALSE
ENSG00000163807.4	KIAA1143	4.15004923377118	1.62994105448227	-	2.30320348602187e-05	FALSE	TRUE	FALSE	FALSE	NA	-	NA	NA	0	0	0.674319353873684	0	0	0.295559980138515	FALSE	FALSE	0	0	0	FALSE	0.31308696860239	1	0.999856419089261	1	0.441173762080739	-0.0882607846525411	1	0.0119747127605438	-0.101661405755739	0.252032089335596	FALSE	rs6441819	1	FALSE	FALSE
ENSG00000133321.6	RARRES3	46.0936172609718	417.758613545949	-	2.31582004472522e-05	FALSE	TRUE	FALSE	FALSE	NA	+	+	4.05e-09	0.71505200703488	0.294490977929154	0.854232473717214	0.00891335491869363	0	0.660953023352932	FALSE	FALSE	0	0	0.0887995956679781	FALSE	0.455682133926091	1	1	1	-1	-1	0.237141839291778	0.531373828615428	0.441633829434841	0.779843642394382	FALSE	rs4963328	1	FALSE	FALSE
ENSG00000136026.9	CKAP4	18.8564729218277	44.6883501494333	+	2.3259211637869e-05	TRUE	FALSE	FALSE	FALSE	NA	+	+	2.15e-23	0.00782015621700871	0	0.669234685255494	0.16628682321059	0	0.826203064241757	FALSE	FALSE	0.463832659541994	0	0.800531648195528	FALSE	0.511808835787719	-1	-1	1	1	0.0013384975607618	1	0.630427631749612	0.475789735336537	0.784074130217853	FALSE	rs10861501	1	FALSE	FALSE
ENSG00000083937.4	CHMP2B	6.04132474185221	3.95296005332691	-	2.33820995116271e-05	FALSE	TRUE	FALSE	FALSE	NA	-	+	0.787	0	0	0.506803748239545	0	0	0.334294474361308	FALSE	FALSE	0	0	0.149142745213658	FALSE	0.319255348707975	0.994332424097457	0.0513867752343106	1	0.337805215604786	-0.252514092236464	1	0.128140247608893	-0.052489519584407	0.341110404599185	FALSE	rs6786970	1	FALSE	TRUE
ENSG00000228205.1	NA	21.9890449726402	69.4310340088642	-	2.3385731627311e-05	FALSE	TRUE	FALSE	FALSE	NA	-	NA	NA	0.358845053094886	0	0.586015118682221	0	0	0.552846927523906	FALSE	FALSE	0	0	0.249594556876089	FALSE	0.199055293136983	-0.245340834291154	-1	1	-0.522000217332801	-1	0.0622396647366763	0.183607697746586	0.00914103489526513	0.404613109971869	FALSE	rs6444027	1	FALSE	FALSE
ENSG00000101189.5	MRGBP	5.72571436235438	1.55518843162768	-	2.36127972145112e-05	FALSE	TRUE	FALSE	FALSE	NA	-	-	0.621	0.513352695288994	0	0.677553058642965	0.204033242666293	0	0.476472882406104	FALSE	FALSE	0.319512144374	0	0.552754224160567	FALSE	0.198221728257849	0.474008602062625	0.333013845512182	1	-0.00157364989424265	-1	1	-0.0209190358235718	-0.124835272124492	0.319001973512512	FALSE	rs2427458	1	FALSE	FALSE
ENSG00000250644.1	NA	140.810900995575	1207.4326299341	+	2.36364600818486e-05	TRUE	FALSE	FALSE	FALSE	NA	+	NA	NA	0	0	0.351289994045966	0	0	0.67621808023137	FALSE	FALSE	0	0	0.567164010256706	FALSE	0.289691580994721	1	1	1	1	1	1	-0.369442742708605	-0.468193392940154	-0.0503200664493014	FALSE	rs11037265	1	FALSE	FALSE
ENSG00000213312.3	RPL7AP34	1.08101765625	0.485659686099464	-	2.36404713656343e-05	FALSE	TRUE	FALSE	FALSE	NA	+	NA	NA	0	0	0.289640351082977	0	0	0	FALSE	FALSE	0	0	0	FALSE	0.145429285912754	-0.00426875267554699	-0.987756962991179	1	-0.513683334555211	-1	1	0.228970523683859	0.138098173599507	0.433628752956015	FALSE	rs3800489	1	FALSE	FALSE
ENSG00000259607.1	NA	4.64002787307033	2.57436655166677	+	2.37686221695641e-05	TRUE	FALSE	FALSE	FALSE	NA	+	NA	NA	0	0	0.2352638208347	0.0691398424184702	0	0.494716946908654	FALSE	FALSE	0	0	0.515542266794353	FALSE	0.405834954153932	1	0.338258272512334	1	1	-0.98207835737349	1	0.323668819940846	0.208837743761546	0.617697704079431	FALSE	rs10087570	1	FALSE	FALSE
ENSG00000143106.8	PSMA5	9.14059690937664	4.01130164452931	-	2.38144488344844e-05	FALSE	TRUE	FALSE	FALSE	NA	+	-	0.0183	0.468906972792068	0	0.762677797056627	0.139298996993745	0	0.736640825412684	FALSE	FALSE	0	0	0.373743867640305	FALSE	0.215282022784107	1	-0.956768763049658	1	-1	-1	0.217037720865047	0.389030421868528	0.279632121182354	0.641269530884621	FALSE	rs4246519	1	FALSE	FALSE
ENSG00000110448.6	CD5	38.4650031152648	138.517519014996	+	2.38203520502603e-05	TRUE	FALSE	FALSE	FALSE	NA	+	-	8.2e-15	0	0	0.705015153267714	0.0853486385503769	0	0.572747715120282	FALSE	FALSE	0	0	0	FALSE	0.690247290914143	0.9998535066153	0.943544973708018	1	0.639214828761923	-0.132201279822014	1	0.686926125132128	0.584613891475892	0.819548282903551	FALSE	rs955017	1	FALSE	FALSE
ENSG00000051620.5	HEBP2	21.3651811840121	26.9758628644832	-	2.38272681357442e-05	FALSE	TRUE	FALSE	FALSE	NA	-	+	2.18e-09	0	0	0.475169798118243	0.161026067129194	0	0.758319713668419	FALSE	FALSE	0	0	0.373649168577833	FALSE	0.480966935259794	1	1	1	1	0.00391415641878551	1	0.0792416829157317	-0.016460283488159	0.630213637015532	FALSE	rs6940908	1	TRUE	FALSE
ENSG00000014919.7	COX15	7.94121866020115	1.48458124343268	+	2.38486263834308e-05	TRUE	FALSE	FALSE	FALSE	NA	+	+	0.00296	0	0	0.587500037981252	0.638494152348749	0.282816633708029	0.803951784026984	FALSE	FALSE	0.206322827475103	0	0.614666926362011	FALSE	0.202945262572937	1	1	1	-1	-1	1	-0.123456169318291	-0.230521609804175	0.124723279764209	FALSE	rs12766044	1	FALSE	FALSE
ENSG00000101337.11	TM9SF4	14.8412931569681	6.66664438680658	+	2.38835664474136e-05	TRUE	FALSE	FALSE	FALSE	NA	+	-	0.793	0	0	0.544317608446996	0	0	0.304764562509245	FALSE	FALSE	0	0	0.703894506973204	FALSE	0.391497638232843	0.90060235133032	0.401643513921591	1	0.773785944833996	0.535338452021899	1	-0.148915701331779	-0.25175317343418	0.282548313562195	FALSE	rs2424957	1	FALSE	FALSE
ENSG00000107742.7	SPOCK2	74.0561007092739	368.989520799142	+	2.40055492455617e-05	TRUE	FALSE	FALSE	FALSE	NA	+	-	4.62e-31	0	0	0.587339214314512	0	0	0.52978049362715	FALSE	FALSE	0	0	0.39956775748828	FALSE	0.621172547929981	0.980769336296337	0.893801193424647	1	0.722985732143808	0.552921385764904	1	0.544458780723001	0.44394078168116	0.703534539535992	FALSE	rs10999801	1	FALSE	FALSE
ENSG00000239713.3	APOBEC3G	11.6660967741935	11.3480989920399	-	2.41947018926971e-05	FALSE	TRUE	FALSE	FALSE	NA	+	+	1.34e-21	0.624493232936289	0	0.785381117999771	0.392756701816611	0	0.757892414567647	FALSE	FALSE	0.157970347196186	0	0.418537995039305	FALSE	0.858849680466796	1	0.954497096446719	1	1	0.00253975627347642	1	0.420034489302846	0.300519537989193	0.780220404251503	FALSE	rs9611202	0.976781980059769	TRUE	FALSE
ENSG00000068308.9	OTUD5	48.4055097167822	54.8044861517766	+	2.43973044512832e-05	TRUE	FALSE	FALSE	FALSE	NA	+	-	0.838	0.341448153429986	0	0.62666346517884	0.0809657913421977	0	0.680991262034395	FALSE	FALSE	0	0	0.442641600936071	FALSE	0.476021116976938	1	1	1	-1	-1	1	0.292888576946892	0.203226776991534	0.615002307034345	FALSE	NA	NA	FALSE	FALSE
ENSG00000260570.1	NA	27.379	64.5958474271168	+	2.4772723512529e-05	TRUE	FALSE	FALSE	FALSE	NA	+	NA	NA	0.433506679029874	0	0.59685019034918	0.290141603053751	0	0.547826182863501	FALSE	FALSE	0.576361245323201	0.149146535502791	0.756136101236267	TRUE	0.366268407891081	-0.168520781739395	-1	1	1	0.000356274087293904	1	0.525362583739078	0.439123219545	0.775380341313964	FALSE	rs7192498	1	FALSE	FALSE
ENSG00000176407.12	KCMF1	12.3706930109582	2.37926382155815	-	2.48571431436272e-05	FALSE	TRUE	FALSE	FALSE	NA	-	+	2.39e-05	0.125419422612448	0	0.632908935108141	0	0	0.636229355690737	FALSE	FALSE	0	0	0.614600317805127	FALSE	0.0829674909697138	1	0.473801039111278	1	-0.661714905138145	-1	1	-0.0554751758878479	-0.162344695980299	0.29897740009432	FALSE	rs11674417	1	FALSE	FALSE
ENSG00000166224.12	SGPL1	7.09389611378205	1.3826513618299	+	2.49949106648154e-05	TRUE	FALSE	FALSE	FALSE	NA	+	+	3.35e-12	0.153912096045493	0	0.631790046481433	0.416480729078497	0	0.791472001333816	FALSE	FALSE	0	0	0.648857876993484	FALSE	0.0491247568769103	0.910569650018844	0.184207347143757	1	-0.311513236795427	-1	1	0.15330707621324	0.0187249619208047	0.650792915020692	FALSE	rs7919449	1	TRUE	FALSE
ENSG00000204387.8	C6orf48	21.9974587988827	41.0240841715496	-	2.51006771709311e-05	FALSE	TRUE	FALSE	FALSE	NA	-	-	1.35e-28	0.746924004840366	0.422280490959423	0.863464201815597	0	0	0.429501346477851	FALSE	TRUE	0.029113352818714	0	0.576253526864739	FALSE	0.144762434009447	-0.000183430502462589	-0.916000131675665	1	-1	-1	1	0.179786738417454	0.0157814639027393	0.475780329282663	FALSE	rs114460993	1	FALSE	FALSE
ENSG00000164346.5	NSA2	13.7914037364518	29.147740587904	-	2.53392792449908e-05	FALSE	TRUE	FALSE	FALSE	NA	-	NA	NA	0.827054669819231	0.43102005348544	0.937278905645035	0	0	0.656998920782706	FALSE	TRUE	0.543997695712938	0	0.788351919207786	FALSE	0.307918866351764	1	0.460140300702029	1	0.181523186663211	-1	1	0.111153520307307	-0.0161282286428404	0.489722794808085	FALSE	rs392344	1	FALSE	FALSE
ENSG00000123338.8	NCKAP1L	28.7490576539566	29.0691999005417	+	2.54976905744938e-05	TRUE	FALSE	FALSE	FALSE	NA	+	+	9.16e-07	0	0	0.260855035683744	0.244150188708351	0	0.799215234651292	FALSE	FALSE	0	0	0	FALSE	0.368991386496249	1	1	1	0.177039381126013	-0.0619534259693177	1	-0.20655185159478	-0.32970897807673	0.0694091672817608	FALSE	rs7310681	1	FALSE	FALSE
ENSG00000074201.3	CLNS1A	5.04363340474621	1.73045472178449	-	2.55720180364363e-05	FALSE	TRUE	FALSE	FALSE	NA	-	-	9.28e-10	0.56833618888402	0	0.724768258338339	0	0	0.477941368522155	FALSE	FALSE	0.265148965858571	0	0.524656976764958	FALSE	0.197610447346485	-0.310962991195201	-1	1	0.000772706582247937	-0.724522715945123	1	0.105519249466645	-0.0340439145365707	0.374196639903293	FALSE	rs10899283	1	FALSE	FALSE
ENSG00000157837.11	SPPL3	5.89340829702524	0.48727759911925	+	2.55834191191872e-05	TRUE	FALSE	FALSE	FALSE	NA	+	-	0.00111	0	0	0.591005637876195	0.414244461315802	0	0.772032251979491	FALSE	FALSE	0	0	0.525024972598174	FALSE	0.239955543206446	1	-0.97750845689736	1	-1	-1	0.688795471348597	0.157785054137649	0.00348294783196956	0.41274076326282	FALSE	rs60858026	1	FALSE	FALSE
ENSG00000185608.4	MRPL40	2.48409720805711	0.649518479961057	-	2.56747709485745e-05	FALSE	TRUE	FALSE	FALSE	NA	+	-	0.296	0.628988010536934	0.326935279392938	0.78615688738552	0	0	0.172802962271227	FALSE	TRUE	0.661863800205398	0.03523403015221	0.883054433473606	TRUE	0.108641289247013	-1	-1	-0.504020689083701	-1	-1	1	0.623366878518249	0.543756060128027	0.831514146781797	TRUE	rs458480	1	FALSE	FALSE
ENSG00000197943.5	PLCG2	19.1605862674095	12.8420326646691	+	2.59697401738649e-05	TRUE	FALSE	FALSE	FALSE	NA	+	+	0.00304	0.574151765210618	0.0959739656309221	0.764317884460787	0.239800910136939	0	0.575201636310142	FALSE	FALSE	0	0	0.230738483847833	FALSE	0.464906918588497	1	1	1	-7.25124110105729e-06	-0.000423838166493125	1	-0.00300023278636539	-0.203877743181259	0.33154708655313	FALSE	rs74248292	1	FALSE	FALSE
ENSG00000234431.2	NA	75.0231289503386	389.210915369462	+	2.59877604883189e-05	TRUE	FALSE	FALSE	FALSE	NA	-	NA	NA	0.519659065483301	0	0.737598304520036	0	0	0.27534694435332	FALSE	FALSE	0	0	0.0458329896675975	FALSE	0.54081689358155	1	1	1	1	-0.0038256813567767	1	0.0133505269542177	-0.0876540568403363	0.325643139526992	FALSE	rs74318575	1	TRUE	FALSE
ENSG00000101052.8	IFT52	3.95198768302335	0.596845434175032	-	2.61089800391129e-05	FALSE	TRUE	FALSE	FALSE	NA	+	-	0.565	0.355103087591577	0	0.67828976684065	0	0	0.269723349052219	FALSE	FALSE	0	0	0.606933264922613	FALSE	0.278521811614337	1	-1	1	-0.000301244697306406	-0.902992061199583	1	0.0439280582038276	-0.0457876511289437	0.490982423535235	FALSE	rs6103683	1	FALSE	FALSE
ENSG00000231025.1	NA	3.99257584069535	0.514866013385239	+	2.6246853363209e-05	TRUE	FALSE	FALSE	FALSE	NA	+	NA	NA	0.279369005621639	0	0.568922002557262	0.316949795678232	0	0.662459747408145	FALSE	FALSE	0.307126655384831	0	0.74461088099393	FALSE	0.229063628785774	-0.321250251894792	-1	1	-0.00253301668419161	-1	1	0.561249141330668	0.467439308629032	0.73972458018776	FALSE	rs116188240	1	FALSE	FALSE
ENSG00000189376.7	C8orf76	4.3375412601626	0.887122612271589	-	2.63934813333196e-05	FALSE	TRUE	FALSE	FALSE	NA	-	NA	NA	0.134858515394888	0	0.586543195373458	0.000742058378086891	0	0.720686046822722	FALSE	FALSE	0	0	0.622066629627027	FALSE	-0.0354542928591275	-0.947538694437127	-0.9970722836166	1	-0.606840053637789	-1	0.0554328397293484	0.254117911118321	0.0750779537323532	0.476444993059142	FALSE	rs57467627	0.548449371881711	TRUE	FALSE
ENSG00000198231.7	DDX42	13.9991169240864	9.20182206697292	+	2.68998843921644e-05	TRUE	FALSE	FALSE	FALSE	NA	+	-	1.76e-08	0.161004790242671	0	0.731282656056435	0.0797044323771896	0	0.53849911906936	FALSE	FALSE	0.132072861044603	0	0.723159009354573	FALSE	0.263295359822173	0.55292309251723	-1	1	-0.0784831955750098	-1	1	0.344574572207602	0.264322225917998	0.593642110289039	FALSE	rs16946625	1	FALSE	FALSE
ENSG00000123131.8	PRDX4	3.46562288806758	1.99235054446197	-	2.69861758189688e-05	FALSE	TRUE	FALSE	FALSE	NA	-	+	0.000449	0.31014514864972	0	0.726618145854596	0	0	0.58006297749126	FALSE	FALSE	0.256962341720835	0	0.546683106672225	FALSE	0.245234787440956	0.810833944818474	-1	1	1	0.00104574951253862	1	0.124998758093761	-0.0500521623981824	0.490189166514392	FALSE	NA	NA	FALSE	FALSE
ENSG00000161920.5	MED11	11.0797435549525	4.21995243143082	-	2.73309492658883e-05	FALSE	TRUE	FALSE	FALSE	NA	+	-	0.921	0	0	0.650150414252818	0	0	0.580805225964664	FALSE	FALSE	0	0	0.48400803002979	FALSE	0.110975270908586	-1	-1	1	0.486461505726585	0.0402358027891483	1	0.0448445930350108	-0.157627910004464	0.379501318103158	FALSE	rs74550041	0.232513350331457	TRUE	FALSE
ENSG00000173039.13	RELA	26.8431331317574	14.8298318451151	+	2.75691621332514e-05	TRUE	FALSE	FALSE	FALSE	NA	+	+	0.679	0	0	0.543404445272414	0	0	0.723908130709969	FALSE	FALSE	0	0	0.30749236936863	FALSE	0.513976104473465	0.980438131822762	0.974439058833483	1	0.759280075898226	0.00949364122218316	1	0.260173925524644	0.112967830619465	0.421790111679469	FALSE	rs527962	1	FALSE	FALSE
ENSG00000167674.10	NA	10.3670602886406	2.99636841967837	+	2.81898684694625e-05	TRUE	FALSE	FALSE	FALSE	NA	+	+	0.519	0	0	0.440177379325779	0	0	0.0264358399111974	FALSE	FALSE	0	0	0.513034761778063	FALSE	0.335926646290636	0.992521413353091	0.561546980201868	1	1	0.00408242509257703	1	0.310023204789979	0.203105311748372	0.506267641925108	FALSE	rs624300	1	FALSE	FALSE
ENSG00000137547.4	MRPL15	5.44244097807757	3.06786014974325	-	2.82656831024645e-05	FALSE	TRUE	FALSE	FALSE	NA	-	+	0.0894	0.231339893402232	0	0.691885897457372	0	0	0.12533484458299	FALSE	FALSE	0	0	0.596400530556866	FALSE	0.379049736037788	1	-0.98240571325441	1	0.00065622698101651	-0.000758744942505465	1	0.0858310446294718	-0.0690612885562124	0.430867050701592	FALSE	rs112000009	1	FALSE	FALSE
ENSG00000183576.8	SETD3	5.83168627735813	0.863993980989481	-	2.84708029781896e-05	FALSE	TRUE	FALSE	FALSE	NA	-	-	0.0727	0.242215660178675	0	0.696400400732577	0.369751921239984	0	0.568151147130126	FALSE	FALSE	0.447891874313912	0	0.649936694293907	FALSE	0.213948318977494	0.19974203420463	0.00538450898064409	1	-0.000618734399517479	-1	1	0.237237563085584	0.0860742175380433	0.509011952404214	FALSE	rs2016624	1	FALSE	FALSE
ENSG00000153551.9	CMTM7	22.6987759012016	9.2769849397264	-	2.84931493794378e-05	FALSE	TRUE	FALSE	FALSE	NA	-	-	0.0619	0.292177195468389	0	0.72889172117189	0.238804848547528	0	0.784046638263636	FALSE	FALSE	0.426047700672639	0	0.783146723847503	FALSE	0.479466518477355	0.937701326058804	0.574019753489957	1	0.310370663000956	0.00107842476816996	1	0.271138246511321	0.147714758612874	0.578676214155385	FALSE	rs78865523	1	FALSE	FALSE
ENSG00000088812.13	ATRN	1.88381103118193	0.237900214842229	+	2.86216986616009e-05	TRUE	FALSE	FALSE	FALSE	NA	+	+	0.094	0	0	0.536516798882148	0.152391716166614	0	0.583231790727728	FALSE	FALSE	0	0	0.492418977261448	FALSE	0.166935259794387	0.735373827359785	-0.515647858810945	1	0.530187087955181	0.13219755423105	1	-0.0728612147239029	-0.148480780311608	0.492899903513604	FALSE	rs3892508	0.548790913064182	TRUE	FALSE
ENSG00000105953.10	OGDH	28.7206964113448	29.6662760060992	+	2.86309213355192e-05	TRUE	FALSE	FALSE	FALSE	NA	+	+	1.92e-11	0	0	0.558442152406415	0	0	0.771775567492355	FALSE	FALSE	0	0	0.210670738246112	FALSE	0.535815504306752	0.92446387265139	0.899683445468933	1	0.780688399546424	0.428921935755172	1	0.269782313706993	0.204319649480955	0.473047737270483	FALSE	rs77485495	1	FALSE	FALSE
ENSG00000115970.13	THADA	2.42114029628331	0.183137756984931	+	2.90729525786704e-05	TRUE	FALSE	FALSE	FALSE	NA	+	-	0.00553	0	0	0.546730709066665	0	0	0.449892884958763	FALSE	FALSE	0	0	0.161022054133496	FALSE	0.509141428174493	0.953966505865596	0.876526566968449	1	1	0.00821163733770576	1	0.394214034048668	0.297862280016745	0.651342850972264	FALSE	rs6761677	1	FALSE	FALSE
ENSG00000162408.10	NOL9	5.98462057066337	1.98470130775499	+	2.91045049482177e-05	TRUE	FALSE	FALSE	FALSE	NA	+	-	3.73e-09	0.101265743335011	0	0.530784720796146	0.153539846521164	0	0.58338912911667	FALSE	FALSE	0.0927498014653443	0	0.601156881523412	FALSE	0.668963601000278	0.982287484727274	0.708883939552185	1	0.814660823944159	0.00518117393547551	1	0.465466122207331	0.37619594021713	0.766236462145512	FALSE	rs1725271	1	FALSE	FALSE
ENSG00000138640.10	FAM13A	3.77691707845522	0.541579167784701	+	2.91801653343544e-05	TRUE	FALSE	FALSE	FALSE	NA	+	+	6.31e-22	0.462335062600888	0	0.876385431739462	0.409670927471797	0	0.837463516647796	FALSE	FALSE	0.40109408870907	0	0.684932405189836	FALSE	0.668407891080856	0.786826306633099	0.750355340718408	1	1	0.00191298857195868	1	0.0611132542842249	-0.0804801666618162	0.612692059731838	FALSE	rs34693890	1	FALSE	FALSE
ENSG00000173113.2	TRMT112	33.9602286791872	62.1868812008736	-	2.91990200002348e-05	FALSE	TRUE	FALSE	FALSE	NA	-	-	5.9e-09	0.563278153907332	0	0.702176371790234	0	0	0.418139726685235	FALSE	FALSE	0.236876793969958	0	0.76882611075859	FALSE	0.236954709641567	-1	-1	1	1	-1	1	0.313887608458778	0.209624366961678	0.593517229418381	FALSE	rs1706936	1	FALSE	FALSE
ENSG00000143543.10	JTB	68.7782994302949	168.901459717252	-	2.92171509786875e-05	FALSE	TRUE	FALSE	FALSE	NA	-	+	0.00157	0.222950569845992	0	0.694618253027955	0	0	0.347301352323486	FALSE	FALSE	0	0	0.136791889396024	FALSE	0.0347874409558211	1	-0.588162997646651	1	-0.0620487760036641	-0.329484696844763	1	-0.0450761175866133	-0.208774077863103	0.249760000264116	FALSE	rs10888541	0.960973585590445	TRUE	FALSE
ENSG00000137275.8	RIPK1	15.2877886499885	5.50432654385577	+	3.00861715733173e-05	TRUE	FALSE	FALSE	FALSE	NA	+	+	0.0083	0.329838542346728	0	0.748167178937066	0.264908317262344	0	0.721364499548487	FALSE	FALSE	0	0	0.406636244962763	FALSE	0.422228396776883	1	1	1	0.142403326189802	-1	1	0.203122336410567	0.096749824555518	0.464455784728612	FALSE	rs35286885	1	FALSE	FALSE
ENSG00000124228.10	DDX27	10.7788874605532	3.9206467554671	+	3.01079184555331e-05	TRUE	FALSE	FALSE	FALSE	NA	+	-	0.0115	0	0	0.563050792416095	0	0	0.377769273696763	FALSE	FALSE	0	0	0.62871920886822	FALSE	0.543984440122256	-1	-1	1	0.79219043062844	-0.00162571367812847	1	0.649141531885269	0.578192652365673	0.807057438349989	FALSE	rs36082095	1	FALSE	FALSE
ENSG00000114867.14	EIF4G1	18.751818963422	17.1911081717779	+	3.04314369955102e-05	TRUE	FALSE	FALSE	FALSE	NA	+	-	0.129	0	0	0.284100092306421	0	0	0.685640480426362	FALSE	FALSE	0	0	0.199208661467393	FALSE	0.335871075298694	1	0.102580569882525	1	0.237483723037916	-1	1	0.220575853926601	0.101384088719396	0.580389516484918	FALSE	rs73174034	1	FALSE	FALSE
ENSG00000168610.10	STAT3	50.9618109254992	95.2910569593307	+	3.0933657583405e-05	TRUE	FALSE	FALSE	FALSE	NA	+	+	2.95e-08	0.704405352450871	0.455357483985307	0.842657867780979	0	0	0.312587766975718	FALSE	TRUE	0	0	0.498122792110547	FALSE	0.342761878299528	1	0.000837055185498592	1	-1	-1	0.590244719133908	0.213968957108016	0.0578161316275021	0.445478547945659	FALSE	rs4796712	1	FALSE	FALSE
ENSG00000140632.12	GLYR1	28.3498176462498	13.2488317881091	+	3.10053751022017e-05	TRUE	FALSE	FALSE	FALSE	NA	+	+	0.101	0	0	0.665909587195418	0.396689931359741	0	0.803214017297299	FALSE	FALSE	0	0	0.247980905609889	FALSE	0.387885523756599	1	1	1	1	0.727444500304278	1	0.160936808303061	0.0375441752725139	0.41689534448589	FALSE	rs1256768	1	FALSE	FALSE
ENSG00000237765.2	FAM200B	2.76490414588529	0.829412555543086	-	3.12802962106753e-05	FALSE	TRUE	FALSE	FALSE	NA	-	NA	NA	0	0	0.432500825754544	0.147518278735297	0	0.488294957372044	FALSE	FALSE	0	0	0.531797626360106	FALSE	0.405946096137816	-1	-1	1	0.364376074899093	-1	1	0.569651134263613	0.489160118882825	0.82338991791322	FALSE	rs12644180	1	FALSE	FALSE
ENSG00000143379.8	SETDB1	10.5647351380042	3.00044910710527	+	3.1412110002695e-05	TRUE	FALSE	FALSE	FALSE	NA	+	+	0.499	0	0	0.383345043203404	0	0	0.54790558512869	FALSE	FALSE	0	0	0.455299318843017	FALSE	0.379827729924979	1	0.86646956122737	1	0.553057055085181	0.00157158587766996	1	0.0165465948648762	-0.109559276716065	0.332582397181013	FALSE	rs77604525	1	FALSE	FALSE
ENSG00000164032.7	H2AFZ	34.2157238814075	53.5349736769486	-	3.15894011434475e-05	FALSE	TRUE	FALSE	FALSE	NA	-	+	0.00409	0	0	0.272784002754564	0	0	0.294681549536722	FALSE	FALSE	0	0	0.044741439441931	FALSE	0.0496248958043901	1	0.999829616550768	1	0.0771859452954052	-0.281379297804977	0.938458492868727	-0.214350327932125	-0.323555269176684	0.0985671919111005	FALSE	rs17635262	1	FALSE	FALSE
ENSG00000115233.7	PSMD14	0.927566419463961	0.062818630174336	-	3.18309108913843e-05	FALSE	TRUE	FALSE	FALSE	NA	-	-	0.00756	0.0875188051647133	0	0.610310114413505	0	0	0.553119375913871	FALSE	FALSE	0	0	0.479325238267896	FALSE	0.152042233953876	1	-0.999949632554465	1	-0.644421881625726	-1	1	0.159231047337955	0.0588493965125061	0.436474842425808	FALSE	rs1267033	1	FALSE	FALSE
ENSG00000089063.10	TMEM230	19.4334988927165	25.9317937998844	-	3.19942447659263e-05	FALSE	TRUE	FALSE	FALSE	NA	-	-	3.79e-07	0.759882218862009	0.473972790155622	0.89968703383735	0	0	0.509491092852559	FALSE	TRUE	0.324096456460431	0	0.640439119219366	FALSE	0.196665740483468	1	0.19212682872154	1	1	-0.518710314574975	1	0.0851427542439499	-0.0789764424280642	0.366075690005696	FALSE	rs236111	0.955667229483182	TRUE	FALSE
ENSG00000268790.1	NA	9.24024447278912	3.45798196469123	-	3.2407979053217e-05	FALSE	TRUE	FALSE	FALSE	NA	-	NA	NA	0.673147964428958	0	0.874087367130858	0	0	0.392175887106398	FALSE	FALSE	0.469354819779007	0	0.637103988333748	FALSE	0.380939149763823	0.993985749988366	-0.23345280889366	1	1	0.00254759073052453	1	0.109382707889812	0.00844770229472075	0.286220008935984	FALSE	rs1130222	1	FALSE	FALSE
ENSG00000233846.2	NA	3.03658641975309	2.74070533186653	-	3.24147635794256e-05	FALSE	TRUE	FALSE	FALSE	NA	-	NA	NA	0	0	0.480713217855074	0.0440008425257682	0	0.452678296322615	FALSE	FALSE	0	0	0.26328118870431	FALSE	0.25012503473187	1	NA	NA	-1	NA	NA	0.0667448263156361	NA	NA	FALSE	rs1658959	1	FALSE	FALSE
ENSG00000215712.4	TMEM242	1.84330703463203	0.240916925075345	-	3.29761961294055e-05	FALSE	TRUE	FALSE	FALSE	NA	-	NA	NA	0.36060406991814	0	0.684073693335862	0	0	0.0382129692986525	FALSE	FALSE	0.144686525920457	0	0.459273307941042	FALSE	0.159210891914421	1	-1	1	0.000694437370532736	-0.000243983258704718	1	0.0118035788011008	-0.110839017470408	0.352684784003928	FALSE	rs2151884	1	FALSE	FALSE
ENSG00000198860.7	TSEN15	3.6622881773399	2.1082305217413	-	3.3049568253754e-05	FALSE	TRUE	FALSE	FALSE	NA	-	-	8.89e-06	0.219308442163774	0	0.728441266510823	0.065418235220158	0	0.522556790318887	FALSE	FALSE	0	0	0.281055233745947	FALSE	0.168213392609058	1	1	1	-0.0499348498759519	-1	1	-0.179962696328573	-0.302343955659893	0.173298336519569	FALSE	rs2500117	1	FALSE	FALSE
ENSG00000196636.7	SDHAF3	1.64435836233145	0.462505514724486	-	3.31214772503093e-05	FALSE	TRUE	FALSE	FALSE	NA	-	-	0.000151	0.563371159473427	0	0.739396954548023	0	0	0.590063628609936	FALSE	FALSE	0	0	0.577689239626782	FALSE	0.0811892192275632	0.518516751825876	0.335754266949438	1	-0.00247178945013158	-0.0150707056254066	1	-0.393622681149519	-0.488663689964774	-0.0658377580468415	FALSE	rs4729357	1	FALSE	FALSE
ENSG00000058668.10	ATP2B4	10.8778867807795	8.70504822067749	+	3.31595721076276e-05	TRUE	FALSE	FALSE	FALSE	NA	-	+	3.19e-31	0.41232519913955	0	0.698623436231673	0	0	0.639074620018046	FALSE	FALSE	0.657010516994396	0.0781631104677366	0.89159326480614	TRUE	0.353209224784662	-1	-1	1	1	0.385644711120699	1	0.564761484084201	0.377845336100661	0.829523114156146	FALSE	rs1977812	1	FALSE	FALSE
ENSG00000109320.7	NFKB1	14.9503671335688	9.89686593926217	+	3.31922826201123e-05	TRUE	FALSE	FALSE	FALSE	NA	-	-	4.66e-16	0	0	0.687665408398174	0	0	0.160968365336298	FALSE	FALSE	0	0	0.482637849590261	FALSE	0.527424284523479	0.228506478096156	-0.00770857446816349	1	0.584131207938702	0.524101933651617	1	0.121804638196344	0.028260080696311	0.426253010868564	FALSE	rs7674004	1	FALSE	FALSE
ENSG00000112110.5	MRPL18	10.2113125	4.43999255786419	-	3.34540832113904e-05	FALSE	TRUE	FALSE	FALSE	NA	-	-	0.00122	0.041912181863534	0	0.462810770257809	0.496203130119437	0	0.722567562639486	FALSE	FALSE	0.356366672563772	0	0.643728758011989	FALSE	0.160822450680745	-0.540713557001278	-1	1	-1	-1	1	0.359216243458376	0.216917167646542	0.593506746653934	FALSE	rs240868	1	FALSE	FALSE
ENSG00000250317.4	SMIM20	2.61331914697193	1.3813921871657	-	3.36471985331124e-05	FALSE	TRUE	FALSE	FALSE	NA	-	NA	NA	0.75084432270305	0.382101350018439	0.841023949076067	0	0	0.467626831010954	FALSE	TRUE	0	0	0.752431991156137	FALSE	0.186329535982217	-0.98509444986348	-1	1	-1	-1	1	0.223056148318932	0.101220078527782	0.49405565635198	FALSE	rs11736949	1	FALSE	FALSE
ENSG00000256950.1	NA	9.02862952947539	3.08635600617456	-	3.36819286403668e-05	FALSE	TRUE	FALSE	FALSE	NA	-	NA	NA	0.217101362709379	0	0.521395868256165	0	0	0.539439360793385	FALSE	FALSE	0	0	0.522618486008272	FALSE	0.356876910252848	1	-0.993873174466072	1	-1	-1	1	0.24086362486259	0.0232185085816571	0.514880293783212	FALSE	rs2922797	1	FALSE	FALSE
ENSG00000267379.1	NA	101.8430305	905.525738564673	+	3.38291815847888e-05	TRUE	FALSE	FALSE	FALSE	NA	+	NA	NA	0.77533207758927	0.428309236905493	0.927079542029647	0.108733790216649	0	0.624904582918351	FALSE	TRUE	0.0345166021133386	0	0.596433408418663	FALSE	0.380494581828286	1	0.208956125357234	1	-1	-1	1	0.30365359975167	0.0310641131419472	0.603361745879246	FALSE	rs7251278	1	TRUE	FALSE
ENSG00000103429.6	BFAR	6.88118921467764	1.38579971148503	-	3.40997166000309e-05	FALSE	TRUE	FALSE	FALSE	NA	+	-	0.0183	0.296849634099046	0	0.532820543501109	0	0	0.309524561007652	FALSE	FALSE	0	0	0.348322409827089	FALSE	0.350263962211726	1	0.999999925455526	1	0.00501794912335796	0.00387376228063492	1	-0.0148722106781767	-0.131650564442014	0.178679691534263	FALSE	rs11075236	1	FALSE	FALSE
ENSG00000167664.4	TMIGD2	10.4243941925219	14.0621061890092	-	3.41007118730323e-05	FALSE	TRUE	FALSE	FALSE	NA	-	NA	NA	0.775151930038526	0.484054442214399	0.847657109314873	0.118654173773699	0	0.610241939251489	FALSE	TRUE	0	0	0.273204245874341	FALSE	0.568713531536538	1	1	1	-1	-1	1	0.309947972222431	0.193196830500258	0.597169896294415	FALSE	rs72620526	1	FALSE	FALSE
ENSG00000171863.8	RPS7	2.15921998745744	1.78814397705727	-	3.4547686634678e-05	FALSE	TRUE	FALSE	FALSE	NA	+	NA	NA	0.457344041782444	0	0.715477968872814	0	0	0.593967735078919	FALSE	FALSE	0	0	0.604745824517841	FALSE	0.420672409002501	1	-0.628937744411819	1	1	-0.124627489279451	1	0.115396076910473	-0.0254832253212842	0.513289924888277	FALSE	rs1551128	1	FALSE	FALSE
ENSG00000115165.5	CYTIP	52.1094636802915	63.0113962602425	-	3.47109995049303e-05	FALSE	TRUE	FALSE	FALSE	NA	-	NA	NA	0.480843269547348	0	0.755632984769642	0.0521683618027536	0	0.699794567621507	FALSE	FALSE	0.512432593564685	0	0.868593331906793	FALSE	0.449347040844679	0.504539557582261	0.130319524905286	1	0.483192569855208	0.201706728248177	1	0.516513334289248	0.404270606710238	0.831073987330767	FALSE	rs7560781	1	FALSE	FALSE
ENSG00000198408.7	MGEA5	34.2829202017662	89.3358290031529	+	3.50759728624918e-05	TRUE	FALSE	FALSE	FALSE	NA	-	-	9.15e-05	0	0	0.526101720360304	0.701940873063508	0.210120584424735	0.858068286071352	TRUE	FALSE	0	0	0.63041494007688	FALSE	0.0435120866907474	1	0.623982641140748	1	-1	-1	1	-0.0517616279178611	-0.177010329699552	0.269106950734707	FALSE	rs77406722	1	FALSE	FALSE
ENSG00000064601.11	CTSA	58.4077652401478	116.58806769112	+	3.51464234589046e-05	TRUE	FALSE	FALSE	FALSE	NA	-	+	9.9e-06	0	0	0.217423291396712	0	0	0.707374801530123	FALSE	FALSE	0	0	0	FALSE	0.492136704640178	1	0.999939915873237	1	0.879246823189804	0.212464347120159	1	0.0730454610793037	-0.150225685651248	0.365562090542039	FALSE	rs73301759	1	FALSE	FALSE
ENSG00000134899.13	ERCC5	10.2350590356442	4.6777489847885	+	3.53076086028841e-05	TRUE	FALSE	FALSE	FALSE	NA	+	-	6.58e-08	0.347486610325707	0	0.60978119721948	0	0	0.485371030607769	FALSE	FALSE	0	0	0.388947402009268	FALSE	0.342372881355932	-1	-1	1	1	-1	1	0.448780501310627	0.362984337876838	0.596092053416847	FALSE	rs4619255	1	TRUE	FALSE
ENSG00000227615.1	NA	75.6334227386935	1656.39053771225	-	3.55884921524216e-05	FALSE	TRUE	FALSE	FALSE	NA	-	NA	NA	0.365941321561433	0	0.759309210082352	0	0	0.253640441516229	FALSE	FALSE	0	0	0	FALSE	-0.0163934426229508	1	-0.108508811873429	1	-1	-1	0.0956378719439202	-0.129143750975512	-0.391360234200879	0.251337971520959	FALSE	rs604692	1	FALSE	FALSE
ENSG00000260336.1	NA	24.1973154336735	19.0312631204436	+	3.56130710020566e-05	TRUE	FALSE	FALSE	FALSE	NA	+	NA	NA	0.449210233479316	0	0.80754532033015	0.234332948246523	0	0.565961904986066	FALSE	FALSE	0	0	0.259308541590158	FALSE	0.499694359544318	1	0.933343439012676	1	1	0.00549455940369992	1	0.189823141158422	-0.021515817346256	0.478758497623657	FALSE	rs10267628	1	FALSE	FALSE
ENSG00000180329.9	CCDC43	2.32430631548312	0.550953421937119	-	3.62992346670651e-05	FALSE	TRUE	FALSE	FALSE	NA	-	-	0.97	0	0	0.585499899338986	0	0	0.698575147014385	FALSE	FALSE	0	0	0.315255135578614	FALSE	0.363267574326202	1	-0.87058538134671	1	-1	-1	1	0.362855551426959	0.28042010417332	0.605914752356999	FALSE	rs713101	1	FALSE	FALSE
ENSG00000067596.5	DHX8	13.477239670399	4.80595331723227	+	3.6406678766522e-05	TRUE	FALSE	FALSE	FALSE	NA	+	+	0.0363	0.0140894482089357	0	0.565444265459035	0	0	0.70836508052032	FALSE	FALSE	0	0	0.290986770898586	FALSE	0.379105307029731	1	0.916498315036531	1	0.61327041856255	0.367608079706585	1	-0.0766218903916946	-0.249453608919987	0.114177420794181	FALSE	rs918242	1	FALSE	FALSE
ENSG00000073803.9	MAP3K13	0.539599603332011	0.0225770946418869	-	3.64634474993471e-05	FALSE	TRUE	FALSE	FALSE	NA	+	NA	NA	0.25396235962375	0	0.590490464891314	0.282085522933944	0	0.564166824940335	FALSE	FALSE	0.0323275290921959	0	0.319319694390089	FALSE	0.400889135871075	1	0.781250940930414	1	-0.112370826341011	-0.00489989246199604	1	0.246729173168483	0.176644909454669	0.539678032692443	FALSE	rs34532668	1	FALSE	FALSE
ENSG00000029534.15	ANK1	1.36237504844492	0.619852724320812	+	3.65749144085597e-05	TRUE	FALSE	FALSE	FALSE	NA	-	-	0.942	0.486987333948128	0.231380017142513	0.726931485553728	0.59991748104547	0.0387565673316916	0.774744455084521	FALSE	FALSE	0	0	0	FALSE	0.54231731036399	1	1	1	-1	-1	1	0.653917053886406	0.426312138523409	0.787615517405421	FALSE	rs13266712	1	FALSE	FALSE
ENSG00000204568.6	MRPS18B	16.3333260754116	10.7068742752818	-	3.6815426229929e-05	FALSE	TRUE	FALSE	FALSE	NA	-	-	9.41e-08	0.284642677942411	0	0.480260673332439	0	0	0.182484409119202	FALSE	FALSE	0.502552490412746	0	0.720968523371076	FALSE	0.59622117254793	-0.143789562157658	-1	1	1	-0.622041337722598	1	0.584839482269853	0.519500919389135	0.75737085129359	FALSE	rs114460993	1	TRUE	FALSE
ENSG00000108469.10	RECQL5	4.71924249784774	0.928932388748591	+	3.6821483257848e-05	TRUE	FALSE	FALSE	FALSE	NA	+	-	0.475	0	0	0.609657048947608	0	0	0.298348470590288	FALSE	FALSE	0	0	0.143464565410558	FALSE	0.378438455126424	0.981004501942635	0.841558866547716	1	0.603258684759343	0.0092167745248434	1	0.234835772133668	0.0986658460366221	0.454174225084179	FALSE	rs7225150	1	FALSE	FALSE
ENSG00000132005.4	RFX1	9.72743190589965	4.28166978203249	+	3.71545936097773e-05	TRUE	FALSE	FALSE	FALSE	NA	+	+	0.0407	0	0	0.439361072534414	0	0	0	FALSE	FALSE	0	0	0.198454854188924	FALSE	0.371769936093359	1	0.18856434881637	1	-0.792763755304831	-0.186718577428141	1	0.323528700407878	0.175301856703366	0.521159179947808	FALSE	rs7251278	1	FALSE	FALSE
ENSG00000147684.3	NDUFB9	17.2388462051869	21.4585254491954	-	3.72585174644357e-05	FALSE	TRUE	FALSE	FALSE	NA	+	NA	NA	0.67539108927377	0.308177633462806	0.796648355558774	0	0	0.57601020718787	FALSE	TRUE	0.237315332153165	0	0.71725104930652	FALSE	0.238066129480411	1	-0.52533888499134	1	-1	-1	0.0556069100261093	0.348112074176363	0.233075312538394	0.604293574002041	FALSE	rs1529620	1	FALSE	FALSE
ENSG00000113140.6	SPARC	13.7199346783296	73.5586128485321	+	3.75830932251542e-05	TRUE	FALSE	FALSE	FALSE	NA	-	-	0.772	0	0	0.723578942652862	0.54966746268871	0	0.81243496995257	FALSE	FALSE	0.168845778447347	0	0.549957065705372	FALSE	0.460739094192831	1	1	1	1	0.005416355756316	1	0.310357291368215	-0.0752187975330986	0.644557268283601	FALSE	rs2909954	1	FALSE	FALSE
ENSG00000187239.11	FNBP1	34.0986863454103	39.3491035201216	+	3.75860102533302e-05	TRUE	FALSE	FALSE	FALSE	NA	+	-	7.66e-05	0.00764382466392356	0	0.644989146045059	0	0	0.825625214927223	FALSE	FALSE	0	0	0.343306048283178	FALSE	0.352764656849125	0.283507568624878	-0.900345685677842	1	0.285883498613163	0.0378425595563174	1	0.220657188663853	0.131594251465161	0.511837338365806	FALSE	rs10988209	1	FALSE	FALSE
ENSG00000176095.7	IP6K1	27.0559129021383	13.295517378784	+	3.77871325374417e-05	TRUE	FALSE	FALSE	FALSE	NA	-	+	0.000394	0.482288080808089	0.000146876513411466	0.731707953286357	0	0	0.52989175664091	FALSE	FALSE	0	0	0.00415682727530106	FALSE	0.53198110586274	1	1	1	0.00011222467945186	-0.00399360050441849	0.00880980222978396	0.0875800471401962	-0.222175184962218	0.461533861836896	FALSE	rs56347941	1	FALSE	TRUE
ENSG00000150776.13	C11orf57	2.08779586956522	0.583101563117765	-	3.79152481529493e-05	FALSE	TRUE	FALSE	FALSE	NA	-	-	0.267	0.096394641308181	0	0.55380084054649	0	0	0.276198743797964	FALSE	FALSE	0	0	0.367125502180061	FALSE	0.222728535704362	1	NA	NA	0.0787502784364401	NA	NA	-0.0230127323372327	NA	NA	FALSE	rs4547132	1	FALSE	FALSE
ENSG00000102144.9	PGK1	80.8855444896708	103.002241161769	-	3.79316410181183e-05	FALSE	TRUE	FALSE	FALSE	NA	-	NA	NA	0.489471941594505	0.0735625868476379	0.674906382478526	0.435696781224223	0	0.699466953127799	FALSE	FALSE	0	0	0.302191077275492	FALSE	0.344095582106141	1	1	1	-1	-1	-0.000242288561359842	0.0717265134884682	-0.0530127673652464	0.493382529923723	FALSE	NA	NA	FALSE	FALSE
ENSG00000197471.6	SPN	34.3464794409011	79.644358476728	+	3.81261807584289e-05	TRUE	FALSE	FALSE	FALSE	NA	+	+	6.18e-05	0	0	0.625445941275186	0.346882826593948	0	0.66329098049953	FALSE	FALSE	0.427055739339903	0	0.739663792839051	FALSE	0.561933870519589	0.219712112935933	-0.876687014470159	1	1	0.413361190995685	1	0.61038127670227	0.550941350756397	0.823664943560052	FALSE	rs9929088	1	FALSE	FALSE
ENSG00000141577.8	CEP131	3.80199229256534	0.826269744080197	+	3.81439617971081e-05	TRUE	FALSE	FALSE	FALSE	NA	+	NA	NA	0	0	0	0	0	0.487314770534673	FALSE	FALSE	0	0	0	FALSE	0.458016115587663	0.940369905684308	0.992562409372599	1	1	0.00238918207918928	1	0.408964456174754	0.313681233975837	0.56872453870895	FALSE	rs7211504	1	FALSE	FALSE
ENSG00000054611.9	TBC1D22A	13.6100102904996	3.19367577319843	+	3.81570244361567e-05	TRUE	FALSE	FALSE	FALSE	NA	+	+	0.0377	0	0	0.631712057004153	0	0	0.346770881464893	FALSE	FALSE	0	0	0.481804292486045	FALSE	0.613225896082245	1	0.977768671245891	1	1	0.00383953913643215	1	0.395102971159356	0.271270218319374	0.595802496032624	FALSE	rs713711	1	FALSE	FALSE
ENSG00000182973.14	CNOT10	5.19878929996201	0.51290384850386	+	3.84579011807729e-05	TRUE	FALSE	FALSE	FALSE	NA	+	-	0.00325	0	0	0.429512862110467	0	0	0.132346088695424	FALSE	FALSE	0	0	0	FALSE	0.386607390941928	0.904912811780131	0.0342805389754015	1	0.503879295586133	0.116550775900645	1	0.278098419585861	0.200549901608827	0.501477528385239	FALSE	rs13085587	1	FALSE	FALSE
ENSG00000177302.9	TOP3A	13.5503791724618	4.12625897371134	+	3.86334130276375e-05	TRUE	FALSE	FALSE	FALSE	NA	+	+	0.513	0.469817528422278	0	0.825322113497813	0.0210693035139084	0	0.687301827403151	FALSE	FALSE	0	0	0.316631900278093	FALSE	0.388885801611559	1	1	1	-1	-1	1	0.0590023931855187	-0.125144983877452	0.386388443019526	FALSE	rs7222009	1	FALSE	TRUE
ENSG00000249141.1	NA	230.064362753378	4645.95085204257	+	3.89429633126046e-05	TRUE	FALSE	FALSE	FALSE	NA	+	NA	NA	0.443040426189879	0	0.856364618379172	0.51226162906023	0	0.806556200870138	FALSE	FALSE	0	0	0.537683047785637	FALSE	0.805557099194221	1	0.973848207399298	1	-0.192810749604354	0.00540749790350646	1	0.24898314237067	0.214077235116842	0.52191165644032	FALSE	rs9457335	1	FALSE	FALSE
ENSG00000089009.9	RPL6	16.4532605808194	29.82012255206	-	3.90111257344135e-05	FALSE	TRUE	FALSE	FALSE	NA	-	-	5.77e-06	0.684053605795384	0.360128008768039	0.810934540557201	0	0	0.382545475980984	FALSE	TRUE	0.00755300704730055	0	0.615986348766231	FALSE	0.211669908307863	-1	-1	1	-1	-1	0.00127412766167577	0.256619630790345	0.181268687465622	0.511241301070354	FALSE	rs1013556	1	FALSE	TRUE
ENSG00000165699.7	TSC1	4.66194898371928	0.88534480555996	+	3.91997765555126e-05	TRUE	FALSE	FALSE	FALSE	NA	+	-	0.00746	0	0	0.464665417710709	0.387261154089238	0	0.753358026234608	FALSE	FALSE	0	0	0.608649879185303	FALSE	0.10830786329536	1	0.347690354485935	1	1	-1	1	0.272568940017859	0.18228179820725	0.612011831048159	FALSE	rs675713	1	FALSE	FALSE
ENSG00000131473.12	ACLY	17.8754540279763	16.5254649931255	+	3.95219744957034e-05	TRUE	FALSE	FALSE	FALSE	NA	+	+	0.00138	0	0	0.603827344249559	0	0	0.605844482072338	FALSE	FALSE	0.168578947232759	0	0.657114968528239	FALSE	0.298582939705474	-1	-1	1	0.252704667440317	-0.0117214449447566	1	0.221895163077317	0.145003209430419	0.584374756383033	FALSE	rs4796712	1	FALSE	FALSE
ENSG00000248333.3	CDK11B	5.33655776972625	0.791979016162128	+	3.95229565416172e-05	TRUE	FALSE	FALSE	FALSE	NA	+	NA	NA	0	0	0	0	0	0.0420693400761984	FALSE	FALSE	0	0	0	FALSE	0.388996943595443	0.970453096285578	-0.0157602457225971	1	1	-1	1	0.367830072431379	0.3166238254451	0.505676116733668	FALSE	rs12752391	1	FALSE	TRUE
ENSG00000102032.8	RENBP	16.6014995897797	21.265748634955	+	3.96396726839171e-05	TRUE	FALSE	FALSE	FALSE	NA	+	+	0.00407	0.227563330428427	0	0.704254666460033	0.214324539437669	0	0.716557018225693	FALSE	FALSE	0.403391300283394	0	0.784505216584306	FALSE	0.483300916921367	1	0.550339130646746	1	0.84693532251407	0.00574564478624283	1	0.0793207556232041	-0.0475187121179157	0.408527559717984	FALSE	NA	NA	FALSE	FALSE
ENSG00000108846.11	ABCC3	2.28060332713755	1.13054505597055	+	3.98297675824723e-05	TRUE	FALSE	FALSE	FALSE	NA	+	+	8.96e-13	0.0979255905626463	0	0.565311831943921	0.532089316321868	0.0307246266402617	0.829131265688507	FALSE	FALSE	0.29871692331579	0	0.605010162095053	FALSE	0.676521255904418	1	0.986778335707256	1	1	0.00657252616993922	1	0.389188908284011	0.218966186612583	0.748162971989138	FALSE	rs271675	1	FALSE	FALSE
ENSG00000102572.10	STK24	18.3413831711484	7.68186555933719	+	3.98883552983529e-05	TRUE	FALSE	FALSE	FALSE	NA	-	+	0.303	0.699697869518523	0.163315380066862	0.799705874534236	0.549198658315907	0	0.748092801081111	FALSE	FALSE	0	0	0.301664673543018	FALSE	0.397777160322312	1	1	1	-1	-1	0.454951358009454	0.0166768134961929	-0.113804887023733	0.380934594720453	FALSE	rs1289389	1	FALSE	FALSE
ENSG00000180867.9	PDIA3P1	13.3870578764861	8.14942112237851	+	4.03871918432273e-05	TRUE	FALSE	FALSE	FALSE	NA	+	NA	NA	0.0156234743086264	0	0.57341413135621	0.0669561480062246	0	0.643291378264524	FALSE	FALSE	0.35706393082026	0	0.698030189889963	FALSE	0.444456793553765	-0.425437242430685	-1	1	0.342040201574496	0.0034783795708284	1	0.30945665799994	0.26925623287806	0.619269461625107	FALSE	rs881085	1	FALSE	FALSE
ENSG00000229851.1	ARSD-AS1	4.36105282555283	1.80905063340152	+	4.04678473305434e-05	TRUE	FALSE	FALSE	FALSE	NA	+	NA	NA	0.189482876197599	0	0.421885723034718	0	0	0.255746284902519	FALSE	FALSE	0	0	0.346325312442597	FALSE	0.293248124479022	0.934484483815509	-0.97654161699886	1	-0.129065199473911	-1	1	0.295056928483706	0.185712692233561	0.64693187132221	FALSE	NA	NA	FALSE	FALSE
ENSG00000116815.11	CD58	8.07272945976365	10.190932788498	-	4.09727180926375e-05	FALSE	TRUE	FALSE	FALSE	NA	-	+	2.07e-14	0	0	0.475511039246023	0	0	0.529786229462073	FALSE	FALSE	0	0	0.056793500861692	FALSE	0.451514309530425	0.876214305879269	0.746468538968646	1	0.596428503562233	0.00586374686213418	1	0.295418285946121	0.171819627413625	0.530547663694678	FALSE	rs11586273	1	FALSE	FALSE
ENSG00000197958.8	RPL12	57.9446565053105	306.94008779329	-	4.10906736420844e-05	FALSE	TRUE	FALSE	FALSE	NA	-	NA	NA	0.711737566720718	0.180307366375462	0.787028616873327	0	0	0.0842409761742023	FALSE	TRUE	0.512214868293641	0	0.798303848064314	FALSE	0.292025562656293	-0.219792981294289	-1	1	-1	-1	1	0.330328298700592	0.178480166077219	0.675106286581092	FALSE	rs7871448	1	FALSE	FALSE
ENSG00000258761.1	NA	11.3249811452514	11.2921516309954	+	4.11460701685196e-05	TRUE	FALSE	FALSE	FALSE	NA	+	NA	NA	0	0	0.47819545690562	0.312252951779384	0	0.678011179403025	FALSE	FALSE	0	0	0.32707880709946	FALSE	0.235954431786607	1	0.80296446260447	1	1	0.000637726999450317	1	-0.145458786153587	-0.272615628789911	0.218559982819396	FALSE	rs6496877	1	FALSE	FALSE
ENSG00000135002.7	RFK	1.63102192585895	0.502991097670888	-	4.11497955234489e-05	FALSE	TRUE	FALSE	FALSE	NA	-	+	0.588	0	0	0.666910183594176	0	0	0.471505747304468	FALSE	FALSE	0	0	0.107177403392196	FALSE	0.106640733537094	1	-0.540939153063294	1	-0.330405191584559	-1	0.567518994598905	0.337901620166126	0.236201712649257	0.598168406283159	FALSE	rs1353342	1	FALSE	FALSE
ENSG00000052802.8	MSMO1	2.88156843381843	0.778835271385493	-	4.13512545437001e-05	FALSE	TRUE	FALSE	FALSE	NA	-	+	0.142	0.447027804570008	0	0.749219887463473	0.189132926426435	0	0.481017045548925	FALSE	FALSE	0.166676388896703	0	0.42298608287205	FALSE	0.323367602111698	1	0.815776831153734	1	1	-0.00202011364574978	1	0.0443864213131329	-0.0661088990595003	0.454739134484856	FALSE	rs4691228	1	FALSE	FALSE
ENSG00000010610.5	CD4	72.2731926296783	308.067544897296	+	4.1484375964557e-05	TRUE	FALSE	FALSE	FALSE	NA	+	-	0.758	0.0576150730120448	0	0.675500533681459	0	0	0	FALSE	FALSE	0	0	0.0593892226650509	FALSE	0.629841622672965	0.980002605574598	0.843015120135565	1	0.714351596077824	0.600820070579225	1	0.324190537380997	0.253516167150111	0.563901551756937	FALSE	rs25680	1	FALSE	FALSE
ENSG00000185834.9	RPL12P4	10.7360275943396	15.6391517137434	-	4.1754705073855e-05	FALSE	TRUE	FALSE	FALSE	NA	-	NA	NA	0.494869091822494	0	0.679633353602991	0	0	0.258387218488868	FALSE	FALSE	0.0505829592396492	0	0.632895925210097	FALSE	0.2085579327591	1	1	1	-1	-1	1	0.0766735066526061	-0.0231786414513888	0.394259977907649	FALSE	rs6069316	1	TRUE	FALSE
ENSG00000233913.6	NA	148.652433456873	2434.42632897714	-	4.24482769880744e-05	FALSE	TRUE	FALSE	FALSE	NA	-	NA	NA	0.521043732849824	0	0.658035837805353	0	0	0.292883645249275	FALSE	FALSE	0	0	0.438859066929238	FALSE	0.274909697138094	-0.500666818299851	-1	1	1	-0.78454463253933	1	0.145084181620549	6.99937892564141e-05	0.45267580177779	FALSE	rs17070503	1	TRUE	FALSE
ENSG00000103363.10	TCEB2	51.705153024911	291.69754060143	-	4.24631603018803e-05	FALSE	TRUE	FALSE	FALSE	NA	-	+	2.02e-05	0.574105291282717	0.177460869026937	0.764396179983691	0	0	0.149335962907636	FALSE	TRUE	0.0543151790550031	0	0.575431005288667	FALSE	0.236398999722145	1	1	1	-1	-1	1	-0.0206655027379292	-0.152154453317782	0.275553368797646	FALSE	rs3112687	1	FALSE	FALSE
ENSG00000140479.12	PCSK6	0.490556857780682	0.0717161558841714	+	4.26854454808793e-05	TRUE	FALSE	FALSE	FALSE	NA	-	+	0.399	0	0	0.319612957710969	0.577190166044746	0	0.843123595064543	FALSE	FALSE	0	0	0.335743348912645	FALSE	0.610002778549597	1	1	1	1	1	1	0.132353635008944	-0.319520683739228	0.467681639178107	FALSE	rs963333	1	FALSE	FALSE
ENSG00000141622.8	RNF165	0.292149141678495	0.0204793121430569	-	4.2974276083741e-05	FALSE	TRUE	FALSE	FALSE	NA	-	+	0.000159	0.130055378922431	0	0.502366505567972	0.115456030622657	0	0.420608352669461	FALSE	FALSE	0.217780307576964	0	0.460990818416202	FALSE	0.561489302584051	0.154764783216293	-0.995625662843592	1	0.000204914010206571	-0.000715714559205939	1	0.600469524046155	0.51949182950298	0.752662859880622	FALSE	rs12965245	1	FALSE	FALSE
ENSG00000116161.13	CACYBP	4.46912280701754	1.06082585500609	-	4.30353358577406e-05	FALSE	TRUE	FALSE	FALSE	NA	-	-	2.46e-08	0.154321792865731	0	0.545476184224671	0	0	0.633029998380623	FALSE	FALSE	0	0	0.641616306833361	FALSE	0.194776326757433	-1	-1	1	-1	-1	0.00898141836510504	0.485039578675245	0.406679988942448	0.686296064362504	FALSE	rs12122652	1	FALSE	FALSE
ENSG00000143727.11	ACP1	5.99367995663695	2.09191850121555	-	4.31307791464514e-05	FALSE	TRUE	FALSE	FALSE	NA	-	-	6.47e-07	0.815402754738099	0.165001357471805	0.874081057182036	0	0	0.458779062327455	FALSE	TRUE	0.415746449439133	0	0.649788678549633	FALSE	0.164934704084468	0.262546287973485	-1	1	1	-1	1	0.152026727071637	0.00978562110015727	0.474222086878675	FALSE	rs6755432	1	FALSE	FALSE
ENSG00000259781.1	NA	5.60249903100775	5.65184575036325	-	4.35350924288978e-05	FALSE	TRUE	FALSE	FALSE	NA	-	NA	NA	0.396900539596604	0	0.675963031510675	0	0	0.280186424972311	FALSE	FALSE	0.0123600722766828	0	0.50018706523255	FALSE	0.0873020283412059	-1	-1	1	-1	-1	0.824696637196742	0.160892230338022	0.0651244214523244	0.411239017686543	FALSE	rs7168847	1	FALSE	FALSE
ENSG00000130985.12	UBA1	59.2199657849563	117.199248530066	+	4.36079774640331e-05	TRUE	FALSE	FALSE	FALSE	NA	+	-	0.383	0	0	0.570780748829784	0.109473412521215	0	0.743349029242121	FALSE	FALSE	0	0	0.15067223256197	FALSE	0.437510419560989	1	1	1	1	-0.633209955135401	1	0.0270551721303013	-0.0776583319525379	0.282813350590686	FALSE	NA	NA	FALSE	FALSE
ENSG00000181524.6	RPL24P4	54.0174970238095	767.543090344142	-	4.37298380195971e-05	FALSE	TRUE	FALSE	FALSE	NA	-	NA	NA	0.792545457139225	0.315137393008435	0.886357742167475	0	0	0.335277307124774	FALSE	TRUE	0	0	0.494648361790065	FALSE	0.0298971936649069	1	-0.348799342591879	1	-1	-1	0.624889606932711	-0.0198486403438363	-0.304340206014108	0.392724209262602	FALSE	rs6933124	1	TRUE	FALSE
ENSG00000105193.4	RPS16	139.095829921184	2476.73391641284	-	4.3889928128207e-05	FALSE	TRUE	FALSE	FALSE	NA	-	-	1.13e-07	0.674509138472284	0.142419002540828	0.778186327088402	0	0	0.348241404304539	FALSE	TRUE	0.0787652048000286	0	0.608022212245374	FALSE	0.180161155876632	-0.304304400821574	-1	1	-1	-1	-0.0027629114470299	0.319160747455413	0.16427265299795	0.5625696410326	FALSE	rs12983038	1	FALSE	FALSE
ENSG00000183049.8	CAMK1D	14.8003992129365	12.8602368204854	+	4.40104902749647e-05	TRUE	FALSE	FALSE	FALSE	NA	+	+	0.0589	0.619536892841009	0.180068113189465	0.722905895555106	0.132808054899598	0	0.626544126671225	FALSE	FALSE	0	0	0.355684792724508	FALSE	0.582050569602668	1	1	1	-0.0175076258805162	-1	1	0.171190095150501	-0.035158454375414	0.587162405532516	FALSE	rs4615920	1	FALSE	FALSE
ENSG00000130939.13	UBE4B	6.98558554292929	1.45861122514397	+	4.44665161118952e-05	TRUE	FALSE	FALSE	FALSE	NA	+	+	0.000104	0.261861984444977	0	0.699599405752992	0.103362482011214	0	0.677896076540496	FALSE	FALSE	0	0	0	FALSE	0.291969991664351	1	1	1	-1	-1	0.546225991193093	-0.0170601638995965	-0.169442784231251	0.383099421609971	FALSE	rs9430161	1	FALSE	FALSE
ENSG00000084623.7	EIF3I	37.2108912631272	54.8425626418438	-	4.48712085935253e-05	FALSE	TRUE	FALSE	FALSE	NA	-	-	0.161	0.570695729021378	0.153386425570367	0.718121368531139	0	0	0.764863934315636	FALSE	FALSE	0.353024306085123	0	0.716154145748611	FALSE	0.297360377882745	-0.0134468564728236	-1	1	-1	-1	1	0.364714586808556	0.291148165901343	0.652650394594627	FALSE	rs2105218	1	FALSE	FALSE
ENSG00000267427.1	NA	35.2394105613701	41.3761061455689	+	4.5059536268396e-05	TRUE	FALSE	FALSE	FALSE	NA	-	NA	NA	0.293978405137586	0	0.574591734952488	0	0	0.340526838489371	FALSE	FALSE	0	0	0.281837150898435	FALSE	0.457460405668241	1	1	1	1	0.000588672793024885	1	0.21660431122363	0.0848681416978423	0.459451860307725	FALSE	rs1863999	1	FALSE	FALSE
ENSG00000166747.8	AP1G1	8.02189376084772	2.98178211645796	+	4.51524109700566e-05	TRUE	FALSE	FALSE	FALSE	NA	+	+	4.4e-05	0.463325642105852	0	0.808577846552911	0.87531200631336	0.451158975221074	0.932500384956261	FALSE	FALSE	0.604448189918662	0.0304948272040474	0.885902493468266	TRUE	0.154820783550986	0.248373625447508	0.0585660189083773	1	-1	-1	1	0.251212370278736	0.109947206935357	0.505684987422988	FALSE	rs35999374	0.737729040890899	TRUE	FALSE
ENSG00000257764.1	NA	1995.56592069892	799352.864821934	-	4.54745284877147e-05	FALSE	TRUE	FALSE	FALSE	NA	+	NA	NA	0.630412241641803	0.0277303185822131	0.906306316611378	0.591894993625729	0.0162539926878192	0.842930983574178	FALSE	FALSE	0	0	0.485203843743156	FALSE	0.817560433453737	1	1	1	1	-0.0274065513448229	1	0.554393981943975	0.284244990389926	0.779180459779023	FALSE	rs1144953	1	FALSE	FALSE
ENSG00000176463.8	SLCO3A1	11.9849288710705	4.3576115930385	+	4.56181171392832e-05	TRUE	FALSE	FALSE	FALSE	NA	+	+	5.17e-14	0.538488134824901	0	0.708323607812303	0	0	0.609960916965377	FALSE	FALSE	0	0	0.289299462396668	FALSE	0.484078910808558	1	0.91719161564004	1	-0.00784835272540151	-0.308324281696044	1	0.0365318760901677	-0.0756966630902775	0.267026514751338	FALSE	rs10520712	1	FALSE	FALSE
ENSG00000204574.7	ABCF1	15.131462408313	9.22524206349233	+	4.59336525867662e-05	TRUE	FALSE	FALSE	FALSE	NA	+	-	3.39e-09	0	0	0.351170204681611	0.169755485400071	0	0.574214663645793	FALSE	FALSE	0	0	0.647561264760802	FALSE	0.609002500694638	1	0.107664543742261	1	0.976032971818943	0.135068322929172	1	0.484676051996316	0.439687507472779	0.646507643587657	FALSE	rs114240371	1	TRUE	FALSE
ENSG00000268575.1	NA	7.35989503854517	3.77064603031257	+	4.62049908942521e-05	TRUE	FALSE	FALSE	FALSE	NA	+	NA	NA	0.448904535049639	0	0.819603714641451	0.6418929364611	0.198302722270414	0.796793409732737	FALSE	FALSE	0.19504318757301	0	0.427898941220506	FALSE	0.642622950819672	1	0.970957893038194	1	1	0.00499333018873802	1	0.366192945536218	0.22269415438197	0.664823043807402	FALSE	rs903920	1	FALSE	FALSE
ENSG00000132581.4	SDF2	15.1104855749899	9.41513696441635	-	4.64309332818742e-05	FALSE	TRUE	FALSE	FALSE	NA	-	+	0.00102	0.524426405578175	0	0.759399924475377	0	0	0.384424638186975	FALSE	FALSE	0	0	0.417149985818727	FALSE	0.0934704084467908	1	1	1	-1	-1	1	-0.0497411873253069	-0.138557260350483	0.316866059303184	FALSE	rs1638003	1	FALSE	FALSE
ENSG00000254806.1	SYS1-DBNDD2	8.02490277777778	2.47110045783721	-	4.65168310607422e-05	FALSE	TRUE	FALSE	FALSE	NA	-	NA	NA	0.581152261475622	0.0125574781248955	0.792271412007494	0	0	0.442383716485652	FALSE	FALSE	0.169757483130002	0	0.659988120993164	FALSE	0.186607390941928	1	0.52878445236973	1	-1	-1	1	0.0639720610563	-0.0107400867332409	0.385379548740931	FALSE	rs2072792	1	FALSE	FALSE
ENSG00000169021.4	UQCRFS1	16.2457427192408	9.56860283523602	-	4.66533671483949e-05	FALSE	TRUE	FALSE	FALSE	NA	-	-	0.919	0.323760240324152	0	0.685532555971807	0.149771940824051	0	0.650731039421984	FALSE	FALSE	0.40551886092256	0	0.63831351955901	FALSE	0.281967213114754	-1	-1	1	-1	-1	0.917275321039067	0.411813426160703	0.318485838628912	0.593140308376769	FALSE	rs7253607	1	TRUE	FALSE
ENSG00000100632.6	ERH	10.2822866108787	14.760395283299	-	4.68659209824375e-05	FALSE	TRUE	FALSE	FALSE	NA	-	-	0.865	0.451983430416055	0	0.72183306376331	0	0	0.309649608736033	FALSE	FALSE	0.233139303364403	0	0.689840948842993	FALSE	-0.0142261739372048	-1	-1	0.791263244910454	-1	-1	0.706083939645162	0.115157093059816	0.0300236870923957	0.326501828893772	TRUE	rs61977395	1	FALSE	FALSE
ENSG00000104824.10	HNRNPL	27.2755942866579	13.1177225208601	+	4.69666745802204e-05	TRUE	FALSE	FALSE	FALSE	NA	+	-	0.147	0.40490986644783	0	0.70224071893772	0.195345139027276	0	0.464410052913134	FALSE	FALSE	0.136334318266056	0	0.59497420603468	FALSE	0.486190608502362	-0.253862624322351	-0.564718865932864	1	1	0.000956091169466807	1	0.49586300498603	0.375041677458195	0.670160926827144	FALSE	rs12610267	1	FALSE	FALSE
ENSG00000167632.10	TRAPPC9	1.06008154785743	0.0497604326729657	+	4.70995222582746e-05	TRUE	FALSE	FALSE	FALSE	NA	+	+	0.00236	0	0	0.502852962558307	0	0	0.555219213449814	FALSE	FALSE	0	0	0.27144582942205	FALSE	0.513253681578216	0.586234895387142	0.860056013153048	1	0.549193492032016	0.00223288957668144	1	0.298171264730129	0.161551358909731	0.681619699220542	FALSE	rs741463	1	FALSE	FALSE
ENSG00000163479.9	SSR2	25.0401488561108	28.7825759618728	-	4.72503103684066e-05	FALSE	TRUE	FALSE	FALSE	NA	+	+	0.000112	0.597054328962661	0	0.829706488007805	0	0	0.441330963742315	FALSE	FALSE	0.12315266153597	0	0.642315237733771	FALSE	0.244790219505418	1	-1	1	-0.758181634301666	-1	1	0.233110342432851	0.027446164155678	0.632239723150223	FALSE	rs74520550	1	FALSE	FALSE
ENSG00000135940.2	COX5B	37.7160075731198	98.4327603769946	-	4.77042252293074e-05	FALSE	TRUE	FALSE	FALSE	NA	+	+	1.22e-09	0.191857821409706	0	0.407999007190459	0	0	0.528155057135756	FALSE	FALSE	0	0	0.344814493810483	FALSE	0.210669630452904	1	0.804060599687193	1	-1	-1	1	0.226187025366382	0.142627731309775	0.471667556606581	FALSE	rs7590131	1	FALSE	FALSE
ENSG00000100219.12	XBP1	35.1457499172733	97.1820295733584	-	4.78738465147728e-05	FALSE	TRUE	FALSE	FALSE	NA	-	-	0.00084	0.413418078711304	0	0.809698931895042	0.179944551383954	0	0.584992733896708	FALSE	FALSE	0	0	0.229830520392787	FALSE	0.602667407613226	1	0.99567305567821	1	1	0.00647273838659494	1	0.348719575996316	0.275532002555241	0.539919457767591	FALSE	rs10427628	1	FALSE	TRUE
ENSG00000198574.4	SH2D1B	4.68003034371643	6.36133169574037	-	4.87710439353507e-05	FALSE	TRUE	FALSE	FALSE	NA	-	+	6.19e-13	0	0	0.512398423028323	0.128207303957125	0	0.529872463211939	FALSE	FALSE	0	0	0.49160332521836	FALSE	0.553431508752431	NA	NA	NA	NA	NA	NA	NA	NA	NA	FALSE	rs35154054	1	FALSE	FALSE
ENSG00000143183.11	TMCO1	2.4005237080567	1.85651056537053	-	4.89858390844513e-05	FALSE	TRUE	FALSE	FALSE	NA	-	+	0.0702	0.340199829776907	0	0.591746918224461	0	0	0.462673755266082	FALSE	FALSE	0	0	0.311033406198757	FALSE	0.176882467352042	1	-0.764668175376107	1	0.999994392312078	-1	1	-0.00138548217955643	-0.127996673742219	0.367122128151337	FALSE	rs16853627	1	FALSE	FALSE
ENSG00000072958.4	AP1M1	30.6483364599789	24.8948733910135	+	4.92464795117512e-05	TRUE	FALSE	FALSE	FALSE	NA	+	+	0.438	0	0	0.337782573611214	0	0	0.122541795666286	FALSE	FALSE	0	0	0.491018283403402	FALSE	0.659349819394276	0.786693370472976	0.856882858940911	1	0.99002988978212	0.213643533297522	1	0.292252273833029	0.230673506811429	0.571206397015052	FALSE	rs60226512	1	FALSE	FALSE
ENSG00000261737.1	NA	0.3373078125	0.0650197710582392	-	4.95871259169063e-05	FALSE	TRUE	FALSE	FALSE	NA	-	NA	NA	0	0	0.345332725185805	0	0	0.0943577929801319	FALSE	FALSE	0	0	0.527457637510237	FALSE	0.320366768546819	-1	-1	0.999968337414593	0.572799465182999	-1	1	0.360595825197299	0.273194419351957	0.648651754192568	TRUE	rs2180764	1	FALSE	FALSE
ENSG00000171700.9	RGS19	106.901532139291	281.148824738297	-	4.97066244361104e-05	FALSE	TRUE	FALSE	FALSE	NA	-	+	0.135	0.355219584924068	0	0.606570108324335	0.0152716903466471	0	0.566033594477956	FALSE	FALSE	0	0	0.667997621825083	FALSE	0.267185329258127	1	0.206537910527774	1	-1	-1	1	0.272346747330947	0.214123313946689	0.51318962566353	FALSE	rs6062347	0.937162691035303	TRUE	FALSE
ENSG00000197249.8	SERPINA1	322.143700107296	7785.10339333604	+	4.97447696278034e-05	TRUE	FALSE	FALSE	FALSE	NA	+	+	0.000554	0.52985693295335	0	0.70893705445583	0.341533719077333	0	0.660855079951393	FALSE	FALSE	0	0	0.283613069563338	FALSE	0.512031119755488	1	1	1	0.00156991672526666	0.00171119691055662	1	0.108769298429419	0.0602107765833227	0.455853063055978	FALSE	rs1004958	1	FALSE	FALSE
ENSG00000136003.11	ISCU	19.399128973174	19.4164038552046	-	5.01721547867479e-05	FALSE	TRUE	FALSE	FALSE	NA	-	-	0.00053	0.847349433392162	0.591507718329475	0.893268700599741	0	0	0.524035166368713	FALSE	TRUE	0.620148435923453	0	0.800486938654525	FALSE	0.483801055848847	1	0.784036587284962	1	1	-1	1	0.206431648842169	0.0648139927193248	0.508978762211825	FALSE	rs80240600	0.736322137253389	TRUE	FALSE
ENSG00000115350.7	POLE4	6.47324784281716	5.33299217353076	-	5.03787956349746e-05	FALSE	TRUE	FALSE	FALSE	NA	+	+	7.03e-09	0.489179254433516	0	0.697195761183006	0	0	0.414595873856063	FALSE	FALSE	0.0922662867165594	0	0.60486443429905	FALSE	0.168491247568769	1	-1	1	-1	-1	1	0.123395232406964	0.00166305457406811	0.402797357859828	FALSE	rs6546997	1	FALSE	FALSE
ENSG00000175166.12	PSMD2	20.2769421662376	10.5263455221534	+	5.03957686110602e-05	TRUE	FALSE	FALSE	FALSE	NA	+	-	0.852	0	0	0.16377434195907	0	0	0.582857675926497	FALSE	FALSE	0	0	0.54798166237076	FALSE	0.535871075298694	1	0.412055364528945	1	0.733116206253403	0.549363394579361	1	0.385300249369845	0.29901834633701	0.61185732601336	FALSE	rs6790275	1	FALSE	FALSE
ENSG00000151465.7	CDC123	27.5266614910079	22.800431866333	-	5.06637352702647e-05	FALSE	TRUE	FALSE	FALSE	NA	-	-	0.0406	0.576396565645432	0	0.707213184447692	0.490560951585191	0	0.839171263031137	FALSE	FALSE	0	0	0.515259267878266	FALSE	0.287302028341206	1	0.802728266271035	1	-1	-1	0.999992248383752	0.0539942561743462	-0.153947529192023	0.404410080485432	FALSE	rs11528650	1	FALSE	FALSE
ENSG00000103653.12	CSK	97.564224380754	178.266740570844	+	5.0671638414627e-05	TRUE	FALSE	FALSE	FALSE	NA	+	-	0.405	0.0601656819184865	0	0.584596267784968	0	0	0.692187298708448	FALSE	FALSE	0	0	0.464451683772326	FALSE	0.542039455404279	1	1	1	0.48571826968334	-0.00118312977053116	1	0.151885208889424	-0.00427018957575596	0.467361977401436	FALSE	rs2304717	1	FALSE	FALSE
ENSG00000136560.8	TANK	5.33651437117668	4.03486639202813	-	5.07444496548253e-05	FALSE	TRUE	FALSE	FALSE	NA	-	+	0.00332	0	0	0.0921459362848217	0.33786582781252	0	0.795831988327952	FALSE	FALSE	0	0	0.271959548890626	FALSE	0.350597388163379	1	0.309705110064032	1	0.282979749216296	0.0476800681154478	1	0.358263161350098	0.304272073731395	0.634067981178072	FALSE	rs16844882	0.533672262928097	TRUE	FALSE
ENSG00000145365.9	TIFA	3.86983309614168	2.89646680904091	-	5.11911764334464e-05	FALSE	TRUE	FALSE	FALSE	NA	-	-	0.147	0.206083138649171	0	0.631444464803838	0.467579919462212	0	0.840526776701835	FALSE	FALSE	0	0	0.395248479876364	FALSE	0.583161989441512	1	0.895052471972991	1	0.490813305709861	0.467482060445216	0.872574697585988	0.0814115500218707	0.0182027498020697	0.323644720464809	FALSE	rs716051	1	FALSE	FALSE
ENSG00000156127.6	BATF	13.6738546571136	15.0858379067363	-	5.14163089643558e-05	FALSE	TRUE	FALSE	FALSE	NA	-	+	1.92e-19	0.452367837713666	0	0.710276822407396	0.0758548402475463	0	0.718793228953579	FALSE	FALSE	0	0	0.238867245812875	FALSE	0.44584606835232	1	1	1	-1	-1	1	0.17219525636991	-0.0527489203639627	0.584106321804349	FALSE	rs4903385	1	FALSE	FALSE
ENSG00000157954.10	WIPI2	13.4951864399688	2.00598156998712	+	5.14165359345216e-05	TRUE	FALSE	FALSE	FALSE	NA	-	+	0.0339	0	0	0.455241202099589	0.0368650597493298	0	0.621043467634816	FALSE	FALSE	0	0	0	FALSE	0.516976938038344	1	1	1	0.00358751868059313	-1	1	0.362685809213599	0.253055317363606	0.577091354067589	FALSE	rs10279978	1	FALSE	FALSE
ENSG00000186105.7	LRRC70	0.223608700489542	0.0409116461038943	-	5.169638997045e-05	FALSE	TRUE	FALSE	FALSE	NA	-	NA	NA	0.146871117102153	0	0.629242871894515	0	0	0.487055059229179	FALSE	FALSE	0.0692052907534762	0	0.452198184330674	FALSE	0.175771047513198	1	0.318125140972289	1	0.00269252831544751	0.00297106386459013	1	0.0666924697616834	-0.00813063859418079	0.278862225785474	FALSE	rs4388169	1	FALSE	FALSE
ENSG00000229994.1	RPL5P4	2.81754435028249	2.81989893514376	-	5.18505986680583e-05	FALSE	TRUE	FALSE	FALSE	NA	-	NA	NA	0.492932185851213	0	0.674478426678794	0	0	0.341186029425695	FALSE	FALSE	0.46321387705674	0	0.619478889413345	FALSE	-0.0613503751041956	-1	-1	1	1	-1	1	0.0762197542414792	-0.0598909606549804	0.405964778040043	FALSE	rs77675202	1	FALSE	FALSE
ENSG00000203394.2	NA	33.5174144736842	55.6780833806659	+	5.20597177486055e-05	TRUE	FALSE	FALSE	FALSE	NA	-	NA	NA	0.0679004930946024	0	0.379365124769993	0.269733556030494	0	0.583335196079592	FALSE	FALSE	0.271131395228884	0	0.519869856177095	FALSE	-0.0405668241178105	-0.904831382487103	-1	1	0.00102703286855688	-0.00225471852575684	1	0.20592562458669	0.00376314886355722	0.424443821854818	FALSE	rs61729970	1	FALSE	FALSE
ENSG00000198763.3	MT-ND2	1499.88512980307	298692.729949309	-	5.23351938868607e-05	FALSE	TRUE	FALSE	FALSE	NA	-	NA	NA	0.0389236558477515	0	0.315972417866501	0	0	0.559228372398026	FALSE	FALSE	0	0	0.182180407229332	FALSE	0.0338983050847458	0.998553883953021	0.531340537196815	1	1	-0.399988494430761	1	0.225311119038747	0.0941389166082691	0.459085246963124	FALSE	NA	NA	FALSE	FALSE
ENSG00000181789.10	COPG1	23.2934189588543	11.8697941818725	+	5.23696814786833e-05	TRUE	FALSE	FALSE	FALSE	NA	+	+	0.00646	0	0	0.26159404069086	0	0	0.525832594683022	FALSE	FALSE	0	0	0	FALSE	0.378605168102251	0.992880345008052	0.429782159550127	1	0.523026582881941	-0.990749409962437	1	0.130280987068693	0.00885942924804813	0.368313971519601	FALSE	rs9821324	1	FALSE	FALSE
ENSG00000168066.16	SF1	82.6378116711432	174.759458896805	+	5.26098384345217e-05	TRUE	FALSE	FALSE	FALSE	NA	+	-	0.000782	0	0	0.521008534244968	0	0	0.231924518199753	FALSE	FALSE	0	0	0.110296314305864	FALSE	0.437121422617394	0.971749064473542	0.974510529553241	1	0.503820672982548	-1	1	0.340914580589028	0.236531361322718	0.533003904190871	FALSE	rs57827982	1	FALSE	TRUE
ENSG00000072736.14	NFATC3	9.65518070729487	4.98308123496858	+	5.29349043350246e-05	TRUE	FALSE	FALSE	FALSE	NA	+	-	0.000423	0	0	0.531761591813797	0.693981461507402	0	0.805439286213731	FALSE	FALSE	0	0	0.632396788242437	FALSE	0.221061405946096	1	0.0447655097506522	1	-0.0315875932438676	-1	1	0.54168910572562	0.484051326526085	0.74171717674921	FALSE	rs74635048	0.779399096429093	TRUE	FALSE
ENSG00000171552.8	BCL2L1	51.4555539652568	906.747768831624	+	5.29354540467638e-05	TRUE	FALSE	FALSE	FALSE	NA	-	+	0.00243	0.356680409828828	0.0471751256692758	0.528918200543262	0.259607282314825	0	0.777133423080919	FALSE	FALSE	0	0	0.625888995864538	FALSE	0.576938038343985	1	1	1	1	0.0184418093774398	1	0.642550435336123	0.443628651312498	0.77157585067886	FALSE	rs6119758	1	FALSE	TRUE
ENSG00000082515.12	MRPL22	0.625254419311918	0.0451660461702634	-	5.31935231566272e-05	FALSE	TRUE	FALSE	FALSE	NA	+	-	0.334	0	0	0.570740838709086	0	0	0.220498477241643	FALSE	FALSE	0	0	0.0955209500990146	FALSE	0.116087802167269	-0.906832688332311	-1	0.999819920539319	-1	-1	1	0.0226301174802156	-0.0779417721605787	0.198372959496609	TRUE	rs77075605	1	FALSE	FALSE
ENSG00000229097.1	CALM2P2	3.65473092255125	2.31660089223394	-	5.33327826389629e-05	FALSE	TRUE	FALSE	FALSE	NA	-	NA	NA	0.0654539089888674	0	0.370798835878989	0	0	0.0114828460484501	FALSE	FALSE	0	0	0.17595930669107	FALSE	0.182995276465685	1	0.229108095701143	1	0.00379480957511878	0.00240858326849948	1	0.188995747715217	0.105146282708659	0.384557328133513	FALSE	rs2683570	1	FALSE	FALSE
ENSG00000178386.7	ZNF223	0.761994436090226	0.0656405811458047	-	5.36393616219356e-05	FALSE	TRUE	FALSE	FALSE	NA	-	-	0.748	0.17472320009376	0	0.407166073939904	0.182153434320373	0	0.531781443909501	FALSE	FALSE	0	0	0.0101745293867913	FALSE	0.296082245068075	1	1	1	0.00149010946809387	0.000276353567403832	1	0.220585140667021	0.152819972744818	0.467354001528068	FALSE	rs56104922	1	FALSE	FALSE
ENSG00000057663.8	ATG5	1.90914514687101	0.750108518715249	-	5.36888860053365e-05	FALSE	TRUE	FALSE	FALSE	NA	-	-	0.0281	0.686251005967431	0.00408785092187456	0.903063154319739	0	0	0.301034365487943	FALSE	FALSE	0	0	0.177443859192143	FALSE	0.146262850791887	1	1	1	-0.537628610323911	-1	1	0.0386486255884042	-0.0688503248807769	0.361709405613699	FALSE	rs11153053	1	FALSE	FALSE
ENSG00000140988.10	RPS2	115.723898123185	1120.0860291723	-	5.39843061852726e-05	FALSE	TRUE	FALSE	FALSE	NA	-	-	9.51e-11	0.408893774197927	0	0.621459318249685	0	0	0.435207293445766	FALSE	FALSE	0.356177900554366	0	0.5430319459181	FALSE	0.347263128646846	0.0016323961834356	-1	1	1	-1	1	0.304295090863953	0.195440143755545	0.508586198096107	FALSE	rs2050152	1	FALSE	FALSE
ENSG00000177889.5	UBE2N	6.78687830558276	3.91402566355359	-	5.39901635148847e-05	FALSE	TRUE	FALSE	FALSE	NA	-	-	1.88e-05	0.439244479164129	0	0.696380704597653	0	0	0.511845413558091	FALSE	FALSE	0.018167448931608	0	0.467396018352345	FALSE	0.153820505696027	1	-0.918148321156757	1	-1	-1	1	0.0602252297686464	-0.0616699061914073	0.436624552531179	FALSE	rs270870	1	FALSE	FALSE
ENSG00000143185.3	XCL2	3.21046285587189	5.96279775938366	-	5.40634489309721e-05	FALSE	TRUE	FALSE	FALSE	NA	-	NA	NA	0.640661200121588	0	0.85063022743881	0.2237937940018	0	0.75097111329236	FALSE	FALSE	0.387553030856964	0	0.696561815460735	FALSE	0.65162545151431	0.720255946868061	0.691387615630969	1	0.000703739501413422	0.000778616757537389	1	0.484645384398317	0.319568435339084	0.750092476035055	FALSE	rs2984590	1	FALSE	FALSE
ENSG00000218227.3	NA	47.4854042372881	249.002551982495	-	5.42435995136231e-05	FALSE	TRUE	FALSE	FALSE	NA	-	NA	NA	0.645527566620686	0.0740818062421218	0.734290510389764	0	0	0	FALSE	TRUE	0	0	0.332802380453007	FALSE	0.234676298971937	1	-0.25214779179817	1	-1	-1	1	0.268404379876533	0.15855569383072	0.541884862886368	FALSE	rs72648830	1	FALSE	FALSE
ENSG00000070831.11	CDC42	62.4204822976879	131.005229471519	-	5.4246217580319e-05	FALSE	TRUE	FALSE	FALSE	NA	-	+	0.00211	0	0	0.321274523380787	0	0	0.483716852454374	FALSE	FALSE	0	0	0.469720351461539	FALSE	0.256015559877744	0.428770159354842	0.140638981350871	1	0.531909866685789	0.304017099272589	1	0.120644643177867	-0.0970731726585568	0.598195251015896	FALSE	rs12759638	1	FALSE	FALSE
ENSG00000111727.7	HCFC2	0.722776162790698	0.115067138845792	-	5.48516610287559e-05	FALSE	TRUE	FALSE	FALSE	NA	-	-	0.865	0	0	0.565099074964643	0.174178475989647	0	0.596787379525975	FALSE	FALSE	0	0	0.467535200902782	FALSE	0.341261461517088	1	0.901676802064103	1	-1	-1	1	0.255716513582172	0.191599287408448	0.494477294049715	FALSE	rs703641	1	FALSE	FALSE
ENSG00000243147.3	MRPL33	8.68768921568627	4.16761494777057	-	5.50222964972892e-05	FALSE	TRUE	FALSE	FALSE	NA	+	-	0.453	0.434718396816313	0	0.685815259176817	0	0	0.462355319581814	FALSE	FALSE	0.209479798275891	0	0.614382817460454	FALSE	0.324812447902195	1	1	1	1	0.202368245766405	1	-0.173434138829676	-0.354298271485258	0.163079570081945	FALSE	rs11902458	1	FALSE	FALSE
ENSG00000249915.2	PDCD6	6.92532664223956	1.3997350132157	-	5.53339576333203e-05	FALSE	TRUE	FALSE	FALSE	NA	-	NA	NA	0	0	0.639795553979596	0.104560104855897	0	0.49632760749615	FALSE	FALSE	0	0	0.287555635840315	FALSE	0.350930814115032	1	0.997016211096188	1	1	-1	1	0.0834496337553308	-0.016840982464529	0.291652731174746	FALSE	rs12108806	1	FALSE	FALSE
ENSG00000188917.9	TRMT2B	8.11946273777992	2.75705791377706	+	5.54425668975144e-05	TRUE	FALSE	FALSE	FALSE	NA	+	-	0.0411	0.177642293953554	0	0.499534668335812	0	0	0.19943182153977	FALSE	FALSE	0.255614586456557	0	0.385466584136129	FALSE	0.603612114476244	0.608448656347062	-0.319901866662768	1	0.00472758118259001	0.00300164288527401	1	0.578603555945823	0.485962469942402	0.717784626563434	FALSE	NA	NA	FALSE	FALSE
ENSG00000181852.12	RNF41	11.3193900559391	2.40427485863612	-	5.56723347278088e-05	FALSE	TRUE	FALSE	FALSE	NA	+	+	0.0224	0.178394745930727	0	0.604136484512069	0	0	0.361281750341785	FALSE	FALSE	0.255321444541883	0	0.657941782279225	FALSE	0.274854126146152	0.0447402911983409	-0.998922245519173	1	0.552251005909799	-0.153850790092521	1	0.0849322102322651	-0.0168893082865423	0.416276275000531	FALSE	rs7953356	1	FALSE	FALSE
ENSG00000177879.10	AP3S1	5.09806589268905	1.82696222298484	-	5.6001539883771e-05	FALSE	TRUE	FALSE	FALSE	NA	-	+	0.000134	0.255464520157258	0	0.651638780411401	0	0	0.63912912727867	FALSE	FALSE	0	0	0.377852898144408	FALSE	0.258349541539317	1	0.996548544956394	1	-1	-1	1	0.109712690504082	-0.0493327196020278	0.470095058523065	FALSE	rs256940	1	FALSE	FALSE
ENSG00000087903.8	RFX2	4.73441649278141	3.13799174054787	+	5.68304865130968e-05	TRUE	FALSE	FALSE	FALSE	NA	-	+	0.00129	0.694413448653671	0.286168741429791	0.870891185033251	0.413222248870232	0	0.688323414405654	FALSE	FALSE	0	0	0.661550957557114	FALSE	0.609113642678522	1	1	1	0.0139614262639848	-0.00208150490046393	1	0.346852451376332	0.227085590433193	0.732690147489203	FALSE	rs113846482	1	FALSE	FALSE
ENSG00000167004.8	PDIA3	21.5356660849503	18.9021584737237	+	5.68626952815649e-05	TRUE	FALSE	FALSE	FALSE	NA	+	NA	NA	0	0	0.421142867249708	0	0	0.690531637336872	FALSE	FALSE	0	0	0.0556983033792418	FALSE	0.543706585162545	0.985072332321408	0.476967084145299	1	0.640044880768612	0.556261063249482	1	0.187193690168735	0.106504748060229	0.511099027544753	FALSE	rs35302555	1	FALSE	TRUE
ENSG00000139644.7	TMBIM6	122.614709354441	151.786935854887	+	5.69016917144731e-05	TRUE	FALSE	FALSE	FALSE	NA	-	+	0.000602	0.423283002817369	0.0606615973205481	0.653514673709	0.537558210041264	0	0.674385682391103	FALSE	FALSE	0	0	0.349482876865063	FALSE	0.408168935815504	1	1	1	-1	-1	1	-0.0213140892280038	-0.153652139157173	0.44503530584672	FALSE	rs11169312	1	FALSE	FALSE
ENSG00000242071.2	RPL7AP6	96.761036637931	1042.8284829056	-	5.70320406652358e-05	FALSE	TRUE	FALSE	FALSE	NA	-	NA	NA	0.692444281646042	0.287969994291039	0.805249498096966	0	0	0.364344049441185	FALSE	TRUE	0.324794164943076	0	0.737758498540359	FALSE	0.164879133092526	-0.0834445519300164	-0.999460668923295	1	-1	-1	1	0.27001001710684	0.0795086051936246	0.533980995934487	FALSE	rs4902778	1	FALSE	FALSE
ENSG00000078596.6	ITM2A	11.8916705601761	32.8893782625371	-	5.72391378979538e-05	FALSE	TRUE	FALSE	FALSE	NA	-	-	5.08e-12	0.764822848298529	0.323096957085073	0.828613870288449	0.356685189124986	0	0.651625315667973	FALSE	FALSE	0	0	0.397937430677804	FALSE	0.494915254237288	1	0.976796033619841	1	-1	-1	1	-0.068116325383198	-0.225816244772114	0.42313340114217	FALSE	NA	NA	FALSE	FALSE
ENSG00000077150.13	NFKB2	42.4986710334381	76.1739114004945	+	5.72606355900534e-05	TRUE	FALSE	FALSE	FALSE	NA	+	-	0.0878	0.0218148631275411	0	0.5673602090389	0	0	0.66274057035801	FALSE	FALSE	0	0	0.635296486553778	FALSE	0.401722700750208	1	1	1	-1	-1	1	0.115411080705252	-0.0232414175939411	0.430995099387212	FALSE	rs12775485	1	FALSE	FALSE
ENSG00000145569.4	FAM105A	4.00610647687718	2.2398470035671	-	5.77050905417209e-05	FALSE	TRUE	FALSE	FALSE	NA	-	+	0.075	0.387790784983863	0	0.771483968896258	0	0	0.15516305080011	FALSE	FALSE	0	0	0.356664866243248	FALSE	0.383495415393165	1	1	1	1	-1	1	0.381342878613958	0.260049001851304	0.593397603364242	FALSE	rs1373942	1	FALSE	FALSE
ENSG00000188603.12	CLN3	26.9772911191183	22.0323542889263	+	5.78641456179371e-05	TRUE	FALSE	FALSE	FALSE	NA	+	NA	NA	0	0	0.312764569583269	0	0	0.386760975564425	FALSE	FALSE	0	0	0	FALSE	0.507363156432342	1	1	1	0.655140933417083	0.00645570278490543	1	-0.0108421130429753	-0.10642098997843	0.171313716777708	FALSE	rs189970	1	FALSE	FALSE
ENSG00000226976.1	COX6A1P2	11.9600245614035	16.9299645933464	-	5.78848728019125e-05	FALSE	TRUE	FALSE	FALSE	NA	-	NA	NA	0.369017269473651	0	0.575247249609094	0	0	0.572157436096187	FALSE	FALSE	0	0	0.452954167534479	FALSE	-0.0252848013337038	1	-1	1	-1	-1	1	0.0448013149782695	-0.111338102634033	0.487673838653065	FALSE	rs7751412	0.35437446603491	TRUE	FALSE
ENSG00000114861.14	FOXP1	4.38492895588678	1.61222941158985	+	5.79889865296263e-05	TRUE	FALSE	FALSE	FALSE	NA	+	-	6.98e-09	0.296702788552877	0	0.586508488303505	0.527472419344826	0.0247734651887962	0.798021342297801	FALSE	FALSE	0	0	0.445805074394235	FALSE	0.428174492914699	1	1	1	-1	-1	1	0.207754527834781	0.115975524988614	0.497406015875529	FALSE	rs6549411	1	FALSE	FALSE
ENSG00000158545.11	ZC3H18	9.6578198789248	2.9070949077708	+	5.8310798978628e-05	TRUE	FALSE	FALSE	FALSE	NA	+	+	0.498	0	0	0.413427286744308	0	0	0.400760980007722	FALSE	FALSE	0	0	0.073185542760887	FALSE	0.422728535704362	0.962988687693972	0.931433346240681	1	1	-0.00316570257028334	1	0.300568618126369	0.216320532578447	0.514310044613894	FALSE	rs12597391	1	FALSE	FALSE
ENSG00000184900.11	SUMO3	15.2168644534116	6.82090995920697	-	5.85819591780488e-05	FALSE	TRUE	FALSE	FALSE	NA	-	-	0.654	0.578571795859995	0.0838795988213928	0.699291346401682	0	0	0.486673266840893	FALSE	TRUE	0.168392547745353	0	0.621526042553382	FALSE	0.414059460961378	1	-0.320055105313557	1	-1	-1	1	0.347236667798454	0.297744994270621	0.510083988562691	FALSE	rs647688	1	FALSE	FALSE
ENSG00000147677.6	EIF3H	18.1391704917394	14.1596498178353	-	5.86420339701343e-05	FALSE	TRUE	FALSE	FALSE	NA	-	-	1.11e-27	0.613154303609263	0.180301586232385	0.714911936022279	0	0	0.148112824912876	FALSE	TRUE	0.354562246225393	0	0.524117790001098	FALSE	0.149819394276188	-0.700977492187305	-1	1	-1	-1	1	0.195953277823958	0.0680168470404327	0.469273587605435	FALSE	rs2635124	1	FALSE	FALSE
ENSG00000205208.4	C4orf46	0.757465464055794	0.0860800037915114	-	5.90279660892899e-05	FALSE	TRUE	FALSE	FALSE	NA	-	NA	NA	0	0	0.282256377508359	0	0	0.597429317593331	FALSE	FALSE	0	0	0.521256657535715	FALSE	0.13098082800778	-1	-1	-0.0833576466536901	-1	-1	1	0.257489007191475	0.167262182372133	0.485667959144839	TRUE	rs28600726	1	FALSE	FALSE
ENSG00000110274.9	CEP164	3.70580360160966	0.582475782931979	+	5.90859416117105e-05	TRUE	FALSE	FALSE	FALSE	NA	+	+	0.082	0	0	0.502385073985067	0	0	0.468828784962552	FALSE	FALSE	0	0	0.377146384828458	FALSE	0.371492081133648	0.979224054322945	0.678692867110778	1	0.548605842387408	0.00070496453188581	1	0.307817935911302	0.190364042655864	0.55918677421284	FALSE	rs73011181	1	FALSE	FALSE
ENSG00000100109.12	TFIP11	15.6811108033241	7.47364118740917	+	5.94019640775654e-05	TRUE	FALSE	FALSE	FALSE	NA	+	-	0.194	0.587153872735761	0	0.751269559068246	0.605624608685042	0.208086463922094	0.843002236568468	FALSE	FALSE	0.0958806062605311	0	0.470352210691115	FALSE	0.698305084745763	0.79872442159345	0.782230428807893	1	0.850087757202684	0.0029262709597454	1	0.275705265150863	0.163789772147756	0.550480192807892	FALSE	rs6519708	0.979022351665767	TRUE	FALSE
ENSG00000117500.8	TMED5	3.78623748407305	3.63538318866584	-	5.9592299998769e-05	FALSE	TRUE	FALSE	FALSE	NA	-	+	0.974	0	0	0.669093535475742	0.0886729560092598	0	0.68735959672656	FALSE	FALSE	0	0	0.255534579767616	FALSE	0.199666574048347	1	0.989601037747884	1	0.330378836564048	-0.0139561618982243	1	0.158560908519855	0.0227121556290401	0.446961125841857	FALSE	rs4147820	1	FALSE	FALSE
ENSG00000110871.10	COQ5	3.48392481090764	0.896732776658846	-	5.98465906722583e-05	FALSE	TRUE	FALSE	FALSE	NA	-	NA	NA	0.410738399721038	0	0.658735346035118	0	0	0.258228727727392	FALSE	FALSE	0.14210140642195	0	0.446532051430559	FALSE	0.32492358988608	0.0746540126834518	-1	1	0.000431708799607576	-0.000223079582995402	1	0.0975902431698065	-0.0107639696985088	0.292551622132074	FALSE	rs73214189	1	FALSE	FALSE
ENSG00000065000.11	AP3D1	15.6977649027826	6.7184340817551	+	6.01341571303765e-05	TRUE	FALSE	FALSE	FALSE	NA	+	-	0.514	0	0	0.378939311451821	0	0	0.306384019476079	FALSE	FALSE	0	0	0.306034428917746	FALSE	0.419616560155599	0.911279143958862	0.692578814515707	1	1	0.00449581477187428	1	0.226951598143888	0.138228696197272	0.438899483350757	FALSE	rs6510636	1	FALSE	FALSE
ENSG00000166685.6	COG1	15.4144650436575	3.7693852089674	+	6.02340123710267e-05	TRUE	FALSE	FALSE	FALSE	NA	+	-	0.0403	0.174715198050282	0	0.657797968960774	0	0	0.377699855027781	FALSE	FALSE	0.0739770088601751	0	0.542279577029759	FALSE	0.514976382328425	0.248388668286283	0.238524092638863	1	0.566408326869721	0.00432275442674944	1	0.43601486417163	0.370787559859266	0.660032157603955	FALSE	rs4793293	1	FALSE	FALSE
ENSG00000173207.7	CKS1B	0.435888614922813	0.0507740291111742	-	6.05188013464268e-05	FALSE	TRUE	FALSE	FALSE	NA	-	NA	NA	0.23460531273981	0	0.69642776629899	0	0	0.263580766598202	FALSE	FALSE	0	0	0.178335955772299	FALSE	0.120311197554876	-1	-0.999999880806532	1	-0.00359203917260078	-1	0.0741202564825999	0.0650649621768004	-0.0363386950224174	0.265620604486027	FALSE	rs61811438	1	FALSE	FALSE
ENSG00000124767.5	GLO1	9.68760588487973	6.87452041420808	-	6.0524226791875e-05	FALSE	TRUE	FALSE	FALSE	NA	-	-	0.96	0.590363188033107	0.257902309939382	0.773657834556768	0.0679486946369001	0	0.66275130642165	FALSE	FALSE	0	0	0.337699442333756	FALSE	0.324868018894137	1	0.0342317843461317	1	1	-0.770426731736373	1	0.163260062345959	0.0467365084251178	0.496525154325097	FALSE	rs11757846	1	FALSE	FALSE
ENSG00000133808.4	MICALCL	0.950954902531277	0.163346346158353	+	6.05302775241298e-05	TRUE	FALSE	FALSE	FALSE	NA	-	+	0.00139	0.515833055502932	0	0.701675356217882	0.525709659824879	0	0.758679805022815	FALSE	FALSE	0.594375952043254	0.0181335314079352	0.797619472303793	TRUE	0.240566824117811	0.107966962165044	-0.103042004076428	1	0.00207918415968347	0.00120961721583558	1	0.384748505957553	0.124627192518289	0.639780539239995	FALSE	rs4909978	1	FALSE	FALSE
ENSG00000073578.11	SDHA	8.23675982833372	2.51918754071123	+	6.07868462164632e-05	TRUE	FALSE	FALSE	FALSE	NA	+	+	0.0347	0.140733188454403	0	0.63659144337529	0	0	0.436701020543501	FALSE	FALSE	0.252713053874304	0	0.773552457851736	FALSE	0.811058627396499	1	0.551797469215379	1	1	0.00385386186620792	1	0.627312889160109	0.592961406714823	0.831854050802999	FALSE	rs11133994	1	FALSE	FALSE
ENSG00000109220.6	CHIC2	15.7895593559451	9.3531471731045	-	6.08350980704568e-05	FALSE	TRUE	FALSE	FALSE	NA	-	+	0.373	0.120118834580961	0	0.66331426193073	0.0234243829717855	0	0.646952744853404	FALSE	FALSE	0	0	0.6825876149799	FALSE	0.279021950541817	1	1	1	-1	-1	1	0.300608790781166	0.189175359011031	0.603573229033006	FALSE	rs10009315	1	FALSE	FALSE
ENSG00000112473.11	SLC39A7	23.4998275193798	11.9659081150763	+	6.11811311345819e-05	TRUE	FALSE	FALSE	FALSE	NA	+	+	0.0707	0.0513853538284529	0	0.551767603334303	0	0	0.654334639650769	FALSE	FALSE	0	0	0.659816640021614	FALSE	0.310475131981106	0.254887262894496	-0.950269064669576	1	0.566208583920156	0.00235962806889057	1	0.224949606030144	0.105417648952859	0.674294999332592	FALSE	rs138522690	1	FALSE	FALSE
ENSG00000055950.12	MRPL43	8.19814277201346	2.97812920612041	-	6.13939881257448e-05	FALSE	TRUE	FALSE	FALSE	NA	-	-	0.00181	0.345715458320287	0.0190244320107801	0.525978267427928	0	0	0.0102831485002535	FALSE	FALSE	0.241291753543618	0	0.638127184748746	FALSE	0.432509030286191	-0.189909747824502	-1	1	1	-1	1	0.425604253326306	0.305264035600948	0.570688087352301	FALSE	rs79417103	1	FALSE	FALSE
ENSG00000241399.2	CD302	20.5853671059499	67.486224774264	-	6.14632612403965e-05	FALSE	TRUE	FALSE	FALSE	NA	-	NA	NA	0.0267241783572375	0	0.709566184282131	0.0632006673701984	0	0.683879542727985	FALSE	FALSE	0	0	0.325703286256548	FALSE	0.604001111419839	1	0.999747439292211	1	-0.117083360866289	-1	0.948502269839219	0.507627260969962	0.35483654589916	0.748829795514047	FALSE	rs1469348	1	FALSE	FALSE
ENSG00000243199.1	NA	19.3696956271577	51.9328030139416	-	6.15403767010942e-05	FALSE	TRUE	FALSE	FALSE	NA	-	NA	NA	0.503862183208222	0.00204961405988585	0.730707455264186	0	0	0.267961424602086	FALSE	FALSE	0.344420328751322	0	0.649868024094559	FALSE	0.180439010836343	-1	-1	1	-1	-1	1	0.14933045189237	0.00446168673297295	0.383992181066328	FALSE	rs28452563	1	FALSE	FALSE
ENSG00000067167.3	TRAM1	18.6165242561449	56.6425445738457	-	6.17883443047623e-05	FALSE	TRUE	FALSE	FALSE	NA	-	-	3.78e-06	0.150324443512295	0	0.815043556599152	0	0	0.372874183969927	FALSE	FALSE	0	0	0.304833274233558	FALSE	0.247290914142818	1	1	1	0.178591770263698	-1	1	0.0288531912997561	-0.0307886482061087	0.221585780989293	FALSE	rs10097419	1	FALSE	FALSE
ENSG00000127125.6	PPCS	9.16434930555556	2.92129331863299	-	6.2360207585041e-05	FALSE	TRUE	FALSE	FALSE	NA	-	+	0.277	0.258662654665053	0	0.734529204891985	0.118757774692933	0	0.559285825046326	FALSE	FALSE	0	0	0.545000132145296	FALSE	0.130091692136705	1	-1	1	-1	-1	0.270316911245218	0.21399740911252	0.125600955977135	0.472966190569706	FALSE	rs75570	0.955667229483182	TRUE	FALSE
ENSG00000165861.9	ZFYVE1	6.99916162856603	0.963056241002364	+	6.27145527290104e-05	TRUE	FALSE	FALSE	FALSE	NA	-	+	0.0257	0.109081596945314	0	0.570166392181898	0	0	0.571246294260787	FALSE	FALSE	0	0	0.0942600544768389	FALSE	0.384662406223951	1	0.0582961290807687	1	0.0469049200512696	-0.510854359463909	1	0.267971473801206	0.173372326534362	0.574338086634876	FALSE	rs2239228	1	FALSE	FALSE
ENSG00000137563.6	GGH	0.363072876602564	0.0637314319416741	-	6.27242363530394e-05	FALSE	TRUE	FALSE	FALSE	NA	-	-	0.151	0	0	0.41356476846687	0.228916999730808	0	0.642404577440921	FALSE	FALSE	0	0	0.0728759806134745	FALSE	0.239844401222562	1	1	1	-0.0234299545329766	0.00159780527403168	1	-0.121946434597023	-0.22969307129841	0.145292610249338	FALSE	rs10957210	1	FALSE	TRUE
ENSG00000265150.1	NA	1071.36733192568	206917.351082264	-	6.33292014135395e-05	FALSE	TRUE	FALSE	FALSE	NA	-	NA	NA	0.138111522578923	0	0.668548684234823	0	0	0.607003755815817	FALSE	FALSE	0.093045385315271	0	0.661373104336555	FALSE	0.346540705751598	1	1	1	-1	-1	0.341240093083714	0.153478388527161	-0.0759703290944862	0.491689922727557	FALSE	rs12435674	1	FALSE	FALSE
ENSG00000172586.7	CHCHD1	6.95269665766374	3.05757508799937	-	6.3391912958549e-05	FALSE	TRUE	FALSE	FALSE	NA	-	+	0.626	0.0466519469950516	0	0.626451973289474	0	0	0.399972140779968	FALSE	FALSE	0.206898358002701	0	0.736110902476907	FALSE	0.144651292025563	-1	-1	1	0.638074732123608	0.00305792578633356	1	0.035366686270176	-0.141588842242378	0.446139366186216	FALSE	rs4746158	1	FALSE	FALSE
ENSG00000114686.3	MRPL3	3.22448416016351	1.59678428013109	-	6.34263313442299e-05	FALSE	TRUE	FALSE	FALSE	NA	-	-	1.41e-13	0.570924213804641	0	0.742147984200117	0.0903454492639295	0	0.363481489160869	FALSE	FALSE	0.21878240541136	0	0.489429399211948	FALSE	0.174437343706585	-1	-1	1	-0.000661717055157978	-0.637080261473193	0.019481458782052	0.201450625879231	0.0268644771856145	0.405737391949741	FALSE	rs7610352	1	FALSE	FALSE
ENSG00000196914.4	ARHGEF12	0.452467465536198	0.032201232087138	+	6.48318352069289e-05	TRUE	FALSE	FALSE	FALSE	NA	-	+	0.186	0.214944076403597	0	0.610922491358896	0.791494480884498	0.596528104990184	0.885221180190411	TRUE	FALSE	0.295175396150205	0	0.759285852121726	FALSE	0.253237010280634	0.530545702061377	0.441817442122	1	1	-0.000783644528466047	1	0.156518102176977	0.0450112063055283	0.455966629627502	FALSE	rs608154	1	FALSE	FALSE
ENSG00000137076.12	TLN1	112.533840001996	763.660821962907	+	6.50610370506979e-05	TRUE	FALSE	FALSE	FALSE	NA	+	+	3.75e-07	0.331595123775438	0	0.735747066682312	0.0602236032205862	0	0.560407066125683	FALSE	FALSE	0	0	0.336433874823846	FALSE	0.372158933036955	1	1	1	-1	-1	1	0.0616914004103372	-0.0660296381237677	0.356361357485413	FALSE	rs62541982	1	FALSE	FALSE
ENSG00000014216.10	CAPN1	26.3503285695469	21.3991173254658	+	6.5066976666945e-05	TRUE	FALSE	FALSE	FALSE	NA	+	+	8.95e-08	0	0	0.644200268149931	0	0	0.582756534414242	FALSE	FALSE	0	0	0.0410049242506046	FALSE	0.55265351486524	1	0.997280019058862	1	0.790652520274121	0.188186484104171	1	0.107185982213929	-0.00978470927614	0.379150558456166	FALSE	rs12146493	1	FALSE	FALSE
ENSG00000117139.11	KDM5B	4.3851523650863	0.819447203760083	+	6.52467175092592e-05	TRUE	FALSE	FALSE	FALSE	NA	+	+	0.872	0.234676973012903	0	0.721606346547488	0.630909532751944	0	0.802172388940028	FALSE	FALSE	0	0	0.428729317919147	FALSE	0.267518755209781	1	0.782836171943133	1	-1	-1	1	-0.250850712364462	-0.324079171850661	0.233004198723245	FALSE	rs11810295	1	FALSE	FALSE
ENSG00000156599.6	ZDHHC5	19.1597752539243	7.02163431931355	+	6.52704134266953e-05	TRUE	FALSE	FALSE	FALSE	NA	+	+	0.969	0.0380888043120962	0	0.70109446930861	0.0431449126303517	0	0.609864911907712	FALSE	FALSE	0	0	0.194095730753774	FALSE	0.369991664351209	1	1	1	0.978068290998482	-1	1	-0.361215710660975	-0.433127745395347	-0.051844606463802	FALSE	rs4529894	1	FALSE	FALSE
ENSG00000167323.5	STIM1	16.1964896263267	7.06085949493204	+	6.56621264028103e-05	TRUE	FALSE	FALSE	FALSE	NA	+	+	0.0336	0	0	0.522527396092705	0	0	0.477941705033311	FALSE	FALSE	0	0	0	FALSE	0.345707140872465	1	0.962544451300858	1	0.672393488330052	0.00619403529059049	1	0.0318241195299274	-0.112142000854788	0.322090581062715	FALSE	rs2566234	1	FALSE	FALSE
ENSG00000147669.6	POLR2K	0.848295447892272	1.2691643012845	-	6.57259591360726e-05	FALSE	TRUE	FALSE	FALSE	NA	-	+	0.0392	0	0	0.39614889906194	0	0	0.163752223624288	FALSE	FALSE	0	0	0.682134315116057	FALSE	0.294804112253404	0.965489343649112	-0.996399420456423	1	-1	-1	1	-0.0190098922913035	-0.133068763839794	0.252394312814947	FALSE	rs2084556	1	FALSE	FALSE
ENSG00000175538.6	KCNE3	27.0366944293108	36.267935848485	-	6.60260183420014e-05	FALSE	TRUE	FALSE	FALSE	NA	-	+	0.0067	0.403547290141662	0	0.618525668920725	0	0	0.608474755134362	FALSE	FALSE	0	0	0.615877546554564	FALSE	0.530369547096416	1	0.522711844153762	1	1	-0.341718129630349	1	0.686540454670132	0.637750895330312	0.804969178649612	FALSE	rs3853688	1	TRUE	FALSE
ENSG00000226312.3	CFLAR-AS1	11.4794275586185	9.54773092958876	+	6.6114293927055e-05	TRUE	FALSE	FALSE	FALSE	NA	+	NA	NA	0.532859318020243	0.173903616649768	0.711098542486947	0.0875786702227312	0	0.47096731982699	FALSE	FALSE	0.138736283149532	0	0.531036950987097	FALSE	0.482634065018061	1	1	1	-0.00396996997297101	-0.477080112399833	1	0.239369337668842	0.158520265180734	0.532206748543447	FALSE	rs7580858	1	FALSE	FALSE
ENSG00000133731.5	IMPA1	1.48990871089536	0.860587573968023	-	6.63580056142831e-05	FALSE	TRUE	FALSE	FALSE	NA	-	-	0.144	0.472612289020957	0	0.755598008368797	0.464608476703799	0	0.758871729829654	FALSE	FALSE	0	0	0.304040167008659	FALSE	0.317143651014171	1	1	1	-1	-1	1	-0.0882724018813251	-0.226093833499588	0.276743817545042	FALSE	rs1026830	1	FALSE	FALSE
ENSG00000198888.2	MT-ND1	2122.41831348168	544733.403378866	-	6.64142283026926e-05	FALSE	TRUE	FALSE	FALSE	NA	-	NA	NA	0.113268644346708	0	0.410473733630429	0	0	0.561752388798827	FALSE	FALSE	0	0	0.380511185511212	FALSE	0.101472631286468	1	-0.976383612323286	1	-1	-1	1	0.245388596640184	0.121566096634368	0.47979465122243	FALSE	NA	NA	FALSE	FALSE
ENSG00000159840.11	ZYX	318.148725907519	7866.03324576554	+	6.65615963995245e-05	TRUE	FALSE	FALSE	FALSE	NA	+	+	0.000653	0.587447299017146	0.121898813690693	0.801900017634627	0.452463211728754	0	0.653378881226906	FALSE	FALSE	0	0	0.304587125347009	FALSE	0.584551264240067	1	1	1	-0.0166530602394837	-0.00408325564386132	1	-0.15482875809182	-0.253260537206981	0.255678012098979	FALSE	rs2189876	1	FALSE	FALSE
ENSG00000173473.6	SMARCC1	8.85130659030544	3.70659211547725	+	6.66594287597438e-05	TRUE	FALSE	FALSE	FALSE	NA	+	-	9.31e-09	0	0	0.0457045033895637	0.149036974821795	0	0.726688741697466	FALSE	FALSE	0	0	0	FALSE	0.284078910808558	1	0.406234325922864	1	0.149123557937041	-0.451598165460332	0.502282725412232	0.341667137436631	0.259267738166828	0.491403977884374	FALSE	rs2267844	1	FALSE	FALSE
ENSG00000177628.9	GBA	9.78927331349206	3.73624829206779	+	6.67417619698014e-05	TRUE	FALSE	FALSE	FALSE	NA	+	+	2.31e-12	0	0	0.673771014029062	0.454332170994488	0	0.677951648528173	FALSE	FALSE	0	0	0.539907958570569	FALSE	0.24734648513476	1	0.857835637596732	1	-1	-1	1	-0.151057479690071	-0.244037570020639	0.328557958805487	FALSE	rs2878412	1	FALSE	FALSE
ENSG00000245904.2	NA	3.46779299030825	0.855961730779974	-	6.69906388723571e-05	FALSE	TRUE	FALSE	FALSE	NA	-	NA	NA	0.506838736998166	0	0.742314566854137	0.514887376309532	0	0.757383203985034	FALSE	FALSE	0.0415598169215535	0	0.655290274275704	FALSE	0.126257293692692	0.294374413052838	0.285374384420851	1	-0.0047988065802291	-1	1	-0.14434793596196	-0.432028177407779	0.355458816343274	FALSE	rs10745626	1	TRUE	FALSE
ENSG00000124562.5	SNRPC	19.3331697834646	19.9696941962648	-	6.82749592105792e-05	FALSE	TRUE	FALSE	FALSE	NA	-	-	0.111	0.474387860207481	0.0270158369947855	0.583275489427475	0	0	0.330909020757589	FALSE	FALSE	0	0	0.168232985418657	FALSE	0.314309530425118	-0.258207091353253	-0.999813797644859	1	-1	-1	1	0.433365868853133	0.328130367447776	0.601558960270641	FALSE	rs4713677	1	FALSE	FALSE
ENSG00000228839.1	PIK3IP1-AS1	1.14178150242326	0.349541032884986	+	6.91519790966218e-05	TRUE	FALSE	FALSE	FALSE	NA	-	NA	NA	0.238639043009769	0	0.379783102229575	0	0	0.370562246204566	FALSE	FALSE	0	0	0.266256039747061	FALSE	-0.059016393442623	1	0.583833249412368	1	0.000840442749554549	-0.00243069338262737	1	-0.30595622283879	-0.364536319545602	-0.0666263648532651	FALSE	rs9608940	1	FALSE	FALSE
ENSG00000102181.15	CD99L2	6.89961328466515	1.23419353674049	+	6.93079178425639e-05	TRUE	FALSE	FALSE	FALSE	NA	+	-	0.268	0.0858386120028178	0	0.638267250698041	0	0	0.371715656403383	FALSE	FALSE	0	0	0.120086059343563	FALSE	0.419560989163657	1	0.338811951636418	1	0.349134678926401	-1	1	0.302160296572738	0.193087369721176	0.605619833168408	FALSE	NA	NA	FALSE	FALSE
ENSG00000158092.2	NCK1	3.59028357757462	1.27690725221499	-	6.93561065949366e-05	FALSE	TRUE	FALSE	FALSE	NA	-	-	0.087	0.596087461946514	0.22563690327012	0.811551697482553	0.0459265568321842	0	0.705004475790348	FALSE	FALSE	0.0971988095952975	0	0.730709123387315	FALSE	0.23601000277855	1	0.691190509965489	1	-1	-1	1	0.0360978209708274	-0.116564606814788	0.398921822016605	FALSE	rs9811261	1	FALSE	FALSE
ENSG00000186591.7	UBE2H	14.440318610937	5.5891192092988	+	6.95552501182391e-05	TRUE	FALSE	FALSE	FALSE	NA	-	+	0.343	0.505917346249515	0.0227132954845265	0.770869657298504	0.361267107697173	0	0.797511349061241	FALSE	FALSE	0.175727708873746	0	0.725741405626784	FALSE	0.435454292859128	1	0.950535685536357	1	-1	-1	0.463834929224321	0.0433749753000387	-0.0183092437928321	0.386292587245318	FALSE	rs62491532	1	FALSE	FALSE
ENSG00000143499.9	SMYD2	2.9713850020517	0.807536926331093	-	6.96832925925632e-05	FALSE	TRUE	FALSE	FALSE	NA	-	-	0.0144	0.203511478493342	0	0.671102937217897	0.335940273943341	0	0.564657855759676	FALSE	FALSE	0	0	0.088150170425408	FALSE	0.317810502917477	1	1	1	-0.000478445564866361	0.0021872960503269	1	-0.207214593752362	-0.288205368168609	0.0514697141110801	FALSE	rs2809589	1	FALSE	FALSE
ENSG00000198755.6	RPL10A	152.761459195594	2777.69536896349	-	6.97800698499749e-05	FALSE	TRUE	FALSE	FALSE	NA	-	NA	NA	0.664021857958986	0.119938645758774	0.756248888056116	0	0	0.540974717422904	FALSE	FALSE	0.0357891181794753	0	0.601216074658666	FALSE	0.296915809947208	1	-0.985450894621019	1	-1	-1	-0.00464154240719327	0.301935582698757	0.0778214644945384	0.542699495972049	FALSE	rs7741666	1	FALSE	FALSE
ENSG00000114391.8	RPL24	19.2939857222844	82.000068802778	-	7.05322407111316e-05	FALSE	TRUE	FALSE	FALSE	NA	-	-	1.44e-05	0.699510884286854	0.270586973332365	0.810456524907689	0	0	0.599597205400635	FALSE	TRUE	0	0	0.107696472150991	FALSE	0.132925812725757	1	-0.955405173653426	1	-1	-1	-0.00664337467186465	0.17765874559484	0.0555648221875204	0.467212563841357	FALSE	rs58261173	1	FALSE	FALSE
ENSG00000155093.13	PTPRN2	1.94228464042157	1.02142174276962	-	7.10478155563764e-05	FALSE	TRUE	FALSE	FALSE	NA	+	+	0.0057	0.298806076438128	0	0.691594658742934	0.904365983962031	0.511938225837862	0.945021695722392	TRUE	FALSE	0	0	0.429240986088837	FALSE	0.718588496804668	1	1	1	0.745848934282269	-1	1	0.269137551447229	0.128586515453393	0.593173728766429	FALSE	rs10271690	1	FALSE	FALSE
ENSG00000224650.2	IGHV3-74	3.19701923076923	14.9935559002936	+	7.165381190623e-05	TRUE	FALSE	FALSE	FALSE	NA	-	NA	NA	0.271760538676353	0	0.490378452300537	0.336152032156292	0	0.556270653236281	FALSE	FALSE	0	0	0.194406421692249	FALSE	0.250569602667408	1	1	1	0.00479654375398046	0.00349733658260646	0.0122357992566523	0.0250765663928189	-0.0744002102283751	0.337636361695564	FALSE	rs10144801	1	FALSE	TRUE
ENSG00000123268.4	ATF1	3.25615158330335	1.71861903713073	-	7.19496531381726e-05	FALSE	TRUE	FALSE	FALSE	NA	-	-	0.734	0.602796972490959	0	0.795758899932159	0.0172147476446045	0	0.639203877024186	FALSE	FALSE	0	0	0.338154843549859	FALSE	0.189274798555154	1	1	1	0.221398635045877	-1	1	0.0820214856087541	-0.0235655970936604	0.371198629602294	FALSE	rs12829524	1	FALSE	FALSE
ENSG00000151131.5	C12orf45	1.46058586036671	0.298041911266031	-	7.19820063485903e-05	FALSE	TRUE	FALSE	FALSE	NA	-	NA	NA	0.497689406685422	0.134769123186209	0.721314527191971	0.317987861855269	0	0.649647264677422	FALSE	FALSE	0.546017348805655	0	0.694065848855356	FALSE	0.102472909141428	-0.982624136943724	-1	1	-1	-1	0.139939255600025	0.263635950462068	0.131947108244068	0.496464387137765	FALSE	rs7958715	1	FALSE	FALSE
ENSG00000132963.7	POMP	13.7382163089374	18.2576879498867	-	7.23712355882611e-05	FALSE	TRUE	FALSE	FALSE	NA	-	+	0.0136	0.66424014677345	0	0.815119419453648	0	0	0.565363809373252	FALSE	FALSE	0.142261407159167	0	0.645354539362128	FALSE	0.0925812725757155	1	0.702341289679982	1	-1	-1	-0.0098122700370095	-0.0396688802929497	-0.172265322767761	0.36893652593485	FALSE	rs35158367	1	TRUE	FALSE
ENSG00000168028.8	RPSA	37.3132291938855	172.34758026096	-	7.27925029040859e-05	FALSE	TRUE	FALSE	FALSE	NA	-	-	7.35e-09	0.569611646878417	0	0.709308511167432	0	0	0.533111294303619	FALSE	FALSE	0	0	0.599152831586199	FALSE	0.337704918032787	1	-0.315692617536766	1	-1	-1	1	0.0697503173606989	-0.0737621715562311	0.460054081072186	FALSE	rs11923194	1	FALSE	FALSE
ENSG00000257499.1	NA	12.2742369688385	6.89223052572349	+	7.32979132961167e-05	TRUE	FALSE	FALSE	FALSE	NA	+	NA	NA	0	0	0.244362852463243	0.177823097845119	0	0.698620605237954	FALSE	FALSE	0	0	0.346051428544635	FALSE	0.288357877188108	1	0.577881644425224	1	-0.147576750576514	-1	1	0.380024007382021	0.272831749041763	0.551398949028245	FALSE	rs12368412	1	FALSE	FALSE
ENSG00000132388.8	UBE2G1	9.84051156181015	4.55232602487395	-	7.36209101992392e-05	FALSE	TRUE	FALSE	FALSE	NA	-	-	1.03e-05	0.159841306080363	0	0.769995040987858	0.426473455961549	0	0.794631021713289	FALSE	FALSE	0	0	0.277005049546704	FALSE	0.343984440122256	1	0.652504147412024	1	0.577963750964258	0.470804636577729	1	0.0770899439094835	0.0265547710880099	0.351158921725377	FALSE	rs238233	1	FALSE	FALSE
ENSG00000234981.1	NA	1.97052749683944	8.22864555501542	-	7.38787317797257e-05	FALSE	TRUE	FALSE	FALSE	NA	+	NA	NA	0.146856693425121	0	0.545452569166663	0.704042098193557	0	0.834307159134492	FALSE	FALSE	0	0	0.412649201408412	FALSE	0.478910808557933	1	0.868117659012414	1	0.98467533303928	-0.0105506988188441	1	-0.0384323676775158	-0.176163793851967	0.368543633041517	FALSE	rs1567190	1	FALSE	FALSE
ENSG00000256428.1	NA	24.0358601255459	48.7603633974026	-	7.4259569394974e-05	FALSE	TRUE	FALSE	FALSE	NA	-	NA	NA	0.584532759009336	0	0.782519350518882	0	0	0.175398717991177	FALSE	FALSE	0	0	0.341667526702485	FALSE	0.252070019449847	1	-0.857935144238098	1	-1	-1	-0.290366624830383	0.267288211185948	0.0506088615250513	0.534611108318977	FALSE	rs11230985	1	FALSE	FALSE
ENSG00000163545.7	NUAK2	54.2595096748087	80.4936028816148	+	7.42811965461457e-05	TRUE	FALSE	FALSE	FALSE	NA	-	-	0.448	0.781460437982245	0.335624313149438	0.915349541239123	0.409995402079196	0	0.689421226023497	FALSE	FALSE	0.143736494958983	0	0.590529677101366	FALSE	0.645068074465129	1	0.914266407803326	1	0.458422410515371	-0.0303750409085646	1	0.135667397834429	0.0151722606627495	0.545757406425121	FALSE	rs3738154	1	FALSE	FALSE
ENSG00000137878.12	GCOM1	0.714036835996176	0.144151115237555	-	7.48223801938402e-05	FALSE	TRUE	FALSE	FALSE	NA	-	-	0.00201	0.594414421157589	0	0.863463483741869	0	0	0.557538552101543	FALSE	FALSE	0	0	0	FALSE	0.408391219783273	1	1	1	-1	-1	1	0.195760284635864	0.117810779540818	0.496106296437802	FALSE	rs935210	1	FALSE	FALSE
ENSG00000100342.16	APOL1	23.0313744659641	86.7203737355944	+	7.50486502139857e-05	TRUE	FALSE	FALSE	FALSE	NA	+	+	0.000229	0	0	0.315018575141222	0	0	0.428786531710782	FALSE	FALSE	0.25236458133977	0	0.558572048406446	FALSE	0.642345095859961	0.672776086271005	0.82183306320849	1	0.689539660855066	0.555367707737507	1	0.330250045165723	0.134159381358314	0.632216756936225	FALSE	rs5756047	1	FALSE	FALSE
ENSG00000136527.13	TRA2B	5.57620503826531	2.1698917021	-	7.58733655998202e-05	FALSE	TRUE	FALSE	FALSE	NA	-	-	2.85e-06	0.672373332792771	0	0.825200808898473	0	0	0.596652947104467	FALSE	FALSE	0	0	0.586918893312158	FALSE	0.416282300639066	1	1	1	-1	-1	1	0.145700660480651	0.0794141884410098	0.390002214049148	FALSE	rs17293846	1	FALSE	FALSE
ENSG00000173867.7	NA	4.63389562289562	2.78140441499529	-	7.62668707630957e-05	FALSE	TRUE	FALSE	FALSE	NA	-	NA	NA	0.42726470056025	0	0.683436192218345	0	0	0.377598956517997	FALSE	FALSE	0.264656022141812	0	0.507357974977031	FALSE	0.279466518477355	1	-1	1	1	0.000670570262875439	1	0.0856640277897276	-0.0542757899301403	0.314536073006026	FALSE	rs4887326	1	FALSE	FALSE
ENSG00000268400.1	NA	115.461961203704	428.466575464021	+	7.64549389059321e-05	TRUE	FALSE	FALSE	FALSE	NA	+	NA	NA	0.49480410395122	0	0.758668248782831	0	0	0.528540905596192	FALSE	FALSE	0	0	0.288275176860976	FALSE	0.427507641011392	1	1	1	-0.011754121347506	-0.000861784914702723	1	-0.272847029748647	-0.347605236718187	-0.00735059988046282	FALSE	rs36258	1	FALSE	FALSE
ENSG00000232810.3	TNF	5.71463733552632	1.70758213559391	-	7.64656806357895e-05	FALSE	TRUE	FALSE	FALSE	NA	-	+	6.14e-07	0.265560529016388	0	0.630289602912292	0	0	0.13781446235891	FALSE	FALSE	0	0	0	FALSE	0.409447068630175	1	1	1	0.00402939579877241	0.00436681820271642	1	0.242376457720094	0.172467568121403	0.488693671594941	FALSE	rs114151046	1	FALSE	FALSE
ENSG00000140990.10	NDUFB10	38.467000585206	92.3005476410824	-	7.66715952829051e-05	FALSE	TRUE	FALSE	FALSE	NA	+	+	0.00407	0.450497497222755	0	0.708141061743379	0.25979168203967	0	0.83439560641399	FALSE	FALSE	0.697977749473965	0.0821854417248757	0.88590111913461	TRUE	0.248457904973604	-0.213316449630908	-1	1	-1	-1	1	0.661698707453027	0.51526251127803	0.838537625272557	FALSE	rs2038128	1	FALSE	FALSE
ENSG00000100280.12	AP1B1	17.2060102471256	10.8376483939392	+	7.66765912142473e-05	TRUE	FALSE	FALSE	FALSE	NA	+	+	0.0215	0	0	0.0910092888101406	0	0	0.28270186943414	FALSE	FALSE	0	0	0	FALSE	0.670686301750486	0.991099317106584	0.779548202537219	1	1	0.00733968324770123	1	0.390076327294637	0.315361456826662	0.626965234321775	FALSE	rs9537	1	FALSE	FALSE
ENSG00000130726.7	TRIM28	55.2725019900497	116.759935643244	+	7.69598647180927e-05	TRUE	FALSE	FALSE	FALSE	NA	+	-	2.35e-12	0	0	0.307481786656065	0	0	0.472267832015009	FALSE	FALSE	0	0	0.742118774104716	FALSE	0.595998888580161	0.464551860910007	-0.410770498769421	1	0.383896432851924	0.0531904382390657	1	0.61809517167204	0.559477094044361	0.799104250127635	FALSE	rs10853903	1	FALSE	FALSE
ENSG00000259399.1	TGIF2-C20orf24	90.9348874589266	506.192076658196	-	7.76299384464423e-05	FALSE	TRUE	FALSE	FALSE	NA	-	NA	NA	0	0	0.571339118031363	0.00723306171501755	0	0.546362963317838	FALSE	FALSE	0	0	0.318471271130317	FALSE	0.199166435120867	1	0.131786548705871	1	0.0767108304967006	-1	1	0.268249040194669	0.188013778232276	0.579753777966494	FALSE	rs1146265	1	FALSE	FALSE
ENSG00000218426.5	NA	207.40844955157	5905.49012847536	-	7.76945796347906e-05	FALSE	TRUE	FALSE	FALSE	NA	-	NA	NA	0.745232979552097	0.29294113615807	0.817893138278703	0	0	0.28411594820443	FALSE	TRUE	0.191034727641499	0	0.746301829737966	FALSE	0.161822728535704	1	-1	1	-1	-1	1	0.28660631965303	0.149019062085538	0.554710216337781	FALSE	rs2306916	1	FALSE	FALSE
ENSG00000134001.8	EIF2S1	3.2684610067352	0.782071302830578	-	7.90054768720514e-05	FALSE	TRUE	FALSE	FALSE	NA	-	-	0.000682	0.471058501519602	0	0.686716185254452	0	0	0.54770245976052	FALSE	FALSE	0.351716727493117	0	0.580574409740464	FALSE	0.202834120589053	1	-0.239860395107607	1	-1	-1	1	0.128450952701031	0.019779357960885	0.397861355262009	FALSE	rs72721039	1	FALSE	FALSE
ENSG00000138085.11	ATRAID	20.5942189985089	18.1739167023831	-	7.91066479276322e-05	FALSE	TRUE	FALSE	FALSE	NA	+	+	0.081	0.612187122678617	0	0.705202925801088	0	0	0.565997819479229	FALSE	FALSE	0.181217961050129	0	0.707682153403251	FALSE	0.286968602389553	1	-0.0845638158037273	1	-1	-1	1	0.318749349822095	0.186757807161501	0.677787146766396	FALSE	rs7568529	1	FALSE	FALSE
ENSG00000065970.4	FOXJ2	8.24719125954806	2.14311143906268	+	7.95985841921097e-05	TRUE	FALSE	FALSE	FALSE	NA	+	-	0.067	0.109850450277642	0	0.638208149311897	0.396614832002465	0	0.812182914629571	FALSE	FALSE	0	0	0.5897811145308	FALSE	0.273742706307308	1	1	1	-0.39027481036851	-1	1	-0.0470066320004745	-0.185014069056442	0.306436071950345	FALSE	rs741361	1	FALSE	FALSE
ENSG00000127314.12	RAP1B	4.90347773941894	3.59065779250572	-	7.96124963164703e-05	FALSE	TRUE	FALSE	FALSE	NA	-	+	0.321	0.377932578830332	0	0.799166129937168	0.136081348809852	0	0.686091967405	FALSE	FALSE	0	0	0.10079213820865	FALSE	0.205001389274799	1	1	1	-0.405380028579648	-1	1	-0.263354457384133	-0.387095252609871	0.0413381930577419	FALSE	rs7134731	1	FALSE	FALSE
ENSG00000255114.1	NA	9.64519868421053	7.8809194509996	+	7.96472663569098e-05	TRUE	FALSE	FALSE	FALSE	NA	+	NA	NA	0	0	0.531511906283528	0	0	0.275342325127513	FALSE	FALSE	0.341188342536666	0	0.636648780051215	FALSE	0.263573214781884	-1	-1	1	0.0238134729553528	-0.0245275193752144	1	0.536475600762949	0.404140146572343	0.679659188522199	FALSE	rs11217070	1	TRUE	FALSE
ENSG00000170779.10	CDCA4	3.19878778375149	0.709956321877199	-	7.9809525825079e-05	FALSE	TRUE	FALSE	FALSE	NA	-	+	0.469	0.210653046807993	0	0.421704858537956	0.0486568077345215	0	0.450547193460475	FALSE	FALSE	0	0	0.168189371989279	FALSE	0.498860794665185	1	0.968299508898154	1	-0.0106157731866406	0.00235105154755185	1	0.237678171980376	0.210917278221676	0.461623491412655	FALSE	rs1770983	1	FALSE	FALSE
ENSG00000123908.7	AGO2	4.45634975010412	0.833076959041188	+	8.00778021518061e-05	TRUE	FALSE	FALSE	FALSE	NA	-	+	0.626	0.634656482786678	0.187234159687545	0.794138383233439	0	0	0.470729346992906	FALSE	TRUE	0.237144428307688	0	0.687071448914396	FALSE	0.260183384273409	1	1	1	1	-1	1	0.231570063058198	0.102302206202965	0.511013041849369	FALSE	rs11776034	1	FALSE	FALSE
ENSG00000169019.9	COMMD8	1.34896025754885	2.63730143368669	-	8.01365030678877e-05	FALSE	TRUE	FALSE	FALSE	NA	-	+	0.403	0	0	0.239042150331146	0	0	0.515786104025156	FALSE	FALSE	0	0	0.245230941851871	FALSE	0.315921089191442	1	0.992417431094685	1	-1	-1	1	0.0470573677873517	-0.0538346672992893	0.478291578521794	FALSE	rs4129828	1	FALSE	FALSE
ENSG00000005059.11	MCUB	9.19200658821872	6.09548246348194	-	8.05706859890745e-05	FALSE	TRUE	FALSE	FALSE	NA	-	-	1.16e-21	0.589271123042734	0.155037459198121	0.741609377401813	0	0	0.415508932337517	FALSE	TRUE	0	0	0.20159691804658	FALSE	0.252181161433732	1	1	1	0.000548704706812358	-0.00101010670861076	1	0.123741516692992	-0.00440619018217521	0.365799181050118	FALSE	rs2526434	1	FALSE	FALSE
ENSG00000178741.7	COX5A	21.4855961743772	23.3066189745581	-	8.07485241079227e-05	FALSE	TRUE	FALSE	FALSE	NA	-	-	0.0139	0.460811685882265	0	0.64879285378053	0	0	0.300970643284683	FALSE	FALSE	0	0	0.494105525957832	FALSE	0.35037510419561	1	-1	1	-1	-1	1	0.29087273135444	0.15345084323214	0.618392572471371	FALSE	rs3522	1	FALSE	FALSE
ENSG00000156976.10	EIF4A2	17.8288556516066	41.1953420587842	-	8.08888118359197e-05	FALSE	TRUE	FALSE	FALSE	NA	-	-	8.05e-18	0.231945812883289	0	0.674761219072185	0	0	0.653771952217483	FALSE	FALSE	0	0	0.533882625897387	FALSE	0.18866351764379	1	0.990611197694929	1	-0.415628069100079	-1	1	-0.0133880049271904	-0.0990267726410671	0.276601815483617	FALSE	rs13089323	1	FALSE	FALSE
ENSG00000146729.5	GBAS	2.8521028068464	0.809695970862993	-	8.13156667378587e-05	FALSE	TRUE	FALSE	FALSE	NA	-	-	0.729	0.335263986749628	0	0.761926387265986	0.154935508445659	0	0.599620267357033	FALSE	FALSE	0	0	0.549962692705739	FALSE	0.174159488746874	1	0.217426031824828	1	-1	-1	1	0.0364356495665373	-0.0760626677386051	0.362664353072683	FALSE	rs6955435	1	FALSE	FALSE
ENSG00000163166.9	IWS1	10.6741395465995	3.24034715003886	+	8.15752848576629e-05	TRUE	FALSE	FALSE	FALSE	NA	+	-	0.000192	0.0711575306296027	0	0.55545235062696	0	0	0.43806472832299	FALSE	FALSE	0.60602894554435	0.0236260468852952	0.863566856640335	TRUE	0.457904973603779	-0.300063774601774	-1	0.970701051494878	-0.662536480249025	0.00710170681332086	1	0.572061282962763	0.416105903749513	0.85086195084907	TRUE	rs4533428	1	FALSE	FALSE
ENSG00000258289.2	CHURC1	6.71944822966507	14.7803774054952	-	8.47991880642623e-05	FALSE	TRUE	FALSE	FALSE	NA	-	-	0.0281	0.158198451114704	0	0.736066335589213	0.378141010123393	0	0.707660892144049	FALSE	FALSE	0	0	0	FALSE	0.567824395665463	1	1	1	1	-1	1	-0.0783403709849806	-0.270339352286094	0.22879899811628	FALSE	rs72712499	1	FALSE	FALSE
ENSG00000164597.7	COG5	6.7939869911558	1.88724998057044	-	8.48213490940334e-05	FALSE	TRUE	FALSE	FALSE	NA	-	-	0.104	0.41878466599962	0	0.749366139948119	0.468495878654609	0	0.725998517677699	FALSE	FALSE	0.378625214716095	0	0.570474535627502	FALSE	0.267518755209781	0.676303057648267	0.616443981835223	1	0.275276781929376	-1	1	-0.00229969423247317	-0.125496592796403	0.30999136930045	FALSE	rs75720484	1	FALSE	FALSE
ENSG00000156709.9	AIFM1	6.1564020979021	1.38521351046597	+	8.52749603809554e-05	TRUE	FALSE	FALSE	FALSE	NA	+	-	0.00032	0	0	0.514659313270927	0	0	0.262232020713491	FALSE	FALSE	0	0	0.210338506097681	FALSE	0.525034731869964	0.95548528565057	0.18666218151624	1	1	0.00428391850679944	1	0.234404595537882	0.15008954782558	0.43642818724412	FALSE	NA	NA	FALSE	FALSE
ENSG00000092847.6	AGO1	5.78913003264418	0.953100368145287	+	8.67591940685243e-05	TRUE	FALSE	FALSE	FALSE	NA	+	+	0.506	0.209637127119836	0	0.705717342151425	0.0691799919821148	0	0.774247056354529	FALSE	FALSE	0	0	0.73368297904174	FALSE	0.236843567657683	1	0.390041728182047	1	-0.642028127713853	-1	1	-0.0669961044323531	-0.175782849475768	0.381526582384735	FALSE	rs76248101	1	FALSE	FALSE
ENSG00000119392.10	GLE1	13.9567388888889	3.90994824325525	+	8.68517624470523e-05	TRUE	FALSE	FALSE	FALSE	NA	+	+	0.322	0	0	0.61022814371385	0.686669575982312	0.13981815101721	0.823645104130782	FALSE	FALSE	0.276351352446874	0	0.781398121668244	FALSE	0.0288969158099472	-1	-1	1	1	-0.000136053514425455	1	-0.0221512790096205	-0.302731085334413	0.585317496374853	FALSE	rs10988209	1	FALSE	FALSE
ENSG00000188315.3	C3orf62	14.2644917359667	8.35004698306068	+	8.68528675198876e-05	TRUE	FALSE	FALSE	FALSE	NA	+	+	1.55e-08	0.449716521972655	0.0239562124165399	0.693714941607412	0.28991107862483	0	0.685110248093267	FALSE	FALSE	0.0286466073922876	0	0.623986010464052	FALSE	0.375882189497083	1	1	1	1	0.000644783814346062	1	0.201023302242249	0.109050570654655	0.570623927806305	FALSE	rs1134043	1	FALSE	FALSE
ENSG00000103184.7	SEC14L5	0.183823730846618	0.0257564589792433	+	8.77618563332688e-05	TRUE	FALSE	FALSE	FALSE	NA	-	+	9.8e-08	0.299982008698975	0	0.686691456178041	0.565403301293156	0	0.760205613294182	FALSE	FALSE	0	0	0.533326616665682	FALSE	0.591164212281189	1	0.880709521255645	1	1	0.0045500654313037	1	0.446440721592085	0.314059261734041	0.664962296250574	FALSE	rs9923892	1	FALSE	FALSE
ENSG00000117523.11	PRRC2C	9.75024043759271	8.64367647170874	+	8.79993901470002e-05	TRUE	FALSE	FALSE	FALSE	NA	+	-	6.55e-07	0	0	0.44687107754143	0.283968895187743	0	0.791676099792525	FALSE	FALSE	0.120407212086963	0	0.61353372236967	FALSE	0.123145318143929	1	0.394957762302445	1	-0.41682454142027	-1	1	0.118307812173624	-0.0135875619674746	0.609012096611801	FALSE	rs2224396	1	FALSE	FALSE
ENSG00000115738.5	ID2	24.1068396022727	50.7164272781238	-	8.81724130325619e-05	FALSE	TRUE	FALSE	FALSE	NA	-	+	7.58e-19	0.689971691582505	0.215408836192691	0.84844970172976	0.413713776243764	0	0.670511400050081	FALSE	FALSE	0.220748825677585	0	0.701904208904347	FALSE	0.41839399833287	0.619705154249834	0.472960383073844	1	-1	-1	1	0.44596070068866	0.271663249790543	0.740979686057518	FALSE	rs2562004	1	FALSE	FALSE
ENSG00000125107.12	CNOT1	17.2153454602278	11.5445775933123	+	8.83403110150634e-05	TRUE	FALSE	FALSE	FALSE	NA	+	-	0.00282	0	0	0.418186211655227	0.0171304406321083	0	0.81702452362961	FALSE	FALSE	0	0	0.330129583653991	FALSE	0.447290914142818	0.144615951451598	-0.538774071941433	1	0.403460794217121	0.305937977297121	1	0.114417143375589	0.0125800083955833	0.37566049138564	FALSE	rs35115715	1	FALSE	FALSE
ENSG00000071051.9	NCK2	21.6891116325846	14.1798400494595	-	8.85646497967452e-05	FALSE	TRUE	FALSE	FALSE	NA	-	-	0.12	0.118697636345706	0	0.676492906566994	0.48098722326419	0	0.751847466273771	FALSE	FALSE	0	0	0.411040735385812	FALSE	0.286190608502362	1	1	1	0.151516879845721	-1	1	0.109379834030331	0.00426930387150932	0.414259267631037	FALSE	rs13017109	1	FALSE	FALSE
ENSG00000269636.1	NA	6.70322610294118	2.20235637865392	-	8.88920176931767e-05	FALSE	TRUE	FALSE	FALSE	NA	-	NA	NA	0	0	0.523517439878201	0.0631657396782314	0	0.677232399099225	FALSE	FALSE	0	0	0.462041403680416	FALSE	0.473353709363712	1	-0.0333974128114965	1	0.293336104701167	-0.23677490516288	1	0.372786845706795	0.211647627555164	0.671392655039641	FALSE	rs2278383	1	FALSE	FALSE
ENSG00000144567.6	FAM134A	27.5433460827465	7.55493915950663	+	8.90688127306519e-05	TRUE	FALSE	FALSE	FALSE	NA	-	+	4.23e-07	0.0905958019785095	0	0.77048851577579	0.236379110362901	0	0.57571020410951	FALSE	FALSE	0	0	0.342364687915019	FALSE	0.631897749374826	1	1	1	1	1	1	0.427934267323559	0.161886070847198	0.67158383026861	FALSE	rs3731908	0.734122389472418	TRUE	FALSE
ENSG00000011600.5	TYROBP	777.858370108696	54560.680105228	-	8.93651318217e-05	FALSE	TRUE	FALSE	FALSE	NA	+	+	1.35e-08	0.527433056560113	0	0.806644730101599	0.0823376493050002	0	0.604913486203015	FALSE	FALSE	0.0475027900878505	0	0.525682721744813	FALSE	0.363545429285913	1	1	1	-1	-1	1	0.253859002022302	0.174802838023313	0.55043348180535	FALSE	rs1005194	1	FALSE	FALSE
ENSG00000134153.5	EMC7	17.4039135117493	7.04897141616267	-	8.94111809729591e-05	FALSE	TRUE	FALSE	FALSE	NA	-	+	0.0363	0.0841123399920205	0	0.556413820050955	0	0	0.691459842535899	FALSE	FALSE	0	0	0.784331849603051	FALSE	0.0241178105029175	1	-0.24855482882345	1	-1	-1	0.325515191297484	0.0569134337556471	-0.101055676818735	0.518880079792675	FALSE	rs17235722	0.979334558866071	TRUE	FALSE
ENSG00000166275.10	BORCS7	1.7847566539924	0.735205689834018	-	9.06674602957477e-05	FALSE	TRUE	FALSE	FALSE	NA	-	+	0.00512	0.203615373855951	0	0.739078703703085	0	0	0.291663867377567	FALSE	FALSE	0	0	0.451007967897546	FALSE	0.151097527090859	1	0.922452390710157	1	-1	-1	1	0.0403371269049265	-0.0746318213537119	0.374940342169015	FALSE	rs11191779	1	FALSE	FALSE
ENSG00000180353.6	HCLS1	194.89687487692	1002.13664265634	+	9.0806100497415e-05	TRUE	FALSE	FALSE	FALSE	NA	+	+	0.0098	0.602047937084967	0.169910197058792	0.791255183501983	0	0	0.655591610043234	FALSE	FALSE	0	0	0.369602634842857	FALSE	0.395109752709086	1	1	1	0.00850771577377302	-0.00672644653564843	1	0.0865717958312332	-0.00325147026684062	0.365370033219735	FALSE	rs11719994	1	FALSE	TRUE
ENSG00000077549.13	CAPZB	119.51806224711	242.274621105293	+	9.10460009505096e-05	TRUE	FALSE	FALSE	FALSE	NA	+	+	0.000524	0.570510525586858	0	0.753011793351811	0.509683998108196	0	0.801848587224236	FALSE	FALSE	0	0	0.528652828652554	FALSE	0.431953320366769	1	1	1	-1	-1	0.951866366493832	-0.191452760936636	-0.327073894482021	0.269874638641998	FALSE	rs3790744	1	FALSE	FALSE
ENSG00000112118.11	MCM3	12.6074952201258	8.70174303404368	+	9.18906687560683e-05	TRUE	FALSE	FALSE	FALSE	NA	+	-	7.21e-08	0.305127200959923	0	0.637281319326117	0	0	0.45852876869895	FALSE	FALSE	0	0	0.424562045146737	FALSE	0.637510419560989	0.812469295147782	0.900228961442858	1	0.724412299021896	0.12634617995172	1	0.425454661165531	0.339341470430704	0.630283207149662	FALSE	rs9474058	1	FALSE	FALSE
ENSG00000259291.1	NA	20.2135625	9.40841373385218	+	9.24912438432835e-05	TRUE	FALSE	FALSE	FALSE	NA	+	NA	NA	0	0	0.704530651843873	0.351373456990071	0	0.628781142768922	FALSE	FALSE	0.420502391465218	0	0.815890083055063	FALSE	0.330258405112531	-0.103440180173859	-1	1	1	-0.000135560551659737	1	0.185107602797738	0.000274666716967987	0.71182502973283	FALSE	rs150303	1	FALSE	FALSE
ENSG00000256235.1	SMIM3	5.68257204935622	1.58357385953084	-	9.26434128995055e-05	FALSE	TRUE	FALSE	FALSE	NA	-	+	0.0241	0	0	0.526757564999508	0.0776799973343625	0	0.678363426891204	FALSE	FALSE	0	0	0.502057307673159	FALSE	0.469185884968047	1	-0.770894569443215	1	0.287909564750931	-0.16636121893175	1	0.376811408858079	0.206798223840764	0.682088347044817	FALSE	rs2278383	1	FALSE	FALSE
ENSG00000134294.9	SLC38A2	7.1635422928051	16.4149183098357	-	9.3304553660905e-05	FALSE	TRUE	FALSE	FALSE	NA	-	-	2.92e-05	0	0	0.694176132502836	0	0	0.632610331452928	FALSE	FALSE	0	0	0.18922317556181	FALSE	0.237343706585163	0.997139635504677	0.985558330644262	1	0.220655963063352	-0.248465356450582	0.921291931423447	0.249483273386845	0.156814156993501	0.482144958817555	FALSE	rs7314254	1	FALSE	FALSE
ENSG00000106245.5	BUD31	13.2804708175306	8.82872911263736	-	9.33606075043013e-05	FALSE	TRUE	FALSE	FALSE	NA	+	+	0.00427	0.49171634957101	0	0.724511139455912	0	0	0.756030483795574	FALSE	FALSE	0	0	0.125209684462468	FALSE	0.199444290080578	1	-0.912886926273231	1	-1	-1	-0.0844523045477081	0.36184458267754	0.286875708698292	0.664046053290141	FALSE	rs6967487	1	FALSE	FALSE
ENSG00000026025.9	VIM	301.73276833636	3184.28769116221	+	9.4362924180001e-05	TRUE	FALSE	FALSE	FALSE	NA	+	+	2.39e-15	0.781631380428387	0.336012242406306	0.899713633845745	0.227071338178387	0	0.622261418426854	FALSE	FALSE	0	0	0.325225895603218	FALSE	0.532925812725757	1	1	1	0.00477425421966948	0.00279715482505547	1	-0.14042776395267	-0.240497555291825	0.758402821515882	FALSE	rs10904854	1	FALSE	FALSE
ENSG00000163866.8	SMIM12	4.01495634896091	0.351398708278835	-	9.43948321711507e-05	FALSE	TRUE	FALSE	FALSE	NA	-	+	0.0115	0.514414266926062	0.067791722560365	0.793572678953776	0	0	0.480870612504838	FALSE	FALSE	0.491811740487792	0	0.769814522217842	FALSE	0.219505418171714	-1	-1	1	1	-1	1	0.37316353318182	0.156389239836947	0.71277411437029	FALSE	rs911216	1	FALSE	FALSE
ENSG00000141759.10	TXNL4A	8.05638332100592	2.75230211051827	-	9.5095097550173e-05	FALSE	TRUE	FALSE	FALSE	NA	-	-	0.84	0.118577897173354	0	0.54376816061505	0	0	0.610156248176853	FALSE	FALSE	0.302800527892239	0	0.724402330227697	FALSE	0.251347596554599	-0.748549079648525	-0.99979059121687	1	-1	-1	1	0.20049254911055	0.136504507798239	0.424541705568326	FALSE	rs754093	1	FALSE	FALSE
ENSG00000132465.6	JCHAIN	16.1264972443356	3872.08781853138	-	9.51222875486056e-05	FALSE	TRUE	FALSE	FALSE	NA	-	-	6.52e-19	0.447647696065199	0.0171316324693009	0.605121624966893	0.376902720031618	0	0.697415120366728	FALSE	FALSE	0.266555596530756	0	0.483091975592842	FALSE	0.486301750486246	0.784857113914979	0.736432970805017	1	0.00195137128877232	0.00206397293060662	1	0.140978543049897	-0.0412147813988669	0.496573590762301	FALSE	rs1031453	1	FALSE	FALSE
ENSG00000149792.4	MRPL49	14.2198513162171	4.97741355450515	-	9.51767682983639e-05	FALSE	TRUE	FALSE	FALSE	NA	-	-	0.0435	0.419228944635111	0	0.557698873796903	0	0	0.440461016807004	FALSE	FALSE	0	0	0.34760079774612	FALSE	0.596832453459294	1	0.974902955342184	1	0.00888490015705813	0.000542554293621257	1	0.298354349855584	0.220845514367878	0.509437833304668	FALSE	rs10896045	1	FALSE	FALSE
ENSG00000198898.6	CAPZA2	6.50956160763953	27.4366762461686	-	9.58916795210084e-05	FALSE	TRUE	FALSE	FALSE	NA	-	+	0.00631	0	0	0.301350485145107	0	0	0.465395092710196	FALSE	FALSE	0	0	0	FALSE	0.351653237010281	1	0.998056163331326	1	0.331418443368238	-1	1	0.319974658629425	0.0969595183927328	0.599213109042341	FALSE	rs41793	1	FALSE	FALSE
ENSG00000102900.7	NUP93	3.13626025816596	0.36207687074225	+	9.59526093972947e-05	TRUE	FALSE	FALSE	FALSE	NA	+	-	0.547	0	0	0.481090617901488	0.269564927391058	0	0.527382956805167	FALSE	FALSE	0.107112679994182	0	0.433482825527673	FALSE	0.584217838288414	1	NA	NA	1	NA	NA	0.270793373400038	NA	NA	FALSE	rs727216	1	FALSE	FALSE
ENSG00000154188.5	ANGPT1	0.142619529271039	0.0255894071798907	-	9.63166604712346e-05	FALSE	TRUE	FALSE	FALSE	NA	-	+	0.514	0.188694837710554	0	0.721697076764588	0.419852209840185	0	0.869575343592997	FALSE	FALSE	0.0718306115755053	0	0.67164160961406	FALSE	0.434843011947763	1	0.943345575017386	1	0.381758913605065	0.131788996113777	1	0.139830524737874	0.0366965333923998	0.5293945428211	FALSE	rs55930883	1	FALSE	FALSE
ENSG00000132603.9	NIP7	3.49915229357798	0.773829731489367	-	9.67996588708074e-05	FALSE	TRUE	FALSE	FALSE	NA	-	-	0.0289	0.486907541562517	0	0.691176625822097	0.0932425881031329	0	0.449930536316339	FALSE	FALSE	0.0186392482494923	0	0.375029971254785	FALSE	0.279744373437066	1	1	1	1	-0.00079562954440386	1	0.0797964928279893	-0.00331345680316642	0.35641751259137	FALSE	rs8057463	0.69394237352554	TRUE	FALSE
ENSG00000205981.2	DNAJC19	1.35096676905892	0.236103726405532	-	9.72926562883328e-05	FALSE	TRUE	FALSE	FALSE	NA	-	-	1.68e-08	0.420363865495863	0	0.586145195129149	0	0	0.374241537872346	FALSE	FALSE	0	0	0.173926441239095	FALSE	0.265184773548208	1	0.99780455448603	1	1	0.00463636531960451	1	0.039925162012571	-0.0610769815408173	0.267995295910871	FALSE	rs6443751	1	FALSE	FALSE
ENSG00000170962.8	PDGFD	0.769066492484735	0.311652025984977	-	9.73933926076589e-05	FALSE	TRUE	FALSE	FALSE	NA	-	+	5.99e-34	0.441940607949561	0	0.613736751430411	0.718349043100776	0.441616437007366	0.865314257964805	FALSE	FALSE	0	0	0.674108750767826	FALSE	0.531258682967491	0.671960386979886	0.567197363791361	1	0.0219132306446422	-0.00123967086154838	1	0.448951971930902	0.319115692592626	0.729684997782695	FALSE	rs1032235	1	FALSE	FALSE
ENSG00000127720.3	METTL25	1.02956860465116	0.0801788298223987	-	9.77245973207694e-05	FALSE	TRUE	FALSE	FALSE	NA	-	-	9.48e-07	0	0	0.174206376596576	0.149914957406196	0	0.745676291534252	FALSE	FALSE	0.0764010516521649	0	0.809092781882727	FALSE	0.24962489580439	1	-0.55330705331246	1	0.00261215301682986	0.00211274846950629	1	0.140589217589551	0.0580021977166661	0.620871463725045	FALSE	rs11503268	1	FALSE	FALSE
ENSG00000188846.9	RPL14	83.24796859401	1000.15054716378	-	9.83731894248959e-05	FALSE	TRUE	FALSE	FALSE	NA	-	-	4.22e-05	0.733557616415233	0.278243498220094	0.830799169537683	0	0	0.186464719474232	FALSE	TRUE	0.488665203226437	0	0.842946286361308	FALSE	0.147540983606557	1	-1	1	-1	-1	1	0.322944224833319	0.17805538822586	0.592878786400132	FALSE	rs930916	1	FALSE	FALSE
ENSG00000100242.11	SUN2	113.766903157854	444.284398988576	+	9.92577161968445e-05	TRUE	FALSE	FALSE	FALSE	NA	+	-	0.364	0	0	0.538765380994377	0.104160658635607	0	0.550515415155894	FALSE	FALSE	0	0	0.471087333032054	FALSE	0.583439844401223	0.999579302557668	0.933971236505501	1	0.861274380584052	0.616224337273783	1	0.445340169509633	0.333589352913905	0.673242971976749	FALSE	rs735306	1	FALSE	FALSE
ENSG00000070785.12	EIF2B3	1.96997354497354	0.27591546229943	-	9.93287689223975e-05	FALSE	TRUE	FALSE	FALSE	NA	+	NA	NA	0.376426878225863	0	0.744406074518421	0	0	0.362912645987174	FALSE	FALSE	0.49335844182441	0	0.724934113235872	FALSE	0.135148652403445	-1	-1	1	1	-1	1	0.30050004635215	0.134770809446868	0.572653780703071	FALSE	rs79421110	1	FALSE	FALSE
ENSG00000162980.11	ARL5A	1.34343500298151	0.772082041946091	-	9.94999048527569e-05	FALSE	TRUE	FALSE	FALSE	NA	-	NA	NA	0	0	0.556249133209669	0	0	0.444834192777427	FALSE	FALSE	0	0	0.040780411645132	FALSE	0.249235898860795	1	1	1	0.420868009591797	-0.451597907757874	1	-0.0502181255253999	-0.152310002863288	0.195900051514369	FALSE	rs4664583	1	FALSE	FALSE
ENSG00000265118.1	NA	169.019522761194	2009.49296760881	-	0.000100109311988207	FALSE	TRUE	FALSE	FALSE	NA	-	NA	NA	0.410206309995471	0	0.640237921981183	0	0	0.446735072295363	FALSE	FALSE	0.565712738381527	0.00368339419335341	0.852584590316671	TRUE	0.375159766601834	-0.464142032299632	-1	1	0.00168142567548423	-0.000226343270345132	1	0.507002099006686	0.367754202750488	0.739334344865384	FALSE	rs8067737	1	FALSE	FALSE
ENSG00000118197.9	DDX59	2.87734928202827	0.634396565124472	-	0.000100310437190899	FALSE	TRUE	FALSE	FALSE	NA	-	-	0.643	0	0	0.392746801229804	0	0	0.452916766103864	FALSE	FALSE	0	0	0.207757992187802	FALSE	0.220005557099194	1	1	1	0.312824974333883	-1	1	-0.0965200464711742	-0.196815692236959	0.221549463124814	FALSE	rs3828105	1	FALSE	FALSE
ENSG00000165264.6	NDUFB6	13.9851964941263	16.5200327500739	-	0.000100363260402776	FALSE	TRUE	FALSE	FALSE	NA	+	-	0.158	0.223132214264942	0	0.693213219499154	0	0	0.506508667272969	FALSE	FALSE	0	0	0.111169188153021	FALSE	0.0373437065851626	1	1	1	-1	-1	1	-0.119637723225109	-0.284054091654642	0.316764364695714	FALSE	rs7025476	1	FALSE	FALSE
ENSG00000174231.12	PRPF8	35.4257389921396	74.349797579419	+	0.000103534957593938	TRUE	FALSE	FALSE	FALSE	NA	+	-	0.00107	0	0	0.0676608894077739	0	0	0.495030611031238	FALSE	FALSE	0	0	0.206198732128507	FALSE	0.402167268685746	0.671811322499501	0.663371058652702	1	0.427801351966601	0.206222050332979	1	0.284544087797159	0.208135146058224	0.508678388657329	FALSE	rs8066936	1	FALSE	FALSE
ENSG00000245970.2	NA	26.1307118772018	176.009485439977	-	0.000103852031290327	FALSE	TRUE	FALSE	FALSE	NA	-	NA	NA	0.347912874655317	0	0.648943670468976	0	0	0.391712952355551	FALSE	FALSE	0	0	0.479183757545955	FALSE	0.251236454570714	1	-0.0478256408190163	1	-1	-1	1	-0.0239004518738025	-0.156075065596846	0.283374290264349	FALSE	rs11781517	1	FALSE	FALSE
ENSG00000198189.6	HSD17B11	66.4325447607261	254.351286348431	-	0.000105406212640812	FALSE	TRUE	FALSE	FALSE	NA	-	+	0.00352	0.439959494770082	0	0.750096397680197	0	0	0.412286547853091	FALSE	FALSE	0	0	0.572099746402855	FALSE	0.418616282300639	1	0.647553079736144	1	-0.052257885310131	-1	1	0.465132540937839	0.325069681077012	0.70304932525435	FALSE	rs6843070	1	FALSE	FALSE
ENSG00000187608.5	ISG15	67.4306558533145	22862.7089111434	-	0.000105891140866856	FALSE	TRUE	FALSE	FALSE	NA	+	+	0.312	0	0	0.174978953307143	0.596426257214437	0	0.791549425771714	FALSE	FALSE	0	0	0.586614607216362	FALSE	0.501361489302584	1	1	1	0.918317425355202	0.00753663818794173	1	0.291527587668307	0.18472427735868	0.569912689049916	FALSE	rs4970419	1	FALSE	TRUE
ENSG00000178307.5	TMEM11	5.18912295702179	0.805708419075048	-	0.00010702126615122	FALSE	TRUE	FALSE	FALSE	NA	-	-	0.99	0.12441953850507	0	0.663515833125254	0	0	0.483147423237918	FALSE	FALSE	0	0	0.195378095478107	FALSE	0.0986940816893582	-0.988396582949397	-0.992654367427133	1	-0.544823810778733	-1	1	0.297292391693019	0.164024165318921	0.503241550535479	FALSE	rs8075299	1	FALSE	FALSE
ENSG00000101182.10	PSMA7	44.2468155479059	55.959814469103	-	0.000108112400473426	FALSE	TRUE	FALSE	FALSE	NA	-	+	0.238	0.401182572841347	0	0.65726336715849	0	0	0.0316504581777041	FALSE	FALSE	0	0	0.307437564092851	FALSE	0.19899972214504	-0.558959794180782	-1	1	-1	-1	1	0.237951625901853	0.118089424265784	0.441520572020642	FALSE	rs2386939	1	FALSE	FALSE
ENSG00000140391.10	TSPAN3	5.99152915817193	3.55875592450168	-	0.000108495695751061	FALSE	TRUE	FALSE	FALSE	NA	-	-	5.8e-17	0.543759039071506	0	0.793842765629862	0.610631562111354	0	0.764397886540516	FALSE	FALSE	0	0	0.181300342917265	FALSE	0.668685746040567	1	1	1	0.0034075246461796	0.00276798170725545	0.977025050374702	0.127217091489223	-0.174003033259794	0.508968146153795	FALSE	rs62009135	1	FALSE	FALSE
ENSG00000105205.6	CLC	56.6331115293185	2570.78296529288	-	0.000108534860172201	FALSE	TRUE	FALSE	FALSE	NA	-	+	3.35e-08	0.559630032591003	0	0.790866310681603	0.00744021612658931	0	0.656180041972804	FALSE	FALSE	0	0	0.563403410821746	FALSE	0.508252292303418	1	1	1	-1	-1	1	0.328043683945604	0.170407805547273	0.656162697463329	FALSE	rs10410648	0.204824568978963	TRUE	FALSE
ENSG00000100097.7	LGALS1	96.438733989021	1105.56707254873	-	0.000109233758423413	FALSE	TRUE	FALSE	FALSE	NA	-	+	6.17e-42	0.626558002397755	0.220607344146862	0.766550555928383	0.154049677569042	0	0.642687676068059	FALSE	FALSE	0.433767369384129	0	0.748866429402474	FALSE	0.431953320366769	1	1	1	0.0519308601183938	-1	1	0.186810486687527	0.00582123927222321	0.589861252704549	FALSE	rs1003694	1	FALSE	FALSE
ENSG00000184922.9	FMNL1	215.530274046521	1844.69510828389	+	0.000109782227682523	TRUE	FALSE	FALSE	FALSE	NA	+	+	0.0144	0.456701087000895	0	0.679756244727964	0	0	0.270037084912739	FALSE	FALSE	0	0	0.284021768385197	FALSE	0.394831897749375	1	1	1	-1	-1	1	0.00754327365693605	-0.0905363128061986	0.294068674585426	FALSE	rs6503410	1	FALSE	FALSE
ENSG00000006327.9	TNFRSF12A	2.5396704175705	0.748394281069753	-	0.000110942873583466	FALSE	TRUE	FALSE	FALSE	NA	+	+	0.333	0.470832959280832	0.00554041230176565	0.703355450959407	0.423249581369187	0	0.621246321539958	FALSE	FALSE	0.248104667620636	0	0.447321885996189	FALSE	0.317310363989997	0.382194086763458	0.341044863466692	1	1	0.00329387625389193	1	-0.0910222976026918	-0.200560478868802	0.237493301880243	FALSE	rs2741916	1	FALSE	FALSE
ENSG00000136811.9	ODF2	5.98423769718793	1.40390986719912	+	0.000112001783344648	TRUE	FALSE	FALSE	FALSE	NA	+	-	0.263	0	0	0.287334606246593	0	0	0.48059028501667	FALSE	FALSE	0	0	0.188473652189824	FALSE	0.604445679355377	1	0.654561314603486	1	0.0045160639877545	0.00369290459970319	1	0.388310113909786	0.27902364828198	0.549428211692786	FALSE	rs4837358	1	FALSE	FALSE
ENSG00000136935.8	GOLGA1	6.35111085178056	1.22960222275867	+	0.000112373396877448	TRUE	FALSE	FALSE	FALSE	NA	+	+	0.306	0.177968054897469	0	0.455316781386962	0.10896193117735	0	0.611255784753886	FALSE	FALSE	0.266928789024803	0	0.566341704109062	FALSE	0.276687968880245	0.209223478684243	-0.968852032855556	1	1	0.0196363980214994	1	0.186464324444707	0.02097292531017	0.531966971480642	FALSE	rs4838088	1	FALSE	FALSE
ENSG00000161203.9	AP2M1	58.3340089869281	79.3833267323879	+	0.000113419026543897	TRUE	FALSE	FALSE	FALSE	NA	+	+	0.00185	0	0	0.1982177702136	0	0	0.670821205593004	FALSE	FALSE	0	0	0.507605297699389	FALSE	0.389497082522923	0.707010168618308	0.263404552735741	1	0.558605153035039	0.246193038229121	1	0.247712997185338	0.153473163131673	0.579090379031198	FALSE	rs56009610	1	FALSE	TRUE
ENSG00000213087.3	NA	1.45301637279597	1.80461432191012	-	0.000113443067749974	FALSE	TRUE	FALSE	FALSE	NA	-	NA	NA	0.203056196816067	0	0.557462007262346	0	0	0.115319156567551	FALSE	FALSE	0.250105635493202	0	0.675390344507926	FALSE	0.144206724090025	-1	NA	NA	-0.00435179626731814	NA	NA	0.306887453461287	NA	NA	FALSE	rs6900329	1	FALSE	FALSE
ENSG00000148834.8	GSTO1	24.807877849905	56.0600762821106	-	0.00011407681384208	FALSE	TRUE	FALSE	FALSE	NA	-	+	6.2e-17	0.217962456411282	0	0.647325731783535	0	0	0.632829559520427	FALSE	FALSE	0	0	0.388238444395241	FALSE	0.115587663239789	1	1	1	-1	-1	1	-0.0631075731575231	-0.225239952598322	0.284127998339129	FALSE	rs17116266	1	FALSE	FALSE
ENSG00000242616.2	GNG10	8.4266275579809	40.9944523490436	-	0.000114088449009466	FALSE	TRUE	FALSE	FALSE	NA	-	NA	NA	0	0	0.47804973563298	0	0	0.577985743441074	FALSE	FALSE	0	0	0.129943720722731	FALSE	0.53953876076688	0.997945433391294	0.831348925289358	1	0.632783341863821	0.322116346330781	1	0.266074564107997	0.153718417390794	0.513788042064081	FALSE	rs7023788	1	FALSE	FALSE
ENSG00000110514.14	MADD	12.1602494886911	6.52743826860466	+	0.000114637625766402	TRUE	FALSE	FALSE	FALSE	NA	+	+	5.95e-05	0	0	0.357485348692358	0.0119372327023958	0	0.528971954046414	FALSE	FALSE	0	0	0.282390866421043	FALSE	0.594831897749375	1	0.87922359071728	1	1	0.535422521715014	1	0.289488631405151	0.207718961078087	0.548761219001235	FALSE	rs61914724	1	FALSE	FALSE
ENSG00000177954.7	RPS27	11.7457307794274	18.6621988048501	-	0.000115328492375256	FALSE	TRUE	FALSE	FALSE	NA	-	NA	NA	0.510004602885056	0	0.695641345863038	0	0	0.448282177928151	FALSE	FALSE	0	0	0.0494065037457897	FALSE	0.329369269241456	1	0.0042426347608913	1	-1	-1	1	0.322802069786707	0.144344421603898	0.515443277430245	FALSE	rs12125683	1	FALSE	FALSE
ENSG00000170458.9	CD14	214.144982882166	4696.64767920159	+	0.000116618228361321	TRUE	FALSE	FALSE	FALSE	NA	-	+	8.25e-06	0.561230063685614	0	0.856775518937227	0.483082436303112	0	0.798235206382525	FALSE	FALSE	0	0	0.455883765238904	FALSE	0.598332870241734	1	1	1	0.999999993677732	-1	1	-0.270508674947989	-0.367717495037449	0.179259905734368	FALSE	rs13183810	1	FALSE	FALSE
ENSG00000124942.8	AHNAK	28.2533238840431	106.375871651147	+	0.000117975184107709	TRUE	FALSE	FALSE	FALSE	NA	+	+	1.57e-27	0	0	0.420883795378585	0.274675549012774	0	0.752943529113612	FALSE	FALSE	0	0	0.385364102897584	FALSE	0.282133926090581	1	-0.0418605519310552	1	0.339261655724022	0.0952114579780116	1	0.430863702317644	0.324018958519084	0.690964335843411	FALSE	rs10792352	1	FALSE	FALSE
ENSG00000163154.5	TNFAIP8L2	78.8955986394558	272.923091031561	-	0.000118276598763082	FALSE	TRUE	FALSE	FALSE	NA	+	-	0.475	0.733102676533405	0.171934443264255	0.867131638216831	0	0	0.65577458437552	FALSE	FALSE	0	0	0.375371166879166	FALSE	0.368935815504307	1	1	1	-1	-1	1	0.0584434799055162	-0.106975290273069	0.430342133954791	FALSE	rs1891589	1	FALSE	FALSE
ENSG00000050130.12	JKAMP	5.12377480785067	2.19342164412412	-	0.000119099888702641	FALSE	TRUE	FALSE	FALSE	NA	-	+	0.372	0	0	0.551975099043917	0	0	0.523284416934231	FALSE	FALSE	0	0	0.631018871587665	FALSE	0.153431508752431	-0.447033172027893	-1	1	0.115850587717422	-0.08321611044905	1	0.170822484992501	0.104188690446823	0.519045271363854	FALSE	rs11629363	1	FALSE	FALSE
ENSG00000198612.6	COPS8	2.15093043524192	0.439168562746147	-	0.00011960606316657	FALSE	TRUE	FALSE	FALSE	NA	-	-	0.0504	0.14526973548202	0	0.660317129588411	0.116189609754468	0	0.506028643647772	FALSE	FALSE	0	0	0.408055960916623	FALSE	0.19722145040289	0.777856943518596	-1	1	-1	-1	1	0.0651787572934154	-0.0424988498972711	0.344243037259189	FALSE	rs6724943	1	FALSE	FALSE
ENSG00000259112.1	NDUFC2-KCTD14	30.6590463598901	70.2240328743793	-	0.0001196407770072	FALSE	TRUE	FALSE	FALSE	NA	-	NA	NA	0.580854842206723	0.0122208163229294	0.747630807428494	0.0362400161970594	0	0.758502161511644	FALSE	FALSE	0.343628038722276	0	0.673858110082382	FALSE	0.213003612114476	1	1	1	-1	-1	1	0.0328824032803501	-0.212151307995464	0.436078298289996	FALSE	rs530588	1	FALSE	FALSE
ENSG00000214253.4	FIS1	23.4671377379619	27.2147272230739	-	0.000119702277001976	FALSE	TRUE	FALSE	FALSE	NA	+	-	0.802	0.596926361165207	0	0.862785950205355	0.00644400882468045	0	0.662759344844566	FALSE	FALSE	0	0	0.575547815250883	FALSE	0.389886079466519	1	0.636105048170763	1	-1	-1	1	-0.0470298824550166	-0.244476312295756	0.380060093362428	FALSE	rs221795	1	FALSE	FALSE
ENSG00000143252.9	SDHC	11.7433513210369	3.010303806962	-	0.000119723455641963	FALSE	TRUE	FALSE	FALSE	NA	+	+	0.242	0.486805949011199	0	0.70345800381136	0	0	0.406442115771876	FALSE	FALSE	0.0387823660646972	0	0.577405960060103	FALSE	0.402167268685746	1	0.956140085773988	1	-1	-1	1	0.161941716633662	0.0853106047977299	0.42582779086264	FALSE	rs12130871	1	FALSE	FALSE
ENSG00000144848.6	ATG3	7.36858992378299	2.74235403077475	-	0.000120148240301401	FALSE	TRUE	FALSE	FALSE	NA	-	+	9.1e-05	0	0	0.262087700220166	0	0	0.257705378576645	FALSE	FALSE	0	0	0.320483417066477	FALSE	0.168102250625174	-0.969349870941008	-0.997034599558273	1	-1	-1	0.841240178681694	0.381637861510301	0.254302266588093	0.613029071806792	FALSE	rs9844028	1	TRUE	FALSE
ENSG00000171135.10	JAGN1	13.8257479131886	7.21523027441027	-	0.000120587895562625	FALSE	TRUE	FALSE	FALSE	NA	-	NA	NA	0.647172714731497	0.248237074750513	0.797897308226043	0	0	0.43961316938051	FALSE	TRUE	0.465260237168613	0	0.661749114883714	FALSE	0.378438455126424	1	-0.223067069249017	1	-1	-1	1	0.349091518167848	0.213450626395423	0.60332146807013	FALSE	rs34905	1	FALSE	FALSE
ENSG00000100985.7	MMP9	78.7611665949204	3762.32255424598	+	0.000120614088304594	TRUE	FALSE	FALSE	FALSE	NA	+	+	2.72e-15	0.124672357005374	0	0.608410771882498	0	0	0.781739713352304	FALSE	FALSE	0.047122979855706	0	0.668462386089678	FALSE	0.464629063628786	1	0.560936400942457	1	1	0.00451380003767096	1	0.378116242735236	0.236341932316099	0.653601522980614	FALSE	rs85022	1	FALSE	FALSE
ENSG00000227543.3	SPAG5-AS1	6.24394758064516	1.12056146356623	+	0.000120680347817893	TRUE	FALSE	FALSE	FALSE	NA	+	NA	NA	0	0	0.107527038828836	0	0	0.189998524307611	FALSE	FALSE	0	0	0.570889262352067	FALSE	0.182550708530147	-0.0014153585190328	-0.999201537711673	0.999999764081029	1	-1	1	0.15088163536356	0.0630820486072526	0.409265191792304	TRUE	rs2429244	1	FALSE	FALSE
ENSG00000170275.9	CRTAP	31.9167896601942	27.4458062229475	-	0.000121921738757198	FALSE	TRUE	FALSE	FALSE	NA	-	+	6.03e-08	0.716069850772269	0.0070223569576385	0.821485632176623	0	0	0.494320953871784	FALSE	FALSE	0	0	0.575643422692252	FALSE	0.671130869686024	1	1	1	1	0.00531947772734838	1	0.144814047862332	0.0110116136979104	0.551271248947431	FALSE	rs11927331	0.896845433291957	TRUE	FALSE
ENSG00000154723.8	ATP5J	4.23761566797642	2.53339390540593	-	0.000122122185536435	FALSE	TRUE	FALSE	FALSE	NA	-	-	0.0479	0.333507942466269	0	0.579332064454702	0	0	0.338025254676214	FALSE	FALSE	0.379182675371178	0	0.597762889251179	FALSE	0.000166712975826619	-1	-1	-0.423542440734642	-0.000960049554626611	-0.00381239285622966	1	0.217097554198949	0.0683120694093772	0.480032233770703	TRUE	rs3017522	1	FALSE	FALSE
ENSG00000115268.4	RPS15	57.6608406111521	309.818080106889	-	0.000122410795567453	FALSE	TRUE	FALSE	FALSE	NA	-	-	9.38e-06	0.593558871716484	0.0563332357906264	0.793003661335773	0	0	0.292186255920203	FALSE	FALSE	0.329429941814601	0	0.655401471703073	FALSE	0.234731869963879	-1	-1	1	0.074679007519652	-1	1	0.239263709424456	0.0784821195873234	0.557724706539538	FALSE	rs73516521	1	FALSE	FALSE
ENSG00000072110.9	ACTN1	42.0813781255897	94.4862726760607	+	0.00012257184695171	TRUE	FALSE	FALSE	FALSE	NA	+	-	0.00386	0.759759075689947	0.532740845177975	0.90523488920378	0	0	0.552004563226184	FALSE	TRUE	0	0	0.474423695454053	FALSE	0.530869686023896	1	1	1	-1	-1	1	0.145739873035029	-0.211085596020639	0.491923990468184	FALSE	rs12897613	1	FALSE	FALSE
ENSG00000187764.7	SEMA4D	36.1563627529004	37.3118581809637	+	0.000122714117881562	TRUE	FALSE	FALSE	FALSE	NA	+	-	0.0557	0.490644073603298	0.11519253927265	0.615031926818488	0.45985715017834	0	0.624550918449722	FALSE	FALSE	0	0	0.403473514675951	FALSE	0.417727146429564	0.707935827741531	0.697435157938928	1	-0.000992866811749778	-0.06529583177427	1	-0.0646697269754144	-0.254499030805824	0.292105430566172	FALSE	rs10908947	1	FALSE	FALSE
ENSG00000134825.8	TMEM258	11.4053853033473	9.98085390993373	-	0.000122891066401229	FALSE	TRUE	FALSE	FALSE	NA	-	-	0.00302	0.57696285415782	0	0.744435096626319	0	0	0.343958592496435	FALSE	FALSE	0	0	0.345738207577658	FALSE	0.261517088080022	1	-1	1	-1	-1	-0.119559127593022	0.276456024190817	0.105082100004769	0.54411976117485	FALSE	rs11230906	1	FALSE	FALSE
ENSG00000224831.2	NA	8.26931924778761	2.52058502877287	-	0.000122949416805187	FALSE	TRUE	FALSE	FALSE	NA	-	NA	NA	0.258839779398711	0	0.538727187142655	0.200170995187203	0	0.44862153449314	FALSE	FALSE	0	0	0.244808839969883	FALSE	0.211725479299806	1	0.812803416396069	1	0.00191221666367629	0.000290674342290879	0.583620126794322	-0.0840477700078983	-0.177917876244028	0.32557112645159	FALSE	rs1386288	1	FALSE	FALSE
ENSG00000170584.5	NUDCD2	2.08189448138298	0.54310844364589	-	0.000123714825170613	FALSE	TRUE	FALSE	FALSE	NA	-	-	9e-05	0.202948639490076	0	0.508220655900785	0.264837843965758	0	0.621921206113037	FALSE	FALSE	0.285249321016579	0	0.676410112343933	FALSE	0.203723256460128	-0.852363894139628	-1	1	-0.00246627197599008	-0.00441990253468677	-0.000946679341494697	0.220893691420121	0.071793710057052	0.443833592576362	FALSE	rs1288209	1	FALSE	FALSE
ENSG00000125868.10	DSTN	16.0092444072878	11.9767754628876	-	0.000123918986873821	FALSE	TRUE	FALSE	FALSE	NA	-	+	0.003	0.580466252623085	0	0.797899877224682	0	0	0.558503467048988	FALSE	FALSE	0.718180890328464	0	0.851845769994239	FALSE	0.405612670186163	1	0.825456547953425	1	1	-1	1	0.582105480362136	0.515855102670935	0.768030290088843	FALSE	rs722798	1	FALSE	FALSE
ENSG00000011260.9	UTP18	10.5787046992481	3.93928098271363	-	0.000124313247481923	FALSE	TRUE	FALSE	FALSE	NA	-	-	0.000594	0.571769504104982	0.0900477321249344	0.778336433606307	0.068598569699103	0	0.375763297624364	FALSE	FALSE	0.282922225282795	0	0.618237212428139	FALSE	0.311419838844123	-1	-1	0.0348243552607747	-0.00270726903069585	-1	0.0392737760266212	0.496879325241674	0.423563768058292	0.644290814428979	TRUE	rs8074198	1	FALSE	FALSE
ENSG00000104856.9	RELB	19.7531861957602	19.9185728107795	+	0.000124589287991521	TRUE	FALSE	FALSE	FALSE	NA	+	+	0.0526	0.311302302899633	0	0.590145628541481	0.493278052640605	0	0.818306009893226	FALSE	FALSE	0	0	0.499488016391459	FALSE	0.520978049458183	1	1	1	-1	-1	1	-0.0306921655102246	-0.160230572417838	0.410125560070873	FALSE	rs718087	1	FALSE	FALSE
ENSG00000148229.8	POLE3	17.2265299404075	9.00185901771448	-	0.000124836540401532	FALSE	TRUE	FALSE	FALSE	NA	-	-	7.47e-08	0.500517062557209	0.214668904990492	0.68843119793906	0	0	0.421863652352192	FALSE	TRUE	0.290812905616883	0	0.4999473603729	FALSE	0.398833009169214	-1	-1	1	-0.00150383651127355	-1	1	0.42139850643782	0.33935863536785	0.630298872562502	FALSE	rs2676623	1	FALSE	FALSE
ENSG00000143624.9	INTS3	14.3891524883961	6.90058603485264	+	0.000125751961093361	TRUE	FALSE	FALSE	FALSE	NA	+	+	3.66e-06	0.241397351555624	0	0.588656140436395	0	0	0.474608068277563	FALSE	FALSE	0	0	0.470981261656722	FALSE	0.162989719366491	1	0.589962431401447	1	0.273605404476398	-0.344497394498366	1	0.0468675813491138	-0.0489362907122364	0.315872545096978	FALSE	rs11586156	1	FALSE	FALSE
ENSG00000128228.4	SDF2L1	11.9103208257299	18.8185191516327	-	0.000125996008334485	FALSE	TRUE	FALSE	FALSE	NA	-	-	0.000622	0.247615552630226	0	0.706319749123871	0	0	0.328167992810408	FALSE	FALSE	0.244852371204597	0	0.567313477638416	FALSE	0.423728813559322	-1	-1	1	1	0.609203058946174	1	0.497121749155246	0.399112012429998	0.717893955168096	FALSE	rs4820495	1	FALSE	FALSE
ENSG00000058262.5	SEC61A1	37.4141761315115	28.6744187250692	+	0.000126423837819299	TRUE	FALSE	FALSE	FALSE	NA	+	-	0.339	0	0	0.393449669098555	0	0	0.500448096800354	FALSE	FALSE	0	0	0	FALSE	0.581272575715477	0.952803489208444	0.873768595678371	1	0.953673903958662	0.00558906122598878	1	0.383039456881394	0.31662812259417	0.589831698015895	FALSE	rs62270939	1	FALSE	FALSE
ENSG00000165512.4	ZNF22	2.97896763436642	2.64868007979304	-	0.000127088784185054	FALSE	TRUE	FALSE	FALSE	NA	-	-	1.29e-16	0.509373367769616	0	0.693660829665028	0	0	0.584583578419095	FALSE	FALSE	0.166130883705815	0	0.439736341385596	FALSE	0.355265351486524	1	0.848651413682564	1	1	-1	1	0.0550066487442388	-0.0889214953200532	0.353257980185914	FALSE	rs72790864	1	FALSE	FALSE
ENSG00000182909.5	NA	10.3547655514898	19.2650813940902	+	0.000127838370976213	TRUE	FALSE	FALSE	FALSE	NA	+	NA	NA	0	0	0.473686732052047	0	0	0.525092355286418	FALSE	FALSE	0.331176496176094	0	0.699281987541461	FALSE	0.277299249791609	-0.980848968163271	-1	1	0.364816435335601	0.202788228313334	1	0.250199707727277	0.175795074802564	0.590829571607078	FALSE	rs7257802	1	TRUE	FALSE
ENSG00000111348.4	ARHGDIB	819.583007827438	20146.0801076842	-	0.000128003077627735	FALSE	TRUE	FALSE	FALSE	NA	-	+	0.114	0.561213556759912	0	0.813638164397005	0.389934939225134	0	0.780761205849613	FALSE	FALSE	0.423030058146182	0	0.793135269772367	FALSE	0.195054181717144	1	0.796199390395657	1	-1	-1	-0.000842693200840795	0.116889283358446	0.0124228715320268	0.398554782663097	FALSE	rs4764204	1	FALSE	FALSE
ENSG00000116473.10	RAP1A	16.6465728821363	18.1033076282409	-	0.000128335090420526	FALSE	TRUE	FALSE	FALSE	NA	-	-	0.0495	0	0	0.583741011812612	0.187461989348367	0	0.691248795830806	FALSE	FALSE	0	0	0.336334745989327	FALSE	0.341539316476799	1	1	1	-0.0412049204714191	-1	1	0.0691561331080369	-0.0677028603617595	0.379247983103343	FALSE	rs12120896	1	FALSE	FALSE
ENSG00000188976.6	NOC2L	11.2840546875	5.04611807266158	+	0.000128623517534541	TRUE	FALSE	FALSE	FALSE	NA	+	-	0.203	0	0	0.418941160696796	0	0	0.393920489985095	FALSE	FALSE	0	0	0.378698322287435	FALSE	0.618727424284524	0.995173835359805	NA	NA	0.82997529220303	NA	NA	0.425993958509985	NA	NA	FALSE	rs3128342	1	FALSE	TRUE
ENSG00000204044.5	NA	13.2723485254692	112.297554758196	+	0.000130391034224652	TRUE	FALSE	FALSE	FALSE	NA	+	NA	NA	0.0557934188070142	0	0.620643616315966	0.224649352561567	0	0.855597968348312	FALSE	FALSE	0.11666143609166	0	0.676133034466763	FALSE	0.441789385940539	1	0.744880423722124	1	1	0.00533714756069771	1	0.294653294204269	0.142219653370309	0.556235664189927	FALSE	rs1206760	1	FALSE	FALSE
ENSG00000080815.13	PSEN1	13.3088317675801	5.05236599693031	+	0.000130844361031586	TRUE	FALSE	FALSE	FALSE	NA	-	+	4.35e-06	0.249632369904826	0	0.73756033617093	0	0	0.567627210819011	FALSE	FALSE	0.163830994652909	0	0.596426937956128	FALSE	0.508030008335649	-1	-0.551306790300731	1	1	0.0698187944301148	1	0.355510834506442	0.184497122208214	0.536797168487712	FALSE	rs12892244	0.994752187295341	TRUE	FALSE
ENSG00000137764.15	MAP2K5	2.839074925	0.319109089611398	+	0.000130948581767622	TRUE	FALSE	FALSE	FALSE	NA	+	-	5.14e-05	0.675395748907948	0.0885943082385712	0.860837639026165	0	0	0.408409712350016	FALSE	FALSE	0.223475123038759	0	0.445407551074745	FALSE	0.502584051125313	1	0.67142687945317	1	1	0.00582284747573576	1	0.535414054316289	0.419440195666075	0.758924683577979	FALSE	rs1960287	1	FALSE	FALSE
ENSG00000234851.3	RPL23AP42	436.892168995859	23877.0165792246	-	0.000131323696265854	FALSE	TRUE	FALSE	FALSE	NA	-	NA	NA	0.7269286872826	0.259617326964738	0.842882226325252	0	0	0.047671122018355	FALSE	TRUE	0.107251794010767	0	0.671990979189963	FALSE	0.189997221450403	1	-0.471960245603452	1	-1	-1	0.739100047525077	0.236134582316514	0.121688456058518	0.483641601751114	FALSE	rs9842480	1	FALSE	FALSE
ENSG00000151353.10	TMEM18	2.4034924836277	0.35871946692045	-	0.000131661742828353	FALSE	TRUE	FALSE	FALSE	NA	-	-	5.95e-05	0.575750833679679	0	0.757576015726899	0.0234557266467776	0	0.364491136870091	FALSE	FALSE	0.257512831237749	0	0.46745222251542	FALSE	0.216726868574604	0.390381179519875	0.262175493207678	1	9.49319341713411e-05	-0.00878268969622219	1	0.164174562014254	-0.136468295837706	0.400533971689155	FALSE	rs17729501	1	FALSE	FALSE
ENSG00000213189.4	BTF3L4P2	2.06476285211268	1.18969355782485	-	0.000131798384740863	FALSE	TRUE	FALSE	FALSE	NA	-	NA	NA	0	0	0.618579732420539	0.0178188274977814	0	0.343579458330308	FALSE	FALSE	0	0	0.20410305950729	FALSE	-0.00666851903306474	1	-0.996806027352137	1	1	-0.00251366641809401	1	0.0201706793354819	-0.078784594895006	0.206906652275961	FALSE	rs13019560	1	FALSE	FALSE
ENSG00000247627.2	MTND4P12	11.4752346475291	28.4474214539852	-	0.0001327076511989	FALSE	TRUE	FALSE	FALSE	NA	+	NA	NA	0.365429054195054	0	0.551103501643414	0	0	0.238166378286427	FALSE	FALSE	0.218152873903504	0	0.6364249113117	FALSE	0.274576271186441	-1	-1	1	1	0.010363841310888	1	0.443030548691169	0.340306636990692	0.654903359398999	FALSE	rs3733946	1	FALSE	FALSE
ENSG00000240535.3	NA	3.73302872340426	7.36056396427386	-	0.00013315382646063	FALSE	TRUE	FALSE	FALSE	NA	+	NA	NA	0.355356739049089	0	0.619430682817664	0.200713600549626	0	0.793416647665635	FALSE	FALSE	0	0	0.180166888529386	FALSE	0.597888302306196	1	1	1	-1	-0.861851007135902	1	0.436110603912212	0.32111447095569	0.654129111470277	FALSE	rs7736184	1	FALSE	FALSE
ENSG00000167476.5	JSRP1	119.125357674538	460.856943198121	-	0.000133750415926525	FALSE	TRUE	FALSE	FALSE	NA	-	+	0.349	0.22458681385825	0	0.624930979069775	0.194596345787875	0	0.639571586988306	FALSE	FALSE	0	0	0.534524456763938	FALSE	0.26196165601556	1	0.968976563468365	1	-1	-1	1	-0.0483898003252519	-0.151557104691939	0.341475553030956	FALSE	rs28887619	1	FALSE	FALSE
ENSG00000169896.11	ITGAM	41.7371745144334	89.5278588749599	+	0.000134026712578583	TRUE	FALSE	FALSE	FALSE	NA	+	+	3.25e-15	0.668279725469235	0	0.815270939983028	0.00163417206189539	0	0.778045975344366	FALSE	FALSE	0	0	0.633725634595021	FALSE	0.312531258682968	1	0.952226085474525	1	-1	-1	1	0.037573208508007	-0.124431594876569	0.453685296801387	FALSE	rs889555	1	FALSE	FALSE
ENSG00000136861.12	CDK5RAP2	4.51691860920666	0.766734023282814	+	0.00013421488426904	TRUE	FALSE	FALSE	FALSE	NA	+	-	0.000124	0	0	0.337776884996531	0.257073444353041	0	0.425939948310867	FALSE	FALSE	0	0	0	FALSE	0.360878021672687	1	1	1	1	-1	1	0.380665632349502	0.302438170254703	0.626495444362961	FALSE	rs4836840	1	FALSE	FALSE
ENSG00000126062.3	TMEM115	18.5087746583144	8.9588718584628	+	0.000134282019276948	TRUE	FALSE	FALSE	FALSE	NA	+	+	0.00563	0.333848762545517	0	0.634338848911621	0	0	0.577331400244702	FALSE	FALSE	0	0	0.45355001760323	FALSE	0.512697971658794	1	0.660056409660088	1	1	0.00124111053469735	1	0.415679526355053	0.29653699572341	0.607573002558176	FALSE	rs2023953	1	FALSE	TRUE
ENSG00000171608.11	PIK3CD	114.66351667682	377.990146225695	+	0.000134839892622667	TRUE	FALSE	FALSE	FALSE	NA	-	-	0.00558	0.648856727840588	0.290088824815728	0.796767039801521	0	0	0.476443854800068	FALSE	TRUE	0	0	0.30675489846757	FALSE	0.447124201166991	1	1	1	-1	-1	0.562773667970241	-0.0236699988521201	-0.164613915170567	0.345411629839706	FALSE	rs7539197	1	FALSE	FALSE
ENSG00000130723.13	PRRC2B	20.7605044042085	22.3255908291429	+	0.000135125298367263	TRUE	FALSE	FALSE	FALSE	NA	+	NA	NA	0	0	0.471830120487192	0	0	0.433774234889602	FALSE	FALSE	0	0	0.504480911632844	FALSE	0.430452903584329	0.734747551141994	0.790151100867507	1	0.628555455724442	0.00223589460177534	1	0.351580437687684	0.253927907229009	0.600634966859335	FALSE	rs2274852	1	FALSE	FALSE
ENSG00000255872.3	NA	1.66174733333333	0.416410359713388	-	0.000135246574650245	FALSE	TRUE	FALSE	FALSE	NA	-	NA	NA	0.250295814024585	0	0.539814256971714	0	0	0.161713644255873	FALSE	FALSE	0	0	0.258807117992429	FALSE	0.0658516254515143	1	-1	1	-0.000616216083934088	-0.00244605855904343	1	-0.00621513220902868	-0.0726201133318917	0.191658178332571	FALSE	rs4242648	1	FALSE	FALSE
ENSG00000134717.13	BTF3L4	2.58843217908214	0.762875703134801	-	0.000135554467899709	FALSE	TRUE	FALSE	FALSE	NA	-	-	0.000416	0	0	0.475857197460908	0.238444150095111	0	0.530703823057796	FALSE	FALSE	0	0	0.0122117478563154	FALSE	0.0599055293136983	1	1	1	-1	-1	1	-0.416160084473624	-0.511235551436404	-0.0948856454555845	FALSE	rs1925360	1	FALSE	FALSE
ENSG00000217130.1	NA	8.5119449195171	21.9232696495984	-	0.000135796367363687	FALSE	TRUE	FALSE	FALSE	NA	-	NA	NA	0.362928269083477	0	0.564972373540484	0	0	0.571252892501457	FALSE	FALSE	0	0	0.484597844939306	FALSE	0.0391219783273132	1	-0.959453799943543	1	-1	-1	1	0.123749621356657	-0.000338148719340778	0.452314573726457	FALSE	rs7741666	1	FALSE	FALSE
ENSG00000165629.14	ATP5C1	9.00395562098501	11.347992842707	-	0.000136635361195705	FALSE	TRUE	FALSE	FALSE	NA	-	+	0.321	0.291709667240164	0	0.555913245991342	0	0	0.65714295435234	FALSE	FALSE	0.18848463119504	0	0.726121259913847	FALSE	0.220839121978327	-1	-1	1	-1	-1	0.727582541811471	0.40171332404067	0.267196741782267	0.61394244861412	FALSE	rs2490682	0.653632243792371	TRUE	FALSE
ENSG00000196562.10	SULF2	27.8878616387758	56.0467712395632	+	0.000136878016239556	TRUE	FALSE	FALSE	FALSE	NA	+	+	0.00157	0.341740649944201	0	0.770041635162387	0.366058128445883	0	0.782806853690872	FALSE	FALSE	0	0	0.539313697029218	FALSE	0.433731592108919	1	1	1	-1	-0.64674973364375	1	-0.226592623466888	-0.328741808928118	0.149359120714902	FALSE	rs6018882	1	FALSE	FALSE
ENSG00000251235.2	SNRPCP2	1.15869831223629	0.397182049105566	-	0.000137299874661461	FALSE	TRUE	FALSE	FALSE	NA	+	NA	NA	0	0	0.0442998562720482	0	0	0	FALSE	FALSE	0	0	0.0869602674819048	FALSE	-0.0912475687691025	1	1	1	0.00326574837935777	0.00231012365525982	1	-0.427977426939312	-0.53132489644724	-0.170373939843818	FALSE	rs6862238	1	FALSE	FALSE
ENSG00000109519.8	GRPEL1	5.22707596453391	0.710755425428179	-	0.000137604995353437	FALSE	TRUE	FALSE	FALSE	NA	+	-	1.59e-05	0.525767243349639	0.0192344716384181	0.737322928211391	0.191150242663238	0	0.606799649827615	FALSE	FALSE	0.583457765227028	0	0.743193828982176	FALSE	0.365212559044179	-0.177798787110011	-0.922905470534515	1	-1	-1	0.0576737059581562	0.473961295285864	0.332859854367472	0.65083778104127	FALSE	rs10516179	1	FALSE	FALSE
ENSG00000149182.9	ARFGAP2	23.5917834425443	10.9940456130457	+	0.000137985813991254	TRUE	FALSE	FALSE	FALSE	NA	+	-	0.836	0	0	0.252441830933052	0	0	0.162413286514523	FALSE	FALSE	0	0	0.592886177992859	FALSE	0.575382050569603	0.436974157707837	-0.307835930855695	1	0.5316614666205	0.444470884907632	1	0.388775217786548	0.278204718436195	0.644585893701001	FALSE	rs2957873	1	FALSE	FALSE
ENSG00000068912.9	ERLEC1	4.87493873690338	3.07428769008521	-	0.000138277138171392	FALSE	TRUE	FALSE	FALSE	NA	-	-	0.125	0	0	0.524139570650774	0.260048336307731	0	0.600395195037217	FALSE	FALSE	0	0	0.167530808790457	FALSE	0.294526257293693	1	0.9804270251204	1	-0.360659229679654	-1	1	0.0378111406181144	-0.0699351876725551	0.336370676331022	FALSE	rs805324	1	FALSE	FALSE
ENSG00000254772.5	EEF1G	103.076264494591	857.849653017576	-	0.000138405940024442	FALSE	TRUE	FALSE	FALSE	NA	-	NA	NA	0.690339209928558	0.328000881012525	0.779864255812579	0	0	0.419772078476539	FALSE	TRUE	0.332693166324607	0	0.713869922222422	FALSE	0.359877743817727	1	-1	1	0.0289848578865726	-1	1	0.203025757956478	0.0510516703451439	0.510789655673118	FALSE	rs11230985	1	FALSE	FALSE
ENSG00000225067.2	RPL23AP2	42.0232449143469	247.290239103711	-	0.000138411297634557	FALSE	TRUE	FALSE	FALSE	NA	-	NA	NA	0.706067305412759	0.140101417280628	0.822057672827299	0	0	0.487817778101156	FALSE	FALSE	0.19613561231022	0	0.658188884499179	FALSE	0.284023339816616	1	0.0499464967346358	1	-1	-1	1	0.124632513023699	-0.0422818802441342	0.372036662251732	FALSE	rs7251278	0.737729040890899	TRUE	FALSE
ENSG00000264324.1	NA	6.71593012948207	1.73830234301136	+	0.000138433863710237	TRUE	FALSE	FALSE	FALSE	NA	+	NA	NA	0	0	0.346403662137514	0	0	0.454696043086302	FALSE	FALSE	0	0	0.512454704606174	FALSE	0.438177271464296	0.602210185340307	-0.371145949332442	1	0.366553880878415	-0.131876428756701	1	0.402147639532326	0.315715572206814	0.685576638571849	FALSE	rs71406850	1	FALSE	FALSE
ENSG00000013810.14	TACC3	46.6538477224009	77.935050433835	+	0.000138708682204383	TRUE	FALSE	FALSE	FALSE	NA	+	-	0.0684	0.618257821244089	0	0.793345117025523	0.461133215844989	0	0.738524560514605	FALSE	FALSE	0	0	0.280314932803991	FALSE	0.538371769936093	1	1	1	-1	-1	1	0.00916393913368737	-0.138210301525847	0.377346539809486	FALSE	rs11727899	1	FALSE	FALSE
ENSG00000158856.12	DMTN	23.6133240658363	249.183426518686	+	0.0001400120504483	TRUE	FALSE	FALSE	FALSE	NA	-	+	0.259	0.285987883629661	0	0.558431749688139	0.234585254634948	0	0.780723072120892	FALSE	FALSE	0	0	0	FALSE	0.564267852181161	1	1	1	0.167924247456127	-1	1	0.655952755542481	0.420616959507659	0.795180335697283	FALSE	rs10503719	1	FALSE	FALSE
ENSG00000213719.4	CLIC1	192.3661604792	2216.14444697867	-	0.000140446671379952	FALSE	TRUE	FALSE	FALSE	NA	+	+	4.65e-12	0	0	0.617409496792537	0.225982186922665	0	0.744020005055585	FALSE	FALSE	0	0	0.0938181645921488	FALSE	0.261517088080022	1	1	1	0.0866701245099301	-1	0.852269593160142	0.15166166095705	0.0679550797251945	0.49410869420992	FALSE	rs115366947	0.331288931767663	TRUE	FALSE
ENSG00000196262.9	PPIA	18.7193778274146	19.3737261447427	-	0.000140715167454784	FALSE	TRUE	FALSE	FALSE	NA	+	-	0.899	0.643700821556887	0	0.785619302621308	0	0	0.511198498270159	FALSE	FALSE	0.0486426870154272	0	0.572964994861484	FALSE	0.282022784106696	-0.10560103018184	-1	1	-1	-1	1	0.236090533818311	0.146258865984387	0.475956231303963	FALSE	rs2075066	1	FALSE	FALSE
ENSG00000104884.10	ERCC2	2.92739368195956	0.38718031550596	+	0.000141146949201991	TRUE	FALSE	FALSE	FALSE	NA	+	-	0.0402	0	0	0.579404148785082	0	0	0.257783536083255	FALSE	FALSE	0	0	0.441035069762075	FALSE	0.51058627396499	0.957611856957224	0.685400485079224	1	0.921467628919905	0.00494255962652472	1	0.432276645895447	0.372118176226267	0.665164602304617	FALSE	rs8111069	1	FALSE	FALSE
ENSG00000149781.8	FERMT3	112.142383325131	304.570857746535	+	0.000141185583179065	TRUE	FALSE	FALSE	FALSE	NA	-	+	0.000139	0	0	0.552150846737785	0.253169243887885	0	0.675433259400744	FALSE	FALSE	0	0	0.428415505381773	FALSE	0.46524034454015	1	1	1	1	0.00305586274741645	1	-0.223212746563924	-0.308612896584035	0.147472204007228	FALSE	rs660442	1	FALSE	FALSE
ENSG00000167986.9	DDB1	9.54689653067088	3.74075435929123	+	0.000141439821351969	TRUE	FALSE	FALSE	FALSE	NA	+	-	0.000419	0	0	0.344165009486349	0	0	0.598381181974061	FALSE	FALSE	0	0	0.415865184083772	FALSE	0.569602667407613	0.414195587077474	0.21049137063081	1	0.491571628206252	0.332389373001525	1	0.47514334803589	0.425326141039977	0.701903054208595	FALSE	rs955017	1	TRUE	FALSE
[truncated: 16,954 more rows]
