# Supplementary material for: Time-dependent genetic effects on gene expression implicate aging processes
Source: HighWire-hosted journal article supplement (doi:10.1101/gr.207688.116), 2017-03-16
Supplement: Supplemental_Table_S2.xlsx [file Supplemental_Table_S2.xlsx]

## Sheet: Sheet1
Supplemental Table S2: Pathway enrichment analysis of genes affected by a correlated effect of the unique environment on their expression (ρE >0.5).
Term	FDR
immune system process	2.72e-10
immune response	2.72e-10
regulation of immune response	1.13e-07
regulation of immune system process	4.78e-07
positive regulation of immune response	4.78e-07
positive regulation of immune system process	6.76e-07
defense response	7.39e-06
immune response-activating signal transduction	8.62e-06
activation of immune response	1.73e-05
regulation of cytokine biosynthetic process	1.98e-05
