# Supplementary material for: Time-dependent genetic effects on gene expression implicate aging processes
Source: HighWire-hosted journal article supplement (doi:10.1101/gr.207688.116), 2017-03-16
Supplement: Supplemental_Table_S3.xlsx [file Supplemental_Table_S3.xlsx]

## Sheet: Sheet1
Supplemental Table S3: Pathway enrichment analysis of genes differentially expressed, putative causal genes, genes with genetic correlation smaller than 1, genes that gained or lost heritability between the two time points and genes with significant heritability of the change.
Downregulated (1253 genes 1%FDR)		Upregulated (960 genes 1%FDR)		Core differentially expressed genes (216 genes) (background: DE genes)		Core differentially expressed genes (primary putative causal) (77 genes) (background: DE genes)		Genetic correlation < 1 (273 genes p<0.05)		Loss in h2 (393 genes p<0.05)		Gain in h2 (68 genes p<0.05)		heritability of the change (122 genes p<0.05)
Term	FDR	Term	FDR	Term	FDR	Term	FDR	Term	FDR	Term	FDR	Term	FDR	Term	FDR
Ribosome	1.2e-44	Lysosome	1.7e-08	Ribosome	7.64e-19	Oxidative phosphorylation	0.0002	Oxidative phosphorylation	0.007	Ribosome	5.73e-25	Vascular smooth muscle contraction	0.002	Oxidative phosphorylation	0.1921
Oxidative phospohorylation	1e-28	Spliceosome	2.6e-07	Oxidative phospohorylation	1.73e-14	Alzheimer's disease	0.0004	Parkinson's disease	0.007	Oxidative phosphorylation	0.1031	Pancreatic secretion	0.062	Parkinson's disease	0.1921
Parkinson's disease	1.3e-27	Regulation of actin cytoskeleton	5.8e-07	Parkinson's disease	1.04e-13	Parkinson's disease	0.0006	Metabolic pathways	0.075	Parkinson's disease	0.1031	Long-term depression	0.062	Antigen processing and presentation	0.1921
Huntington's disease	4.8e-23	Leukocyte transendothelial migration	6.9e-06	Alzheimer's disease	2.52e-11	Huntington's disease	0.0025	Alzheimer's disease	0.075	Metabolic pathways	0.1031	GnRH signaling pathway	0.08	Systemic lupus erythematosus	0.1921
Alzheimer's disease	1.8e-20	Protein processing in endoplasmic reticulum	0.0004	Huntington's disease	6.14e-11	Ribosome	0.0025	Huntington's disease	0.078			Neuroactive ligand-receptor interaction	0.0847	Cell adhesion molecules (CAMs)	0.1921
Cardiac muscle contraction	4.6e-06	Vibrio cholerae infection	0.001	Cardiac muscle contraction	0.0002	Vibrio cholerae infection	0.0036					Calcium signaling pathway	0.0847	Regulation of actin cytoskeleton	0.1921
RNA transport	4.4e-05	Tight junction	0.002	Proteasome	0.0011	Phagosome	0.0069					Axon guidance	0.0847	Hematopoietic cell lineage	0.1921
Protein export	0.003	Phagosome	0.002	Vibrio cholerae infection	0.0015	Protein export	0.011					Wnt signaling pathway	0.0932	Progesterone-mediated oocyte maturation	0.1921
Proteasome	0.003	Shigellosis	0.002	Protein export	0.0126	Protein processing in endoplasmic reticulum	0.011					Regulation of actin cytoskeleton	0.1432	Pancreatic secretion	0.1921
Metabolic pathways	0.008	Arrythmogenic right ventricular cardiomyopathy	0.003	Regulation of actin cytoskeleton	0.0156	Proteasome	0.027							Salivary secretion	0.1921
